# Supplementary material
Source: publisher site journal article supplement (https://www.spandidos-publications.com/5450/downloadSupplementary)
Supplement: Supplementary file 1 [file downloadSupplementary]

## Sheet: g2_VS_g1_p005fc2_c
Table SIII. Deregulated circRNAs in gastric cancer-derived mesenchymal stem cells.
ProbeName	pvalues	foldchange	GC_1_NS	GC_2_NS	GC_3_NS	GC_1_flags	GC_2_flags	GC_3_flags	BM_1_NS	BM_2_NS	BM_3_NS	BM_1_flags	BM_2_flags	BM_3_flags	ProbeName.1	Type	ProbeSeq	Accession	Source	Chromosome	Strand	Start	End	GeneSymbol	Gene_ID	Description	GO	Relation	Associated_gene	Associated_gene_description	Associated_gene_strand	circRNA_ID	circ_chrom	Hsa_hg19_circRNA_start	Hsa_hg19_circRNA_end	Hsa_hg19_circRNA_strand	genomic_length	spliced_seq_length	best_transcript	hostgene
hsa_circ_0087206	0.000704923	1828.12	11.7265	11.6704	11.607	P	P	P	1.34472	0.287974	0.661832	A	A	A	hsa_circ_0087206	circRNA	GAAGAGAACTATTTTTGGACCAGTGCAGCAAATCATGAAGTTTAAATCTTTAGATGACGT	NA	NA	NA	NA	NA	NA	NA	NA	NA	NA	NA	---	NA	NA	hsa_circ_0087206	chr9	75520873	75524675	-	3802	233	NM_000689	ALDH1A1
hsa_circ_0024888	0.00121405	677.322	11.1379	11.1129	11.093	P	P	P	2.17404	1.70957	1.02735	A	A	A	hsa_circ_0024888	circRNA	TATGCAAATGTGTCTCTGAACTAAAGTGTGATCTTATGCCAAGGCACGTCCTCAGCATGC	NA	NA	NA	NA	NA	NA	NA	NA	NA	NA	NA	---	NA	NA	hsa_circ_0024888	chr11	130274817	130286225	-	11408	2209	NM_007037	ADAMTS8
hsa_circ_0087207	8.52179e-09	563.156	9.43627	9.34204	9.37939	P	P	P	0.220529	0.317707	0.206283	A	A	A	hsa_circ_0087207	circRNA	ATGGAAGAGAACTTGGAATTTCCCGTTGGTTATGCTCATTTGGAAGATAGGGCCTGCACT	NA	NA	NA	NA	NA	NA	NA	NA	NA	NA	NA	---	NA	NA	hsa_circ_0087207	chr9	75520873	75540528	-	19655	929	NM_000689	ALDH1A1
hsa_circ_0051155	0.00145607	425.68	9.89559	10.3392	10.3021	P	P	P	1.38589	2.09438	0.446891	A	A	A	hsa_circ_0051155	circRNA	TTGGGAATTAAAGTTTGTTTCTGGCCTTTAGCCTAAGTGGGTACGTGAGGAGCTGAATCG	NA	NA	NA	NA	NA	NA	NA	NA	NA	NA	NA	---	NA	NA	hsa_circ_0051155	chr19	41709354	41713444	+	4090	1590	NM_030622	CYP2S1
hsa_circ_0024107	0.000311103	277.864	10.2461	11.6513	11.4389	P	P	P	3.04812	3.53541	2.60221	P	P	P	hsa_circ_0024107	circRNA	AAGTCAACCTTGTTTCTACTGTTTTATACACTTTCGACGTTCCCAAAATCCTGTCCAGCC	NA	NA	NA	NA	NA	NA	NA	NA	NA	NA	NA	---	NA	NA	hsa_circ_0024107	chr11	102660640	102666022	-	5382	1131	NM_002421	MMP1
hsa_circ_0024103	0.00255197	253.406	8.70332	8.77402	8.71823	P	P	P	1.44945	0.201231	0.206283	A	A	A	hsa_circ_0024103	circRNA	CTGTTCCTTAGATTGTGAATTATACACCAGATTTGCCAAGAGATGCTGTTGATTCTGCCA	NA	NA	NA	NA	NA	NA	NA	NA	NA	NA	NA	---	NA	NA	hsa_circ_0024103	chr11	102641232	102650092	-	8860	1375	NM_002425	MMP10
hsa_circ_0013242	0.000583382	239.606	7.72374	8.23413	8.36221	P	P	P	0.22529	0.250382	0.206283	A	A	A	hsa_circ_0013242	circRNA	GTCAATCAAGTCTACACTGTTCAAATAAGGCACTACAAATACTGTGGCAGCATATAATTT	NA	NA	NA	NA	NA	NA	NA	NA	NA	NA	NA	---	NA	NA	hsa_circ_0013242	chr1	95005812	95005924	-	112	112	NM_001993	F3
hsa_circ_0013239	0.00107297	234.214	10.2656	10.0062	10.1461	P	P	P	1.54887	2.48076	2.57951	A	P	P	hsa_circ_0013239	circRNA	GAATTCAGAGCAAACCTCGGACAGCCAACAATTCAGAGTTTTGAACAGGTGGGAACAAAA	NA	NA	NA	NA	NA	NA	NA	NA	NA	NA	NA	---	NA	NA	hsa_circ_0013239	chr1	94997876	94998824	-	948	339	NM_001993	F3
hsa_circ_0051151	0.00157059	212.403	7.18314	8.33047	8.27152	P	P	P	0.187381	0.44588	0.206283	A	A	A	hsa_circ_0051151	circRNA	AATTAAAGTTTGTTTCTGGCCTTTAGCCTACTGAGTAAGAAGTACGGACCGGTGTTCACC	NA	NA	NA	NA	NA	NA	NA	NA	NA	NA	NA	---	NA	NA	hsa_circ_0051151	chr19	41700448	41713444	+	12996	2389	NM_030622	CYP2S1
hsa_circ_0024108	0.000294234	200.813	10.3144	10.1254	10.2151	P	P	P	2.57157	2.87172	2.18853	A	P	A	hsa_circ_0024108	circRNA	ATACACTTTCGATTGAAAATTACACGCCAGATTTGCCAAGAGCAGATGTGGACCATGCCA	NA	NA	NA	NA	NA	NA	NA	NA	NA	NA	NA	---	NA	NA	hsa_circ_0024108	chr11	102660640	102667893	-	7253	1562	NM_002421	MMP1
hsa_circ_0086294	1.11931e-06	179.592	7.69969	8.08251	7.9422	P	P	P	0.512641	0.542055	0.206283	A	A	A	hsa_circ_0086294	circRNA	ACTAGAGCACTTCATGATTCAAGTATCACAGAGTCTACAGACTCCTCCGAACACAGAGCT	NA	NA	NA	NA	NA	NA	NA	NA	NA	NA	NA	---	NA	NA	hsa_circ_0086294	chr9	6215785	6251265	+	35480	421	NM_033439	IL33
hsa_circ_0064977	0.000178567	139.431	7.67966	8.92445	8.73636	P	P	P	1.30848	0.790119	1.929	A	A	A	hsa_circ_0064977	circRNA	GAAAATGTTGTTATGCTATTAAAGTGATTTCATTCTGCTGCGTCAAGAGAGGCCCAGGAC	NA	NA	NA	NA	NA	NA	NA	NA	NA	NA	NA	---	NA	NA	hsa_circ_0064977	chr3	42299317	42306929	-	7612	1002	NM_000729	CCK
hsa_circ_0087208	8.99002e-09	138.601	7.32657	7.40135	7.39706	P	P	P	0.30783	0.265913	0.206283	A	A	A	hsa_circ_0087208	circRNA	AGGAGATAAGATCTTCATAAACAATGAATGGCATGATTCAGTGAGTGGCAAGAAATTTCC	NA	NA	NA	NA	NA	NA	NA	NA	NA	NA	NA	---	NA	NA	hsa_circ_0087208	chr9	75555063	75555168	-	105	105	NM_000689	ALDH1A1
hsa_circ_0013241	1.08801e-05	129.264	9.19343	8.80297	8.90254	P	P	P	1.85092	2.07422	1.95165	A	A	A	hsa_circ_0013241	circRNA	GGAGCCTCTGTATGAGAACTCCCCAGAGTTCACACCTTACCTGGAGAGGAGTCGGGAGGA	NA	NA	NA	NA	NA	NA	NA	NA	NA	NA	NA	---	NA	NA	hsa_circ_0013241	chr1	95001520	95007413	-	5893	633	NM_001993	F3
hsa_circ_0051152	2.27508e-08	121.658	11.9138	11.8908	11.8073	P	P	P	4.95283	4.98135	4.89857	P	P	P	hsa_circ_0051152	circRNA	TAAGGGTCCGGCTTGGGAATTAAAGTTTGTTTCTGGCCTTTAGCCTAGGGTTTTCTTCTC	NA	NA	NA	NA	NA	NA	NA	NA	NA	NA	NA	---	NA	NA	hsa_circ_0051152	chr19	41703683	41713444	+	9761	2223	NM_030622	CYP2S1
hsa_circ_0073813	0.000130372	111.522	7.18413	6.86158	6.98937	P	P	P	0.247417	0.195716	0.206283	A	A	A	hsa_circ_0073813	circRNA	TGTGGAGGAGCTCTCCGAGATGCTGGCAAACAGTCTATTAATAGTGACTGGAAGATTGAA	NA	NA	NA	NA	NA	NA	NA	NA	NA	NA	NA	---	NA	NA	hsa_circ_0073813	chr5	129015456	129019966	+	4510	312	NM_133638	ADAMTS19
hsa_circ_0077259	0.000480955	110.616	7.58744	7.48367	7.40085	P	P	P	0.282344	0.742733	0.996416	A	A	A	hsa_circ_0077259	circRNA	TTAAATCATCATTCAAGTCACAGTAATGGGGGGTTTCAAAGTGGAGAACCACACGGCGTG	NA	NA	NA	NA	NA	NA	NA	NA	NA	NA	NA	---	NA	NA	hsa_circ_0077259	chr6	87795215	87795551	-	336	336	NM_001252383	CGA
hsa_circ_0026773	1.31428e-05	91.0468	6.59732	6.79349	6.70564	P	P	P	0.216939	0.153495	0.206283	A	A	A	hsa_circ_0026773	circRNA	GATTGCTTAACCCTGCGAGCAACATAGTTACAGAACATAAGAATAACCTGGCTTCAGGCA	NA	NA	NA	NA	NA	NA	NA	NA	NA	NA	NA	---	NA	NA	hsa_circ_0026773	chr12	54849735	54854255	-	4520	334	NM_144594	GTSF1
hsa_circ_0024109	6.25033e-06	84.5178	9.71358	9.36921	9.43557	P	P	P	3.07084	3.02304	3.23579	P	P	P	hsa_circ_0024109	circRNA	ATACACTTTCGCAAGTTGAAAAGCGGAGAAATAGTGGCCCAGTGGTTGAAAAATTGAAGC	NA	NA	NA	NA	NA	NA	NA	NA	NA	NA	NA	---	NA	NA	hsa_circ_0024109	chr11	102660640	102668190	-	7550	1766	NM_001145938	MMP1
hsa_circ_0073645	1.2782e-06	79.7081	6.60652	6.46374	6.41556	P	P	P	0.219419	0.114828	0.206283	A	A	A	hsa_circ_0073645	circRNA	GCACTGAATGGGACCATATTTATACTGTTGATATAGACACATCACACACGGAAGAAATTT	NA	NA	NA	NA	NA	NA	NA	NA	NA	NA	NA	Lrrtm3	NA	NA	hsa_circ_0073645	chr5	115808768	115833083	-	24315	1511	NM_020796	SEMA6A
hsa_circ_0059354	1.17661e-06	78.6313	8.81097	8.58268	8.7366	P	P	P	2.49009	2.41246	2.34211	A	P	A	hsa_circ_0059354	circRNA	TTCAAAGAGAGTGGCCCAGTATATAAAGTTCGAGATGCCGGTACTTAAAAGCTTCATTCA	NA	NA	NA	NA	NA	NA	NA	NA	NA	NA	NA	Herc1	NA	NA	hsa_circ_0059354	chr20	4760668	4766974	-	6306	4418	NM_170774	RASSF2
hsa_circ_0073186	0.00428002	71.7527	7.11777	6.87886	6.83007	P	P	P	0.0981983	1.55455	0.206283	A	A	A	hsa_circ_0073186	circRNA	TCTCTAAGCAGGTTCAGAGCTTCATGCGAGGATGGTTGTGCAGAAGGAAATGGAAGACCA	NA	NA	NA	NA	NA	NA	NA	NA	NA	NA	NA	Hecw1	NA	NA	hsa_circ_0073186	chr5	80369017	80508382	+	139365	2721	NM_006909	RASGRF2
hsa_circ_0070441	0.00132431	69.1323	6.68911	6.50587	6.5622	P	P	P	0.957949	0.108085	0.206283	A	A	A	hsa_circ_0070441	circRNA	TGTCAAAAAGGACCAGTTGGGCAAGTGGCTGAGAAGACCAAAGAGCAAGTGACAAATGTT	NA	NA	NA	NA	NA	NA	NA	NA	NA	NA	NA	Nab2	NA	NA	hsa_circ_0070441	chr4	90743396	90743539	-	143	143	NM_000345	SNCA
hsa_circ_0000922	2.00555e-05	57.2726	6.52763	6.04704	6.11041	P	P	P	0.44631	0.541479	0.206283	A	A	A	hsa_circ_0000922	circRNA	ACAGCAAATTCTGGATGTATCAAGAGGCCAGACTTGTGTGGTGAGAAACCCTACAAGTGT	NA	NA	NA	NA	NA	NA	NA	NA	NA	NA	NA	---	NA	NA	hsa_circ_0000922	chr19	31038849	31040421	+	1572	1572	NM_014717	ZNF536
hsa_circ_0025740	0.00910927	56.1273	4.58683	6.84242	6.66532	P	P	P	1.00878	0.157255	0.206283	A	A	A	hsa_circ_0025740	circRNA	CTGTCATATAGTAAACACTCAATAAATTGCAACATATTAGTCCCGAGCGCGAGCGGAGAC	NA	NA	NA	NA	NA	NA	NA	NA	NA	NA	NA	Fry	NA	NA	hsa_circ_0025740	chr12	28115253	28122449	-	7196	1573	NM_002820	PTHLH
hsa_circ_0082723	0.000259915	54.4127	6.05598	5.59673	5.98559	P	P	P	0.0941392	0.0778887	0.206283	A	A	A	hsa_circ_0082723	circRNA	AGTTCACCAGTGACAGATGAGAACAGTGAGTCTGACAGTGACACAGAGGAGAAGCTGAAA	NA	NA	NA	NA	NA	NA	NA	NA	NA	NA	NA	---	NA	NA	hsa_circ_0082723	chr7	140259507	140268613	-	9106	349	NM_015689	DENND2A
hsa_circ_0024886	0.000735794	53.8263	6.43425	6.49191	6.39191	P	P	P	0.553494	0.429316	1.01764	A	A	A	hsa_circ_0024886	circRNA	CTTATGCCAAGGAAAAGCTTCAGGGAGCAGCAGTGTGAGAAGTATAATGCCTACAATTAC	NA	NA	NA	NA	NA	NA	NA	NA	NA	NA	NA	---	NA	NA	hsa_circ_0024886	chr11	130274817	130278835	-	4018	1555	NM_007037	ADAMTS8
hsa_circ_0082720	1.43689e-05	51.2428	5.96897	5.75552	5.93627	P	P	P	0.164582	0.259528	0.206283	A	A	A	hsa_circ_0082720	circRNA	ACAAGCTCAGGGTCAAGGTGGAAGGTCCAAGGACTGAGAAAGACCCTCGAAGGCATCCAC	NA	NA	NA	NA	NA	NA	NA	NA	NA	NA	NA	---	NA	NA	hsa_circ_0082720	chr7	140244417	140302342	-	57925	2472	NM_015689	DENND2A
hsa_circ_0082724	0.00194179	50.612	7.32372	7.25374	7.28494	P	P	P	1.68649	1.96833	1.09086	A	A	A	hsa_circ_0082724	circRNA	AAAGATACCCAAGATCCGCCAATGAAGGAGAACCCTTATGAGGACATCGAGTTACATGGT	NA	NA	NA	NA	NA	NA	NA	NA	NA	NA	NA	---	NA	NA	hsa_circ_0082724	chr7	140273607	140285510	-	11903	323	NM_015689	DENND2A
hsa_circ_0027581	0.000312711	47.4699	6.12397	6.03408	6.00789	P	P	P	0.675268	0.540686	0.206283	A	A	A	hsa_circ_0027581	circRNA	TTTGCAACTTCACATACAGAGAAACTACCACCAAGAGTGGGGTTGTAGAGAAGAGCAGCT	NA	NA	NA	NA	NA	NA	NA	NA	NA	NA	NA	SIGLEC5	NA	NA	hsa_circ_0027581	chr12	72666528	72680734	+	14206	1083	NM_013381	TRHDE
hsa_circ_0082027	1.05146e-06	46.9195	5.91268	5.78107	5.64376	P	P	P	0.377353	0.0960418	0.206283	A	A	A	hsa_circ_0082027	circRNA	CTTGTGGCGTTTGGACATATGAACAGGAACTTATGTACTTTGGAAGTTTGCTTGTCATTT	NA	NA	NA	NA	NA	NA	NA	NA	NA	NA	NA	slit1b	NA	NA	hsa_circ_0082027	chr7	120455782	120455857	-	75	75	NM_012338	TSPAN12
hsa_circ_0013240	0.00165347	45.622	6.30847	6.33376	6.59718	P	P	P	0.228659	1.26167	1.04117	A	A	A	hsa_circ_0013240	circRNA	TACCTGGAGAGTTTGGGTAGAGGCAATCCAAAAGGGCTGGATTGCTGCTTAGATTGGAGC	NA	NA	NA	NA	NA	NA	NA	NA	NA	NA	NA	---	NA	NA	hsa_circ_0013240	chr1	95001520	95006622	-	5102	1010	NM_001993	F3
hsa_circ_0082716	0.000111911	45.3822	6.0493	5.54783	5.85596	P	P	P	0.348901	0.421175	0.206283	A	A	A	hsa_circ_0082716	circRNA	GATGCCAAAGTGACAGATGAGAACAGTGAGTCTGACAGTGACACAGAGGAGAAGCTGAAA	NA	NA	NA	NA	NA	NA	NA	NA	NA	NA	NA	---	NA	NA	hsa_circ_0082716	chr7	140221654	140268613	-	46959	1371	NM_015689	DENND2A
hsa_circ_0073811	0.000103876	42.9165	5.70371	5.57327	5.80477	P	P	P	0.0936287	0.126103	0.553805	A	A	A	hsa_circ_0073811	circRNA	ATTGGCTTCTTTTTGTCAGGAGATGCAGCATGGGCATTAACCATGACAATGACCACCCAT	NA	NA	NA	NA	NA	NA	NA	NA	NA	NA	NA	---	NA	NA	hsa_circ_0073811	chr5	128956310	128958041	+	1731	292	NM_133638	ADAMTS19
hsa_circ_0061067	0.00713375	42.1949	6.7437	6.54062	6.61909	P	P	P	1.10579	1.9145	0.206283	A	A	A	hsa_circ_0061067	circRNA	TACTTGCAGTTGCAGGTGACCGAGAAGCAACTCCAAGTCGACCGGGGACCCGTGGCTCAC	NA	NA	NA	NA	NA	NA	NA	NA	NA	NA	NA	---	NA	NA	hsa_circ_0061067	chr20	60885233	60888306	-	3073	1942	NM_005560	LAMA5
hsa_circ_0059353	0.000145463	41.6798	8.83507	8.56479	8.61917	P	P	P	2.92907	3.41452	3.48509	P	P	P	hsa_circ_0059353	circRNA	AAATAAAGCACTTTTCAAAGAGAGTACACCGTGCTCCGGCTAATGATTCGACAGAGGCTG	NA	NA	NA	NA	NA	NA	NA	NA	NA	NA	NA	Herc1	NA	NA	hsa_circ_0059353	chr20	4760668	4764988	-	4320	4320	NM_170774	RASSF2
hsa_circ_0073184	0.000530527	39.4667	5.22663	5.55694	5.66542	P	P	P	0.160582	0.209233	0.206283	A	A	A	hsa_circ_0073184	circRNA	GTGCCACATATGATTAATTATGCAGACATTTTGATTGAGAGGGAAGTATTAATGCAGAAG	NA	NA	NA	NA	NA	NA	NA	NA	NA	NA	NA	Hecw1	NA	NA	hsa_circ_0073184	chr5	80363850	80404897	+	41047	1443	NM_006909	RASGRF2
hsa_circ_0004761	0.000356639	38.4004	5.9174	5.36981	5.53777	P	P	P	0.286448	0.339855	0.459662	A	A	A	hsa_circ_0004761	circRNA	ACTCACCAAGGGTCAAGGTGGAAGGTCCAAGGACTGAGAAAGACCCTCGAAGGCATCCAC	NA	NA	NA	NA	NA	NA	NA	NA	NA	NA	NA	---	NA	NA	hsa_circ_0004761	chr7	140285388	140302342	-	16954	1390	NM_015689	DENND2A
hsa_circ_0023529	0.00291823	35.5413	7.04311	8.35915	8.50442	P	P	P	2.56181	3.29783	2.89305	A	P	P	hsa_circ_0023529	circRNA	TCATCCATAAAGCAAGCTCAACCTTGGGACACATAGTATGACCATTAGGTGTTTCGTCTC	NA	NA	NA	NA	NA	NA	NA	NA	NA	NA	NA	TCEANC2	NA	NA	hsa_circ_0023529	chr11	73685715	73692677	-	6962	1522	NM_003355	UCP2
hsa_circ_0073199	1.78107e-07	35.2662	5.22853	5.27838	5.31568	P	P	P	0.0898356	0.104352	0.206283	A	A	A	hsa_circ_0073199	circRNA	ATATCCTCAGGTCATTGGAATTGTTTTTTGCTACCAGCCAGAACAACAGAGGTGAACATT	NA	NA	NA	NA	NA	NA	NA	NA	NA	NA	NA	hells	NA	NA	hsa_circ_0073199	chr5	80409356	80497261	+	87905	819	NM_006909	RASGRF2
hsa_circ_0079224	0.000842239	34.5722	6.14502	5.61516	5.63378	P	P	P	0.102556	0.531935	1.25178	A	A	A	hsa_circ_0079224	circRNA	AAAGACGATGGCTATCAGATCTCTTGGGAAGTGTACGGCAGGAACGACTCTCGTCTCACG	NA	NA	NA	NA	NA	NA	NA	NA	NA	NA	NA	LOC524810	NA	NA	hsa_circ_0079224	chr7	4116629	4169729	+	53100	1119	NM_152744	SDK1
hsa_circ_0085308	2.69203e-06	32.9401	5.37771	5.40342	5.30003	P	P	P	0.374527	0.370722	0.206283	A	A	A	hsa_circ_0085308	circRNA	TCAAATGCTCGAGCTCTAGAAATGCACCTGAATTCACACAGTGAAGACAAAGGCTCAGGT	NA	NA	NA	NA	NA	NA	NA	NA	NA	NA	NA	znf865	NA	NA	hsa_circ_0085308	chr8	106646473	106811176	+	164703	544	NM_012082	ZFPM2
hsa_circ_0073816	0.00232409	32.7921	6.91508	6.90098	6.92858	P	P	P	1.6837	2.31796	1.50628	A	A	A	hsa_circ_0073816	circRNA	CTGGTCTAAGCTCTCCGAGATGCTGGCAAACAGTCTATTAATAGTGACTGGAAGATTGAA	NA	NA	NA	NA	NA	NA	NA	NA	NA	NA	NA	---	NA	NA	hsa_circ_0073816	chr5	129015456	129040084	+	24628	806	NM_133638	ADAMTS19
hsa_circ_0085306	0.0015181	32.6065	6.0606	5.91098	6.01113	P	P	P	0.501041	1.00625	1.29069	A	A	A	hsa_circ_0085306	circRNA	TTGTTGGAGAAGGCCGCTTGAAGATGCCATTGAAGATGAGGAAGAAGAATGTCCATCAGA	NA	NA	NA	NA	NA	NA	NA	NA	NA	NA	NA	znf84	NA	NA	hsa_circ_0085306	chr8	106431371	106816767	+	385396	4417	NM_012082	ZFPM2
hsa_circ_0073812	0.000333633	32.5899	5.14631	5.00043	5.41184	P	P	P	0.117555	0.184716	0.206283	A	A	A	hsa_circ_0073812	circRNA	CTGGATGAAGCATGTTATTTGCACAGGATTATGGTGCAAGGTAGAAGGTGAGAAAGAATG	NA	NA	NA	NA	NA	NA	NA	NA	NA	NA	NA	---	NA	NA	hsa_circ_0073812	chr5	128977551	128984663	+	7112	406	NM_133638	ADAMTS19
hsa_circ_0004390	0.00311399	32.1429	6.80872	6.744	6.70186	P	P	P	1.10088	1.93947	2.02882	A	A	A	hsa_circ_0004390	circRNA	ACTGTCTTAGGATGTTCACTTCTCCACAATGAATGAGTGTCACTATGACAAGCACATGGA	NA	NA	NA	NA	NA	NA	NA	NA	NA	NA	NA	---	NA	NA	hsa_circ_0004390	chr1	85331067	85331821	-	754	754	NM_012152	LPAR3
hsa_circ_0082718	0.00803984	32.1425	6.02546	5.86907	5.81938	P	P	P	0.104849	0.375062	1.69132	A	A	A	hsa_circ_0082718	circRNA	CCTCAGACAGTGACAGATGAGAACAGTGAGTCTGACAGTGACACAGAGGAGAAGCTGAAA	NA	NA	NA	NA	NA	NA	NA	NA	NA	NA	NA	---	NA	NA	hsa_circ_0082718	chr7	140225550	140268613	-	43063	1007	NM_015689	DENND2A
hsa_circ_0073181	0.000140402	31.8758	5.02122	5.07443	5.34236	P	P	P	0.163837	0.103822	0.206283	A	A	A	hsa_circ_0073181	circRNA	CGCGTGGATCTGTGTAACAAGCTAAAACGAAGTATTCAAAAAGTATTACTTTACTGTTCT	NA	NA	NA	NA	NA	NA	NA	NA	NA	NA	NA	Hecw1	NA	NA	hsa_circ_0073181	chr5	80338695	80409739	+	71044	2182	NM_006909	RASGRF2
hsa_circ_0015152	0.000211526	31.074	4.90019	5.80661	5.41548	P	P	P	0.56587	0.0788751	0.677344	A	A	A	hsa_circ_0015152	circRNA	TTCAGTCAGGTTAAAACAACGGACAATAAAAGAATGAACACATTCCAGCGGCGCGTCCTG	NA	NA	NA	NA	NA	NA	NA	NA	NA	NA	NA	---	NA	NA	hsa_circ_0015152	chr1	169075946	169101960	+	26014	2200	NM_001677	ATP1B1
hsa_circ_0082719	0.000486607	30.9634	5.31329	4.89965	5.14818	P	P	P	0.17498	0.15157	0.206283	A	A	A	hsa_circ_0082719	circRNA	AGACAAGCTCAGTTGGAAAGGTCTTTCAAGTTCATGAGAGAAGCTGAGGACCAACTGAAG	NA	NA	NA	NA	NA	NA	NA	NA	NA	NA	NA	---	NA	NA	hsa_circ_0082719	chr7	140244417	140259617	-	15200	548	NM_015689	DENND2A
hsa_circ_0073197	1.05151e-05	30.5857	5.09248	5.53632	5.34612	P	P	P	0.179932	0.520642	0.480602	A	A	A	hsa_circ_0073197	circRNA	AGTCCACCAGTGTGTGGACAATATACGATGTAATGGTTTAATGACTATAGTGTTTGAAGA	NA	NA	NA	NA	NA	NA	NA	NA	NA	NA	NA	Heg1	NA	NA	hsa_circ_0073197	chr5	80404814	80422982	+	18168	931	NM_006909	RASGRF2
hsa_circ_0079223	0.00437001	30.4667	5.82349	5.90444	5.58237	P	P	P	0.461739	1.51929	0.206283	A	A	A	hsa_circ_0079223	circRNA	TTGAGGGGCAGGCTATCAGATCTCTTGGGAAGTGTACGGCAGGAACGACTCTCGTCTCAC	NA	NA	NA	NA	NA	NA	NA	NA	NA	NA	NA	LOC524810	NA	NA	hsa_circ_0079223	chr7	4116629	4119216	+	2587	314	NM_152744	SDK1
hsa_circ_0026344	6.82493e-05	29.8999	9.78863	10.3972	10.3031	P	P	P	5.11801	5.5356	5.16283	P	P	P	hsa_circ_0026344	circRNA	ATAGGTCTGCAATAAACCATGGTTAAATCCTGAGTCCTCTCAGGCCTAGCTCAGATGATG	NA	NA	NA	NA	NA	NA	NA	NA	NA	NA	NA	---	NA	NA	hsa_circ_0026344	chr12	52314542	52317145	+	2603	2603	NM_000020	ACVRL1
hsa_circ_0010027	3.9227e-05	29.4391	9.37716	8.98068	9.20712	P	P	P	4.27866	4.59111	4.02805	P	P	P	hsa_circ_0010027	circRNA	AGTCACTCCACGGCCAGCACAGGCCAGCCAGAAGATGACACTGAGACTACAGGTTTGGAA	NA	NA	NA	NA	NA	NA	NA	NA	NA	NA	NA	Cdk8	NA	NA	hsa_circ_0010027	chr1	13933667	13937011	+	3344	264	NM_006474	PDPN
hsa_circ_0073192	0.000238495	29.341	6.51102	6.23835	6.49842	P	P	P	1.53648	1.52732	1.57509	A	A	A	hsa_circ_0073192	circRNA	CATCAGTCAGGTTCTCTTATTCAAGTACCTTCCGTTGAGAGGGGGAAACTTAGTAAAGTT	NA	NA	NA	NA	NA	NA	NA	NA	NA	NA	NA	hecw1b	NA	NA	hsa_circ_0073192	chr5	80388619	80390811	+	2192	365	NM_006909	RASGRF2
hsa_circ_0019169	0.000802976	28.9402	6.35467	6.25212	6.31594	P	P	P	1.74062	1.37873	1.18409	A	A	A	hsa_circ_0019169	circRNA	CTCGTTGCAAGTCAAAACCTGGTTTCAGAATCGACGCGCTAAATGGAGGAGACTAAAACA	NA	NA	NA	NA	NA	NA	NA	NA	NA	NA	NA	---	NA	NA	hsa_circ_0019169	chr10	94452458	94455408	+	2950	1156	NM_002729	HHEX
hsa_circ_0026342	0.000697381	28.9375	10.0208	10.5928	10.4615	P	P	P	5.55699	5.57446	5.43514	P	P	P	hsa_circ_0026342	circRNA	AATAGGTCTGCAATAAACCATGGTTAAATCCTGAGCTTCATCGCCTCAGACATGACCTCC	NA	NA	NA	NA	NA	NA	NA	NA	NA	NA	NA	---	NA	NA	hsa_circ_0026342	chr12	52309008	52317145	+	8137	3208	NM_000020	ACVRL1
hsa_circ_0010026	3.82496e-05	28.3969	9.85048	9.55237	9.74621	P	P	P	5.04875	4.99195	4.60128	P	P	P	hsa_circ_0010026	circRNA	GACAACTCTGCCAGCACAGGCCAGCCAGAAGATGACACTGAGACTACAGGTTTGGAAGGC	NA	NA	NA	NA	NA	NA	NA	NA	NA	NA	NA	cdk-7	NA	NA	hsa_circ_0010026	chr1	13933667	13933801	+	134	134	NM_006474	PDPN
hsa_circ_0005160	0.00141764	28.332	6.31765	6.31759	6.25421	P	P	P	1.08139	1.52282	1.73772	A	A	A	hsa_circ_0005160	circRNA	AGTCCACCAGACAGGTGGGGTTCTGTCTCTAATAGACTGCACATTGATTGAGGAGCCAGA	NA	NA	NA	NA	NA	NA	NA	NA	NA	NA	NA	Hectd2	NA	NA	hsa_circ_0005160	chr5	80390114	80422982	+	32868	1135	NM_006909	RASGRF2
hsa_circ_0059355	0.000231413	28.2301	8.17639	8.10201	8.10152	P	P	P	3.44036	3.36171	3.10012	P	P	P	hsa_circ_0059355	circRNA	AAGCACTTTTCAAAGAGAGGCCCATGTGAGCAGATCTCCAAAGTGTTCCTAATGGAGAAG	NA	NA	NA	NA	NA	NA	NA	NA	NA	NA	NA	Herc1	NA	NA	hsa_circ_0059355	chr20	4760668	4768347	-	7679	4487	NM_170774	RASSF2
hsa_circ_0054221	0.000214097	28.1478	7.15015	6.76009	7.11404	P	P	P	2.28332	2.14954	2.17427	A	A	A	hsa_circ_0054221	circRNA	CTCATGACAGGTATTGCGCAGCGATGCACGGCCATCAAGTACCACTTTTCTCAGCCCATC	NA	NA	NA	NA	NA	NA	NA	NA	NA	NA	NA	Rp9	NA	NA	hsa_circ_0054221	chr2	39931220	39934326	+	3106	252	NM_152390	TMEM178
hsa_circ_0035196	0.00873567	28.0417	6.04815	5.85841	5.79039	P	P	P	1.88171	0.644867	0.206283	A	A	A	hsa_circ_0035196	circRNA	CAGTGTGCAGACTGTTTATGACCAGTGGTTCATCACCCTTTTTAACATTGTTTACACATC	NA	NA	NA	NA	NA	NA	NA	NA	NA	NA	NA	---	NA	NA	hsa_circ_0035196	chr15	50168474	50171656	-	3182	330	NM_024837	ATP8B4
hsa_circ_0087438	0.0033708	27.9432	7.56033	7.42455	7.77861	P	P	P	1.97783	3.1501	2.98999	A	P	P	hsa_circ_0087438	circRNA	TTTGACATGAGACACAACTGACTATGTTGCATATGTGGCTAAGGACCCTGTTAATCGCAG	NA	NA	NA	NA	NA	NA	NA	NA	NA	NA	NA	Mgam	NA	NA	hsa_circ_0087438	chr9	91656940	91680495	-	23555	577	NM_016848	SHC3
hsa_circ_0015066	0.000134604	27.9068	6.25681	6.59013	6.38235	P	P	P	1.83768	1.24506	1.69476	A	A	A	hsa_circ_0015066	circRNA	AGAATTCATTCAAACGGAGGCTCCTAAAGAGGGCCAAGGAGATTAAGATCAAGTTGGGAA	NA	NA	NA	NA	NA	NA	NA	NA	NA	NA	NA	ints7	NA	NA	hsa_circ_0015066	chr1	163122339	163138158	-	15819	340	NM_003617	RGS5
hsa_circ_0085307	0.0022758	27.7489	5.66838	5.79986	5.76121	P	P	P	0.473995	0.88656	1.35459	A	A	A	hsa_circ_0085307	circRNA	ACTGCATTGTGTACAGCAAAGGTGATGATGAAGGAATCCAGGAGACAGCAGAATCAGATG	NA	NA	NA	NA	NA	NA	NA	NA	NA	NA	NA	ZNF841	NA	NA	hsa_circ_0085307	chr8	106456507	106646585	+	190078	333	NM_012082	ZFPM2
hsa_circ_0069821	0.0157038	27.3748	6.68819	6.66963	6.69674	P	P	P	2.66032	1.83451	0.471979	A	A	A	hsa_circ_0069821	circRNA	ACAATCTAAGACAAGAAGAAGGGAGGCAAATTCCAGCCTTTTAAAAAGTTGTTTGGCAAA	NA	NA	NA	NA	NA	NA	NA	NA	NA	NA	NA	---	NA	NA	hsa_circ_0069821	chr4	57138486	57138658	+	172	172	NM_020722	KIAA1211
hsa_circ_0003708	0.00819165	27.2283	7.32288	7.26542	7.49765	P	P	P	2.98018	2.89202	1.51305	P	P	A	hsa_circ_0003708	circRNA	AGAAGGCACGAATGCAGAGTCTGGATGAGCCATGGACGGAAGAGGAGGGAGATGGCTCAG	NA	NA	NA	NA	NA	NA	NA	NA	NA	NA	NA	Mga	NA	NA	hsa_circ_0003708	chr9	91652907	91661909	-	9002	694	NM_016848	SHC3
hsa_circ_0073200	0.00458916	26.9475	5.57129	5.50888	5.50867	P	P	P	0.556053	1.33326	0.206283	A	A	A	hsa_circ_0073200	circRNA	TGAATATTCAGGCCCTTTCACAAGATGACCAAGATGACATCCACCTAAAATTAGAGGATA	NA	NA	NA	NA	NA	NA	NA	NA	NA	NA	NA	Helq	NA	NA	hsa_circ_0073200	chr5	80502663	80525981	+	23318	5200	NM_006909	RASGRF2
hsa_circ_0027720	0.00224813	26.7089	5.59547	5.04667	4.70348	P	P	P	0.351407	0.391903	0.521429	A	A	A	hsa_circ_0027720	circRNA	AACAAGGGGAACAGAACCAACCAGGCTTTACAGGCGAGGAGGAAACGGTGCCGGAGCGCG	NA	NA	NA	NA	NA	NA	NA	NA	NA	NA	NA	Dhc93AB	NA	NA	hsa_circ_0027720	chr12	94542498	94621011	+	78513	2229	NM_005761	PLXNC1
hsa_circ_0068488	0.00152744	25.7801	6.37565	7.36842	7.2692	P	P	P	2.04381	3.08921	1.57555	A	P	A	hsa_circ_0068488	circRNA	AATAAACCCTCGTGGATAACCAACATGGAGTGCAGTGACAACCTCTTCACTCAAAGGACT	NA	NA	NA	NA	NA	NA	NA	NA	NA	NA	NA	---	NA	NA	hsa_circ_0068488	chr3	186951869	186974648	-	22779	3242	NM_139125	MASP1
hsa_circ_0026343	2.28429e-06	25.5983	11.1408	11.1253	11.0179	P	P	P	6.40003	6.52718	6.31829	P	P	P	hsa_circ_0026343	circRNA	ACACAATAGGTCTGCAATAAACCATGGTTAAATCCTGAGCCTGGCTGTGATGCACTCACA	NA	NA	NA	NA	NA	NA	NA	NA	NA	NA	NA	---	NA	NA	hsa_circ_0026343	chr12	52309819	52317145	+	7326	2932	NM_000020	ACVRL1
hsa_circ_0026777	0.000174554	25.471	5.08725	4.97498	5.02293	P	P	P	0.290177	0.555165	0.206283	A	A	A	hsa_circ_0026777	circRNA	TGGGATAAAGCACTTGGATTCAGCTTCTTCATTTCCAACATGGAAGAAACTTACACCGAC	NA	NA	NA	NA	NA	NA	NA	NA	NA	NA	NA	---	NA	NA	hsa_circ_0026777	chr12	54856425	54865061	-	8636	357	NM_144594	GTSF1
hsa_circ_0002142	1.50417e-05	25.4463	5.2469	4.83599	5.01137	P	P	P	0.405038	0.489904	0.206283	A	A	A	hsa_circ_0002142	circRNA	ATCCAGTGCAGACCACAGGGTCAAGGTGGAAGGTCCAAGGACTGAGAAAGACCCTCGAAG	NA	NA	NA	NA	NA	NA	NA	NA	NA	NA	NA	---	NA	NA	hsa_circ_0002142	chr7	140301202	140302342	-	1140	1140	NM_015689	DENND2A
hsa_circ_0027723	0.00167793	24.2546	5.14458	4.66864	4.45271	P	P	P	0.218911	0.127317	0.206283	A	A	A	hsa_circ_0027723	circRNA	ATACGTGACGAAAGAAGGGGATCAACCTGAAAGAGTCCAACCAATCGCATCATCTACCTT	NA	NA	NA	NA	NA	NA	NA	NA	NA	NA	NA	DHCR24	NA	NA	hsa_circ_0027723	chr12	94562928	94648664	+	85736	1921	NM_005761	PLXNC1
hsa_circ_0026775	8.85533e-05	24.2272	4.8857	4.76505	4.57695	P	P	P	0.0952464	0.144997	0.206283	A	A	A	hsa_circ_0026775	circRNA	GATTGCTTAACACTTGGATTCAGCTTCTTCATTTCCAACATGGAAGAAACTTACACCGAC	NA	NA	NA	NA	NA	NA	NA	NA	NA	NA	NA	---	NA	NA	hsa_circ_0026775	chr12	54849735	54865061	-	15326	755	NM_144594	GTSF1
hsa_circ_0087138	0.00138953	24.1495	7.50013	7.46365	7.48158	P	P	P	2.7168	3.21511	2.66582	P	P	P	hsa_circ_0087138	circRNA	CCCTGGACAGATTGGACGACTGATTATTGGACAGAATGGCATCTTGTCGACACCTGCGGT	NA	NA	NA	NA	NA	NA	NA	NA	NA	NA	NA	Chl1	NA	NA	hsa_circ_0087138	chr9	70993114	71007389	+	14275	782	NM_021965	PGM5
hsa_circ_0082895	3.71457e-05	23.8042	13.2672	13.16	13.1051	P	P	P	8.73024	8.65808	8.41009	P	P	P	hsa_circ_0082895	circRNA	CTGCCTCTCAAGGAAACGGAAATGCCTGGCCTGCATCAAACTGGGCTCTGAGGACAAAGT	NA	NA	NA	NA	NA	NA	NA	NA	NA	NA	NA	HDAC2	NA	NA	hsa_circ_0082895	chr7	150035406	150036170	-	764	345	NM_002889	RARRES2
hsa_circ_0073814	0.000841288	23.1777	6.934	6.49283	6.70272	P	P	P	2.25321	2.54077	1.61775	A	P	A	hsa_circ_0073814	circRNA	ATCATCTCAGCTCTCCGAGATGCTGGCAAACAGTCTATTAATAGTGACTGGAAGATTGAA	NA	NA	NA	NA	NA	NA	NA	NA	NA	NA	NA	---	NA	NA	hsa_circ_0073814	chr5	129015456	129024342	+	8886	4688	NM_133638	ADAMTS19
hsa_circ_0059358	6.5847e-05	23.0007	8.41665	8.17152	7.93965	P	P	P	3.67153	3.78984	3.52267	P	P	P	hsa_circ_0059358	circRNA	ATAAAGCACTTTTCAAAGAGAGTATCTGGAATCCCGGCGCCTAGAACGTGTTTTTCGGGA	NA	NA	NA	NA	NA	NA	NA	NA	NA	NA	NA	Herc2	NA	NA	hsa_circ_0059358	chr20	4760668	4803049	-	42381	12565	NM_170774	RASSF2
hsa_circ_0019167	0.00851361	22.7381	7.08256	7.23951	6.91384	P	P	P	1.71066	3.33293	2.18908	A	P	A	hsa_circ_0019167	circRNA	TTGACTATAAAATAAAGCCGTCCGTGGGACGACTGACCTCGTTGCAAGGATAAATGTAGC	NA	NA	NA	NA	NA	NA	NA	NA	NA	NA	NA	---	NA	NA	hsa_circ_0019167	chr10	94449680	94455408	+	5728	1759	NM_002729	HHEX
hsa_circ_0056921	0.00206698	22.631	6.84904	6.69388	6.72028	P	P	P	2.61871	1.7827	2.24643	P	A	A	hsa_circ_0056921	circRNA	CAGCAAAGTGGTCTTTACTGGAATCTTTGCAGCTGAAATGGTATTAAAACTGATTGCCAT	NA	NA	NA	NA	NA	NA	NA	NA	NA	NA	NA	LOC105612261	NA	NA	hsa_circ_0056921	chr2	167128908	167134823	-	5915	1008	NM_002977	SCN9A
hsa_circ_0066446	0.000499721	22.5655	7.39266	7.22937	7.23346	P	P	P	2.45983	2.84215	3.01668	A	P	P	hsa_circ_0066446	circRNA	GCCTGGAAAGCACTGGTTATGGCGAGTGTTTGCTTAACGAACCTGAATCCAGACCCTACC	NA	NA	NA	NA	NA	NA	NA	NA	NA	NA	NA	---	NA	NA	hsa_circ_0066446	chr3	64633615	64635454	-	1839	247	NM_182920	ADAMTS9
hsa_circ_0086605	9.10795e-05	22.2089	10.377	10.4381	10.3606	P	P	P	6.00212	5.76304	5.98057	P	P	P	hsa_circ_0086605	circRNA	ATATATCATGAGTGAATAAATGTCTTGCCTACTCACGTCTCAGAGGCACACCCTACTGCG	NA	NA	NA	NA	NA	NA	NA	NA	NA	NA	NA	PTTG1IP	NA	NA	hsa_circ_0086605	chr9	27220046	27230172	+	10126	1214	NM_000459	TEK
hsa_circ_0025542	1.74205e-05	22.162	4.74164	5.12093	4.72682	P	P	P	0.648593	0.322858	0.206283	A	A	A	hsa_circ_0025542	circRNA	GACAAGAAAGTCGTGACAAAGCAAATTGTCTGGTATCATGAATTTGGAACACCATTCCAG	NA	NA	NA	NA	NA	NA	NA	NA	NA	NA	NA	---	NA	NA	hsa_circ_0025542	chr12	16500075	16507312	+	7237	191	NM_145792	MGST1
hsa_circ_0087436	0.000206201	22.1352	8.18944	8.04825	8.23676	P	P	P	3.9546	3.57326	3.50681	P	P	P	hsa_circ_0087436	circRNA	GTGAAAAGTATTTGCAGGAAAAGAGCAGACTTATTACCAGGGAAGACACTTAGGAGACAC	NA	NA	NA	NA	NA	NA	NA	NA	NA	NA	NA	Mgam	NA	NA	hsa_circ_0087436	chr9	91620685	91660748	-	40063	8348	NM_016848	SHC3
hsa_circ_0066445	0.000275165	21.8484	6.88035	6.7427	6.73842	P	P	P	2.59423	2.20125	2.18378	A	A	A	hsa_circ_0066445	circRNA	TTGGAGCTCGCACTGGTTATGGCGAGTGTTTGCTTAACGAACCTGAATCCAGACCCTACC	NA	NA	NA	NA	NA	NA	NA	NA	NA	NA	NA	---	NA	NA	hsa_circ_0066445	chr3	64579933	64635454	-	55521	2893	NM_182920	ADAMTS9
hsa_circ_0003380	1.84014e-05	21.5469	6.35582	6.10726	6.3889	P	P	P	2.09052	1.69038	1.76699	A	A	A	hsa_circ_0003380	circRNA	GATGGACCAGGGCCGCTTGAAGATGCCATTGAAGATGAGGAAGAAGAATGTCCATCAGAG	NA	NA	NA	NA	NA	NA	NA	NA	NA	NA	NA	ZNF828	NA	NA	hsa_circ_0003380	chr8	106431371	106456609	+	25238	261	NM_012082	ZFPM2
hsa_circ_0066447	0.00423558	21.3262	3.93315	4.73026	4.87792	P	P	P	0.140177	0.116237	0.206283	A	A	A	hsa_circ_0066447	circRNA	GTCGAAAATATATCACTGAGTTTTTAGAGTAGCCTCTATCTATAAAGACCCAAGTATTGG	NA	NA	NA	NA	NA	NA	NA	NA	NA	NA	NA	---	NA	NA	hsa_circ_0066447	chr3	64636692	64641551	-	4859	494	NM_182920	ADAMTS9
hsa_circ_0010870	0.0183945	21.2986	6.04389	8.12216	8.0504	P	P	P	3.55243	3.28574	2.83625	P	P	P	hsa_circ_0010870	circRNA	AAGTTAACATTTTGCATAATAAACGATTTTTAAACACTTGAACGCAGGTGCTGGCGCCCG	NA	NA	NA	NA	NA	NA	NA	NA	NA	NA	NA	---	NA	NA	hsa_circ_0010870	chr1	23884420	23884906	-	486	486	NM_002167	ID3
hsa_circ_0020963	0.00430782	21.2982	6.85018	6.57915	6.82803	P	P	P	2.74754	1.5671	2.47565	P	A	P	hsa_circ_0020963	circRNA	TATTCTGCTAAGAGATCACCTCCTGGGAAATGTGCTGGTGACCGTTTTGGCAATCCATTT	NA	NA	NA	NA	NA	NA	NA	NA	NA	NA	NA	---	NA	NA	hsa_circ_0020963	chr11	5274420	5274635	-	215	215	NM_000184	HBG2
hsa_circ_0073193	0.016189	21.2756	6.34274	6.23205	6.3493	P	P	P	1.5333	0.655125	2.74649	A	A	P	hsa_circ_0073193	circRNA	ATATCCTCAGGTTCTCTTATTCAAGTACCTTCCGTTGAGAGGGGGAAACTTAGTAAAGTT	NA	NA	NA	NA	NA	NA	NA	NA	NA	NA	NA	Hecw2	NA	NA	hsa_circ_0073193	chr5	80388619	80497261	+	108642	1516	NM_006909	RASGRF2
hsa_circ_0080038	0.0108446	21.2268	5.75852	5.95173	5.8754	P	P	P	1.2697	2.15904	0.437755	A	A	A	hsa_circ_0080038	circRNA	TGTGCTGTGCACATAGGTGTTTAATAAACATTTGTTGGCAGAAGTGGACTCCAAGGCCAC	NA	NA	NA	NA	NA	NA	NA	NA	NA	NA	NA	akt2	NA	NA	hsa_circ_0080038	chr7	44552134	44574228	-	22094	3008	NM_013389	NPC1L1
hsa_circ_0007738	1.54195e-05	20.8301	8.32818	8.08815	8.17959	P	P	P	3.99942	3.63438	3.80741	P	P	P	hsa_circ_0007738	circRNA	AGAAGGGCAGTACTTGGGGTGCATTGAAGTTCTGCGCTCAATGAGGTCTCTTGACTTCAG	NA	NA	NA	NA	NA	NA	NA	NA	NA	NA	NA	Mga	NA	NA	hsa_circ_0007738	chr9	91723962	91727541	-	3579	3579	NM_016848	SHC3
hsa_circ_0027725	2.46002e-06	20.6764	4.65484	4.54194	4.75701	P	P	P	0.29422	0.348021	0.206283	A	A	A	hsa_circ_0027725	circRNA	AGATATGCATAAAGAAGGGGATCAACCTGAAAGAGTCCAACCAATCGCATCATCTACCTT	NA	NA	NA	NA	NA	NA	NA	NA	NA	NA	NA	DHCR24	NA	NA	hsa_circ_0027725	chr12	94562928	94653151	+	90223	2064	NM_005761	PLXNC1
hsa_circ_0059492	0.00312036	20.5768	5.21464	4.83322	4.90913	P	P	P	0.178384	1.24176	0.206283	A	A	A	hsa_circ_0059492	circRNA	TGGAGGCTAAGCAACCACAGATTTGTACGGCAACTGCACTCTGAGGCATTCTGGGACATC	NA	NA	NA	NA	NA	NA	NA	NA	NA	NA	NA	Ccdc91	NA	NA	hsa_circ_0059492	chr20	17436992	17437093	+	101	101	NM_002594	PCSK2
hsa_circ_0068559	0.000946744	20.5495	4.16812	4.61453	4.68347	P	P	P	0.12952	0.0972351	0.206283	A	A	A	hsa_circ_0068559	circRNA	CATGAGTGAGGATAGCCAATAAATCATCTTTGAGAAAGCCAGGAAGAGGAGCATAGAAAG	NA	NA	NA	NA	NA	NA	NA	NA	NA	NA	NA	Zfp809	NA	NA	hsa_circ_0068559	chr3	194789012	194901236	-	112224	25887	NM_152531	XXYLT1
hsa_circ_0087739	0.00165284	20.0871	4.17334	5.29373	5.5371	P	P	P	0.280365	0.509563	1.33601	A	A	A	hsa_circ_0087739	circRNA	ACAGTGGAAATGGCTACAATATTTAACCTCAGAATAAATGACGTGCCGAGAGAGCGAGCG	NA	NA	NA	NA	NA	NA	NA	NA	NA	NA	NA	ANKRD28	NA	NA	hsa_circ_0087739	chr9	102584136	102596341	+	12205	2588	NM_173199	NR4A3
hsa_circ_0063696	0.00201886	19.7745	4.71829	4.04159	4.6381	P	P	P	0.237823	0.1247	0.206283	A	A	A	hsa_circ_0063696	circRNA	CAGTGTGAAGGGTCAGTCGACGTGGATGAGTGCTCAGAGGGCACAGATGACTGCCACATC	NA	NA	NA	NA	NA	NA	NA	NA	NA	NA	NA	LOC106121170	NA	NA	hsa_circ_0063696	chr22	43735109	43735241	-	132	132	NM_173050	SCUBE1
hsa_circ_0073185	4.65341e-07	19.7405	4.33278	4.481	4.4772	P	P	P	0.0844783	0.0926005	0.206283	A	A	A	hsa_circ_0073185	circRNA	GTGCCACATATGATTAAATTATTGCTCTTAATAAAACCAAAGAACGAATGCGACCTTACC	NA	NA	NA	NA	NA	NA	NA	NA	NA	NA	NA	Hecw1	NA	NA	hsa_circ_0073185	chr5	80366310	80404897	+	38587	1295	NM_006909	RASGRF2
hsa_circ_0002493	4.40384e-05	19.6662	8.01162	7.7742	7.9244	P	P	P	3.81978	3.56985	3.40742	P	P	P	hsa_circ_0002493	circRNA	AATCGCAGAGTACTTGGGGTGCATTGAAGTTCTGCGCTCAATGAGGTCTCTTGACTTCAG	NA	NA	NA	NA	NA	NA	NA	NA	NA	NA	NA	Mga	NA	NA	hsa_circ_0002493	chr9	91680443	91727541	-	47098	361	NM_016848	SHC3
hsa_circ_0020966	0.000622269	19.6596	6.49734	6.44603	6.24642	P	P	P	1.79672	1.97392	2.45661	A	A	P	hsa_circ_0020966	circRNA	TTCAGTAATCCTCCTGGGTAACGTGATGGTGATTATTCTGGCTACTCACTTTGGCAAGGA	NA	NA	NA	NA	NA	NA	NA	NA	NA	NA	NA	---	NA	NA	hsa_circ_0020966	chr11	5289579	5289827	-	248	248	NM_005330	HBE1
hsa_circ_0084778	4.29027e-06	19.6358	12.2478	12.1651	12.0876	P	P	P	7.91348	7.83181	7.87223	P	P	P	hsa_circ_0084778	circRNA	GGGTGTCCATCTCCAAGTTCAATAAACTAATTCATTTAACTTTGATTACTGTGCCAGTAA	NA	NA	NA	NA	NA	NA	NA	NA	NA	NA	NA	Hydin	NA	NA	hsa_circ_0084778	chr8	74233166	74237520	+	4354	2651	NM_172037	RDH10
hsa_circ_0081880	0.0172917	19.6133	6.33311	6.24321	6.13496	P	P	P	2.22794	0.507637	2.44614	A	A	P	hsa_circ_0081880	circRNA	TCAAGTTTGATTTTCTGAACGCCTGAAAGTAGTAGATGTGATAGGCACCAAAGTATACAA	NA	NA	NA	NA	NA	NA	NA	NA	NA	NA	NA	Ermap	NA	NA	hsa_circ_0081880	chr7	106793621	106802256	+	8635	2643	NM_002736	PRKAR2B
hsa_circ_0014956	0.000216318	18.9899	6.68179	6.67078	6.68196	P	P	P	2.30437	2.46281	2.51751	A	A	P	hsa_circ_0014956	circRNA	AATCTTGGTTTTTGGCATCTGGTTTGCCTATAGCCGAGGCCACTTTGACACTGTGAAGTT	NA	NA	NA	NA	NA	NA	NA	NA	NA	NA	NA	---	NA	NA	hsa_circ_0014956	chr1	160969429	160970917	-	1488	669	NM_016946	F11R
hsa_circ_0084062	0.000654465	18.9056	14.9321	14.8312	14.4117	P	P	P	10.5467	10.4069	10.5458	P	P	P	hsa_circ_0084062	circRNA	CATCATTGAACATCTCTGTGCCAGCGAGTTTGGCACAACGGTGTGTCCTCCCTGTGACAA	NA	NA	NA	NA	NA	NA	NA	NA	NA	NA	NA	MCM8	NA	NA	hsa_circ_0084062	chr8	41160979	41161057	-	78	78	NM_003012	SFRP1
hsa_circ_0023364	0.00331795	18.8906	3.93797	5.38131	5.34467	P	P	P	0.119948	1.04075	1.01783	A	A	A	hsa_circ_0023364	circRNA	TTATATTAAACTTCCCCTGTTCAAATAAGGGTTGTGAACAAGTATCAGATCAATGGCCTG	NA	NA	NA	NA	NA	NA	NA	NA	NA	NA	NA	---	NA	NA	hsa_circ_0023364	chr11	71145456	71152486	-	7030	1980	NM_001360	DHCR7
hsa_circ_0027582	0.00923297	18.758	5.71631	5.75326	5.77705	P	P	P	1.95673	1.69012	0.578214	A	A	A	hsa_circ_0027582	circRNA	AGAAACTACCACCAAGAGTGGGGTTGTAATTCCTTGGTGTTACTCAGTTTTCGCCTACAC	NA	NA	NA	NA	NA	NA	NA	NA	NA	NA	NA	SIGLEC5	NA	NA	hsa_circ_0027582	chr12	72680460	72680734	+	274	274	NM_013381	TRHDE
hsa_circ_0027587	0.000592615	18.4532	4.5507	4.51429	4.15824	P	P	P	0.172123	0.257754	0.206283	A	A	A	hsa_circ_0027587	circRNA	CTTATTTCAGATTGGATTTCCAGCAACAGGAACAGGCTTTAAAAAGAAATGGGAAATATG	NA	NA	NA	NA	NA	NA	NA	NA	NA	NA	NA	Siglece	NA	NA	hsa_circ_0027587	chr12	72956632	73015531	+	58899	821	NM_013381	TRHDE
hsa_circ_0084063	0.000629324	18.2119	15.3636	15.1975	14.9407	P	P	P	11.0133	10.9473	11.0109	P	P	P	hsa_circ_0084063	circRNA	AATCTGAGGCCATCATTGAACATCTCTGTGCCAGCGAGTTTGGCACTCCAGCCCTGCAGC	NA	NA	NA	NA	NA	NA	NA	NA	NA	NA	NA	Mcm9	NA	NA	hsa_circ_0084063	chr8	41160979	41166990	-	6011	934	NM_003012	SFRP1
hsa_circ_0082721	0.00474535	18.028	6.12657	5.9208	6.06617	P	P	P	1.19041	1.87967	2.31919	A	A	A	hsa_circ_0082721	circRNA	AGGAACTGAGCCTGGAGGCAAAGGGAAGCGCCTTCCTGAAGTTTACTGCATTGTGAGCCG	NA	NA	NA	NA	NA	NA	NA	NA	NA	NA	NA	---	NA	NA	hsa_circ_0082721	chr7	140246598	140255513	-	8915	219	NM_015689	DENND2A
hsa_circ_0089684	0.000558474	17.8653	9.49669	10.375	10.3603	P	P	P	6.10871	6.18698	5.53866	P	P	P	hsa_circ_0089684	circRNA	ATCATGCTTGTTAATAAATTGTGTGGTTCAAATCTGAGGAGGGCGACCTGTATGCGGAGC	NA	NA	NA	NA	NA	NA	NA	NA	NA	NA	NA	---	NA	NA	hsa_circ_0089684	chr9	140173104	140177093	+	3989	3989	NM_017723	C9orf167
hsa_circ_0015117	0.0272331	17.7176	3.16001	5.51109	5.21666	P	P	P	1.01347	0.342797	0.918549	A	A	A	hsa_circ_0015117	circRNA	GATTTTTAACCGAAAACTTGCTGATGAAGTTAATACAATCTGTTGGAATGACACTGGAGA	NA	NA	NA	NA	NA	NA	NA	NA	NA	NA	NA	---	NA	NA	hsa_circ_0015117	chr1	167935866	168035703	+	99837	2526	NM_001198956	DCAF6
hsa_circ_0082896	0.000273141	17.1979	12.2759	11.9328	11.9486	P	P	P	7.90333	7.9435	8.02205	P	P	P	hsa_circ_0082896	circRNA	CTGCCTCTCACCCTTCCCAGCTGGAATATTTGTGAGGCTGGAATTTAAGCTGCAGCAGAC	NA	NA	NA	NA	NA	NA	NA	NA	NA	NA	NA	HDAC2	NA	NA	hsa_circ_0082896	chr7	150035406	150037293	-	1887	450	NM_002889	RARRES2
hsa_circ_0084060	9.21155e-05	17.035	14.5515	14.1526	13.9839	P	P	P	10.2589	9.92059	10.2708	P	P	P	hsa_circ_0084060	circRNA	ATTAATCAATGATAGCACAACGGTGTGTCCTCCCTGTGACAACGAGTTGAAATCTGAGGC	NA	NA	NA	NA	NA	NA	NA	NA	NA	NA	NA	mcm6.2-a	NA	NA	hsa_circ_0084060	chr8	41119475	41161057	-	41582	3611	NM_003012	SFRP1
hsa_circ_0000348	0.00193955	16.7884	3.88592	4.37523	4.50662	P	P	P	0.174435	0.249112	0.206283	A	A	A	hsa_circ_0000348	circRNA	ATAGACGACGAGAGTGGATGGAAGTATGATGTGATGGATATAATTATGGGACACTGTGTG	NA	NA	NA	NA	NA	NA	NA	NA	NA	NA	NA	---	NA	NA	hsa_circ_0000348	chr11	92085261	92088570	+	3309	3309	NM_001008781	FAT3
hsa_circ_0051153	0.0010232	16.6715	4.36145	3.89886	4.3347	P	P	P	0.12964	0.124735	0.206283	A	A	A	hsa_circ_0051153	circRNA	CATGTCCAAAGAGGAACAAAACCCAGGCACAGAATTCACCAACAAGAACATGCTGATGAC	NA	NA	NA	NA	NA	NA	NA	NA	NA	NA	NA	---	NA	NA	hsa_circ_0051153	chr19	41707135	41707277	+	142	142	NM_030622	CYP2S1
hsa_circ_0079215	0.0153808	16.6644	6.17773	5.84172	5.98091	P	P	P	1.47791	2.80351	0.854979	A	P	A	hsa_circ_0079215	circRNA	TGGAAGTGATGTACATTATTCCATCTTTGCAGAAGCTCGATGCTGGGTTTTACCGCTGCG	NA	NA	NA	NA	NA	NA	NA	NA	NA	NA	NA	LOC523631	NA	NA	hsa_circ_0079215	chr7	3678635	4014177	+	335542	1536	NM_152744	SDK1
hsa_circ_0037101	0.00190338	16.6223	4.20057	3.9301	4.6648	P	P	P	0.335783	0.180635	0.206283	A	A	A	hsa_circ_0037101	circRNA	TCTAGAAGCAAGATTGGAAACCTGGAAGATTACTACCATTTTTATCACAGCAAAACCTTT	NA	NA	NA	NA	NA	NA	NA	NA	NA	NA	NA	Ccdc93	NA	NA	hsa_circ_0037101	chr15	101929668	101983865	-	54197	1013	NM_002570	PCSK6
hsa_circ_0005754	0.0013903	16.5443	9.11266	9.80735	9.55519	P	P	P	5.42814	5.57923	5.40003	P	P	P	hsa_circ_0005754	circRNA	CAGCTTTCCCACTCTCTTCTGCTTATTACTTTCCAGAACTTTTTGAAGCTCCTAGGGGGA	NA	NA	NA	NA	NA	NA	NA	NA	NA	NA	NA	---	NA	NA	hsa_circ_0005754	chr15	33076591	33076875	+	284	284	NM_001103184	FMN1
hsa_circ_0055266	7.30922e-05	16.5423	11.3657	11.204	11.29	P	P	P	7.30838	7.35728	7.03367	P	P	P	hsa_circ_0055266	circRNA	GAAGATCAAGGCATGGAGTCCGCTGGAATTCATGAGACAACCTACAATTCCATCATGAAG	NA	NA	NA	NA	NA	NA	NA	NA	NA	NA	NA	---	NA	NA	hsa_circ_0055266	chr2	74143710	74143892	+	182	182	NM_001615	ACTG2
hsa_circ_0055267	8.16627e-06	16.3652	11.0053	10.7128	10.9246	P	P	P	6.97255	6.77033	6.80962	P	P	P	hsa_circ_0055267	circRNA	ACAAGCCTTAGCATGGAGTCCGCTGGAATTCATGAGACAACCTACAATTCCATCATGAAG	NA	NA	NA	NA	NA	NA	NA	NA	NA	NA	NA	---	NA	NA	hsa_circ_0055267	chr2	74143710	74146780	+	3070	404	NM_001615	ACTG2
hsa_circ_0073190	0.00313463	16.2778	6.96688	6.64377	6.9071	P	P	P	2.6557	2.26155	3.33693	A	A	P	hsa_circ_0073190	circRNA	GTGACATCAGTCAGATCCCCAGATATATCATCACACTCCATGAGCTCCTTGCTCACACAC	NA	NA	NA	NA	NA	NA	NA	NA	NA	NA	NA	hecw1b	NA	NA	hsa_circ_0073190	chr5	80381620	80390811	+	9191	594	NM_006909	RASGRF2
hsa_circ_0068491	0.0123209	16.2528	6.15498	5.91875	5.8431	P	P	P	2.03295	0.818507	2.5317	A	A	P	hsa_circ_0068491	circRNA	TATGACTACATCAAGATGTGGACGAGTGCAAGGAGAGGGAGGACGAGGAGCTGTCCTGTG	NA	NA	NA	NA	NA	NA	NA	NA	NA	NA	NA	---	NA	NA	hsa_circ_0068491	chr3	186974451	186978660	-	4209	329	NM_001879	MASP1
hsa_circ_0055265	8.10189e-06	16.2026	7.60453	7.55306	7.70653	P	P	P	3.5673	3.74068	3.49476	P	P	P	hsa_circ_0055265	circRNA	TCATGAAACATTAAAACCTACAAGCCTTAGCATCGTCCTGGATTCAGGTGATGGCGTCAC	NA	NA	NA	NA	NA	NA	NA	NA	NA	NA	NA	---	NA	NA	hsa_circ_0055265	chr2	74140611	74146780	+	6169	758	NM_001615	ACTG2
hsa_circ_0066442	0.00036948	16.1799	7.47855	7.25805	7.2062	P	P	P	3.50544	2.92759	3.41212	P	P	P	hsa_circ_0066442	circRNA	GTCTATAACTTGCTCAGTGTCTTGTGGTGTTGGAGTGATGCAGAGATCTGTGCAATGTTT	NA	NA	NA	NA	NA	NA	NA	NA	NA	NA	NA	---	NA	NA	hsa_circ_0066442	chr3	64527513	64527646	-	133	133	NM_182920	ADAMTS9
hsa_circ_0080947	7.75297e-05	15.8502	4.17344	4.25111	4.06124	P	P	P	0.164049	0.162031	0.206283	A	A	A	hsa_circ_0080947	circRNA	CCATCCTTTCTCGAGTTGGAAGAGTTTGTAAGGATATTATATTCAAACTAGACACACATA	NA	NA	NA	NA	NA	NA	NA	NA	NA	NA	NA	LRRC37B	NA	NA	hsa_circ_0080947	chr7	84685032	84697600	-	12568	366	NM_152754	SEMA3D
hsa_circ_0087437	0.000574934	15.822	8.22652	7.71248	8.06644	P	P	P	4.12907	3.99426	3.9723	P	P	P	hsa_circ_0087437	circRNA	ACCTCTTTGACATGAGGTCCTCGGACATCTACAGCACGCCAGAAGGGAAACTGCACGTGG	NA	NA	NA	NA	NA	NA	NA	NA	NA	NA	NA	Mgam	NA	NA	hsa_circ_0087437	chr9	91656940	91657099	-	159	159	NM_016848	SHC3
hsa_circ_0091277	1.05538e-06	15.8173	4.22073	4.07718	4.26693	P	P	P	0.287397	0.122901	0.206283	A	A	A	hsa_circ_0091277	circRNA	TGCTATTAAAGGACTTCATGAGAAGACTGGTGCATTTACAGCTGTTAAAGTGATGAACGC	NA	NA	NA	NA	NA	NA	NA	NA	NA	NA	NA	ANXA2	NA	NA	hsa_circ_0091277	chrX	105124191	105188033	+	63842	3936	NM_198465	NRK
hsa_circ_0042103	0.00153162	15.7327	4.4566	4.47473	4.57224	P	P	P	0.676902	0.135581	0.699313	A	A	A	hsa_circ_0042103	circRNA	GCCATAAAAGTTTTACAGTTAAGACTTCAACAAAGAAGGACCCAGGAACAACTGGCTAAC	NA	NA	NA	NA	NA	NA	NA	NA	NA	NA	NA	---	NA	NA	hsa_circ_0042103	chr17	12608444	12626325	+	17881	360	NM_001146312	MYOCD
hsa_circ_0055259	6.55937e-07	15.7165	13.546	13.4696	13.4743	P	P	P	9.58571	9.45512	9.52471	P	P	P	hsa_circ_0055259	circRNA	AGACTACTCTGTTACCAGTCATGAAACATTAAAACCTACAAGCCTTAGTGCTCCAGTCCC	NA	NA	NA	NA	NA	NA	NA	NA	NA	NA	NA	---	NA	NA	hsa_circ_0055259	chr2	74128402	74146780	+	18378	1245	NM_001615	ACTG2
hsa_circ_0027722	0.000238809	15.6478	4.25464	4.39736	4.21583	P	P	P	0.575877	0.15037	0.206283	A	A	A	hsa_circ_0027722	circRNA	ATCCCAACCAGAGCAACCTACAAAGAAAGAAGGGGATCAACCTGAAAGAGTCCAACCAAT	NA	NA	NA	NA	NA	NA	NA	NA	NA	NA	NA	Dhc93AB	NA	NA	hsa_circ_0027722	chr12	94562928	94613939	+	51011	640	NM_005761	PLXNC1
hsa_circ_0074027	6.52097e-06	15.5902	13.9363	13.8586	13.7478	P	P	P	9.91756	9.9984	9.73247	P	P	P	hsa_circ_0074027	circRNA	TACGTCTATTAAAACCATAGTCCGAGCGTGCTAAGCACCTGGCGCAGGGACTGCTGGAAC	NA	NA	NA	NA	NA	NA	NA	NA	NA	NA	NA	ctnnal1	NA	NA	hsa_circ_0074027	chr5	134363423	134369964	-	6541	2383	NM_002653	PITX1
hsa_circ_0023980	2.16326e-06	15.4268	10.4579	10.6173	10.6725	P	P	P	6.73473	6.59415	6.58005	P	P	P	hsa_circ_0023980	circRNA	TTGCCACATCTGAGGAACAAACTGGGATGTCACTGATTTTATCAGTCATTTGTTCATGCA	NA	NA	NA	NA	NA	NA	NA	NA	NA	NA	NA	---	NA	NA	hsa_circ_0023980	chr11	88061279	88061364	-	85	85	NM_148170	CTSC
hsa_circ_0037100	0.00314852	15.3759	4.55196	3.95235	3.7685	P	P	P	0.2336	0.123265	0.206283	A	A	A	hsa_circ_0037100	circRNA	TCTAGAAGCAATGATTCCTACGCCAGCTACGACGTGAACGGCAATGATTATGACCCATCT	NA	NA	NA	NA	NA	NA	NA	NA	NA	NA	NA	Ccdc93	NA	NA	hsa_circ_0037100	chr15	101929668	101970268	-	40600	653	NM_002570	PCSK6
hsa_circ_0003406	1.72052e-05	15.1182	4.30612	4.19122	4.26903	P	P	P	0.430613	0.368026	0.206283	A	A	A	hsa_circ_0003406	circRNA	AAGTTAAAAGTGGATTAAACTTCATTGACTTGATGGTGCGACAAGGGAATATTGACAACC	NA	NA	NA	NA	NA	NA	NA	NA	NA	NA	NA	tsp1l	NA	NA	hsa_circ_0003406	chr16	77850817	77896787	+	45970	489	NM_020927	VAT1L
hsa_circ_0003625	4.02262e-06	14.9887	9.32656	9.26005	9.07348	P	P	P	5.40626	5.20563	5.33544	P	P	P	hsa_circ_0003625	circRNA	TGTACAGTGCAAAGGAAGAAGTGTCAGAAGGGAGAACGAGTGCATCCTAACGTTAGTCAA	NA	NA	NA	NA	NA	NA	NA	NA	NA	NA	NA	LOC100170034	NA	NA	hsa_circ_0003625	chr6	127469792	127476583	+	6791	537	NM_032784	RSPO3
hsa_circ_0068835	0.000727243	14.9129	10.6378	10.076	10.4707	P	P	P	6.5359	6.59474	6.40821	P	P	P	hsa_circ_0068835	circRNA	TCTGTTGCTCACAAGGGCCGCGCATAGCTCCGACTACAGCATGTGGAGGAAGAACCAGTA	NA	NA	NA	NA	NA	NA	NA	NA	NA	NA	NA	Nt5c3	NA	NA	hsa_circ_0068835	chr4	1160720	1165274	-	4554	1315	NM_001199021	SPON2
hsa_circ_0060922	0.000197524	14.8911	4.28301	3.93558	4.27559	P	P	P	0.261633	0.359492	0.206283	A	A	A	hsa_circ_0060922	circRNA	TACGCCTCAGACAGCAAACAGTCTAATGTGGATTCTCTACAATTTATCCCGTAATCCCCA	NA	NA	NA	NA	NA	NA	NA	NA	NA	NA	NA	---	NA	NA	hsa_circ_0060922	chr20	52773707	52775662	-	1955	565	NM_000782	CYP24A1
hsa_circ_0060932	0.00602003	14.8683	3.40978	4.40144	4.20118	P	P	P	0.147264	0.15331	0.206283	A	A	A	hsa_circ_0060932	circRNA	ACCCAAAGGAACAGCAAACAGTCTAATGTGGATTCTCTACAATTTATCCCGTAATCCCCA	NA	NA	NA	NA	NA	NA	NA	NA	NA	NA	NA	---	NA	NA	hsa_circ_0060932	chr20	52774624	52775662	-	1038	246	NM_000782	CYP24A1
hsa_circ_0062016	4.43809e-06	14.6123	12.8937	12.8651	12.7477	P	P	P	8.92859	8.96372	9.00981	P	P	P	hsa_circ_0062016	circRNA	AAGCCAATTCAGACAGGCAAATAAAAGTGACCTTTTACACTGACTATCAGCGTTCCCGGC	NA	NA	NA	NA	NA	NA	NA	NA	NA	NA	NA	---	NA	NA	hsa_circ_0062016	chr21	46925271	46933634	+	8363	2329	NM_030582	COL18A1
hsa_circ_0084777	6.12662e-05	14.5822	8.705	8.54524	8.65725	P	P	P	4.57639	4.89759	4.82059	P	P	P	hsa_circ_0084777	circRNA	ATGGTCAATTGCCATGCACACTTCTGGAGAGCCGGCCCGGAGCGCTCTGACTTGCAAGCG	NA	NA	NA	NA	NA	NA	NA	NA	NA	NA	NA	Hydin	NA	NA	hsa_circ_0084777	chr8	74206836	74209664	+	2828	1213	NM_172037	RDH10
hsa_circ_0037099	0.000564193	14.4921	4.54899	4.77298	4.31961	P	P	P	0.641904	0.268899	1.0803	A	A	A	hsa_circ_0037099	circRNA	CAAGAGACCCATGATTCCTACGCCAGCTACGACGTGAACGGCAATGATTATGACCCATCT	NA	NA	NA	NA	NA	NA	NA	NA	NA	NA	NA	Ccdc93	NA	NA	hsa_circ_0037099	chr15	101922296	101970268	-	47972	875	NM_002570	PCSK6
hsa_circ_0027726	0.00128934	14.4546	4.3819	4.62593	4.73278	P	P	P	1.02111	0.853511	0.206283	A	A	A	hsa_circ_0027726	circRNA	GAAAGTTCGGGTTATTCTTGGTGAGAATTTGACTTCAAATTGTCCAGAGGTTATCTATGA	NA	NA	NA	NA	NA	NA	NA	NA	NA	NA	NA	Dhcr7	NA	NA	hsa_circ_0027726	chr12	94575221	94642188	+	66967	1575	NM_005761	PLXNC1
hsa_circ_0085305	0.000345758	14.4542	6.07134	5.80343	5.85504	P	P	P	1.70559	2.14652	2.27241	A	A	A	hsa_circ_0085305	circRNA	TTGTGTACAGCAAAGGGCCGCTTGAAGATGCCATTGAAGATGAGGAAGAAGAATGTCCAT	NA	NA	NA	NA	NA	NA	NA	NA	NA	NA	NA	znf84	NA	NA	hsa_circ_0085305	chr8	106431371	106646585	+	215214	492	NM_012082	ZFPM2
hsa_circ_0060923	0.000280024	14.3896	4.15064	4.06989	3.91945	P	P	P	0.211331	0.19088	0.206283	A	A	A	hsa_circ_0060923	circRNA	AATACGCCTCAGTCAAAGCTTGTATCGACAACCGGTTAGAGAAGTATTCTCAGCAGCCTA	NA	NA	NA	NA	NA	NA	NA	NA	NA	NA	NA	---	NA	NA	hsa_circ_0060923	chr20	52773707	52779401	-	5694	711	NM_000782	CYP24A1
hsa_circ_0079589	3.03436e-05	14.3524	4.12778	3.89949	3.89449	P	P	P	0.118547	0.0767514	0.206283	A	A	A	hsa_circ_0079589	circRNA	TCAGTTCAAGAGCACTAGACAAACTGAATGGATTTCAGTTAGAGAATTTCACCTTGAAAG	NA	NA	NA	NA	NA	NA	NA	NA	NA	NA	NA	---	NA	NA	hsa_circ_0079589	chr7	23357257	23391205	-	33948	994	NM_006547	IGF2BP3
hsa_circ_0078039	0.0195549	14.3179	5.32227	5.57586	5.44715	P	P	P	0.376572	1.28413	2.44338	A	A	P	hsa_circ_0078039	circRNA	TGTGGTAGATTTCGGTTAGCAGATAACTCAGGATGTTTCGCTCAGATCGAATGTGGAGCT	NA	NA	NA	NA	NA	NA	NA	NA	NA	NA	NA	---	NA	NA	hsa_circ_0078039	chr6	142630680	142758672	+	127992	3419	NM_020455	GPR126
hsa_circ_0061105	9.33181e-07	14.0762	4.16641	4.11197	3.99103	P	P	P	0.38227	0.234573	0.206283	A	A	A	hsa_circ_0061105	circRNA	GAACGGAGAGGGCCAGTACTGTGACATCTGCACGGCTGCCAACAGCAACAAGGCACACCC	NA	NA	NA	NA	NA	NA	NA	NA	NA	NA	NA	---	NA	NA	hsa_circ_0061105	chr20	60927297	60937608	-	10311	390	NM_005560	LAMA5
hsa_circ_0082897	0.00047552	14.0205	13.51	13.3986	13.3812	P	P	P	9.77493	9.70337	9.35193	P	P	P	hsa_circ_0082897	circRNA	ATGATAATAAAGCTGCTCTCCCAGCTGCCTCTCAGGCCAGGGTGACACGGAAGCATGCGA	NA	NA	NA	NA	NA	NA	NA	NA	NA	NA	NA	HDAC2	NA	NA	hsa_circ_0082897	chr7	150035406	150037718	-	2312	644	NM_002889	RARRES2
hsa_circ_0082028	0.0076933	13.9637	5.70677	5.63703	5.55858	P	P	P	2.35677	1.76093	1.11634	A	A	A	hsa_circ_0082028	circRNA	GGAACTTATGGGTAGAGGAAGCAGTCATTTTGACTTACTTTCCTGTGGTTCATCCGGTCA	NA	NA	NA	NA	NA	NA	NA	NA	NA	NA	NA	slit1b	NA	NA	hsa_circ_0082028	chr7	120455782	120478966	-	23184	211	NM_012338	TSPAN12
hsa_circ_0074026	7.5725e-07	13.8839	14.4696	14.3394	14.3628	P	P	P	10.6495	10.5783	10.5598	P	P	P	hsa_circ_0074026	circRNA	TGTCCATGTACGTCTATTAAAACCATAGTCCGAGCGTGCTAAGCAGTCTGGTTCAAGAAC	NA	NA	NA	NA	NA	NA	NA	NA	NA	NA	NA	CTNNA3	NA	NA	hsa_circ_0074026	chr5	134363423	134365011	-	1588	1588	NM_002653	PITX1
hsa_circ_0056925	0.000304863	13.7379	6.29046	6.65185	6.37757	P	P	P	2.98569	2.32404	2.61853	P	A	P	hsa_circ_0056925	circRNA	TTGTCGTCATTGTTTTTGCGCCTCTTATGTGAGGAGCTGAAGAGGAATTAAAATATACAG	NA	NA	NA	NA	NA	NA	NA	NA	NA	NA	NA	LOC105632962	NA	NA	hsa_circ_0056925	chr2	167162301	167168316	-	6015	646	NM_002977	SCN9A
hsa_circ_0073191	0.012525	13.691	6.71371	6.69486	6.66773	P	P	P	1.93871	3.03489	3.41004	A	P	P	hsa_circ_0073191	circRNA	ACATGGGAGTCCACCAGATCCCCAGATATATCATCACACTCCATGAGCTCCTTGCTCACA	NA	NA	NA	NA	NA	NA	NA	NA	NA	NA	NA	hecw1b	NA	NA	hsa_circ_0073191	chr5	80381620	80422982	+	41362	1525	NM_006909	RASGRF2
hsa_circ_0030979	4.54504e-06	13.5512	10.2814	10.1281	10.0746	P	P	P	6.37665	6.48176	6.34929	P	P	P	hsa_circ_0030979	circRNA	ATAACGTCCTCTCCATTAAAGTGAGATCCCACTCAAGCCCTGCTCATCAATGAGGAAAAC	NA	NA	NA	NA	NA	NA	NA	NA	NA	NA	NA	---	NA	NA	hsa_circ_0030979	chr13	113801692	113803843	+	2151	732	NM_000504	F10
hsa_circ_0084097	1.827e-05	13.4817	10.4964	10.2942	10.4151	P	P	P	6.70517	6.61355	6.63377	P	P	P	hsa_circ_0084097	circRNA	CCTGTCAAAAAATTTAAGGGACGCTGTGAAGCAATCATGGATGCAATGAAGAGAGGGCTC	NA	NA	NA	NA	NA	NA	NA	NA	NA	NA	NA	Cyp2b13	NA	NA	hsa_circ_0084097	chr8	42046451	42050729	-	4278	279	NM_000930	PLAT
hsa_circ_0059428	0.00358939	13.4646	7.31863	7.08376	7.15189	P	P	P	3.80272	3.50022	2.85237	P	P	P	hsa_circ_0059428	circRNA	AAAGCACCCGTCGTATGCTGCAACTGGTTGAAGAGGTCCAGAGCCAAACCCGTCACTGAC	NA	NA	NA	NA	NA	NA	NA	NA	NA	NA	NA	N4bp2l1	NA	NA	hsa_circ_0059428	chr20	10256076	10258374	+	2298	177	NM_003081	SNAP25
hsa_circ_0037102	4.16777e-05	13.4544	4.21077	3.88247	4.05214	P	P	P	0.31977	0.382473	0.206283	A	A	A	hsa_circ_0037102	circRNA	ATGAGCGAAAAAATGATTCCTACGCCAGCTACGACGTGAACGGCAATGATTATGACCCAT	NA	NA	NA	NA	NA	NA	NA	NA	NA	NA	NA	Ccdc93	NA	NA	hsa_circ_0037102	chr15	101933416	101970268	-	36852	552	NM_002570	PCSK6
hsa_circ_0075631	1.0926e-05	13.3658	4.27999	4.03889	4.09263	P	P	P	0.504802	0.472079	0.206283	A	A	A	hsa_circ_0075631	circRNA	TGACATCCGGGAACATCTAAAGGCCTTTGATGATGAAATCAATGCTTTTTTGGACAATAT	NA	NA	NA	NA	NA	NA	NA	NA	NA	NA	NA	---	NA	NA	hsa_circ_0075631	chr6	11000319	11011042	-	10723	330	NM_017770	ELOVL2
hsa_circ_0008226	0.00352782	13.1406	6.63636	6.54434	6.42366	P	P	P	2.50895	2.4924	3.30553	A	A	P	hsa_circ_0008226	circRNA	AGTCCACCAGGTTCTCTTATTCAAGTACCTTCCGTTGAGAGGGGGAAACTTAGTAAAGTT	NA	NA	NA	NA	NA	NA	NA	NA	NA	NA	NA	Hectd2	NA	NA	hsa_circ_0008226	chr5	80388619	80422982	+	34363	1296	NM_006909	RASGRF2
hsa_circ_0072514	0.0208289	13.1322	3.30864	5.60909	5.46709	P	P	P	1.58468	0.1137	1.91006	A	A	A	hsa_circ_0072514	circRNA	CTTGGAGACAAACTTCACTTTAAAATCTGAATGTGAAACCCAATGGAAAAAGCATGACAT	NA	NA	NA	NA	NA	NA	NA	NA	NA	NA	NA	---	NA	NA	hsa_circ_0072514	chr5	55264103	55278639	-	14536	594	NM_002184	IL6ST
hsa_circ_0058880	0.0106764	13.0583	3.29818	5.14234	5.11783	P	P	P	0.381417	1.87213	0.206283	A	A	A	hsa_circ_0058880	circRNA	ACTAAATAAAGAATTTTGGAGTTAGTTACCCTTGAAGTGCAGGCCAAGCTGGAGAACGCC	NA	NA	NA	NA	NA	NA	NA	NA	NA	NA	NA	---	NA	NA	hsa_circ_0058880	chr2	239146907	239148209	-	1302	1067	NM_018645	HES6
hsa_circ_0081881	0.00158023	12.7741	7.07297	6.8846	6.8114	P	P	P	2.83252	3.20575	3.61272	P	P	P	hsa_circ_0081881	circRNA	TCAAGTTTGAGGTAAATCAGAAGTGGAAGAGAATGGTGCAGTAGAAATCGCTCGATGCTC	NA	NA	NA	NA	NA	NA	NA	NA	NA	NA	NA	Ermap	NA	NA	hsa_circ_0081881	chr7	106797630	106802256	+	4626	2502	NM_002736	PRKAR2B
hsa_circ_0091642	0.00953542	12.5768	4.68635	4.58905	4.74878	P	P	P	0.236115	0.972837	1.56469	A	A	A	hsa_circ_0091642	circRNA	AGCTGTACTTGGCAATGAACAGTGAGGGATACTTGTACACCTCGCTCTGTTTAACCTCAT	NA	NA	NA	NA	NA	NA	NA	NA	NA	NA	NA	---	NA	NA	hsa_circ_0091642	chrX	137785145	137785249	-	104	104	NM_004114	FGF13
hsa_circ_0075469	0.000605525	12.5228	4.38279	5.24119	5.05022	P	P	P	1.74258	0.838587	1.13582	A	A	A	hsa_circ_0075469	circRNA	TGTTTCATTAATAAACAGTGTTTTGTTTTCCTCTATAAGCGGGAGTCCGCGGCGAGCGCA	NA	NA	NA	NA	NA	NA	NA	NA	NA	NA	NA	Man1b1	NA	NA	hsa_circ_0075469	chr6	2887503	2903545	-	16042	4145	NM_004155	SERPINB9
hsa_circ_0011860	0.00642385	12.4185	4.12235	4.34171	4.39539	P	P	P	1.26948	0.220755	0.206283	A	A	A	hsa_circ_0011860	circRNA	AACCTCTGGCTCAGACCTGTTCATCGAGAGGTTCTGCATGACAGGTGGGAACAGCCCGAT	NA	NA	NA	NA	NA	NA	NA	NA	NA	NA	NA	Apoc1	NA	NA	hsa_circ_0011860	chr1	40126750	40129106	-	2356	308	NM_032526	NT5C1A
hsa_circ_0063336	0.000891021	12.3431	5.32809	5.53297	5.18557	P	P	P	2.05581	1.29924	1.73783	A	A	A	hsa_circ_0063336	circRNA	GGCAATTACAGAAGCTTTTGGAGAAGTGATTATTTTTCTGTTGCCCACTTTTCAATATGA	NA	NA	NA	NA	NA	NA	NA	NA	NA	NA	NA	---	NA	NA	hsa_circ_0063336	chr22	38951361	38964294	-	12933	412	NM_007068	DMC1
hsa_circ_0086603	5.45432e-06	12.2325	7.58756	7.30766	7.45503	P	P	P	3.95935	3.85268	3.70231	P	P	P	hsa_circ_0086603	circRNA	TGCAATGAAGCTTCCTTCCTACCAGCTACTTTAACTATGACTGTGGACAAGGGAGATAAC	NA	NA	NA	NA	NA	NA	NA	NA	NA	NA	NA	PTTG1IP	NA	NA	hsa_circ_0086603	chr9	27168492	27173360	+	4868	537	NM_000459	TEK
hsa_circ_0023979	0.00441699	12.0843	6.47177	6.30621	6.50216	P	P	P	2.35688	3.31555	2.65895	A	P	P	hsa_circ_0023979	circRNA	TCGAAACCAAGTATAAAGAAGAGGGCAGCAAGGTGACCACTTACTGCAACGAGACAATGA	NA	NA	NA	NA	NA	NA	NA	NA	NA	NA	NA	---	NA	NA	hsa_circ_0023979	chr11	88033697	88045722	-	12025	439	NM_001814	CTSC
hsa_circ_0082887	0.0112382	12.0841	5.25281	5.35302	5.45049	P	P	P	1.15106	1.27656	2.46278	A	A	P	hsa_circ_0082887	circRNA	TCATTGAGATGATATATTGAGCCCATGCGTAGCCTTTTATTTGAGGCAGTGCTGGCCTTG	NA	NA	NA	NA	NA	NA	NA	NA	NA	NA	NA	---	NA	NA	hsa_circ_0082887	chr7	149946036	149990508	-	44472	626	NM_001164458	ACTR3C
hsa_circ_0090853	0.00952302	11.9999	4.62869	4.72624	4.32965	P	P	P	0.414961	0.398615	1.71874	A	A	A	hsa_circ_0090853	circRNA	TCTGCAAAGAGGACTGATGTGGAAGCTTTTCAACAGGAACTGGCTCTGCTTAAGATAGAG	NA	NA	NA	NA	NA	NA	NA	NA	NA	NA	NA	Btbd3	NA	NA	hsa_circ_0090853	chrX	55249053	55250541	+	1488	248	NM_130467	PAGE5
hsa_circ_0023977	0.00206766	11.9996	6.59985	6.26165	6.59367	P	P	P	2.33534	2.98781	3.255	A	P	P	hsa_circ_0023977	circRNA	TATGCTCAAGTATAAAGAAGAGGGCAGCAAGGTGACCACTTACTGCAACGAGACAATGAC	NA	NA	NA	NA	NA	NA	NA	NA	NA	NA	NA	---	NA	NA	hsa_circ_0023977	chr11	88029300	88045722	-	16422	571	NM_001814	CTSC
hsa_circ_0088346	0.0446684	11.9683	8.56181	10.7736	10.69	P	P	P	6.77794	6.63522	6.73776	P	P	P	hsa_circ_0088346	circRNA	AATGTACATAATAAAGTGTATGCACTTTCACTAATAGCCTCTGGCTCCTCAGGGCATTCC	NA	NA	NA	NA	NA	NA	NA	NA	NA	NA	NA	Pax8	NA	NA	hsa_circ_0088346	chr9	124101352	124132545	-	31193	3074	NM_004099	STOM
hsa_circ_0079603	0.00204557	11.942	5.19315	4.81634	4.85228	P	P	P	1.88087	1.1405	0.96652	A	A	A	hsa_circ_0079603	circRNA	ATTTACAGTGGGAGGTAAAATAGAACTGCACGGGAAACCCATAGAAGTTGAGCACTCGGT	NA	NA	NA	NA	NA	NA	NA	NA	NA	NA	NA	---	NA	NA	hsa_circ_0079603	chr7	23458394	23508161	-	49767	110	NM_006547	IGF2BP3
hsa_circ_0055261	0.00930858	11.8947	6.18186	6.14598	6.20491	P	P	P	3.08914	2.61297	1.86042	P	P	A	hsa_circ_0055261	circRNA	ACATTAAAACCTACAAGCCTTAGGTGTGATGGTGGGAATGGGCCAGAAAGACAGCTATGT	NA	NA	NA	NA	NA	NA	NA	NA	NA	NA	NA	---	NA	NA	hsa_circ_0055261	chr2	74129486	74146780	+	17294	1083	NM_001615	ACTG2
hsa_circ_0016126	0.0141092	11.8695	4.43953	5.49009	5.49237	P	P	P	0.132875	1.75469	2.30344	A	A	A	hsa_circ_0016126	circRNA	TTCTTTCTGCATTAAAATGCTCATTTCCGGAGCGTGAATGAGGTGGATTACTGCCTGTAC	NA	NA	NA	NA	NA	NA	NA	NA	NA	NA	NA	---	NA	NA	hsa_circ_0016126	chr1	204100189	204106377	-	6188	1415	NM_018208	ETNK2
hsa_circ_0021064	2.80518e-06	11.868	10.0835	10.031	10.1517	P	P	P	6.49564	6.55597	6.5094	P	P	P	hsa_circ_0021064	circRNA	ATTTCTCACTCTGGAGCCTTAATAAACTGCAATTTGTATCCGGACTCCTATTGTCTCCCC	NA	NA	NA	NA	NA	NA	NA	NA	NA	NA	NA	---	NA	NA	hsa_circ_0021064	chr11	6642557	6647896	-	5339	4099	NM_003737	DCHS1
hsa_circ_0073182	0.00245133	11.7647	5.34147	4.98418	5.08996	P	P	P	2.0834	1.33022	1.18855	A	A	A	hsa_circ_0073182	circRNA	AATAGCCACAGCTGCAGCAGGACATGGGAGTCCACCAGTATTACTTTACTGTTCTTTTTG	NA	NA	NA	NA	NA	NA	NA	NA	NA	NA	NA	Hecw1	NA	NA	hsa_circ_0073182	chr5	80338695	80422982	+	84287	2398	NM_006909	RASGRF2
hsa_circ_0027724	4.02669e-06	11.7402	3.81905	3.62757	3.81842	P	P	P	0.280163	0.122429	0.206283	A	A	A	hsa_circ_0027724	circRNA	TGCTCTGAGAACTTTCTTCCCTGAGAAAGAAGGGGATCAACCTGAAAGAGTCCAACCAAT	NA	NA	NA	NA	NA	NA	NA	NA	NA	NA	NA	DHCR24	NA	NA	hsa_circ_0027724	chr12	94562928	94649072	+	86144	2025	NM_005761	PLXNC1
hsa_circ_0000143	6.41726e-05	11.6942	6.54547	6.2503	6.2833	P	P	P	2.70507	2.63951	3.07131	P	P	P	hsa_circ_0000143	circRNA	TCCTCTACTGGGGTGGGAGCTACACCTCCATGGGCTTGATTGCCTTGGCAGTCCTGGCGT	NA	NA	NA	NA	NA	NA	NA	NA	NA	NA	NA	---	NA	NA	hsa_circ_0000143	chr1	158153725	158226854	+	73129	73036	NM_001766	CD1D
hsa_circ_0079600	0.0059941	11.6834	4.69935	4.79267	4.52028	P	P	P	1.07314	1.61976	0.467672	A	A	A	hsa_circ_0079600	circRNA	ATATAAAATTGTGCTGGATAGTTTACTAGTCCAGTATGGAGTGGTGGAGAGCTGTGAGCA	NA	NA	NA	NA	NA	NA	NA	NA	NA	NA	NA	---	NA	NA	hsa_circ_0079600	chr7	23387218	23401360	-	14142	533	NM_006547	IGF2BP3
hsa_circ_0080961	0.00585187	11.5766	4.16043	3.16828	3.77861	P	P	P	0.309317	0.15557	0.206283	A	A	A	hsa_circ_0080961	circRNA	TTTGATTGACAGCTACAGCACGGAAGGCCTAATGCCGAGTATTTTCAGCTGTTGTCTTTG	NA	NA	NA	NA	NA	NA	NA	NA	NA	NA	NA	---	NA	NA	hsa_circ_0080961	chr7	87145824	87145981	-	157	157	NM_000927	ABCB1
hsa_circ_0014229	0.00191995	11.4407	9.67138	9.50673	9.50088	P	P	P	6.119	6.31145	5.62243	P	P	P	hsa_circ_0014229	circRNA	ATTCTTGGAAGTTTTGAGTGCTTCTGAGATGTGGGCTTGCACACGCTGTTGCTATAGTAC	NA	NA	NA	NA	NA	NA	NA	NA	NA	NA	NA	LOC100653490	NA	NA	hsa_circ_0014229	chr1	153516094	153517994	-	1900	510	NM_019554	S100A4
hsa_circ_0016127	0.00178218	11.3754	4.32828	5.0872	5.28807	P	P	P	0.674031	1.84269	1.58822	A	A	A	hsa_circ_0016127	circRNA	CTTTCTGCATTAAAATGCTCATTTCCGGACCTTTCTGCAGATGTCCCTAAGGTAGAGGTG	NA	NA	NA	NA	NA	NA	NA	NA	NA	NA	NA	---	NA	NA	hsa_circ_0016127	chr1	204100189	204110585	-	10396	1642	NM_018208	ETNK2
hsa_circ_0024000	0.00407321	11.3747	3.88372	4.15263	3.93671	P	P	P	0.178263	0.0926358	1.00699	A	A	A	hsa_circ_0024000	circRNA	ACCTGCAATGGATGGAAGTATGATGTGATGGATATAATTATGGGACACTGTGTGGGCACA	NA	NA	NA	NA	NA	NA	NA	NA	NA	NA	NA	---	NA	NA	hsa_circ_0024000	chr11	92085261	92577898	+	492637	11382	NM_001008781	FAT3
hsa_circ_0027584	0.00359974	11.336	4.94528	4.75762	4.65515	P	P	P	1.7925	0.895014	1.0022	A	A	A	hsa_circ_0027584	circRNA	TGAACTCAAAGAGATCTTTTAGCTGTGCCTAAGCATCCGTATGCTGCTATGGAGAACTGG	NA	NA	NA	NA	NA	NA	NA	NA	NA	NA	NA	Siglece	NA	NA	hsa_circ_0027584	chr12	72863537	73050788	+	187251	1751	NM_013381	TRHDE
hsa_circ_0006518	2.19304e-05	11.3112	7.08583	6.94062	7.21326	P	P	P	3.72294	3.63412	3.37412	P	P	P	hsa_circ_0006518	circRNA	CAATGCTGTGGGTTTTCAATTCAAAAACAGCTGAACTACTTAGTCATCATCAAGTAGAAA	NA	NA	NA	NA	NA	NA	NA	NA	NA	NA	NA	---	NA	NA	hsa_circ_0006518	chrX	30683627	30695569	+	11942	259	NM_001205019	GK
hsa_circ_0079585	0.000873713	11.2534	3.96578	3.57421	3.42094	P	P	P	0.0730355	0.254602	0.206283	A	A	A	hsa_circ_0079585	circRNA	TGCTTGCCAGAGCACTAGACAAACTGAATGGATTTCAGTTAGAGAATTTCACCTTGAAAG	NA	NA	NA	NA	NA	NA	NA	NA	NA	NA	NA	---	NA	NA	hsa_circ_0079585	chr7	23352353	23391205	-	38852	1240	NM_006547	IGF2BP3
hsa_circ_0073817	1.70609e-06	11.2056	6.77772	6.74412	6.93094	P	P	P	3.38358	3.37945	3.23322	P	P	P	hsa_circ_0073817	circRNA	CTGGTCTAAGGTGCTCCTGTTTCAGGATCAGAATTATGGTCTTCACTATGAATACACTAT	NA	NA	NA	NA	NA	NA	NA	NA	NA	NA	NA	---	NA	NA	hsa_circ_0073817	chr5	129019812	129040084	+	20272	648	NM_133638	ADAMTS19
hsa_circ_0080946	0.00617347	11.2021	4.3235	4.32887	4.47382	P	P	P	0.752216	0.341019	1.3862	A	A	A	hsa_circ_0080946	circRNA	AATTCCTTATCCACGGCCTGGTACAAATGATGTAGGAGGACAACGCAGCCTGATAAACAA	NA	NA	NA	NA	NA	NA	NA	NA	NA	NA	NA	LRRC37B	NA	NA	hsa_circ_0080946	chr7	84666204	84671601	-	5397	330	NM_152754	SEMA3D
hsa_circ_0079591	4.93713e-06	11.1438	3.55838	3.74429	3.70308	P	P	P	0.244953	0.123901	0.206283	A	A	A	hsa_circ_0079591	circRNA	GCTTCAATTAAGAGCACTAGACAAACTGAATGGATTTCAGTTAGAGAATTTCACCTTGAA	NA	NA	NA	NA	NA	NA	NA	NA	NA	NA	NA	---	NA	NA	hsa_circ_0079591	chr7	23358756	23391205	-	32449	919	NM_006547	IGF2BP3
hsa_circ_0085309	0.00706859	11.1183	5.62459	5.64692	5.53952	P	P	P	2.45197	1.45583	2.2965	A	A	A	hsa_circ_0085309	circRNA	GCTTCTATTTTGCCCACAGCTATTGTCAATAGGGGTCAGCTTTGGTGTACAACTACGAAG	NA	NA	NA	NA	NA	NA	NA	NA	NA	NA	NA	znf983	NA	NA	hsa_circ_0085309	chr8	106800945	106801152	+	207	207	NM_012082	ZFPM2
hsa_circ_0056923	3.40336e-05	10.9928	8.69551	8.55377	8.45466	P	P	P	5.05364	5.11144	5.17122	P	P	P	hsa_circ_0056923	circRNA	ATCCAAAGATGCTCTCCTTTGTGGTTTCAGCACAGATTCAGGGCCTGAAGACAATTGTAG	NA	NA	NA	NA	NA	NA	NA	NA	NA	NA	NA	LOC105612261	NA	NA	hsa_circ_0056923	chr2	167151108	167159812	-	8704	277	NM_002977	SCN9A
hsa_circ_0063579	3.6659e-06	10.9397	9.97521	9.80885	10.0333	P	P	P	6.57141	6.54058	6.35033	P	P	P	hsa_circ_0063579	circRNA	CTTCCTAACACTGGCAATAAACCCTCAACTGTGACCCACGACAGCCCGGGCCTCAGCTGG	NA	NA	NA	NA	NA	NA	NA	NA	NA	NA	NA	---	NA	NA	hsa_circ_0063579	chr22	41969658	41972670	+	3012	2057	NM_014460	CSDC2
hsa_circ_0063578	1.02604e-05	10.9129	9.73996	9.46149	9.72323	P	P	P	6.2795	6.27921	6.02384	P	P	P	hsa_circ_0063578	circRNA	TTCTTCCTAACACTGGCAATAAACCCTCAACTGTGACCCACGAGGGGCTGAGGTACCGCC	NA	NA	NA	NA	NA	NA	NA	NA	NA	NA	NA	---	NA	NA	hsa_circ_0063578	chr22	41957013	41972670	+	15657	2530	NM_014460	CSDC2
hsa_circ_0074575	5.3625e-05	10.8972	7.94266	7.54241	7.84436	P	P	P	4.42959	4.49879	4.05447	P	P	P	hsa_circ_0074575	circRNA	CAGCAGCTGAATGGACTGCCATGGTGGCATAAGTGGCACCATTTACGAGTACGGAGCCCT	NA	NA	NA	NA	NA	NA	NA	NA	NA	NA	NA	---	NA	NA	hsa_circ_0074575	chr5	150404900	150408554	+	3654	1457	NM_002084	GPX3
hsa_circ_0056924	0.0176336	10.8679	4.67913	4.57234	4.62342	P	P	P	0.39138	1.97718	0.646643	A	A	A	hsa_circ_0056924	circRNA	GAGAGCTTTGAAAACTATTTCTGTAATCCCAGGTATTTAACAGAATTTGTAAACCTAGGC	NA	NA	NA	NA	NA	NA	NA	NA	NA	NA	NA	LOC105612261	NA	NA	hsa_circ_0056924	chr2	167160747	167160839	-	92	92	NM_002977	SCN9A
hsa_circ_0073187	0.00149405	10.834	3.36953	3.69926	3.81737	P	P	P	0.190969	0.212778	0.206283	A	A	A	hsa_circ_0073187	circRNA	GACATCAGTCAGTGAAACAATCATGTTTCTTCATGAAATATTTCATCAAGGACTAAAGGC	NA	NA	NA	NA	NA	NA	NA	NA	NA	NA	NA	Hecw1	NA	NA	hsa_circ_0073187	chr5	80375939	80390811	+	14872	868	NM_006909	RASGRF2
hsa_circ_0037094	0.0118436	10.8184	4.34575	4.34316	4.56447	P	P	P	0.356029	1.69362	0.514154	A	A	A	hsa_circ_0037094	circRNA	AGTGTGTCGAATGATTCCTACGCCAGCTACGACGTGAACGGCAATGATTATGACCCATCT	NA	NA	NA	NA	NA	NA	NA	NA	NA	NA	NA	Ccdc93	NA	NA	hsa_circ_0037094	chr15	101853580	101970268	-	116688	2042	NM_002570	PCSK6
hsa_circ_0070350	5.95577e-05	10.8033	7.14483	6.84742	7.07656	P	P	P	3.36665	3.57373	3.81053	P	P	P	hsa_circ_0070350	circRNA	AGTGGAGGCGTGCCGCGTATGATGCTGTCCTTGACAGAAATGTGGCCATTAAGAAGCTCA	NA	NA	NA	NA	NA	NA	NA	NA	NA	NA	NA	---	NA	NA	hsa_circ_0070350	chr4	86985418	87028505	-	43087	874	NM_138980	MAPK10
hsa_circ_0079595	9.47252e-05	10.7921	5.43974	5.14142	4.99399	P	P	P	1.83128	1.45088	1.98289	A	A	A	hsa_circ_0079595	circRNA	GCAGTTTGAGTGAACACTGACTCGGAAACTGCAGTTGTAAATGTAACCTATTCCAGTAAG	NA	NA	NA	NA	NA	NA	NA	NA	NA	NA	NA	---	NA	NA	hsa_circ_0079595	chr7	23381682	23401216	-	19534	866	NM_006547	IGF2BP3
hsa_circ_0081053	0.0063971	10.6812	2.91935	4.21537	3.97798	P	P	P	0.101647	0.308592	0.688112	A	A	A	hsa_circ_0081053	circRNA	AAAGTTTTGTCTTGGGAAGTGTCTAAATGTTCTGAAGAAATAAAGAACTATATTGAAGAA	NA	NA	NA	NA	NA	NA	NA	NA	NA	NA	NA	---	NA	NA	hsa_circ_0081053	chr7	93555402	93555826	+	424	424	NM_004126	GNG11
hsa_circ_0006774	0.000205478	10.6639	10.4083	9.99867	10.0218	P	P	P	6.85057	6.61998	6.7427	P	P	P	hsa_circ_0006774	circRNA	TCTACAAGAGAAAGCAGAGAGAGACTCCCGTGAGCACGAGGAGCCCACCACCTCTGAGAT	NA	NA	NA	NA	NA	NA	NA	NA	NA	NA	NA	---	NA	NA	hsa_circ_0006774	chr2	217542834	217543802	-	968	350	NM_000599	IGFBP5
hsa_circ_0079599	9.24831e-05	10.6486	3.76655	3.73276	3.84495	P	P	P	0.464819	0.424536	0.206283	A	A	A	hsa_circ_0079599	circRNA	CGATATCTCCAGCACTAGACAAACTGAATGGATTTCAGTTAGAGAATTTCACCTTGAAAG	NA	NA	NA	NA	NA	NA	NA	NA	NA	NA	NA	---	NA	NA	hsa_circ_0079599	chr7	23385558	23391205	-	5647	540	NM_006547	IGF2BP3
hsa_circ_0027711	0.0160031	10.5508	9.2333	10.7032	10.4285	P	P	P	6.99126	6.82928	6.71064	P	P	P	hsa_circ_0027711	circRNA	CCCCTCTGCTAAATAAATATTAAAACTATCATGTGAGTTCCCTGGTTGTGAAAATACATG	NA	NA	NA	NA	NA	NA	NA	NA	NA	NA	NA	---	NA	NA	hsa_circ_0027711	chr12	91539034	91572362	-	33328	1913	NM_001920	DCN
hsa_circ_0016917	0.0100248	10.5331	4.88586	4.58513	4.58712	P	P	P	0.411588	1.35792	1.79677	A	A	A	hsa_circ_0016917	circRNA	TGAACAAGGGAGCACCAAAACTACTTTGGAATAGATGAAAACCTTGGTCCAGTAGCAGTC	NA	NA	NA	NA	NA	NA	NA	NA	NA	NA	NA	Mgll	NA	NA	hsa_circ_0016917	chr1	232626619	232629406	-	2787	323	NM_020808	SIPA1L2
hsa_circ_0090174	0.00276601	10.5303	7.02731	6.95985	7.17527	P	P	P	3.65186	3.20544	4.01267	P	P	P	hsa_circ_0090174	circRNA	AATGCGGAGGGTATGGAACAGGATGTTTCTTACTATGTAATACAGGCCATAAGTGTGTAT	NA	NA	NA	NA	NA	NA	NA	NA	NA	NA	NA	---	NA	NA	hsa_circ_0090174	chrX	30725672	30739112	+	13440	650	NM_001205019	GK
hsa_circ_0016913	0.00417553	10.4421	4.37512	4.03321	4.18562	P	P	P	0.841582	0.19849	1.23778	A	A	A	hsa_circ_0016913	circRNA	CTCATTCCAGATAGTGACGAGAGGCTGCGAGACTGTGGAAATGACCCTGAGGAGGAACGG	NA	NA	NA	NA	NA	NA	NA	NA	NA	NA	NA	MGEA5	NA	NA	hsa_circ_0016913	chr1	232574853	232596907	-	22054	1211	NM_020808	SIPA1L2
hsa_circ_0079222	2.18519e-05	10.4029	5.12184	4.97246	5.34269	P	P	P	1.5878	1.79908	1.91836	A	A	A	hsa_circ_0079222	circRNA	GAGAAGAGAGAACCAGGAGCTGTGGGACATCTGAGTTTCACAGAGATCTTGGACACATCT	NA	NA	NA	NA	NA	NA	NA	NA	NA	NA	NA	LOC524810	NA	NA	hsa_circ_0079222	chr7	4107469	4185548	+	78079	1512	NM_152744	SDK1
hsa_circ_0027583	0.000107907	10.3932	6.03327	6.08902	6.2459	P	P	P	2.62042	2.97199	2.62249	P	P	P	hsa_circ_0027583	circRNA	TACCTCTATCCTGGCTGGAACATGGTACGATTATATGCAAGACCTGATGCTATCAGAAGA	NA	NA	NA	NA	NA	NA	NA	NA	NA	NA	NA	Siglece	NA	NA	hsa_circ_0027583	chr12	72771774	72866960	+	95186	396	NM_013381	TRHDE
hsa_circ_0087951	0.000343111	10.3276	10.9106	10.8557	10.8101	P	P	P	7.29578	7.62336	7.53417	P	P	P	hsa_circ_0087951	circRNA	TAACTTCCAAAAAAACGTTTTGCAAACCACGGGTTCAAGTCCTTTGAGATGTTCTACAAA	NA	NA	NA	NA	NA	NA	NA	NA	NA	NA	NA	Pgap2	NA	NA	hsa_circ_0087951	chr9	113127528	113242036	-	114508	9641	NM_153366	SVEP1
hsa_circ_0026354	6.53332e-06	10.1243	8.32715	8.06309	8.23233	P	P	P	4.75114	4.87943	4.97625	P	P	P	hsa_circ_0026354	circRNA	CTCATCACCGGTCTAAGCCAGGCGAGGGCAAGCTCATCTTCTGCTCAGGCCTGGTGCTAC	NA	NA	NA	NA	NA	NA	NA	NA	NA	NA	NA	ANKRD27	NA	NA	hsa_circ_0026354	chr12	52451135	52451314	+	179	179	NM_002135	NR4A1
hsa_circ_0023995	0.000346457	10.0669	3.85065	3.39087	3.7009	P	P	P	0.314059	0.229869	0.433918	A	A	A	hsa_circ_0023995	circRNA	GACATAGTTGGATGGAAGTATGATGTGATGGATATAATTATGGGACACTGTGTGGGCACA	NA	NA	NA	NA	NA	NA	NA	NA	NA	NA	NA	---	NA	NA	hsa_circ_0023995	chr11	92085261	92498255	+	412994	4212	NM_001008781	FAT3
hsa_circ_0046834	0.0154099	10.0275	5.94868	7.4546	7.43312	P	P	P	4.08069	3.65327	3.50905	P	P	P	hsa_circ_0046834	circRNA	CTTCCAATCTACGTAAACTTAGGAAGACATGTAAGGAATTTGCATAAGACAGTTATGCAA	NA	NA	NA	NA	NA	NA	NA	NA	NA	NA	NA	---	NA	NA	hsa_circ_0046834	chr18	9117835	9134343	+	16508	762	NM_021074	NDUFV2
hsa_circ_0076696	4.97502e-05	9.98898	5.72381	5.69973	5.45534	P	P	P	2.23225	2.38938	2.30695	A	A	A	hsa_circ_0076696	circRNA	GGCAAAGCAGTATGGACCAATATTTACAGTCTTTGCTATGGGAAACCGAATGACCTTTGT	NA	NA	NA	NA	NA	NA	NA	NA	NA	NA	NA	---	NA	NA	hsa_circ_0076696	chr6	46593154	46610035	-	16881	754	NM_016593	CYP39A1
hsa_circ_0060920	5.33827e-05	9.97978	3.56598	3.30236	3.47787	P	P	P	0.107785	0.0845456	0.206283	A	A	A	hsa_circ_0060920	circRNA	TACGCCTCAGATTGTCCGCAAATACGACATCCAGGCCACAGACAATGAGCCTGTTGAGAT	NA	NA	NA	NA	NA	NA	NA	NA	NA	NA	NA	---	NA	NA	hsa_circ_0060920	chr20	52773707	52773828	-	121	121	NM_000782	CYP24A1
hsa_circ_0042539	0.000378209	9.90865	5.00623	4.86918	5.43157	P	P	P	1.66748	1.97907	1.77808	A	A	A	hsa_circ_0042539	circRNA	TTCTCTTCTGGGGCAGAACCTCTGGGAAACAGTACTGGGAGTACCAGTTCCAGCACCAGC	NA	NA	NA	NA	NA	NA	NA	NA	NA	NA	NA	Upf3b	NA	NA	hsa_circ_0042539	chr17	26695541	26695694	-	153	153	NM_000638	VTN
hsa_circ_0023530	1.42838e-05	9.79636	11.5696	11.2537	11.3847	P	P	P	8.10361	8.24518	7.98855	P	P	P	hsa_circ_0023530	circRNA	AGCCTAGCCCACTTGTCATCCATAAAGCAAGCTCAACCTTGGCACTGCGAAGCCCAGCTG	NA	NA	NA	NA	NA	NA	NA	NA	NA	NA	NA	TCEANC2	NA	NA	hsa_circ_0023530	chr11	73685715	73693889	-	8174	1646	NM_003355	UCP2
hsa_circ_0034337	0.0367085	9.78448	4.65396	6.72343	6.63658	P	P	P	2.68265	3.33254	2.81711	A	P	P	hsa_circ_0034337	circRNA	CTAAAGAGCAACTAATAAATTAAACCTATTCTTTCTGTGACTCGGTGCGCCTTCCGCGGA	NA	NA	NA	NA	NA	NA	NA	NA	NA	NA	NA	---	NA	NA	hsa_circ_0034337	chr15	33010204	33026870	+	16666	4138	NM_013372	GREM1
hsa_circ_0081878	6.27427e-05	9.76383	8.75558	8.45671	8.43292	P	P	P	5.24134	5.17515	5.38153	P	P	P	hsa_circ_0081878	circRNA	GAAAAGAAAGCTCCAGTAATAAACCGATTCACAAGGCGTGCCTCAGTATGTGCAGAAGCT	NA	NA	NA	NA	NA	NA	NA	NA	NA	NA	NA	Erich6	NA	NA	hsa_circ_0081878	chr7	106710725	106797494	+	86769	677	NM_002736	PRKAR2B
hsa_circ_0013059	9.95633e-06	9.75754	5.44965	5.62358	5.63428	P	P	P	2.14671	2.42164	2.27381	A	A	A	hsa_circ_0013059	circRNA	ATGAAGCTAATGAAGACGGTGATGACTGTCTTAGAAACTTTCCTTTGGCTCTGGACGCGT	NA	NA	NA	NA	NA	NA	NA	NA	NA	NA	NA	---	NA	NA	hsa_circ_0013059	chr1	85331067	85358896	-	27829	952	NM_012152	LPAR3
hsa_circ_0073195	1.92273e-05	9.74863	6.95874	6.74947	6.6719	P	P	P	3.60358	3.4048	3.52467	P	P	P	hsa_circ_0073195	circRNA	CATCAGTCAGCTAAAGGTTCTGGGCAAGTGTTTGGGCACCTGGATTTTAAAATAGTGGTG	NA	NA	NA	NA	NA	NA	NA	NA	NA	NA	NA	Hecw2	NA	NA	hsa_circ_0073195	chr5	80390674	80390811	+	137	137	NM_006909	RASGRF2
hsa_circ_0023997	0.00306085	9.71284	4.04792	3.86276	4.43546	P	P	P	0.318033	1.42181	0.58751	A	A	A	hsa_circ_0023997	circRNA	CCAGAAAGTGGATGGAAGTATGATGTGATGGATATAATTATGGGACACTGTGTGGGCACA	NA	NA	NA	NA	NA	NA	NA	NA	NA	NA	NA	---	NA	NA	hsa_circ_0023997	chr11	92085261	92539681	+	454420	9264	NM_001008781	FAT3
hsa_circ_0087707	5.13996e-05	9.70741	3.78066	3.51532	3.81132	P	P	P	0.635889	0.413839	0.206283	A	A	A	hsa_circ_0087707	circRNA	TTGCTGAAATGCTAATGCAGAGTCAAGTAAAACCTGGCTGAAGGGGAAATTCACTGAACT	NA	NA	NA	NA	NA	NA	NA	NA	NA	NA	NA	Sik3	NA	NA	hsa_circ_0087707	chr9	100854190	100862446	-	8256	490	NM_014788	TRIM14
hsa_circ_0058196	2.30797e-05	9.6935	10.6764	10.4898	10.6073	P	P	P	7.36229	7.30999	7.27496	P	P	P	hsa_circ_0058196	circRNA	AGCATTTATTTAATAAAGTTATGCATTCAGTTATGCAAACCTTCCCGTGGCCGCAAGCGT	NA	NA	NA	NA	NA	NA	NA	NA	NA	NA	NA	---	NA	NA	hsa_circ_0058196	chr2	217536827	217541605	-	4778	4778	NM_000599	IGFBP5
hsa_circ_0026353	0.000206028	9.66975	6.3115	6.38038	6.54029	P	P	P	3.15568	3.15887	3.10622	P	P	P	hsa_circ_0026353	circRNA	CTCATCACCGCGCACAGTGCAGAAAAACGCCAAGTACATCTGCCTGGCTAACAAGGACTG	NA	NA	NA	NA	NA	NA	NA	NA	NA	NA	NA	ANKRD27	NA	NA	hsa_circ_0026353	chr12	52449813	52451314	+	1501	664	NM_002135	NR4A1
hsa_circ_0024654	0.00840295	9.66403	3.7747	3.72853	2.83697	P	P	P	0.199363	0.29319	0.206283	A	A	A	hsa_circ_0024654	circRNA	TAAGCCATTCATGACTCTGGGAATTAGCATTCTTTACCGCGTTCATATGATCGGCCAGTG	NA	NA	NA	NA	NA	NA	NA	NA	NA	NA	NA	---	NA	NA	hsa_circ_0024654	chr11	120769240	120811169	+	41929	426	NM_014619	GRIK4
hsa_circ_0023978	1.09661e-05	9.6617	9.47825	9.17803	9.34681	P	P	P	6.1989	6.04987	5.94149	P	P	P	hsa_circ_0023978	circRNA	CGAAACCAAGGCCCAAACCTGCACCACTGACTGCTGAAATACAGCAAAAGATTTTGCATT	NA	NA	NA	NA	NA	NA	NA	NA	NA	NA	NA	---	NA	NA	hsa_circ_0023978	chr11	88033697	88033813	-	116	116	NM_001814	CTSC
hsa_circ_0060942	0.000201127	9.63816	3.56424	3.37226	3.55434	P	P	P	0.231407	0.254449	0.206283	A	A	A	hsa_circ_0060942	circRNA	AAGAATGCAGGGGATGAAGCTGTGAACTTCATCATGGCCATCAAAACAGACAGGAGGAAA	NA	NA	NA	NA	NA	NA	NA	NA	NA	NA	NA	---	NA	NA	hsa_circ_0060942	chr20	52782280	52790516	-	8236	1130	NM_000782	CYP24A1
hsa_circ_0026351	0.00861467	9.63338	5.97595	5.61942	5.75632	P	P	P	1.74071	2.49841	3.04532	A	P	P	hsa_circ_0026351	circRNA	CTCATCACCGGTAGGGTGCAGCCTGAGGCTTGTTCAGCAGAACAGGTGCAAGCCACATTG	NA	NA	NA	NA	NA	NA	NA	NA	NA	NA	NA	Ankrd27	NA	NA	hsa_circ_0026351	chr12	52446279	52451314	+	5035	1692	NM_002135	NR4A1
hsa_circ_0091321	0.00602906	9.6193	6.27696	7.17717	7.28744	P	P	P	3.51381	3.82193	3.78475	P	P	P	hsa_circ_0091321	circRNA	CGAGAAGCTGCAAATGCCAATTGAAATCACAGAAGATATTCGTGTTCTTCTTAAGAGAAA	NA	NA	NA	NA	NA	NA	NA	NA	NA	NA	NA	---	NA	NA	hsa_circ_0091321	chrX	108902582	108939425	-	36843	2229	NM_022977	ACSL4
hsa_circ_0027721	0.00460189	9.58915	4.14525	3.48664	3.15837	P	P	P	0.469207	0.492909	0.206283	A	A	A	hsa_circ_0027721	circRNA	TTATCTAACAGCTGGGAAAGAGAAAGAAGGGGATCAACCTGAAAGAGTCCAACCAATCGC	NA	NA	NA	NA	NA	NA	NA	NA	NA	NA	NA	Dhc93AB	NA	NA	hsa_circ_0027721	chr12	94562928	94575356	+	12428	276	NM_005761	PLXNC1
hsa_circ_0079584	0.00709634	9.58155	4.18673	3.91128	4.00352	P	P	P	1.29696	0.148088	0.659599	A	A	A	hsa_circ_0079584	circRNA	TTCATCATTTAGGTGCAGTGCTGGATAGTTTACTAGTCCAGTATGGAGTGGTGGAGAGCT	NA	NA	NA	NA	NA	NA	NA	NA	NA	NA	NA	---	NA	NA	hsa_circ_0079584	chr7	23349827	23401360	-	51533	3608	NM_006547	IGF2BP3
hsa_circ_0061106	0.0006183	9.57341	4.27486	3.65673	4.03404	P	P	P	0.574034	0.861164	0.803626	A	A	A	hsa_circ_0061106	circRNA	TACAACGAGGTCAACGTCACCCTGGACCTGGGCCAGGGCCAGTACTGTGACATCTGCACG	NA	NA	NA	NA	NA	NA	NA	NA	NA	NA	NA	---	NA	NA	hsa_circ_0061106	chr20	60937455	60937608	-	153	153	NM_005560	LAMA5
hsa_circ_0061708	0.00329788	9.5662	6.74093	6.58903	6.55196	P	P	P	2.94911	3.29659	3.75536	P	P	P	hsa_circ_0061708	circRNA	TGTTTATATAAGTTTTGGCACAGAGCAGGCGCCCTATGGAATGCAGACACAGAATTACCC	NA	NA	NA	NA	NA	NA	NA	NA	NA	NA	NA	---	NA	NA	hsa_circ_0061708	chr21	40190348	40196878	+	6530	2886	NM_005239	ETS2
hsa_circ_0042104	0.000595182	9.56438	5.69434	5.5643	5.30947	P	P	P	2.63615	1.96332	2.13459	P	A	A	hsa_circ_0042104	circRNA	CTCAGCTTAACTTCCACTGCAGAGAGGTCCATTCCAACTGCTCAGATGAAGCTGAAAAGA	NA	NA	NA	NA	NA	NA	NA	NA	NA	NA	NA	---	NA	NA	hsa_circ_0042104	chr17	12626163	12647753	+	21590	718	NM_001146312	MYOCD
hsa_circ_0074576	7.59535e-05	9.53825	10.0937	9.64316	10.0077	P	P	P	6.73704	6.85295	6.39329	P	P	P	hsa_circ_0074576	circRNA	CAGCAGCTGAGTATGTCCGACCAGGTGGAGGCTTTGTCCCTAATTTCCAGCTCTTTGAGA	NA	NA	NA	NA	NA	NA	NA	NA	NA	NA	NA	---	NA	NA	hsa_circ_0074576	chr5	150406992	150408554	+	1562	1185	NM_002084	GPX3
hsa_circ_0067840	0.00260134	9.53574	3.43542	4.0381	3.90411	P	P	P	0.104969	1.13627	0.206283	A	A	A	hsa_circ_0067840	circRNA	GTTGCAACCTTTATAGGTTTAGATAAGTTATGAGTTGCAGAAACGAATTGCTGAAATGGA	NA	NA	NA	NA	NA	NA	NA	NA	NA	NA	NA	Mtus2	NA	NA	hsa_circ_0067840	chr3	160131260	160138689	+	7429	1039	NM_005496	SMC4
hsa_circ_0005109	0.0101657	9.52557	4.02686	3.75476	4.1141	P	P	P	1.41004	0.182855	0.206283	A	A	A	hsa_circ_0005109	circRNA	TCTGGAGGAGTGGATTAAACTTCATTGACTTGATGGTGCGACAAGGGAATATTGACAACC	NA	NA	NA	NA	NA	NA	NA	NA	NA	NA	NA	TSPAN11	NA	NA	hsa_circ_0005109	chr16	77850817	77918699	+	67882	844	NM_020927	VAT1L
hsa_circ_0075146	0.000138485	9.4845	6.1949	5.87415	5.92046	P	P	P	2.82603	2.94948	2.45367	P	P	P	hsa_circ_0075146	circRNA	AGATGTGCTGGACTCCTTGACCTCCAGCAACGATGATGAGGACCCCAAGTCCCATAGGGA	NA	NA	NA	NA	NA	NA	NA	NA	NA	NA	NA	---	NA	NA	hsa_circ_0075146	chr5	176517745	176518809	+	1064	372	NM_213647	FGFR4
hsa_circ_0078048	0.00760489	9.47982	4.75626	4.55068	4.72362	P	P	P	1.94024	1.32747	0.817949	A	A	A	hsa_circ_0078048	circRNA	TAGCCACACAGGATGTAGGACCCCAAAGAAAAACTTTAGTGAGTTATGTGATGGCGTGCA	NA	NA	NA	NA	NA	NA	NA	NA	NA	NA	NA	---	NA	NA	hsa_circ_0078048	chr6	142729286	142759501	+	30215	1306	NM_020455	GPR126
hsa_circ_0081879	0.00170502	9.47871	8.75204	8.44838	8.34192	P	P	P	5.13601	4.84628	5.71809	P	P	P	hsa_circ_0081879	circRNA	TCAAGTTTGACTCCAGTAATAAACCGATTCACAAGGCGTGCCTCAGTATGTGCAGAAGCT	NA	NA	NA	NA	NA	NA	NA	NA	NA	NA	NA	ERLIN2	NA	NA	hsa_circ_0081879	chr7	106710725	106802256	+	91531	3179	NM_002736	PRKAR2B
hsa_circ_0023994	0.00019395	9.26276	3.75746	4.04021	3.784	P	P	P	0.505926	0.47439	0.936596	A	A	A	hsa_circ_0023994	circRNA	TTTTCTGGAGGATGGAAGTATGATGTGATGGATATAATTATGGGACACTGTGTGGGCACA	NA	NA	NA	NA	NA	NA	NA	NA	NA	NA	NA	---	NA	NA	hsa_circ_0023994	chr11	92085261	92430611	+	345350	3686	NM_001008781	FAT3
hsa_circ_0069732	0.00196224	9.25254	3.93135	3.69223	3.12837	P	P	P	0.507458	0.501597	0.206283	A	A	A	hsa_circ_0069732	circRNA	TTTGAAAAAGAGTCCATGAGAACAGCCTGAGCTGCAGTGAACAGCTGAATAGGTGCATTC	NA	NA	NA	NA	NA	NA	NA	NA	NA	NA	NA	hephl1a	NA	NA	hsa_circ_0069732	chr4	53731501	53733002	+	1501	1501	NM_023940	RASL11B
hsa_circ_0014228	3.15681e-05	9.21097	10.1261	9.80258	9.78599	P	P	P	6.82851	6.7879	6.4914	P	P	P	hsa_circ_0014228	circRNA	CAAGTTCAATAAAGATTCTTGGAAGTTTTGAATCCTGACTGCTGTCATGGCGTGCCCTCT	NA	NA	NA	NA	NA	NA	NA	NA	NA	NA	NA	LOC100653490	NA	NA	hsa_circ_0014228	chr1	153516094	153517285	-	1191	461	NM_019554	S100A4
hsa_circ_0078047	0.00159397	9.18717	5.71704	5.34647	5.36971	P	P	P	2.30179	1.7925	2.64613	A	A	P	hsa_circ_0078047	circRNA	GTATTTCCAGTTTTTACAATGCTACCAACCCATTGGTAACCTACTGGGGACCTGTTGATA	NA	NA	NA	NA	NA	NA	NA	NA	NA	NA	NA	---	NA	NA	hsa_circ_0078047	chr6	142723130	142725110	+	1980	448	NM_020455	GPR126
hsa_circ_0073194	0.00286485	8.99555	6.05796	5.9546	6.07367	P	P	P	2.5317	2.76681	3.20153	P	P	P	hsa_circ_0073194	circRNA	ATGAGTGACATCAGTCAGACAGGTGGGGTTCTGTCTCTAATAGACTGCACATTGATTGAG	NA	NA	NA	NA	NA	NA	NA	NA	NA	NA	NA	Hecw2	NA	NA	hsa_circ_0073194	chr5	80390114	80390811	+	697	204	NM_006909	RASGRF2
hsa_circ_0036523	0.00630381	8.98687	4.40538	5.63643	5.56179	P	P	P	1.99401	1.81543	2.49725	A	A	P	hsa_circ_0036523	circRNA	GTAATGGAATAAAGGATGCATGGATCAGAAGTATGGCGTGAGTCCCGAGAACATTATCCT	NA	NA	NA	NA	NA	NA	NA	NA	NA	NA	NA	---	NA	NA	hsa_circ_0036523	chr15	81041853	81047962	+	6109	1651	NM_021214	FAM108C1
hsa_circ_0078046	0.0142744	8.97531	4.22646	4.3719	4.32273	P	P	P	0.331549	1.01624	1.74032	A	A	A	hsa_circ_0078046	circRNA	GTATTTCCAGATGGAATTATCTATAGAATATCCGTAGTGATTCAGAACATCCTTCGTCAC	NA	NA	NA	NA	NA	NA	NA	NA	NA	NA	NA	---	NA	NA	hsa_circ_0078046	chr6	142711394	142725110	+	13716	905	NM_020455	GPR126
hsa_circ_0027782	0.000628244	8.89591	3.50022	3.48943	3.30034	P	P	P	0.131004	0.0855953	0.571167	A	A	A	hsa_circ_0027782	circRNA	TCTTAGTCAGTTTTCAGATGCTTCAAGTGTTGTGAACAGAGACTTGTTTGGATTATGCAT	NA	NA	NA	NA	NA	NA	NA	NA	NA	NA	NA	TOX3	NA	NA	hsa_circ_0027782	chr12	95926604	95928102	-	1498	1498	NM_032147	USP44
hsa_circ_0090172	0.000439494	8.8455	7.66254	7.67205	7.65281	P	P	P	4.44031	4.45111	4.65128	P	P	P	hsa_circ_0090172	circRNA	AATGCTGTGGATGGGTGGAACAGGACCCTAAGGAAATTCTACATTCTGTCTATGAGTGTA	NA	NA	NA	NA	NA	NA	NA	NA	NA	NA	NA	---	NA	NA	hsa_circ_0090172	chrX	30686128	30695569	+	9441	185	NM_001205019	GK
hsa_circ_0074574	0.000510258	8.80776	14.1596	13.8709	13.9535	P	P	P	10.8516	10.8926	10.8384	P	P	P	hsa_circ_0074574	circRNA	TTGAGACTCACCCCGTCTGCCCAGTAAAAGCCTTTCTGCAGCAGCTGAGTCGCCCCGGGA	NA	NA	NA	NA	NA	NA	NA	NA	NA	NA	NA	---	NA	NA	hsa_circ_0074574	chr5	150399998	150408554	+	8556	1761	NM_002084	GPX3
hsa_circ_0050140	0.0115977	8.80397	6.13831	7.23178	7.0348	P	P	P	3.70454	3.77459	3.72736	P	P	P	hsa_circ_0050140	circRNA	ATAAATGAGCTATTTAGGTGCTGTGATTGTGAAACACAGCTGTGATCAGTCCCCAGGATC	NA	NA	NA	NA	NA	NA	NA	NA	NA	NA	NA	---	NA	NA	hsa_circ_0050140	chr19	18704034	18710656	-	6622	1495	NM_004750	CRLF1
hsa_circ_0051120	3.9218e-05	8.78695	7.28494	7.14617	7.09906	P	P	P	4.21339	3.99003	3.9098	P	P	P	hsa_circ_0051120	circRNA	CAGGACTCAGGGTTACGAGGGGGCACGGGATGGGCGTCACTGCGTGGGTACGGGACTTCA	NA	NA	NA	NA	NA	NA	NA	NA	NA	NA	NA	---	NA	NA	hsa_circ_0051120	chr19	41123093	41131914	+	8821	952	NM_001042544	LTBP4
hsa_circ_0048028	0.0459509	8.76275	3.41284	5.52239	5.36581	P	P	P	1.72717	1.75301	2.16511	A	A	A	hsa_circ_0048028	circRNA	GAATCAATAAACCATTTGTGGATCCTGACTGCAGATAGCAAGGATGAAGAAGTCAAGGTT	NA	NA	NA	NA	NA	NA	NA	NA	NA	NA	NA	ENDOV	NA	NA	hsa_circ_0048028	chr18	77662419	77694022	-	31603	2035	NM_025078	PQLC1
hsa_circ_0016524	0.00200927	8.72911	7.1807	7.85481	7.75161	P	P	P	4.59699	4.35241	4.53608	P	P	P	hsa_circ_0016524	circRNA	TTGTCCTATGATGTAAATAAAAGCCTCGATTTATGTAATGTTAGGGGGCGCTGCGGCCCC	NA	NA	NA	NA	NA	NA	NA	NA	NA	NA	NA	---	NA	NA	hsa_circ_0016524	chr1	220863627	220872499	+	8872	2972	NM_024709	C1orf115
hsa_circ_0056922	0.0124453	8.6939	5.76486	5.63935	5.72503	P	P	P	2.6802	1.78989	3.03637	P	A	P	hsa_circ_0056922	circRNA	CAGCAAAGTGGTATTTAACAGAATTTGTAAACCTAGGCAATGTTTCAGCTCTTCGAACTT	NA	NA	NA	NA	NA	NA	NA	NA	NA	NA	NA	LOC105612261	NA	NA	hsa_circ_0056922	chr2	167128908	167160839	-	31931	2722	NM_002977	SCN9A
hsa_circ_0047667	7.62762e-05	8.68985	5.38987	4.94759	5.24649	P	P	P	1.92122	2.06081	2.25854	A	A	A	hsa_circ_0047667	circRNA	AACGAAACCAGATAAGCTCCACAAACCCAAAGCTACACAGACTGAGGTCAAACCATCTGT	NA	NA	NA	NA	NA	NA	NA	NA	NA	NA	NA	---	NA	NA	hsa_circ_0047667	chr18	47091686	47113220	+	21534	1384	NM_006033	LIPG
hsa_circ_0056640	0.0109404	8.6849	4.01149	3.952	3.97215	P	P	P	0.215836	0.734208	1.39022	A	A	A	hsa_circ_0056640	circRNA	ATTTCAAGAGAAAACTTTTCTTTACTGACTACGGGAATGTCGCCAAAGTGGAGAGATGTG	NA	NA	NA	NA	NA	NA	NA	NA	NA	NA	NA	---	NA	NA	hsa_circ_0056640	chr2	141607670	141819842	-	212172	3926	NM_018557	LRP1B
hsa_circ_0024738	0.0140534	8.65858	2.97397	4.64222	4.64122	P	P	P	1.61665	0.236585	1.28017	A	A	A	hsa_circ_0024738	circRNA	AGAAGTTAGGATCAACAGACAGAAACACAGAAATCTTGCATCACCATGGTGCACTTCTGT	NA	NA	NA	NA	NA	NA	NA	NA	NA	NA	NA	Upk2	NA	NA	hsa_circ_0024738	chr11	123988203	123995023	+	6820	1259	NM_001130142	VWA5A
hsa_circ_0003859	0.00108609	8.64779	6.9845	6.6087	6.96231	P	P	P	3.79338	3.71261	3.74126	P	P	P	hsa_circ_0003859	circRNA	AACTTCTGCTATGTGGATGAGTGCCAAGAATATGGTCCCGAGATTTGTGGAGCCCAGCGT	NA	NA	NA	NA	NA	NA	NA	NA	NA	NA	NA	---	NA	NA	hsa_circ_0003859	chr19	41122794	41125398	+	2604	404	NM_001042544	LTBP4
hsa_circ_0091278	5.598e-05	8.63679	6.10479	5.83487	5.7874	P	P	P	2.6829	2.86488	2.86111	P	P	P	hsa_circ_0091278	circRNA	GCCAAAGAATATGGTGATGGAGTTATGTGCAGCAGGTTCGGTCACTGATGTAGTGAGAAT	NA	NA	NA	NA	NA	NA	NA	NA	NA	NA	NA	ANXA4	NA	NA	hsa_circ_0091278	chrX	105137824	105190456	+	52632	3975	NM_198465	NRK
hsa_circ_0070186	0.00275562	8.61956	8.02185	7.89	7.90703	P	P	P	5.14902	4.79706	4.47482	P	P	P	hsa_circ_0070186	circRNA	TTTTTAGCCGAAAGACTGCATCGAGCCTTGAAGGAGCTGAAAGATGACTTGAAGGGTGAT	NA	NA	NA	NA	NA	NA	NA	NA	NA	NA	NA	---	NA	NA	hsa_circ_0070186	chr4	79503330	79522722	+	19392	591	NM_005139	ANXA3
hsa_circ_0027682	0.0152981	8.61351	4.10631	4.14122	4.29135	P	P	P	1.70082	0.242782	0.916315	A	A	A	hsa_circ_0027682	circRNA	ACATGCTCAGCATGGGGTAACCTTGGAAATGTTCTGAAGAGTCAGAGCAAAATTTCTGAA	NA	NA	NA	NA	NA	NA	NA	NA	NA	NA	NA	rsrc1	NA	NA	hsa_circ_0027682	chr12	83324209	83444797	+	120588	784	NM_152588	TMTC2
hsa_circ_0024001	0.000242464	8.59468	3.66652	3.65337	3.39402	P	P	P	0.279414	0.334884	0.756661	A	A	A	hsa_circ_0024001	circRNA	AATTCTGAAGGATGGAAGTATGATGTGATGGATATAATTATGGGACACTGTGTGGGCACA	NA	NA	NA	NA	NA	NA	NA	NA	NA	NA	NA	---	NA	NA	hsa_circ_0024001	chr11	92085261	92592488	+	507227	11675	NM_001008781	FAT3
hsa_circ_0023363	0.0170078	8.56971	9.16446	10.584	10.6484	P	P	P	7.36116	7.28173	6.82462	P	P	P	hsa_circ_0023363	circRNA	CATCTTTATATTAAACTTCCCCTGTTCAAATAAGGTCTGTACTTGGTGTACCACCCCGTG	NA	NA	NA	NA	NA	NA	NA	NA	NA	NA	NA	---	NA	NA	hsa_circ_0023363	chr11	71145456	71146885	-	1429	1429	NM_001360	DHCR7
hsa_circ_0026352	5.58308e-05	8.53401	7.21178	7.00233	7.19192	P	P	P	4.18806	3.83744	4.08776	P	P	P	hsa_circ_0026352	circRNA	TGGACTACTCCAAGAGATGCCCTGTATCCAAGCCCAATATGGGACACCAGCACCGAGTCC	NA	NA	NA	NA	NA	NA	NA	NA	NA	NA	NA	Ankrd27	NA	NA	hsa_circ_0026352	chr12	52448110	52450429	+	2319	1160	NM_002135	NR4A1
hsa_circ_0087954	0.00011302	8.46232	7.85585	7.37959	7.53644	P	P	P	4.33831	4.52099	4.68956	P	P	P	hsa_circ_0087954	circRNA	CCCATACCTGATGCCTGTGTGCAGCTGGCTTCACAGGATCACACTGTGAATTGAACATCA	NA	NA	NA	NA	NA	NA	NA	NA	NA	NA	NA	Pgap3	NA	NA	hsa_circ_0087954	chr9	113205824	113209337	-	3513	536	NM_153366	SVEP1
hsa_circ_0087953	0.000242404	8.44168	7.91271	7.34973	7.56781	P	P	P	4.43215	4.8791	4.2726	P	P	P	hsa_circ_0087953	circRNA	TTTTGTTCTGATGCCTGTGTGCAGCTGGCTTCACAGGATCACACTGTGAATTGAACATCA	NA	NA	NA	NA	NA	NA	NA	NA	NA	NA	NA	PGAP2	NA	NA	hsa_circ_0087953	chr9	113197520	113209337	-	11817	785	NM_153366	SVEP1
hsa_circ_0079732	0.00513534	8.40603	7.52227	7.43289	7.34472	P	P	P	4.71358	4.40391	3.84347	P	P	P	hsa_circ_0079732	circRNA	ACATGTGCCAGGCCTCCAAGGGGACACGCTGATTGACATTGGCTCAGGTCCTACCATCTA	NA	NA	NA	NA	NA	NA	NA	NA	NA	NA	NA	---	NA	NA	hsa_circ_0079732	chr7	30793349	30915271	+	121922	2330	NR_037598	INMT-FAM188B
hsa_circ_0087728	0.00352601	8.34594	6.32986	6.37104	6.39067	P	P	P	3.51264	3.42182	2.90283	P	P	P	hsa_circ_0087728	circRNA	ACATAAAGGAGAATTTGGCCTTCCCGGGCGACCTGGCGAGAAGGGAGAGCCGGGTGCCAT	NA	NA	NA	NA	NA	NA	NA	NA	NA	NA	NA	---	NA	NA	hsa_circ_0087728	chr9	101806849	101810121	+	3272	159	NM_001855	COL15A1
hsa_circ_0069799	0.00090863	8.33504	3.76335	3.40004	3.05967	P	P	P	0.333552	0.567748	0.206283	A	A	A	hsa_circ_0069799	circRNA	GGTTCATTTAAAATGGCATCCAACGCACTGGAGGAGCTTTGCTTTATGATTATGGGAATG	NA	NA	NA	NA	NA	NA	NA	NA	NA	NA	NA	4930428D20Rik	NA	NA	hsa_circ_0069799	chr4	56465308	56475346	-	10038	310	NM_006681	NMU
hsa_circ_0073196	9.60985e-05	8.29915	6.90003	6.65867	6.92657	P	P	P	3.82753	3.52734	3.95374	P	P	P	hsa_circ_0073196	circRNA	ATATCCTCAGCTAAAGGTTCTGGGCAAGTGTTTGGGCACCTGGATTTTAAAATAGTGGTG	NA	NA	NA	NA	NA	NA	NA	NA	NA	NA	NA	Heg1	NA	NA	hsa_circ_0073196	chr5	80390674	80497261	+	106587	1288	NM_006909	RASGRF2
hsa_circ_0087952	0.000287026	8.29739	7.89515	7.45375	7.54754	P	P	P	4.72486	4.52113	4.52108	P	P	P	hsa_circ_0087952	circRNA	TCCTGCCTTGATGCCTGTGTGCAGCTGGCTTCACAGGATCACACTGTGAATTGAACATCA	NA	NA	NA	NA	NA	NA	NA	NA	NA	NA	NA	PGAP2	NA	NA	hsa_circ_0087952	chr9	113194741	113209337	-	14596	1130	NM_153366	SVEP1
hsa_circ_0013062	0.000499809	8.25571	3.13377	3.38299	3.10572	P	P	P	0.142423	0.15323	0.206283	A	A	A	hsa_circ_0013062	circRNA	GATTGTCTTAGGACCATACCATGACAAGATTGTGTTCAATTAGACCTTCAGGACCTCTCC	NA	NA	NA	NA	NA	NA	NA	NA	NA	NA	NA	---	NA	NA	hsa_circ_0013062	chr1	85403437	85418213	-	14776	770	NM_153259	MCOLN2
hsa_circ_0037103	0.00122061	8.19214	3.56278	3.40691	3.77434	P	P	P	0.85673	0.117507	0.596189	A	A	A	hsa_circ_0037103	circRNA	ACAATGCCAAAATAGGATGATTCCTACGCCAGCTACGACGTGAACGGCAATGATTATGAC	NA	NA	NA	NA	NA	NA	NA	NA	NA	NA	NA	Ccdc93	NA	NA	hsa_circ_0037103	chr15	101968096	101970268	-	2172	166	NM_002570	PCSK6
hsa_circ_0073815	3.20159e-05	8.11723	7.38829	7.25046	7.23531	P	P	P	4.41572	4.13854	4.24824	P	P	P	hsa_circ_0073815	circRNA	GTGGTCTGAGCTCTCCGAGATGCTGGCAAACAGTCTATTAATAGTGACTGGAAGATTGAA	NA	NA	NA	NA	NA	NA	NA	NA	NA	NA	NA	---	NA	NA	hsa_circ_0073815	chr5	129015456	129037285	+	21829	653	NM_133638	ADAMTS19
hsa_circ_0015068	2.8064e-06	8.02355	8.61909	8.50407	8.67474	P	P	P	5.66553	5.53993	5.58209	P	P	P	hsa_circ_0015068	circRNA	GGGCATCAGTGCGGAAGAGACGGAATTTCAACAAGCAAGCGACAGAAATCCTGAATGAAT	NA	NA	NA	NA	NA	NA	NA	NA	NA	NA	NA	calm1	NA	NA	hsa_circ_0015068	chr1	164776778	164790863	+	14085	499	NM_002585	PBX1
hsa_circ_0078044	0.00535656	7.98235	6.1722	6.31323	6.37458	P	P	P	2.73617	3.60186	3.40412	A	P	P	hsa_circ_0078044	circRNA	CTCGGATATGTTGCCGTGTCCTTAAGGAATCAAAAGGTCATTTTACCCCAGACATCAGAT	NA	NA	NA	NA	NA	NA	NA	NA	NA	NA	NA	---	NA	NA	hsa_circ_0078044	chr6	142691306	142721733	+	30427	1234	NM_020455	GPR126
hsa_circ_0079601	0.0106863	7.96356	2.73177	3.75262	2.98182	P	P	P	0.222763	0.260637	0.206283	A	A	A	hsa_circ_0079601	circRNA	TATTCCAGTAAGGACCAAGCTAGACAGTAAAATAGAACTGCACGGGAAACCCATAGAAGT	NA	NA	NA	NA	NA	NA	NA	NA	NA	NA	NA	---	NA	NA	hsa_circ_0079601	chr7	23401152	23508161	-	107009	226	NM_006547	IGF2BP3
hsa_circ_0001128	0.00117101	7.92921	6.24598	6.11435	6.19118	P	P	P	3.31678	3.33227	2.90457	P	P	P	hsa_circ_0001128	circRNA	AGGCACCCAGGGCAGAAACGTCTCCACCAAAAAAGTCCACCTTCCTTTGGAGGCACCAAC	NA	NA	NA	NA	NA	NA	NA	NA	NA	NA	NA	hephl1a	NA	NA	hsa_circ_0001128	chr20	4763319	4763528	+	209	209	NM_014737	RASSF2
hsa_circ_0027727	0.00642236	7.84465	4.79891	4.69941	4.4369	P	P	P	1.12953	2.22381	1.46589	A	A	A	hsa_circ_0027727	circRNA	TAAACACCATTGGCCACTATGAGAGCTTCAAATGGGCACACGACAGAAAGAACTTCTGGA	NA	NA	NA	NA	NA	NA	NA	NA	NA	NA	NA	Dhcr7	NA	NA	hsa_circ_0027727	chr12	94676073	94676177	+	104	104	NM_005761	PLXNC1
hsa_circ_0078041	0.00674416	7.80412	7.04011	6.8312	6.71202	P	P	P	4.33468	3.2491	3.92629	P	P	P	hsa_circ_0078041	circRNA	TCTCGGATATGTGTGGGGATGTGCCAACTGCCGAGTGGTTTTGTCCAACCCTTCTGGGAC	NA	NA	NA	NA	NA	NA	NA	NA	NA	NA	NA	---	NA	NA	hsa_circ_0078041	chr6	142688705	142721733	+	33028	1576	NM_020455	GPR126
hsa_circ_0079596	5.98583e-05	7.7882	5.19246	4.89221	5.09106	P	P	P	2.00814	2.11589	2.17868	A	A	A	hsa_circ_0079596	circRNA	GCAGTTTGAGGTGCTGGATAGTTTACTAGTCCAGTATGGAGTGGTGGAGAGCTGTGAGCA	NA	NA	NA	NA	NA	NA	NA	NA	NA	NA	NA	---	NA	NA	hsa_circ_0079596	chr7	23381682	23401360	-	19678	918	NM_006547	IGF2BP3
hsa_circ_0046048	0.00815703	7.77984	3.78569	3.4358	3.65373	P	P	P	0.280439	1.2709	0.206283	A	A	A	hsa_circ_0046048	circRNA	TAAAGAGTGGAGAAAGACTGTGGCCAAGTTGCCTTTTGTCATCAATGATGGCAAGTGGCA	NA	NA	NA	NA	NA	NA	NA	NA	NA	NA	NA	Angptl6	NA	NA	hsa_circ_0046048	chr17	78440632	78445711	-	5079	4382	NM_002522	NPTX1
hsa_circ_0018880	0.00012733	7.76359	11.3354	11.0615	11.2294	P	P	P	8.30588	8.19201	8.26903	P	P	P	hsa_circ_0018880	circRNA	AACGACATTGTGATTACCCAAAGAAGGAGGACTACATCGTCTACCTGGGTCGCTCAAGGC	NA	NA	NA	NA	NA	NA	NA	NA	NA	NA	NA	CYP2C19	NA	NA	hsa_circ_0018880	chr10	75673737	75673886	+	149	149	NM_001145031	PLAU
hsa_circ_0023366	0.0233489	7.76161	9.03921	10.4277	10.3787	P	P	P	7.22911	7.0414	7.07698	P	P	P	hsa_circ_0023366	circRNA	CATCTTTATATTAAACTTCCCCTGTTCAAATAAGGAGGTGGACTGGTTTTCACTGGCGAG	NA	NA	NA	NA	NA	NA	NA	NA	NA	NA	NA	---	NA	NA	hsa_circ_0023366	chr11	71145456	71155261	-	9805	2294	NM_001360	DHCR7
hsa_circ_0091317	0.00506382	7.76025	3.54036	3.29391	3.46481	P	P	P	0.960423	0.119392	0.206283	A	A	A	hsa_circ_0091317	circRNA	TTGTAAGGATTAAACCTCAGTCAGAAACGCTGAAAGCAGGAGACTTGAGGACACGAATTA	NA	NA	NA	NA	NA	NA	NA	NA	NA	NA	NA	---	NA	NA	hsa_circ_0091317	chrX	107939526	107940775	+	1249	1249	NM_033380	COL4A5
hsa_circ_0057549	0.00944922	7.72871	5.02943	4.67204	4.94731	P	P	P	2.49159	1.22819	1.8276	A	A	A	hsa_circ_0057549	circRNA	AGTGAGATACTTGTGGTGTCAGAAGGATCATGTGCCACAGGCAGAGCTCGAGAGGCGGCT	NA	NA	NA	NA	NA	NA	NA	NA	NA	NA	NA	Rnf165	NA	NA	hsa_circ_0057549	chr2	193049079	193059644	-	10565	806	NM_016192	TMEFF2
hsa_circ_0073810	0.00351123	7.69398	2.79397	3.21612	3.46003	P	P	P	0.199557	0.307352	0.206283	A	A	A	hsa_circ_0073810	circRNA	GTGGATGCAGCTATACTTATAACAAGATAAAGGAAGACCTAGGTCTAGAAAAATAGCAGA	NA	NA	NA	NA	NA	NA	NA	NA	NA	NA	NA	---	NA	NA	hsa_circ_0073810	chr5	128861976	128864370	+	2394	415	NM_133638	ADAMTS19
hsa_circ_0027585	0.00340608	7.6647	2.8651	2.88785	3.45229	P	P	P	0.172797	0.0886294	0.206283	A	A	A	hsa_circ_0027585	circRNA	CAATTAATCCGGAATCATGAGGATTATTTAACCATTCATAAGTATGGTAATGCAGCCAGA	NA	NA	NA	NA	NA	NA	NA	NA	NA	NA	NA	Siglece	NA	NA	hsa_circ_0027585	chr12	72955944	72969168	+	13224	477	NM_013381	TRHDE
hsa_circ_0008270	0.00533037	7.62521	8.80871	9.56691	9.45438	P	P	P	6.30507	6.45488	6.3834	P	P	P	hsa_circ_0008270	circRNA	TCTCATCAACTGGGAACCGGGGGATTGGGCACCTGCTCTGTAAAGATGAGCTGCTGAAGG	NA	NA	NA	NA	NA	NA	NA	NA	NA	NA	NA	---	NA	NA	hsa_circ_0008270	chr14	91655253	91666249	+	10996	510	NM_001102366	C14orf159
hsa_circ_0079213	0.0112972	7.5975	3.78281	3.75033	3.94477	P	P	P	1.40959	0.847549	0.206283	A	A	A	hsa_circ_0079213	circRNA	TACTGGGCTACAAGATGATGTTGCTCCATATTTTAAAACGGAGCCAGGCCTACCACAGAT	NA	NA	NA	NA	NA	NA	NA	NA	NA	NA	NA	LOC523427	NA	NA	hsa_circ_0079213	chr7	3658711	4167128	+	508417	3641	NM_152744	SDK1
hsa_circ_0082021	0.00646418	7.58402	5.44121	5.44548	5.32009	P	P	P	1.91988	2.67331	2.71796	A	P	P	hsa_circ_0082021	circRNA	AGCACTGAAGAAAAAAGAGTTTGATGTGGATACTCTCAGTAAATCCGAGCTGCGGATGCT	NA	NA	NA	NA	NA	NA	NA	NA	NA	NA	NA	---	NA	NA	hsa_circ_0082021	chr7	117364600	117501370	-	136770	4366	NM_033427	CTTNBP2
hsa_circ_0070187	0.000518922	7.5454	7.96341	8.11394	7.81908	P	P	P	5.26563	5.12358	4.72206	P	P	P	hsa_circ_0070187	circRNA	TTAAAAGTAATCGGATACTTCTGGAGACTATGAAATCACACTCTTAAAAATCTGTGGTGG	NA	NA	NA	NA	NA	NA	NA	NA	NA	NA	NA	---	NA	NA	hsa_circ_0070187	chr4	79531209	79531605	+	396	396	NM_005139	ANXA3
hsa_circ_0061176	0.0270066	7.52332	3.9577	3.71028	3.77743	P	P	P	0.131974	0.156011	1.77304	A	A	A	hsa_circ_0061176	circRNA	TGTGTGTCCGAGTCTGTAGAAGAGGCGACACCAGGGCTTCCAAATGAACAACCGAAAGGA	NA	NA	NA	NA	NA	NA	NA	NA	NA	NA	NA	zgc:174574	NA	NA	hsa_circ_0061176	chr20	62378224	62422143	-	43919	1861	NM_025224	ZBTB46
hsa_circ_0022194	0.0099938	7.51333	4.24824	4.08059	4.0573	P	P	P	0.499412	1.50293	1.45906	A	A	A	hsa_circ_0022194	circRNA	AAGGGAGAAAAGATGGAAGTTTGCAGTGTCCAACCTGCAAGACCATTTATGGGGTGAAGA	NA	NA	NA	NA	NA	NA	NA	NA	NA	NA	NA	---	NA	NA	hsa_circ_0022194	chr11	58962680	58967246	+	4566	252	NM_015177	DTX4
hsa_circ_0087440	0.000223332	7.50886	7.34524	6.98607	7.1077	P	P	P	4.48834	4.24614	3.95272	P	P	P	hsa_circ_0087440	circRNA	ACTCCGGACTCCAAACAGGGAAGCCATCAGCCGCGTCTGTGAAGCTGTGCCTGGTGCGAA	NA	NA	NA	NA	NA	NA	NA	NA	NA	NA	NA	Mgam	NA	NA	hsa_circ_0087440	chr9	91690023	91692818	-	2795	184	NM_016848	SHC3
hsa_circ_0083945	0.000140261	7.4604	4.29417	3.92987	3.79796	P	P	P	1.16452	0.862492	1.30874	A	A	A	hsa_circ_0083945	circRNA	CATGATGAAGTCATGTCTCACAAGAGAACAGCGAGTACGGATCTTAAGCAACTGAACCAG	NA	NA	NA	NA	NA	NA	NA	NA	NA	NA	NA	GNAI2	NA	NA	hsa_circ_0083945	chr8	37727937	37732840	-	4903	2819	NM_001002814	RAB11FIP1
hsa_circ_0015500	0.0140715	7.45132	10.5484	11.5817	11.7241	P	P	P	8.53785	8.55084	8.32038	P	P	P	hsa_circ_0015500	circRNA	GAGGTGTGTGGAATAAATTATTTTTGTTAAGGCAAGTGGCTCTGGACCTGTCCCAGCACA	NA	NA	NA	NA	NA	NA	NA	NA	NA	NA	NA	Gm9079	NA	NA	hsa_circ_0015500	chr1	180151308	180167169	+	15861	2635	NM_002826	QSOX1
hsa_circ_0079212	0.0160008	7.44793	4.45841	4.52846	4.67302	P	P	P	2.26945	1.50431	0.861766	A	A	A	hsa_circ_0079212	circRNA	AGCATAGCAAATGATGTTGCTCCATATTTTAAAACGGAGCCAGGCCTACCACAGATCCAC	NA	NA	NA	NA	NA	NA	NA	NA	NA	NA	NA	LOC516108	NA	NA	hsa_circ_0079212	chr7	3658711	3861215	+	202504	549	NM_152744	SDK1
hsa_circ_0072490	0.0020586	7.41415	8.90125	9.6527	9.77371	P	P	P	6.94096	6.72829	5.9594	P	P	P	hsa_circ_0072490	circRNA	TACTGCATGCTGTTTGTGGCACTGGATTGCCTTTTGCAATTCTTACTTCAAGGCATACCC	NA	NA	NA	NA	NA	NA	NA	NA	NA	NA	NA	Dusp22	NA	NA	hsa_circ_0072490	chr5	54737678	54771278	-	33600	491	NM_003711	PPAP2A
hsa_circ_0044705	0.000401943	7.40774	9.44648	9.38553	9.393	P	P	P	6.57985	6.60812	6.35795	P	P	P	hsa_circ_0044705	circRNA	ATTTCTTCATTGCTGCTTCTTATGCTCCATGGTTCATGAACCATCGAGCTCCAGCCAATG	NA	NA	NA	NA	NA	NA	NA	NA	NA	NA	NA	---	NA	NA	hsa_circ_0044705	chr17	53485106	53491593	-	6487	318	NM_012329	MMD
hsa_circ_0024695	0.031359	7.38138	4.88593	4.84412	4.63312	P	P	P	2.03192	0.585684	2.50296	A	A	P	hsa_circ_0024695	circRNA	GATGACCTGGGTGCAGATGCATCTGCAACGCAGGCTGCCAGATCTACGGATGTTGCTGCT	NA	NA	NA	NA	NA	NA	NA	NA	NA	NA	NA	NIT1	NA	NA	hsa_circ_0024695	chr11	121498263	121498476	+	213	213	NM_003105	SORL1
hsa_circ_0077260	8.67506e-05	7.37863	7.41302	7.37222	7.28151	P	P	P	4.52509	4.57109	4.31043	P	P	P	hsa_circ_0077260	circRNA	TTAAATCATCATTCAAATTGCCCAGAATGCACGCTACAGGAAAACCCATTCTTCTCCCAG	NA	NA	NA	NA	NA	NA	NA	NA	NA	NA	NA	---	NA	NA	hsa_circ_0077260	chr6	87795215	87796152	-	937	521	NM_001252383	CGA
hsa_circ_0017431	0.0196351	7.36869	3.77727	5.26828	5.15147	P	P	P	1.8226	2.3015	1.78555	A	A	A	hsa_circ_0017431	circRNA	TATTTCTTGCAAAGTTAAGTTCCTCCAGAAGAAATTAATTATTTAACACGAATTCACTAC	NA	NA	NA	NA	NA	NA	NA	NA	NA	NA	NA	---	NA	NA	hsa_circ_0017431	chr10	1085963	1087444	-	1481	1481	NM_004508	IDI1
hsa_circ_0061706	0.00234257	7.36363	7.5207	7.47581	7.58057	P	P	P	4.87334	4.32385	4.68763	P	P	P	hsa_circ_0061706	circRNA	ATGATCAAAGATGAATGATTTCGGAATCAAGAATATGGACCAGGTAGCCCCTGTGGCTAA	NA	NA	NA	NA	NA	NA	NA	NA	NA	NA	NA	---	NA	NA	hsa_circ_0061706	chr21	40181958	40186905	+	4947	505	NM_005239	ETS2
hsa_circ_0086604	0.000137658	7.34736	6.99885	6.79244	6.90902	P	P	P	3.98553	3.84647	4.21921	P	P	P	hsa_circ_0086604	circRNA	GAATCTCAAGCATGCCACCCTGGTTTTTACGGGCCAGATTGTAAGCTTAGGTGCAGCTGC	NA	NA	NA	NA	NA	NA	NA	NA	NA	NA	NA	PTTG1IP	NA	NA	hsa_circ_0086604	chr9	27180237	27203117	+	22880	1308	NM_000459	TEK
hsa_circ_0066444	0.00149951	7.3075	6.82594	6.65097	6.66147	P	P	P	4.1622	3.64163	3.67193	P	P	P	hsa_circ_0066444	circRNA	TTGGAGCTCGTGTTCCAGTACCTGTGCTGGCGGATCCCAGCGGCGTGTTGTTGTATGTCA	NA	NA	NA	NA	NA	NA	NA	NA	NA	NA	NA	---	NA	NA	hsa_circ_0066444	chr3	64579933	64582667	-	2734	339	NM_182920	ADAMTS9
hsa_circ_0003300	0.00164143	7.30364	3.99374	4.33495	4.09634	P	P	P	1.40744	1.52135	0.818122	A	A	A	hsa_circ_0003300	circRNA	TGTCTCACAGTATAAATCAATGAGGAAGAGTTCAAGTGGCAATGAAAATGATGAGCAAGA	NA	NA	NA	NA	NA	NA	NA	NA	NA	NA	NA	---	NA	NA	hsa_circ_0003300	chrX	114357089	114364762	-	7673	483	NM_020871	LRCH2
hsa_circ_0032857	0.00386333	7.28735	3.33573	2.65089	2.93257	P	P	P	0.0901264	0.106701	0.206283	A	A	A	hsa_circ_0032857	circRNA	ATGATATCAGCGCTTGGTTTCAGTTGGACTTGATTCAAAGAATGCAGTTTGTGTTTGGGA	NA	NA	NA	NA	NA	NA	NA	NA	NA	NA	NA	---	NA	NA	hsa_circ_0032857	chr14	89087097	89212627	-	125530	5018	NM_183387	EML5
hsa_circ_0051116	0.00155734	7.28057	8.44265	8.03925	8.38738	P	P	P	5.39782	5.44387	5.46678	P	P	P	hsa_circ_0051116	circRNA	TTGCAGCAACGGCTACTACTACCACACACAGCGGCTGGAGTGCATCATGCCGAGGCCTGG	NA	NA	NA	NA	NA	NA	NA	NA	NA	NA	NA	---	NA	NA	hsa_circ_0051116	chr19	41103140	41129637	+	26497	3885	NM_001042544	LTBP4
hsa_circ_0012901	0.000312164	7.27735	6.559	6.68045	6.61664	P	P	P	3.62706	3.68465	3.93748	P	P	P	hsa_circ_0012901	circRNA	CCCACAGTTGTTCTTTTAGATCAGCCTGAGATATGGGGTTCAGGCCAACCAATTAATCCA	NA	NA	NA	NA	NA	NA	NA	NA	NA	NA	NA	Me3	NA	NA	hsa_circ_0012901	chr1	67142686	67155999	+	13313	924	NM_032291	SGIP1
hsa_circ_0069767	0.00700634	7.24611	5.14535	5.0676	5.13686	P	P	P	1.74079	2.3187	2.5938	A	A	P	hsa_circ_0069767	circRNA	ATATTTACAGATAAAGGATTCATTAATATCTTCCCCATGATAAACACTACAGTATTTGTA	NA	NA	NA	NA	NA	NA	NA	NA	NA	NA	NA	---	NA	NA	hsa_circ_0069767	chr4	55573263	55593490	+	20227	722	NM_000222	KIT
hsa_circ_0060838	0.0145355	7.22683	5.0351	4.3715	4.58828	P	P	P	2.19987	2.15616	0.746899	A	A	A	hsa_circ_0060838	circRNA	ATAAAGGCTATTTGGAGCTGAATTTCGTCGGTTTTCGCTGGAAAGATCAAAACCTGGAAA	NA	NA	NA	NA	NA	NA	NA	NA	NA	NA	NA	C6H5orf51	NA	NA	hsa_circ_0060838	chr20	49354393	49370278	+	15885	4306	NM_032521	PARD6B
hsa_circ_0061152	0.00984787	7.21326	10.3419	11.3086	11.297	P	P	P	8.16908	8.07616	8.33398	P	P	P	hsa_circ_0061152	circRNA	CGTCTCCAAGGTTCCTCCTGGTTTTCTCCTGCCTCGTGCTGTCTGTGTTTTCCACCATCA	NA	NA	NA	NA	NA	NA	NA	NA	NA	NA	NA	---	NA	NA	hsa_circ_0061152	chr20	62055529	62078190	-	22661	951	NM_172107	KCNQ2
hsa_circ_0025433	0.00610829	7.16587	3.7464	3.85552	3.63694	P	P	P	0.820746	0.416291	1.33808	A	A	A	hsa_circ_0025433	circRNA	TGGTGGTAAAATTCCACTAGTATACATTCAGGATCCCAAAGGAAATCGCATCGCACAATG	NA	NA	NA	NA	NA	NA	NA	NA	NA	NA	NA	---	NA	NA	hsa_circ_0025433	chr12	9246060	9262930	-	16870	1757	NM_000014	A2M
hsa_circ_0045305	0.000942263	7.14905	9.38226	9.66125	9.17081	P	P	P	6.66584	6.49078	6.58131	P	P	P	hsa_circ_0045305	circRNA	ACACAGCACACACCTTTTCTCTAAGAAGTAATGGTGCTCCTTGTCTTCTGAGATGTTGGG	NA	NA	NA	NA	NA	NA	NA	NA	NA	NA	NA	---	NA	NA	hsa_circ_0045305	chr17	62515438	62515554	+	116	116	NM_138363	CEP95
hsa_circ_0075824	0.000438461	7.14873	3.44345	2.84108	3.40699	P	P	P	0.273859	0.718252	0.206283	A	A	A	hsa_circ_0075824	circRNA	CCTGAGACGAGTGTGAATCATGGCAATACAGTGAAAGACAGTGATTTACTGCTTTTGAGG	NA	NA	NA	NA	NA	NA	NA	NA	NA	NA	NA	---	NA	NA	hsa_circ_0075824	chr6	21909700	21909834	+	134	134	NR_015410	LINC00340
hsa_circ_0066443	7.57573e-05	7.14869	6.67855	6.36859	6.62077	P	P	P	3.64664	3.6889	3.83124	P	P	P	hsa_circ_0066443	circRNA	ATGGCAAGAATGTTCCAGTACCTGTGCTGGCGGATCCCAGCGGCGTGTTGTTGTATGTCA	NA	NA	NA	NA	NA	NA	NA	NA	NA	NA	NA	---	NA	NA	hsa_circ_0066443	chr3	64547253	64582667	-	35414	681	NM_182920	ADAMTS9
hsa_circ_0023998	0.0157493	7.14736	3.38103	3.64004	3.56458	P	P	P	0.105903	0.230747	1.38277	A	A	A	hsa_circ_0023998	circRNA	CCCGACATTGGATGGAAGTATGATGTGATGGATATAATTATGGGACACTGTGTGGGCACA	NA	NA	NA	NA	NA	NA	NA	NA	NA	NA	NA	---	NA	NA	hsa_circ_0023998	chr11	92085261	92543242	+	457981	9498	NM_001008781	FAT3
hsa_circ_0010419	1.36675e-06	7.13019	12.4551	12.5486	12.602	P	P	P	9.69381	9.64543	9.76583	P	P	P	hsa_circ_0010419	circRNA	CTGTGTCTCATTGTTATTGAAGATGATAGGATTGATGACGTGCTGAAAAATATGACCGAC	NA	NA	NA	NA	NA	NA	NA	NA	NA	NA	NA	---	NA	NA	hsa_circ_0010419	chr1	20808883	20810212	-	1329	1329	NM_018584	CAMK2N1
hsa_circ_0088344	0.000174338	7.11194	10.1293	9.8246	9.8933	P	P	P	7.08889	7.07578	7.20622	P	P	P	hsa_circ_0088344	circRNA	TTCACTAATAGTTATTGCAGCCGAAGGAGAAATGAATGCATCCAGGGCTCTGAAAGAAGC	NA	NA	NA	NA	NA	NA	NA	NA	NA	NA	NA	Pax8	NA	NA	hsa_circ_0088344	chr9	124101352	124103686	-	2334	2334	NM_004099	STOM
hsa_circ_0000354	0.000513314	7.08851	10.1331	9.87213	9.7405	P	P	P	7.13736	7.14428	7.01184	P	P	P	hsa_circ_0000354	circRNA	TAATATGCAAGACTCTCAAGGAGTACTTTCTTCCTTTCCAGCTCTTCAGGCAGTGCAGGA	NA	NA	NA	NA	NA	NA	NA	NA	NA	NA	NA	---	NA	NA	hsa_circ_0000354	chr11	104903790	104912446	-	8656	7575	NM_033292	CASP1
hsa_circ_0051121	9.09741e-07	7.07537	8.00002	7.86674	7.96754	P	P	P	5.15856	5.15776	5.05022	P	P	P	hsa_circ_0051121	circRNA	AACTTCTGCTGATGTGAACGAGTGTGAAACACTACAGGGTGTATGTGGAGCTGCCCTGTG	NA	NA	NA	NA	NA	NA	NA	NA	NA	NA	NA	---	NA	NA	hsa_circ_0051121	chr19	41125251	41125398	+	147	147	NM_001042544	LTBP4
hsa_circ_0054289	0.0011197	7.07509	3.43019	2.75133	3.27432	P	P	P	0.237617	0.239551	0.568629	A	A	A	hsa_circ_0054289	circRNA	TCCTGAGGACGTATTTTACCAGCTGGAGGGAGACATGGTTCTCCGAGTCCTGGAGCAAGG	NA	NA	NA	NA	NA	NA	NA	NA	NA	NA	NA	---	NA	NA	hsa_circ_0054289	chr2	42997026	43011007	-	13981	581	NM_012205	HAAO
hsa_circ_0010436	0.012251	7.04687	7.60155	8.58969	8.51069	P	P	P	5.41751	5.53503	5.48811	P	P	P	hsa_circ_0010436	circRNA	GTGTGGACTTGAAACAAAATAAAATGTGTTGCTTCGTGCTGCTGATGGCTCATGCCCTGA	NA	NA	NA	NA	NA	NA	NA	NA	NA	NA	NA	MEG3	NA	NA	hsa_circ_0010436	chr1	21046224	21052559	-	6335	3089	NM_001103161	SH2D5
hsa_circ_0027496	2.92729e-05	7.04259	6.02479	6.29152	6.24216	P	P	P	3.20238	3.53561	3.36665	P	P	P	hsa_circ_0027496	circRNA	AAAGCCTCATTAATTGAATATATAAAGCAGGTGCACCTAGACTGTTGGGCGGGAGCTGCT	NA	NA	NA	NA	NA	NA	NA	NA	NA	NA	NA	---	NA	NA	hsa_circ_0027496	chr12	69260675	69265736	-	5061	682	NM_001874	CPM
hsa_circ_0090173	2.626e-05	6.98719	7.53126	7.21529	7.37112	P	P	P	4.73499	4.54597	4.42262	P	P	P	hsa_circ_0090173	circRNA	TATGTAATACAGGCCATAAGTGTTTAGGGGACCAGTCTGCTGCATTGGTGGGACAAATGT	NA	NA	NA	NA	NA	NA	NA	NA	NA	NA	NA	---	NA	NA	hsa_circ_0090173	chrX	30718954	30725715	+	6761	111	NM_001205019	GK
hsa_circ_0040637	0.00623771	6.97844	7.32653	8.35159	8.27355	P	P	P	5.48208	5.24731	4.97601	P	P	P	hsa_circ_0040637	circRNA	TAAAAATCTACTTTCACATAGAGTTTCATAATAGAAGAGCAGAGTTTCTTACTATGTGAA	NA	NA	NA	NA	NA	NA	NA	NA	NA	NA	NA	---	NA	NA	hsa_circ_0040637	chr16	82181766	82185119	-	3353	888	NM_005792	MPHOSPH6
hsa_circ_0017623	0.00805792	6.9767	3.36848	3.13236	3.36875	P	P	P	0.141547	0.0893054	1.03624	A	A	A	hsa_circ_0017623	circRNA	ATTCTTATCCTTTGACTGCACCACACAAAACAGTCTGTTACTCTGGCCAGGACTTCGACT	NA	NA	NA	NA	NA	NA	NA	NA	NA	NA	NA	MCCC1	NA	NA	hsa_circ_0017623	chr10	7247776	7269899	-	22123	324	NM_001029880	SFMBT2
hsa_circ_0072515	0.0182585	6.96443	7.1872	8.45197	8.30212	P	P	P	5.2395	5.4195	5.16797	P	P	P	hsa_circ_0072515	circRNA	CAGAATGTTTATGGAATCACAATAATTTCAGGCTTGAAACCCAATGGAAAAAGCATGACA	NA	NA	NA	NA	NA	NA	NA	NA	NA	NA	NA	---	NA	NA	hsa_circ_0072515	chr5	55265377	55278639	-	13262	473	NM_002184	IL6ST
hsa_circ_0065361	0.0455127	6.9586	4.61236	6.69277	6.60935	P	P	P	2.79875	3.52854	3.7985	P	P	P	hsa_circ_0065361	circRNA	CAGCTTTTCATTAAAGGATAACACACTGCATGGTACTGTATGACTGTTCCGTGGGACATG	NA	NA	NA	NA	NA	NA	NA	NA	NA	NA	NA	DGAT2	NA	NA	hsa_circ_0065361	chr3	48445260	48459772	-	14512	3991	NM_002673	PLXNB1
hsa_circ_0087955	0.00127853	6.93634	10.6871	10.3508	10.2897	P	P	P	7.62529	7.63745	7.71324	P	P	P	hsa_circ_0087955	circRNA	ATAGCTTCAGGACCAGGTGGCTGGGGTGCAGCTAATAGGCTGGATTACTCTTACGATGAC	NA	NA	NA	NA	NA	NA	NA	NA	NA	NA	NA	PGB	NA	NA	hsa_circ_0087955	chr9	113212338	113234603	-	22265	1504	NM_153366	SVEP1
hsa_circ_0075825	0.00351347	6.92573	3.82435	2.95531	3.22149	P	P	P	0.116677	1.18531	0.206283	A	A	A	hsa_circ_0075825	circRNA	GTGGCTAATGGTGTGAATCATGGCAATACAGTGAAAGACAGTGATTTACTGCTTTTGAGG	NA	NA	NA	NA	NA	NA	NA	NA	NA	NA	NA	---	NA	NA	hsa_circ_0075825	chr6	21909700	22020771	+	111071	456	NR_015410	LINC00340
hsa_circ_0042510	0.0026086	6.90123	4.8703	4.73158	4.96896	P	P	P	1.89287	1.78541	2.45024	A	A	P	hsa_circ_0042510	circRNA	ATGCATTTGGGGCATGGGATATCTTCATGCCAAGGGCATCGTACACAAAGATCTCAAATC	NA	NA	NA	NA	NA	NA	NA	NA	NA	NA	NA	---	NA	NA	hsa_circ_0042510	chr17	25936221	25937224	+	1003	266	NM_014238	KSR1
hsa_circ_0010434	0.000301207	6.87763	10.6395	10.6617	10.5341	P	P	P	7.66347	7.80538	8.00352	P	P	P	hsa_circ_0010434	circRNA	TCCTTGCTGTGTGGACTTGAAACAAAATAAAATGTGTTGCTTCCACCTGCCGGCAGAGTT	NA	NA	NA	NA	NA	NA	NA	NA	NA	NA	NA	MEG3	NA	NA	hsa_circ_0010434	chr1	21046224	21048488	-	2264	2264	NM_001103161	SH2D5
hsa_circ_0030977	0.0209622	6.8619	4.0431	4.19493	3.82609	P	P	P	1.32437	1.79927	0.206283	A	A	A	hsa_circ_0030977	circRNA	AAAGTGAGATCCCACTCAATGTTCATCCGCAGGGAGCAGGCCAACAACATCCTGGCGAGG	NA	NA	NA	NA	NA	NA	NA	NA	NA	NA	NA	---	NA	NA	hsa_circ_0030977	chr13	113783765	113803843	+	20078	1409	NM_000504	F10
hsa_circ_0023526	0.0124021	6.85663	7.68934	8.71767	8.83567	P	P	P	5.74538	5.87673	5.51515	P	P	P	hsa_circ_0023526	circRNA	TCATCCATAAAGCAAGCTCAACCTTGGATGCCAGCATTGGGAGCCGCCTCCTAGCAGGCA	NA	NA	NA	NA	NA	NA	NA	NA	NA	NA	NA	TCEAL4	NA	NA	hsa_circ_0023526	chr11	73685715	73688062	-	2347	929	NM_003355	UCP2
hsa_circ_0025525	0.00845335	6.84919	2.72203	2.58371	3.41126	P	P	P	0.146668	0.177796	0.206283	A	A	A	hsa_circ_0025525	circRNA	TGCATCCGTGAGAACTTTACTGAATATTTGATGGTGGATGAAGAAGCACATGAATTTGTT	NA	NA	NA	NA	NA	NA	NA	NA	NA	NA	NA	GFAP	NA	NA	hsa_circ_0025525	chr12	15656841	15669890	+	13049	674	NM_030667	PTPRO
hsa_circ_0051118	3.54028e-05	6.84728	7.2311	6.90323	6.988	P	P	P	4.24627	4.44021	4.1105	P	P	P	hsa_circ_0051118	circRNA	ACCGAGACAGGGTTACGAGGGGGCACGGGATGGGCGTCACTGCGTGGGTACGGGACTTCA	NA	NA	NA	NA	NA	NA	NA	NA	NA	NA	NA	---	NA	NA	hsa_circ_0051118	chr19	41123093	41128572	+	5479	451	NM_001042544	LTBP4
hsa_circ_0009210	0.00455991	6.84359	5.67996	5.72237	5.85762	P	P	P	3.10319	3.23723	2.49978	P	P	P	hsa_circ_0009210	circRNA	CTGCGTCGCGTGCAGGTGACGGAGCTCCCGCCACTCGAAGCTGGAGAAGGCGGACATCCT	NA	NA	NA	NA	NA	NA	NA	NA	NA	NA	NA	---	NA	NA	hsa_circ_0009210	chr1	934905	934993	-	88	88	NM_001142467	HES4
hsa_circ_0037391	9.5867e-05	6.8283	7.1879	7.13557	6.97155	P	P	P	4.3686	4.47741	4.1203	P	P	P	hsa_circ_0037391	circRNA	ACTGCACCTTCTTTACAATAAAGACTGTAACTGAGCTGACTGTGACGCCGCGGCCGGCGC	NA	NA	NA	NA	NA	NA	NA	NA	NA	NA	NA	PHKA1	NA	NA	hsa_circ_0037391	chr16	2039945	2044276	+	4331	2051	NM_004209	SYNGR3
hsa_circ_0044703	1.83886e-05	6.8185	8.39398	8.32333	8.20978	P	P	P	5.48849	5.58924	5.5452	P	P	P	hsa_circ_0044703	circRNA	ACCATGAAAAGACAGTGGAGCATTGTTTTCACATGTGTGATAGAATGGTTATCTATTTCT	NA	NA	NA	NA	NA	NA	NA	NA	NA	NA	NA	---	NA	NA	hsa_circ_0044703	chr17	53481127	53485181	-	4054	177	NM_012329	MMD
hsa_circ_0016908	0.00332096	6.81165	5.77398	5.35096	5.56541	P	P	P	3.14379	2.23997	2.89034	P	A	P	hsa_circ_0016908	circRNA	CCTTCGGAAGCTGAGCTTTCAGCACAAGATCGGGATCCTTTATTGCAAAGCAGGCCAGAG	NA	NA	NA	NA	NA	NA	NA	NA	NA	NA	NA	MGC85513	NA	NA	hsa_circ_0016908	chr1	232538137	232619712	-	81575	3216	NM_020808	SIPA1L2
hsa_circ_0001231	9.07066e-05	6.80667	5.15144	5.26064	4.86421	P	P	P	2.49734	2.39501	2.07946	A	P	A	hsa_circ_0001231	circRNA	GCTCAGAATTGCCAAGATTTATGACAGAAGTGATTATTTTTCTGTTGCCCACTTTTCAAT	NA	NA	NA	NA	NA	NA	NA	NA	NA	NA	NA	---	NA	NA	hsa_circ_0001231	chr22	38917612	38964294	-	46682	986	NM_007068	DMC1
hsa_circ_0025319	0.0437029	6.78429	7.38987	9.25166	9.10227	P	P	P	6.19773	6.10638	5.73568	P	P	P	hsa_circ_0025319	circRNA	TAGATAAAATCACTTCTGTTTGTTCAGTTTTTCAGCTGCCAGGCTCATTCAAGAGAGCCC	NA	NA	NA	NA	NA	NA	NA	NA	NA	NA	NA	---	NA	NA	hsa_circ_0025319	chr12	7085346	7086687	-	1341	995	NM_005768	LPCAT3
hsa_circ_0087956	0.000377923	6.77137	8.10147	8.33779	8.4221	P	P	P	5.60142	5.4965	5.50145	P	P	P	hsa_circ_0087956	circRNA	ATTCCAACAGCTAAAGACAACTCTGGTGAAAAGTAAGAACATGTCCTCATCTCCGCCAGC	NA	NA	NA	NA	NA	NA	NA	NA	NA	NA	NA	PGBD1	NA	NA	hsa_circ_0087956	chr9	113259094	113265497	-	6403	497	NM_153366	SVEP1
hsa_circ_0027497	4.53758e-05	6.75451	6.36775	6.47866	6.59578	P	P	P	3.68819	3.89968	3.57697	P	P	P	hsa_circ_0027497	circRNA	TTTCCTAATGGTGTTACAAATGGATACTCTTGGTATCCACTCCAAGACTGTTGGGCGGGA	NA	NA	NA	NA	NA	NA	NA	NA	NA	NA	NA	---	NA	NA	hsa_circ_0027497	chr12	69263104	69265736	-	2632	529	NM_001874	CPM
hsa_circ_0024003	0.00881679	6.73013	3.38962	3.83351	3.65474	P	P	P	0.116637	1.29589	1.00532	A	A	A	hsa_circ_0024003	circRNA	GACGACAATGGATGGAAGTATGATGTGATGGATATAATTATGGGACACTGTGTGGGCACA	NA	NA	NA	NA	NA	NA	NA	NA	NA	NA	NA	---	NA	NA	hsa_circ_0024003	chr11	92085261	92620279	+	535018	13068	NM_001008781	FAT3
hsa_circ_0000277	0.00235971	6.67665	3.00689	3.73568	3.15124	P	P	P	0.638503	0.40146	0.724429	A	A	A	hsa_circ_0000277	circRNA	GCATTTCAAGATGATTCTTTGGGATTGGGACTTAAAACAATGGTATAAGCCTCATTATCA	NA	NA	NA	NA	NA	NA	NA	NA	NA	NA	NA	CD244	NA	NA	hsa_circ_0000277	chr11	14793482	14810788	+	17306	437	NM_000922	PDE3B
hsa_circ_0024685	0.000802476	6.67287	4.62693	5.11355	5.08669	P	P	P	2.4456	2.36577	1.75779	A	P	A	hsa_circ_0024685	circRNA	TCTCCTCTGGGGATGACCTGGAAATGCACCAGTGCCGGAGTGACGAGTACAACTGCAGTT	NA	NA	NA	NA	NA	NA	NA	NA	NA	NA	NA	Nipbl	NA	NA	hsa_circ_0024685	chr11	121447989	121498476	+	50487	3117	NM_003105	SORL1
hsa_circ_0021338	2.65477e-05	6.65698	3.03752	3.20739	3.34623	P	P	P	0.509005	0.323671	0.559807	A	A	A	hsa_circ_0021338	circRNA	GGAAATGAAACAGATGATTCTTTGGGATTGGGACTTAAAACAATGGTATAAGCCTCATTA	NA	NA	NA	NA	NA	NA	NA	NA	NA	NA	NA	Cd248	NA	NA	hsa_circ_0021338	chr11	14793482	14856641	+	63159	1342	NM_000922	PDE3B
hsa_circ_0004077	0.0348925	6.65418	4.56195	4.26411	4.16977	P	P	P	1.95432	2.04018	0.206283	A	A	A	hsa_circ_0004077	circRNA	TGGGGGCGTGTGGATTAAACTTCATTGACTTGATGGTGCGACAAGGGAATATTGACAACC	NA	NA	NA	NA	NA	NA	NA	NA	NA	NA	NA	TSPAN1	NA	NA	hsa_circ_0004077	chr16	77850817	77859358	+	8541	346	NM_020927	VAT1L
hsa_circ_0032971	9.15593e-05	6.6219	8.41638	8.36229	8.35144	P	P	P	5.74449	5.64497	5.55341	P	P	P	hsa_circ_0032971	circRNA	TATCTGAGGATCAGTGATAAACATCAACGAATGTGAGCACAGGAACCACACGTGCAACCT	NA	NA	NA	NA	NA	NA	NA	NA	NA	NA	NA	---	NA	NA	hsa_circ_0032971	chr14	92347635	92347762	-	127	127	NM_006329	FBLN5
hsa_circ_0069393	7.63789e-05	6.57897	4.82458	4.91542	5.14773	P	P	P	2.2182	2.04987	2.45648	A	A	P	hsa_circ_0069393	circRNA	ATGGTCAAATGGTTTCCATTTCGTAGAGTGACGTTTTCTGTTGTGAGTCAGCCTCAGGAC	NA	NA	NA	NA	NA	NA	NA	NA	NA	NA	NA	Car7	NA	NA	hsa_circ_0069393	chr4	30921774	31148423	+	226649	4546	NM_001173523	PCDH7
hsa_circ_0051119	0.000108152	6.57146	7.08542	6.65424	6.96009	P	P	P	4.23375	4.36911	3.95058	P	P	P	hsa_circ_0051119	circRNA	CTCCGGAGAGGGTTACGAGGGGGCACGGGATGGGCGTCACTGCGTGGGTACGGGACTTCA	NA	NA	NA	NA	NA	NA	NA	NA	NA	NA	NA	---	NA	NA	hsa_circ_0051119	chr19	41123093	41128926	+	5833	523	NM_001042544	LTBP4
hsa_circ_0010420	3.35585e-05	6.54013	12.7256	12.6945	12.594	P	P	P	9.95164	9.99337	9.94397	P	P	P	hsa_circ_0010420	circRNA	ACAGGGCTATTTCTCCAATGTACAATAAAAGAATTGTTCCTGTGTCTCAGCCTCGCCTCG	NA	NA	NA	NA	NA	NA	NA	NA	NA	NA	NA	---	NA	NA	hsa_circ_0010420	chr1	20808883	20812728	-	3845	2351	NM_018584	CAMK2N1
hsa_circ_0088347	0.00120543	6.53305	10.1671	9.96751	9.74422	P	P	P	7.20399	7.30744	7.27311	P	P	P	hsa_circ_0088347	circRNA	CAACATGCAGATCCTCACAAAGGATTCAGTGACAATTAGCGTGGATGGTGTGGTCTATTA	NA	NA	NA	NA	NA	NA	NA	NA	NA	NA	NA	Pax8	NA	NA	hsa_circ_0088347	chr9	124111397	124111601	-	204	204	NM_004099	STOM
hsa_circ_0061101	0.00572282	6.52166	3.63299	3.18567	3.10251	P	P	P	0.195589	1.21137	0.206283	A	A	A	hsa_circ_0061101	circRNA	GAGTGCCAGTGGCCAGTACTGTGACATCTGCACGGCTGCCAACAGCAACAAGGCACACCC	NA	NA	NA	NA	NA	NA	NA	NA	NA	NA	NA	---	NA	NA	hsa_circ_0061101	chr20	60921968	60937608	-	15640	775	NM_005560	LAMA5
hsa_circ_0023367	0.0131988	6.50838	9.88771	10.9098	10.9426	P	P	P	8.07914	7.79792	7.96915	P	P	P	hsa_circ_0023367	circRNA	TTCATCTTTATATTAAACTTCCCCTGTTCAAATAAGGCCCAATGGCTGCAAAATCGCAAC	NA	NA	NA	NA	NA	NA	NA	NA	NA	NA	NA	---	NA	NA	hsa_circ_0023367	chr11	71145456	71156004	-	10548	2398	NM_001360	DHCR7
hsa_circ_0019062	0.000767207	6.49833	9.68844	9.62282	9.65784	P	P	P	7.04215	7.04374	6.7665	P	P	P	hsa_circ_0019062	circRNA	TGTGCTGCAAACAAACACATCCCACTCAAACTGCATTTTTATCCAGCGTTGATCTTCACA	NA	NA	NA	NA	NA	NA	NA	NA	NA	NA	NA	OTX2	NA	NA	hsa_circ_0019062	chr10	90681039	90683244	+	2205	533	NM_020799	STAMBPL1
hsa_circ_0061177	0.000195073	6.49795	4.54637	4.37986	4.34609	P	P	P	1.51567	1.73003	1.90812	A	A	A	hsa_circ_0061177	circRNA	CCACACGCTGAGTCTGTAGAAGAGGCGACACCAGGGCTTCCAAATGAACAACCGAAAGGA	NA	NA	NA	NA	NA	NA	NA	NA	NA	NA	NA	zgc:174574	NA	NA	hsa_circ_0061177	chr20	62384038	62422143	-	38105	1431	NM_025224	ZBTB46
hsa_circ_0023528	7.83604e-05	6.42605	5.51921	5.60805	5.8399	P	P	P	3.12336	3.0445	2.73889	P	P	P	hsa_circ_0023528	circRNA	AAGCAAGCTCAACCTTGGATTCCGGCAGAGTTCCTCTATCTCGTCTTGTTGCTGATTAAA	NA	NA	NA	NA	NA	NA	NA	NA	NA	NA	NA	Tceal6	NA	NA	hsa_circ_0023528	chr11	73685715	73689522	-	3807	1365	NM_003355	UCP2
hsa_circ_0004795	0.00213444	6.42148	5.66961	5.73067	5.53294	P	P	P	2.62197	3.24299	2.96026	A	P	P	hsa_circ_0004795	circRNA	ACCCTCTGTGAAGTGATTATTTTTCTGTTGCCCACTTTTCAATATGAAGGAGGATCAAGT	NA	NA	NA	NA	NA	NA	NA	NA	NA	NA	NA	---	NA	NA	hsa_circ_0004795	chr22	38948670	38964294	-	15624	454	NM_007068	DMC1
hsa_circ_0073802	0.015189	6.41825	2.5594	3.95194	4.10531	P	P	P	1.4927	1.03098	0.206283	A	A	A	hsa_circ_0073802	circRNA	TTATAAGCAGGATGCAAATGGAGATTGTATAGATCAGAGAACAGGCATGTGTTTCTCGGG	NA	NA	NA	NA	NA	NA	NA	NA	NA	NA	NA	---	NA	NA	hsa_circ_0073802	chr5	127727710	127730967	-	3257	525	NM_001999	FBN2
hsa_circ_0041624	0.0226252	6.37697	3.77121	5.58449	5.17683	P	P	P	2.77244	2.48182	1.54567	P	P	A	hsa_circ_0041624	circRNA	GGCTAATAAAATTGTTTCTTTGTGGACTAAGTCCTAAATGCCCAGAAGGCTGGATATGGT	NA	NA	NA	NA	NA	NA	NA	NA	NA	NA	NA	Kcne4	NA	NA	hsa_circ_0041624	chr17	4845871	4848517	+	2646	968	NM_015528	RNF167
hsa_circ_0063784	0.00548129	6.3615	7.51373	8.26801	8.21402	P	P	P	5.48788	5.34671	5.25902	P	P	P	hsa_circ_0063784	circRNA	AATATGAGGCCGCGCTGACCATCTACGATACCCACTATGTAAAATGGACCAATGACAAGA	NA	NA	NA	NA	NA	NA	NA	NA	NA	NA	NA	Snora41	NA	NA	hsa_circ_0063784	chr22	46668231	46681176	+	12945	723	NM_017931	TTC38
hsa_circ_0017637	1.48727e-05	6.32803	2.83169	2.79692	2.78008	P	P	P	0.0892086	0.125909	0.206283	A	A	A	hsa_circ_0017637	circRNA	CCTCCCAAAGGTTGAAATCAGCATTCAGAGCAACTTCCAGCCAGGAATGAAATTGGAAGT	NA	NA	NA	NA	NA	NA	NA	NA	NA	NA	NA	Mcf2l	NA	NA	hsa_circ_0017637	chr10	7285519	7409851	-	124332	925	NM_001029880	SFMBT2
hsa_circ_0087743	0.00369668	6.31895	3.34302	2.79144	3.2353	P	P	P	0.141614	0.0866575	1.01916	A	A	A	hsa_circ_0087743	circRNA	ATGATCACAGAGAACAGTGCAGAAAAATGCAAAATATGTTTGCCTGGCAAATAAAAACTG	NA	NA	NA	NA	NA	NA	NA	NA	NA	NA	NA	ANKRD28	NA	NA	hsa_circ_0087743	chr9	102594970	102609897	+	14927	682	NM_173200	NR4A3
hsa_circ_0079598	0.0413209	6.31626	4.15845	4.53474	4.32665	P	P	P	1.93705	2.22984	0.206283	A	A	A	hsa_circ_0079598	circRNA	CAGGGAGTCTTATGAAAATGATATTGCTTCTATGAATAGCACTAGACAAACTGAATGGAT	NA	NA	NA	NA	NA	NA	NA	NA	NA	NA	NA	---	NA	NA	hsa_circ_0079598	chr7	23383336	23391205	-	7869	676	NM_006547	IGF2BP3
hsa_circ_0060939	0.00243261	6.31053	4.89788	4.73229	4.94652	P	P	P	1.80135	2.42409	2.31337	A	P	A	hsa_circ_0060939	circRNA	AATTGTATGCTGCTGTCACAGAGCTCCAGCTGGCTGCGGTGGAAACGGACAGGAGGAAAC	NA	NA	NA	NA	NA	NA	NA	NA	NA	NA	NA	---	NA	NA	hsa_circ_0060939	chr20	52779255	52790516	-	11261	1388	NM_000782	CYP24A1
hsa_circ_0061021	0.00502891	6.29549	3.34252	2.34657	3.44498	P	P	P	0.218517	0.123482	0.923071	A	A	A	hsa_circ_0061021	circRNA	CATCAATGAGGCAGTCGACTACGAGCTCAACAGAGCTTTCATGCTGACAGTGATGGTGTC	NA	NA	NA	NA	NA	NA	NA	NA	NA	NA	NA	---	NA	NA	hsa_circ_0061021	chr20	60498508	60509278	+	10770	1170	NM_001794	CDH4
hsa_circ_0075886	0.000173062	6.28496	4.00423	4.46589	4.09603	P	P	P	1.58347	1.71177	1.33217	A	A	A	hsa_circ_0075886	circRNA	CTAACCAAAACCCAAAGGCTCTTTTCAGAGCCAACCAGACGCGGCAAGCAAGGCGGAAAG	NA	NA	NA	NA	NA	NA	NA	NA	NA	NA	NA	---	NA	NA	hsa_circ_0075886	chr6	26197011	26199464	-	2453	864	NM_003530	HIST1H3D
hsa_circ_0069046	0.00457057	6.28321	5.59664	5.04997	5.3677	P	P	P	3.00951	2.89081	2.02699	P	P	A	hsa_circ_0069046	circRNA	GATGAACACGGTATGCATCGTGCAGAAGCGAGACACTAAGAAAATGTATGCAATGAAGTA	NA	NA	NA	NA	NA	NA	NA	NA	NA	NA	NA	Parm1	NA	NA	hsa_circ_0069046	chr4	5170025	5399971	+	229946	364	NM_018401	STK32B
hsa_circ_0052433	0.0455259	6.27984	5.084	7.01382	6.6702	P	P	P	4.0405	3.85744	3.49152	P	P	P	hsa_circ_0052433	circRNA	AGTTCAAATAAATGGGTCACATTTTCAAATGGATGTTGGGAGACAGGGGGAACATCTCAG	NA	NA	NA	NA	NA	NA	NA	NA	NA	NA	NA	Gm13157	NA	NA	hsa_circ_0052433	chr2	1635658	1642750	-	7092	2684	NM_012293	PXDN
hsa_circ_0075828	0.0150922	6.26456	3.93152	3.3343	3.61475	P	P	P	0.326797	0.495834	1.73847	A	A	A	hsa_circ_0075828	circRNA	GTGGCTAATGGATCTGCATTTACTGCTCAACCACATCTAATTTGATGTCCTCTGCAGATT	NA	NA	NA	NA	NA	NA	NA	NA	NA	NA	NA	---	NA	NA	hsa_circ_0075828	chr6	22020567	22020771	+	204	204	NR_015410	LINC00340
hsa_circ_0005512	3.10277e-05	6.2479	5.7349	5.62971	5.47081	P	P	P	2.82589	2.93607	3.13798	P	P	P	hsa_circ_0005512	circRNA	CAACTATGACAAGTGATTATTTTTCTGTTGCCCACTTTTCAATATGAAGGAGGATCAAGT	NA	NA	NA	NA	NA	NA	NA	NA	NA	NA	NA	---	NA	NA	hsa_circ_0005512	chr22	38933596	38964294	-	30698	869	NM_007068	DMC1
hsa_circ_0012580	0.000507556	6.24471	2.78565	2.77473	3.08025	P	P	P	0.213113	0.312159	0.206283	A	A	A	hsa_circ_0012580	circRNA	GGGCTATGTATCATGTCTGCAGTAAAAATCGAACTTCTAGCAATAGTAAAACAAAAGACT	NA	NA	NA	NA	NA	NA	NA	NA	NA	NA	NA	---	NA	NA	hsa_circ_0012580	chr1	53343353	53352725	+	9372	562	NM_001004339	ZYG11A
hsa_circ_0015067	0.000695067	6.23874	5.78523	5.57046	5.88519	P	P	P	3.2131	2.75842	3.30601	P	P	P	hsa_circ_0015067	circRNA	AGGGCATCAGTGCCTGCAACGAGTTCACCACCCACGTGATGAATCTCCTGCGAGAGCAAA	NA	NA	NA	NA	NA	NA	NA	NA	NA	NA	NA	Calm1	NA	NA	hsa_circ_0015067	chr1	164768935	164790863	+	21928	690	NM_002585	PBX1
hsa_circ_0087335	0.00228767	6.23689	5.21556	5.31673	5.40315	P	P	P	2.46738	2.48114	3.00344	A	P	P	hsa_circ_0087335	circRNA	CATCATCGGGCCTTAAATTGGAATGTGAGAAACTGGCAAGTGAAAAGACAGAAATGCAGA	NA	NA	NA	NA	NA	NA	NA	NA	NA	NA	NA	Rev3l	NA	NA	hsa_circ_0087335	chr9	84267128	84300811	-	33683	247	NM_005077	TLE1
hsa_circ_0079587	0.00576497	6.22269	2.76169	2.51412	3.23273	P	P	P	0.285793	0.196299	0.206283	A	A	A	hsa_circ_0079587	circRNA	CAGAGTTATTGGAAAAGGAGGCAAAACGGTGCTGGATAGTTTACTAGTCCAGTATGGAGT	NA	NA	NA	NA	NA	NA	NA	NA	NA	NA	NA	---	NA	NA	hsa_circ_0079587	chr7	23353140	23401360	-	48220	1242	NM_006547	IGF2BP3
hsa_circ_0008315	0.00128612	6.18178	5.33452	4.76479	5.26993	P	P	P	2.6009	2.34501	2.58962	A	A	P	hsa_circ_0008315	circRNA	TTTGCAATAGCCACAGCTGCAGCAGGACATGGGAGTCCACCAGCAGTCCTAGAGTCTGCA	NA	NA	NA	NA	NA	NA	NA	NA	NA	NA	NA	Hectd2	NA	NA	hsa_circ_0008315	chr5	80419460	80422982	+	3522	216	NM_006909	RASGRF2
hsa_circ_0005717	0.0220372	6.17727	4.13425	3.64557	4.03552	P	P	P	0.277345	1.95809	1.27856	A	A	A	hsa_circ_0005717	circRNA	CCGGCTGAAGTCTGTCCTACAGCAGCCAACACAGCAGGCCTTGCTGCTGGGTGGCCCAAG	NA	NA	NA	NA	NA	NA	NA	NA	NA	NA	NA	---	NA	NA	hsa_circ_0005717	chr20	49218608	49219181	-	573	573	NM_080829	FAM65C
hsa_circ_0032856	0.00413992	6.17648	3.5786	3.11018	2.81529	P	P	P	0.436403	0.656792	0.624911	A	A	A	hsa_circ_0032856	circRNA	TTATCTCCAGCGCTTGGTTTCAGTTGGACTTGATTCAAAGAATGCAGTTTGTGTTTGGGA	NA	NA	NA	NA	NA	NA	NA	NA	NA	NA	NA	---	NA	NA	hsa_circ_0032856	chr14	89084993	89212627	-	127634	5181	NM_183387	EML5
hsa_circ_0081745	0.0284123	6.16484	2.49905	3.82007	4.47297	P	P	P	0.215218	1.40312	1.58723	A	A	A	hsa_circ_0081745	circRNA	CAGACATGCTACATGTTGTTCAAAAAGAATGATCTATAAGTCGTAAGGACTTAGTGGATT	NA	NA	NA	NA	NA	NA	NA	NA	NA	NA	NA	DHX40	NA	NA	hsa_circ_0081745	chr7	102944857	102950922	+	6065	498	NM_004279	PMPCB
hsa_circ_0055005	2.41602e-05	6.15914	6.74388	6.73581	6.97309	P	P	P	4.16648	4.0613	4.35421	P	P	P	hsa_circ_0055005	circRNA	TAACCTTCATCTAGTTAACCAATCGCAAAGCAAGGGGGAAGTGATGGCTTGGACAACAGT	NA	NA	NA	NA	NA	NA	NA	NA	NA	NA	NA	---	NA	NA	hsa_circ_0055005	chr2	66739280	66796277	+	56997	468	NM_002398	MEIS1
hsa_circ_0006659	5.59596e-06	6.15339	8.48346	8.33604	8.36472	P	P	P	5.76728	5.82759	5.72771	P	P	P	hsa_circ_0006659	circRNA	GAGTCAATTCTGAAAGCTCCGGTATTATTCTTTGATAGAAATCCAATAGGTGTATTTGTC	NA	NA	NA	NA	NA	NA	NA	NA	NA	NA	NA	---	NA	NA	hsa_circ_0006659	chr13	95813442	95822882	-	9440	728	NM_005845	ABCC4
hsa_circ_0044706	1.16462e-05	6.13972	8.30529	8.24121	8.17467	P	P	P	5.65959	5.61095	5.59833	P	P	P	hsa_circ_0044706	circRNA	AAGCCAACTTGCTATGAACATGCTGCTAACTGTTACACACACGCAGGGCGGGGCGCAGGA	NA	NA	NA	NA	NA	NA	NA	NA	NA	NA	NA	---	NA	NA	hsa_circ_0044706	chr17	53491511	53499341	-	7830	393	NM_012329	MMD
hsa_circ_0064580	0.0212856	6.13271	3.67792	3.44036	3.83017	P	P	P	0.828688	0.142387	1.72093	A	A	A	hsa_circ_0064580	circRNA	ATGTCTTCAGGAGATGTCAGTGAAAAAAGGGATCCAGAATGATTACTAACCTATGACTCC	NA	NA	NA	NA	NA	NA	NA	NA	NA	NA	NA	Rbfox1	NA	NA	hsa_circ_0064580	chr3	24168989	24270492	-	101503	1186	NM_001252634	THRB
hsa_circ_0059357	0.000224018	6.11133	8.84458	8.76309	8.5448	P	P	P	6.15632	6.14147	6.03353	P	P	P	hsa_circ_0059357	circRNA	TTCAAAGAGAGCCTCTCCTTCCGATGAAAAGAGAAAGGAAGAATGGACTACAGCCACCAA	NA	NA	NA	NA	NA	NA	NA	NA	NA	NA	NA	Herc1	NA	NA	hsa_circ_0059357	chr20	4760668	4781708	-	21040	5263	NM_170774	RASSF2
hsa_circ_0000163	0.000434141	6.09127	9.97794	9.70575	9.89023	P	P	P	7.22679	7.23939	7.29967	P	P	P	hsa_circ_0000163	circRNA	GAAAGTGGGCTTCAGCTGCTGCTTTGGCAAGACTTGGTCGTCTCTATACTGAGAGAGCAA	NA	NA	NA	NA	NA	NA	NA	NA	NA	NA	NA	Abca5	NA	NA	hsa_circ_0000163	chr1	180171387	180171482	+	95	95	---	---
hsa_circ_0027874	0.0152898	6.06866	4.14743	4.26209	4.29311	P	P	P	2.13351	0.928409	1.59518	A	A	A	hsa_circ_0027874	circRNA	GCAGTCTGGGCTTCATCATACACAACAAAGAAACGTTCTTCAACAATGCCACAAGAAGTA	NA	NA	NA	NA	NA	NA	NA	NA	NA	NA	NA	---	NA	NA	hsa_circ_0027874	chr12	101413811	101442179	+	28368	578	NM_178826	ANO4
hsa_circ_0084096	0.000458753	6.0209	8.39373	8.60463	8.7512	P	P	P	5.94323	6.07647	5.9788	P	P	P	hsa_circ_0084096	circRNA	AGGCACTGGGCCTGGGCAAACATAATTACTGCCGGTTGCAGCGAGCCAAGGTGTTTCAAC	NA	NA	NA	NA	NA	NA	NA	NA	NA	NA	NA	Cyp2b13	NA	NA	hsa_circ_0084096	chr8	42040236	42045534	-	5298	550	NM_000930	PLAT
hsa_circ_0017648	0.0166608	6.01835	3.13875	3.31982	3.35436	P	P	P	0.199067	1.3336	0.206283	A	A	A	hsa_circ_0017648	circRNA	AGGTGTTGATGCCGCCGGACGGTAATTTTTTCTGCAGGATGAATTAAGAGAAGAGACACT	NA	NA	NA	NA	NA	NA	NA	NA	NA	NA	NA	Mcm3ap	NA	NA	hsa_circ_0017648	chr10	7409610	7423911	-	14301	487	NM_001029880	SFMBT2
hsa_circ_0071966	0.00206216	6.01573	3.42887	2.51605	2.85809	P	P	P	0.762182	0.132994	0.206283	A	A	A	hsa_circ_0071966	circRNA	GATGAGGAAGGAAGTGACCAAGTTCACTCCTGGATGCTAGCTACAAGCCAAGCCTTAGAC	NA	NA	NA	NA	NA	NA	NA	NA	NA	NA	NA	---	NA	NA	hsa_circ_0071966	chr5	14601073	14601551	+	478	284	NM_019018	FAM105A
hsa_circ_0017621	0.0186174	6.00115	3.33131	3.23266	3.67714	P	P	P	0.395205	0.124345	1.57046	A	A	A	hsa_circ_0017621	circRNA	GACACCACAGGGCTGCAGACTCCTGTTCCAGAGGTCATTGTTGATGTGGAATCCATGGAC	NA	NA	NA	NA	NA	NA	NA	NA	NA	NA	NA	Mcc	NA	NA	hsa_circ_0017621	chr10	7242375	7247890	-	5515	228	NM_001029880	SFMBT2
hsa_circ_0046833	0.0331865	5.97447	6.94016	8.45185	8.3064	P	P	P	5.5789	5.50177	5.28693	P	P	P	hsa_circ_0046833	circRNA	ATTTCACACCAGAAAACTATAAGGGAAGACATGTAAGGAATTTGCATAAGACAGTTATGC	NA	NA	NA	NA	NA	NA	NA	NA	NA	NA	NA	---	NA	NA	hsa_circ_0046833	chr18	9117835	9119386	+	1551	129	NM_021074	NDUFV2
hsa_circ_0051122	0.000987647	5.97399	7.71553	7.43036	7.77157	P	P	P	5.02236	5.06837	5.11193	P	P	P	hsa_circ_0051122	circRNA	TACTACTACCACACACAGCGGCTGGAGTGCATCGACGTGGACGAATGTCAGCTCTTCCGA	NA	NA	NA	NA	NA	NA	NA	NA	NA	NA	NA	---	NA	NA	hsa_circ_0051122	chr19	41129508	41129637	+	129	129	NM_001042544	LTBP4
hsa_circ_0074945	0.00883753	5.97233	3.95438	3.8605	3.67819	P	P	P	0.637308	1.65878	1.2976	A	A	A	hsa_circ_0074945	circRNA	GGTCTTCACGAATCCTTGAGCTTGATTTGATTGTCAGAGATGAAGACGGAAATATCTTGG	NA	NA	NA	NA	NA	NA	NA	NA	NA	NA	NA	---	NA	NA	hsa_circ_0074945	chr5	169108747	169116337	+	7590	373	NM_004946	DOCK2
hsa_circ_0068490	0.00133238	5.96473	6.3648	6.25225	6.55543	P	P	P	3.51859	4.14734	3.72074	P	P	P	hsa_circ_0068490	circRNA	TGCCTTCCAGATCAAAGTTGGTCCAAAAGTTTTGGGGCCTTTCTGTGGAGAGAAAGCCCC	NA	NA	NA	NA	NA	NA	NA	NA	NA	NA	NA	---	NA	NA	hsa_circ_0068490	chr3	186959268	186971103	-	11835	559	NM_001879	MASP1
hsa_circ_0016419	0.00446266	5.92128	3.18021	2.43994	2.96539	P	P	P	0.285676	0.237882	0.452064	A	A	A	hsa_circ_0016419	circRNA	TCCTGGGCATATATAATCACACAGGGACCCAGTTCTTTGAAATTAGGAAAATGAGACCGC	NA	NA	NA	NA	NA	NA	NA	NA	NA	NA	NA	Tshz3	NA	NA	hsa_circ_0016419	chr1	213139063	213139687	+	624	132	NM_001136474	VASH2
hsa_circ_0018254	0.0298401	5.92106	4.07283	3.72487	3.7181	P	P	P	0.112	1.34924	1.87549	A	A	A	hsa_circ_0018254	circRNA	TAAATACTAGAAATTTGTACCGCCTGATGCTGCAATGCTGGAAGCAGGAGCCGGACAAAA	NA	NA	NA	NA	NA	NA	NA	NA	NA	NA	NA	IGFBP2	NA	NA	hsa_circ_0018254	chr10	43620330	43622952	+	2622	1030	NM_020630	RET
hsa_circ_0082022	2.96506e-06	5.91026	5.94002	5.83193	5.77191	P	P	P	3.19614	3.33523	3.3238	P	P	P	hsa_circ_0082022	circRNA	ATCACGCTAGCTGGAAATGGAGAAGCTTCAGCTACAAGCCCTTGAGCAAGAGCACAAGAA	NA	NA	NA	NA	NA	NA	NA	NA	NA	NA	NA	---	NA	NA	hsa_circ_0082022	chr7	117400488	117432835	-	32347	2758	NM_033427	CTTNBP2
hsa_circ_0015497	0.0147046	5.90374	11.8048	12.7351	12.7341	P	P	P	9.95956	9.92318	9.88915	P	P	P	hsa_circ_0015497	circRNA	GGAGGTGTGTGGAATAAATTATTTTTGTTAAGGCAATGGCTGGTGCTGACGTGCAGACAC	NA	NA	NA	NA	NA	NA	NA	NA	NA	NA	NA	Gm884	NA	NA	hsa_circ_0015497	chr1	180145065	180167169	+	22104	2829	NM_002826	QSOX1
hsa_circ_0073131	0.00385314	5.90199	4.02559	4.81947	4.95443	P	P	P	1.66839	1.74881	2.6456	A	A	P	hsa_circ_0073131	circRNA	TCAGAATGCATTGCCATTTTCACATAGGCAATAATAAATAGTACCATCACCCCAAACATG	NA	NA	NA	NA	NA	NA	NA	NA	NA	NA	NA	---	NA	NA	hsa_circ_0073131	chr5	78734832	78746944	-	12112	365	NM_004272	HOMER1
hsa_circ_0004464	0.0054778	5.90131	2.70009	3.7134	3.66912	P	P	P	1.27053	0.152999	0.967289	A	A	A	hsa_circ_0004464	circRNA	GAACCCACAGAAGATTCTGGTGTTGAAGAAGAAGAAAAAGCTGCAGAGATGCATAAAATG	NA	NA	NA	NA	NA	NA	NA	NA	NA	NA	NA	---	NA	NA	hsa_circ_0004464	chr7	74113290	74120764	+	7474	447	NM_032999	GTF2I
hsa_circ_0003173	0.00257084	5.90015	4.73068	5.20706	5.48867	P	P	P	2.49591	2.51867	2.80723	A	P	P	hsa_circ_0003173	circRNA	CATCCGCACTGGAGCTTGCCAAGCGATTTGTAGAAATAGTTGTGGAGATGGATTTTGTTC	NA	NA	NA	NA	NA	NA	NA	NA	NA	NA	NA	---	NA	NA	hsa_circ_0003173	chr5	127800416	127866386	-	65970	489	NM_001999	FBN2
hsa_circ_0055582	0.0243243	5.88433	7.83272	9.14502	9.02072	P	P	P	6.36536	6.08537	6.18738	P	P	P	hsa_circ_0055582	circRNA	TTCAATAAATGTCGCTTCATTTCCCATGGGATATTGTGGCTGGAGACATGAGCAAGAAAA	NA	NA	NA	NA	NA	NA	NA	NA	NA	NA	NA	---	NA	NA	hsa_circ_0055582	chr2	91824708	91843023	-	18315	429	NR_027238	LOC654342
hsa_circ_0066441	0.0105512	5.87468	6.7589	6.59544	6.90972	P	P	P	4.43932	3.49065	4.48713	P	P	P	hsa_circ_0066441	circRNA	GTGCCCACAGTGCTCAGTGACCTGTGGAAAAGGCTACAAACAAAGGCTTGTCTCGTGCAG	NA	NA	NA	NA	NA	NA	NA	NA	NA	NA	NA	---	NA	NA	hsa_circ_0066441	chr3	64524878	64532628	-	7750	744	NM_182920	ADAMTS9
hsa_circ_0035125	0.0162367	5.87449	5.26083	5.2841	5.20226	P	P	P	2.93472	1.93517	2.99212	P	A	P	hsa_circ_0035125	circRNA	ATGGAGGTATCTTCATCTTCTGTTACCACAATGATGGGAAGCTGTATTCTGCCACAGTGG	NA	NA	NA	NA	NA	NA	NA	NA	NA	NA	NA	lsamp	NA	NA	hsa_circ_0035125	chr15	48054396	48060812	+	6416	1205	NM_153619	SEMA6D
hsa_circ_0044702	0.000526434	5.86113	10.4996	10.1949	10.2383	P	P	P	7.71517	7.82284	7.75834	P	P	P	hsa_circ_0044702	circRNA	TCTATCTCACAATGGGATTCTCTCCAGCCTTGGTGGTGACATCAATGGTTCATGAACCAT	NA	NA	NA	NA	NA	NA	NA	NA	NA	NA	NA	---	NA	NA	hsa_circ_0044702	chr17	53478829	53491593	-	12764	490	NM_012329	MMD
hsa_circ_0001990	0.00255924	5.8522	5.50131	5.67716	5.41833	P	P	P	3.36027	2.76232	2.752	P	P	P	hsa_circ_0001990	circRNA	CAGGAATTTGAAAGTGATTATTTTTCTGTTGCCCACTTTTCAATATGAAGGAGGATCAAG	NA	NA	NA	NA	NA	NA	NA	NA	NA	NA	NA	---	NA	NA	hsa_circ_0001990	chr22	38958291	38964294	-	6003	359	NM_007068	DMC1
hsa_circ_0023996	0.00166695	5.84	3.2091	3.95888	3.90221	P	P	P	0.870625	1.44419	1.17432	A	A	A	hsa_circ_0023996	circRNA	TGTTACTCAGGATGGAAGTATGATGTGATGGATATAATTATGGGACACTGTGTGGGCACA	NA	NA	NA	NA	NA	NA	NA	NA	NA	NA	NA	---	NA	NA	hsa_circ_0023996	chr11	92085261	92507346	+	422085	4352	NM_001008781	FAT3
hsa_circ_0001055	0.00231916	5.8378	6.48108	6.3168	6.12504	P	P	P	3.30078	4.00543	3.90671	P	P	P	hsa_circ_0001055	circRNA	GCAGGGGGAGTGTCTATGAACCAGATAGAAATGCATTACGGAGGAAAGAACGAGAAAGAA	NA	NA	NA	NA	NA	NA	NA	NA	NA	NA	NA	---	NA	NA	hsa_circ_0001055	chr2	100623093	100625394	-	2301	820	NM_001025108	AFF3
hsa_circ_0078043	0.000462865	5.83455	6.44702	6.2129	6.13854	P	P	P	3.55692	3.556	4.01889	P	P	P	hsa_circ_0078043	circRNA	TAAATCCAGCTCTACCACCTATTTCAAAAGGAATAGCCACACAGTGTGGGGATGTGCCAA	NA	NA	NA	NA	NA	NA	NA	NA	NA	NA	NA	---	NA	NA	hsa_circ_0078043	chr6	142688705	142759501	+	70796	3471	NM_020455	GPR126
hsa_circ_0004536	0.00152652	5.81728	6.18844	5.68938	5.83618	P	P	P	3.58881	2.88337	3.56285	P	P	P	hsa_circ_0004536	circRNA	TCAATCTGTGTCAACTTTGACCATTTTCAGATTCTGCGGGCCATTGGTAAAGGGAGTTTT	NA	NA	NA	NA	NA	NA	NA	NA	NA	NA	NA	PARL	NA	NA	hsa_circ_0004536	chr4	5141631	5170177	+	28546	208	NM_018401	STK32B
hsa_circ_0073567	0.0191152	5.80052	4.73807	4.88463	4.73499	P	P	P	1.44346	2.754	2.26873	A	P	A	hsa_circ_0073567	circRNA	GATGCACCACTCAAAATCGTATCTACATGAAAATGGGATTGTCCATCGTGATCTCAAACC	NA	NA	NA	NA	NA	NA	NA	NA	NA	NA	NA	---	NA	NA	hsa_circ_0073567	chr5	110782383	110782474	+	91	91	NM_001744	CAMK4
hsa_circ_0014230	2.53788e-05	5.79934	10.8518	11.118	11.053	P	P	P	8.6181	8.46417	8.33179	P	P	P	hsa_circ_0014230	circRNA	GGAGCTGCCCAGCTTCTTGGGGATTCTTCCCCTCTCTACAACCCTCTCTCCTCAGCGCTT	NA	NA	NA	NA	NA	NA	NA	NA	NA	NA	NA	LOC100689008	NA	NA	hsa_circ_0014230	chr1	153517129	153518282	-	1153	259	NM_019554	S100A4
hsa_circ_0032974	0.00116677	5.78218	9.64101	9.60064	9.64085	P	P	P	7.23021	7.13124	6.90797	P	P	P	hsa_circ_0032974	circRNA	ATATGAACTTGAGGAAGATGGCGTTCATTGCAGTGATGTGGACGAGTGTGCAACAGATTC	NA	NA	NA	NA	NA	NA	NA	NA	NA	NA	NA	---	NA	NA	hsa_circ_0032974	chr14	92353536	92361416	-	7880	360	NM_006329	FBLN5
hsa_circ_0086677	0.0246211	5.74991	3.5801	4.2374	4.34345	P	P	P	0.314583	1.86625	2.00052	A	A	A	hsa_circ_0086677	circRNA	CCGAGGATTATGCTTTTTGTTGTGATTTGAGAAGGACTGTTCTACATTTGGCCTGTGCCC	NA	NA	NA	NA	NA	NA	NA	NA	NA	NA	NA	---	NA	NA	hsa_circ_0086677	chr9	33528724	33534505	+	5781	534	NM_001244752	ANKRD18B
hsa_circ_0046337	0.0495014	5.74159	7.47427	9.06602	9.1392	P	P	P	6.1818	6.22632	6.23	P	P	P	hsa_circ_0046337	circRNA	ATTAAACCGCATGTGATCTCCAAGCAGCCATGGAGGAGGTGGTGATTGCCGGCATGTCCG	NA	NA	NA	NA	NA	NA	NA	NA	NA	NA	NA	---	NA	NA	hsa_circ_0046337	chr17	80036213	80054328	-	18115	8348	NM_004104	FASN
hsa_circ_0055852	0.0093342	5.74089	4.76944	4.81337	4.80555	P	P	P	2.23834	1.7923	2.6639	A	A	P	hsa_circ_0055852	circRNA	ACATCAACAGGGGTGAAGACATCTTAAACCAGAGGAATGACTCTCTAGTTGTGGAATTTC	NA	NA	NA	NA	NA	NA	NA	NA	NA	NA	NA	---	NA	NA	hsa_circ_0055852	chr2	100203615	100628033	-	424418	2613	NM_001025108	AFF3
hsa_circ_0069997	0.000899316	5.73699	8.43321	8.30132	8.28417	P	P	P	5.99432	5.87085	5.564	P	P	P	hsa_circ_0069997	circRNA	AATACCTGGCTATATTGTCGATGATTCAGTCAGAGGCCATTATGCTGCTGGATTGGACCT	NA	NA	NA	NA	NA	NA	NA	NA	NA	NA	NA	---	NA	NA	hsa_circ_0069997	chr4	75482005	75482254	+	249	249	NM_001657	AREG
hsa_circ_0068489	0.00527146	5.73496	7.17076	7.96663	7.86037	P	P	P	5.34755	5.0495	5.14682	P	P	P	hsa_circ_0068489	circRNA	AAATAAACCCTCGTGGATAACCAACAGTGGCTGCTTCTCTATTATGCTCTGTGCTTCTCC	NA	NA	NA	NA	NA	NA	NA	NA	NA	NA	NA	---	NA	NA	hsa_circ_0068489	chr3	186951869	187003844	-	51975	3784	NM_139125	MASP1
hsa_circ_0019247	0.00321769	5.73275	7.23913	7.58897	7.89443	P	P	P	5.18207	5.06298	4.98688	P	P	P	hsa_circ_0019247	circRNA	TTTTGTTTTTACTCAATAAATGTATAGACTACAATGGTGTGTTTGTGAAGCTGCGGGACC	NA	NA	NA	NA	NA	NA	NA	NA	NA	NA	NA	Cdk12	NA	NA	hsa_circ_0019247	chr10	96997329	96997868	-	539	539	NM_020992	PDLIM1
hsa_circ_0032874	0.00145911	5.71088	2.83186	2.38197	2.69151	P	P	P	0.114546	0.0762431	0.206283	A	A	A	hsa_circ_0032874	circRNA	TTAAGAAAAGCGCTTGGTTTCAGTTGGACTTGATTCAAAGAATGCAGTTTGTGTTTGGGA	NA	NA	NA	NA	NA	NA	NA	NA	NA	NA	NA	---	NA	NA	hsa_circ_0032874	chr14	89178614	89212627	-	34013	1300	NM_183387	EML5
hsa_circ_0070184	0.00488358	5.69977	3.15284	3.27712	2.80288	P	P	P	0.243522	1.10296	0.206283	A	A	A	hsa_circ_0070184	circRNA	AGATGCCCAGGAACTGATGAGAAAATGCTCATCAGCATTCTGACTGAGAGGTCAAATGCA	NA	NA	NA	NA	NA	NA	NA	NA	NA	NA	NA	---	NA	NA	hsa_circ_0070184	chr4	79500180	79516591	+	16411	437	NM_005139	ANXA3
hsa_circ_0004864	2.47065e-05	5.69482	7.37917	7.63987	7.50587	P	P	P	4.93615	5.1091	4.95621	P	P	P	hsa_circ_0004864	circRNA	TTCCTACATGGGACTTGAAGTTGGACGGAGGAAGACAATCAACTGGTGCAGTGAGTTTGA	NA	NA	NA	NA	NA	NA	NA	NA	NA	NA	NA	---	NA	NA	hsa_circ_0004864	chr18	20814571	20817209	+	2638	358	NM_001100619	CABLES1
hsa_circ_0087186	0.000508362	5.69052	2.53104	2.59859	2.83889	P	P	P	0.154801	0.0981698	0.206283	A	A	A	hsa_circ_0087186	circRNA	GATAAAGACTGAACTTACTCATTTGTGTTTATTCTTGGACTTATCCTGACATAATGGGGT	NA	NA	NA	NA	NA	NA	NA	NA	NA	NA	NA	---	NA	NA	hsa_circ_0087186	chr9	72999512	73029573	-	30061	5208	NM_001206	KLF9
hsa_circ_0068487	0.00357405	5.67168	6.25995	6.26511	6.22728	P	P	P	3.88043	3.89081	3.42236	P	P	P	hsa_circ_0068487	circRNA	AAATCATCCTGGATCAAAGTTGGTCCAAAAGTTTTGGGGCCTTTCTGTGGAGAGAAAGCC	NA	NA	NA	NA	NA	NA	NA	NA	NA	NA	NA	---	NA	NA	hsa_circ_0068487	chr3	186944194	186971103	-	26909	811	NM_001879	MASP1
hsa_circ_0047300	0.00209754	5.66889	6.64151	7.38759	7.45923	P	P	P	4.63526	5.05423	4.3302	P	P	P	hsa_circ_0047300	circRNA	AGAAGTTTTTCTTCCAAACAGAGCTGCAGATGAAGGACTGAACCATGAATGCAAACTCTG	NA	NA	NA	NA	NA	NA	NA	NA	NA	NA	NA	---	NA	NA	hsa_circ_0047300	chr18	22669428	22672045	-	2617	248	NM_015461	ZNF521
hsa_circ_0025763	8.54097e-05	5.66483	6.17804	6.27005	6.32803	P	P	P	3.775	3.88047	3.60526	P	P	P	hsa_circ_0025763	circRNA	AGCCTTTAAGGTATCTGAGAGCAAGCAGCAATAGAAATTTCCTGCTTACCATGAGACCAT	NA	NA	NA	NA	NA	NA	NA	NA	NA	NA	NA	RSPH3	NA	NA	hsa_circ_0025763	chr12	29786079	29813818	-	27739	27739	NM_175861	TMTC1
hsa_circ_0030004	0.000780726	5.64644	7.47444	7.71929	7.80298	P	P	P	5.13444	5.22686	5.16166	P	P	P	hsa_circ_0030004	circRNA	AAGATGTGTACTATCCGGATGAGTTTTGTTAAGAGTTGGCCACCCTGTTCAAGGGCTTAG	NA	NA	NA	NA	NA	NA	NA	NA	NA	NA	NA	MS4A1	NA	NA	hsa_circ_0030004	chr13	37427555	37454012	-	26457	1446	NM_001127217	SMAD9
hsa_circ_0030589	2.92957e-06	5.63669	8.85663	8.7954	8.76315	P	P	P	6.26232	6.27849	6.3881	P	P	P	hsa_circ_0030589	circRNA	TAACCGAGAAGCTAGATCTTAACTGGTACTTAGGAATTTATTCAGGAGCGGACAGGCGTG	NA	NA	NA	NA	NA	NA	NA	NA	NA	NA	NA	---	NA	NA	hsa_circ_0030589	chr13	95815375	95953687	-	138312	2427	NM_005845	ABCC4
hsa_circ_0030585	7.31408e-06	5.62595	7.70224	7.69323	7.53575	P	P	P	5.17901	5.20406	5.07461	P	P	P	hsa_circ_0030585	circRNA	AAATCCAATAGGATTTACAGCTGTTGGAGGATGGTGATCTGACTGTGATAGGAGATCGGG	NA	NA	NA	NA	NA	NA	NA	NA	NA	NA	NA	---	NA	NA	hsa_circ_0030585	chr13	95813442	95830345	-	16903	910	NM_005845	ABCC4
hsa_circ_0073188	4.56495e-06	5.6147	6.91612	6.84568	6.76224	P	P	P	4.31003	4.28871	4.45597	P	P	P	hsa_circ_0073188	circRNA	CATCAGTCAGCTGATCTGTTTGATATTTTGCTCCCCATGCTGAACATTTATCAAGAATTT	NA	NA	NA	NA	NA	NA	NA	NA	NA	NA	NA	Hecw1	NA	NA	hsa_circ_0073188	chr5	80376414	80390811	+	14397	788	NM_006909	RASGRF2
hsa_circ_0074950	0.00160957	5.6125	3.68626	3.32986	3.55584	P	P	P	0.949202	1.39183	0.700988	A	A	A	hsa_circ_0074950	circRNA	CATTCTGATTGAAATTGATGACAGTGCTGAAGACTTACTTGGATACCTCCAGCAGAGGGG	NA	NA	NA	NA	NA	NA	NA	NA	NA	NA	NA	---	NA	NA	hsa_circ_0074950	chr5	169145660	169267856	+	122196	667	NM_004946	DOCK2
hsa_circ_0030600	4.67585e-06	5.61032	7.95919	7.85973	7.77413	P	P	P	5.37971	5.29316	5.45721	P	P	P	hsa_circ_0030600	circRNA	TAGATGCGGAAGTTAGCAGACACTTGTTCGAACTGTGACAGTGTTCTTACACTTCCTGTG	NA	NA	NA	NA	NA	NA	NA	NA	NA	NA	NA	---	NA	NA	hsa_circ_0030600	chr13	95829960	95861851	-	31891	1106	NM_005845	ABCC4
hsa_circ_0042079	0.0180055	5.60975	5.47403	5.46775	5.53125	P	P	P	2.71751	3.5989	2.42278	P	P	A	hsa_circ_0042079	circRNA	AACTTAGCTAAGCTCTCTCAGAACTCCTTGGCTTCACAGGAGGAAGGATAAACTGTGTGA	NA	NA	NA	NA	NA	NA	NA	NA	NA	NA	NA	---	NA	NA	hsa_circ_0042079	chr17	9843442	9850300	-	6858	281	NM_201433	GAS7
hsa_circ_0036782	0.048376	5.58603	3.58854	5.56305	5.26274	P	P	P	3.00381	2.25542	2.23077	P	A	A	hsa_circ_0036782	circRNA	TTTCCTTACAACAAAATAAAGTAAAATGTAGCAGTCTGCGTCGGGCAGCCCAAATGTGTG	NA	NA	NA	NA	NA	NA	NA	NA	NA	NA	NA	Snord99	NA	NA	hsa_circ_0036782	chr15	90796480	90815443	+	18963	14338	NM_001029964	TTLL13
hsa_circ_0016916	0.0439304	5.58586	4.3497	4.43648	4.4891	P	P	P	2.51495	2.11323	0.589154	A	A	A	hsa_circ_0016916	circRNA	TGTGTTATAGCTTACAACACTGAGAGGAGCAATTTTAGAAGATGCTATACCCTCTACTGC	NA	NA	NA	NA	NA	NA	NA	NA	NA	NA	NA	Mgll	NA	NA	hsa_circ_0016916	chr1	232607116	232626808	-	19692	626	NM_020808	SIPA1L2
hsa_circ_0028304	0.00270555	5.56627	5.8572	5.69301	5.94876	P	P	P	2.93855	3.56406	3.49967	P	P	P	hsa_circ_0028304	circRNA	CAAGGAGGAGATTTTCATAAACAATGAATGGCACGATGCCGTCAGCAGGAAAACATTCCC	NA	NA	NA	NA	NA	NA	NA	NA	NA	NA	NA	---	NA	NA	hsa_circ_0028304	chr12	112219721	112236046	+	16325	1134	NM_000690	ALDH2
hsa_circ_0070805	0.00201011	5.54892	5.30705	6.12825	5.99914	P	P	P	2.95743	3.38169	3.709	P	P	P	hsa_circ_0070805	circRNA	AAGAAACAAGAGAGCTACAGTCGTTAGCGAGAAATGGTCAATGCATGGTTTGCTGAGAGA	NA	NA	NA	NA	NA	NA	NA	NA	NA	NA	NA	CD9	NA	NA	hsa_circ_0070805	chr4	120460114	120528452	-	68338	1480	NM_001083	PDE5A
hsa_circ_0025764	0.00159179	5.53193	7.3488	7.35679	7.36175	P	P	P	4.73305	4.83984	5.0703	P	P	P	hsa_circ_0025764	circRNA	AGCCTTTAAGGCTAAACATATTTTTGACTGGTATGAACCCATTCTACTTTCATGCAGTAA	NA	NA	NA	NA	NA	NA	NA	NA	NA	NA	NA	RSPH3	NA	NA	hsa_circ_0025764	chr12	29786079	29921008	-	134929	826	NM_175861	TMTC1
hsa_circ_0079544	0.00510567	5.52957	6.60976	6.72462	6.7667	P	P	P	3.79914	4.49427	4.3235	P	P	P	hsa_circ_0079544	circRNA	GAACAACAGCATTATGTCGACCAAACTTCAGGTTCTTTTCAATGTAACAGTTACAATGAA	NA	NA	NA	NA	NA	NA	NA	NA	NA	NA	NA	---	NA	NA	hsa_circ_0079544	chr7	20441343	20445794	+	4451	742	NM_002214	ITGB8
hsa_circ_0030572	2.24706e-05	5.52275	8.5374	8.40971	8.58253	P	P	P	5.90326	6.14164	6.08353	P	P	P	hsa_circ_0030572	circRNA	CAAGATAATGGAACCTGTTTTGTTCACTGGAACAATGAGGAAAAACCTGGATCCCTTTAA	NA	NA	NA	NA	NA	NA	NA	NA	NA	NA	NA	---	NA	NA	hsa_circ_0030572	chr13	95695935	95705438	-	9503	369	NM_005845	ABCC4
hsa_circ_0056271	0.00170153	5.51876	2.6504	3.24299	3.39971	P	P	P	0.654653	1.02687	0.206283	A	A	A	hsa_circ_0056271	circRNA	TAGGGGAACCTGAAGTTGAATATGAGACATTGGTTGGATGGTACAAAAAGCATCAAAAAG	NA	NA	NA	NA	NA	NA	NA	NA	NA	NA	NA	---	NA	NA	hsa_circ_0056271	chr2	120830753	120885427	+	54674	1216	NM_020909	EPB41L5
hsa_circ_0081909	0.0275401	5.51798	10.0019	11.2597	11.2573	P	P	P	8.52925	8.34731	8.5647	P	P	P	hsa_circ_0081909	circRNA	ATACTGTGAAGCAAAGTGCAGAAGATGTTAAGAAGGTGCTTGGCTGGTTACTATGGCGAC	NA	NA	NA	NA	NA	NA	NA	NA	NA	NA	NA	---	NA	NA	hsa_circ_0081909	chr7	107566627	107596075	-	29448	2374	NM_002291	LAMB1
hsa_circ_0078040	0.000418232	5.51667	6.81711	6.56342	6.83813	P	P	P	4.5567	4.1235	4.11762	P	P	P	hsa_circ_0078040	circRNA	CTCTGTCAAGTGTGGGGATGTGCCAACTGCCGAGTGGTTTTGTCCAACCCTTCTGGGACC	NA	NA	NA	NA	NA	NA	NA	NA	NA	NA	NA	---	NA	NA	hsa_circ_0078040	chr6	142688705	142703156	+	14451	1035	NM_020455	GPR126
hsa_circ_0036081	0.000161053	5.50625	6.67368	6.3865	6.56501	P	P	P	3.99158	4.31312	3.92074	P	P	P	hsa_circ_0036081	circRNA	GCTACTCCAGGTTCTTTGCATGGAGGTTTGTGACTGCACTGTATATGACAGACATCAAGA	NA	NA	NA	NA	NA	NA	NA	NA	NA	NA	NA	C3H9orf89	NA	NA	hsa_circ_0036081	chr15	69677015	69682119	+	5104	333	NM_001104554	PAQR5
hsa_circ_0087704	0.0428842	5.50116	3.50309	5.26799	5.40976	P	P	P	2.92589	2.53492	1.76474	P	P	A	hsa_circ_0087704	circRNA	TCTAATATTTGGTTTAATAAAATGTGAATAATGTCCCTTTTACGCGCGCACGCCCACGCT	NA	NA	NA	NA	NA	NA	NA	NA	NA	NA	NA	Sik3	NA	NA	hsa_circ_0087704	chr9	100846636	100850287	-	3651	3651	NM_014788	TRIM14
hsa_circ_0030566	6.26977e-06	5.50035	8.13548	8.01675	7.96859	P	P	P	5.65025	5.53314	5.5614	P	P	P	hsa_circ_0030566	circRNA	TCCATTCAGAGGTAAAATGGTGCAGAAGGGGACTTACACTGAGTTCCTAAAATCTGGTAT	NA	NA	NA	NA	NA	NA	NA	NA	NA	NA	NA	---	NA	NA	hsa_circ_0030566	chr13	95672082	95818621	-	146539	3900	NM_005845	ABCC4
hsa_circ_0087134	0.020232	5.50019	2.66542	4.06346	4.01486	P	P	P	1.62078	0.847613	1.17468	A	A	A	hsa_circ_0087134	circRNA	GGATAGGGCCCAAAGCAGTATCATAACTATTGTGGATTCAAAATATGGATTAAAAGTAAG	NA	NA	NA	NA	NA	NA	NA	NA	NA	NA	NA	Ago2	NA	NA	hsa_circ_0087134	chr9	70873447	70874350	+	903	903	---	---
hsa_circ_0083682	0.00198126	5.49728	5.85099	5.96826	5.66001	P	P	P	3.10495	3.73676	3.19395	P	P	P	hsa_circ_0083682	circRNA	TCACAGCAGTACTTGCTCAATAAAGGTCATATTGGAAACATAGCTGTGACAGCCACACGC	NA	NA	NA	NA	NA	NA	NA	NA	NA	NA	NA	---	NA	NA	hsa_circ_0083682	chr8	24771273	24776606	+	5333	3271	NM_005382	NEFM
hsa_circ_0074577	0.00448919	5.48657	10.1393	10.6969	10.7967	P	P	P	8.00456	8.15066	8.18646	P	P	P	hsa_circ_0074577	circRNA	TAAAAGCCTTTCTGCAGCAGCTGAAACTCCTGTCCTCCCACCTCGGAGCTCCTGGGTACA	NA	NA	NA	NA	NA	NA	NA	NA	NA	NA	NA	---	NA	NA	hsa_circ_0074577	chr5	150407469	150408554	+	1085	1085	NM_002084	GPX3
hsa_circ_0057940	0.00574572	5.48385	3.08237	3.67627	2.98575	P	P	P	0.672638	0.199372	1.36629	A	A	A	hsa_circ_0057940	circRNA	AACCAGTGTCAGTACATCTGGGGAACAACTATTTGAGCCCACGGAATGTGGAAATGGATA	NA	NA	NA	NA	NA	NA	NA	NA	NA	NA	NA	---	NA	NA	hsa_circ_0057940	chr2	207435463	207452878	+	17415	358	NM_003812	ADAM23
hsa_circ_0046755	0.00436024	5.48102	3.27552	2.64039	3.28042	P	P	P	0.300924	1.19621	0.206283	A	A	A	hsa_circ_0046755	circRNA	AACCATCACATATGAATCATCACAGACTCGGAATCCAAGCCGGACCAGGAGGCCGAGCCC	NA	NA	NA	NA	NA	NA	NA	NA	NA	NA	NA	---	NA	NA	hsa_circ_0046755	chr18	5396199	5489160	-	92961	2951	NM_012307	EPB41L3
hsa_circ_0040638	0.000669165	5.47721	5.79672	6.38055	6.19847	P	P	P	3.52655	3.62475	3.89815	P	P	P	hsa_circ_0040638	circRNA	ATTTGCTCTGTAATAAAAATCTACTTTCACATAATGTGCGGTGAGGCTCGCGGCCGGAGT	NA	NA	NA	NA	NA	NA	NA	NA	NA	NA	NA	---	NA	NA	hsa_circ_0040638	chr16	82181766	82203829	-	22063	1101	NM_005792	MPHOSPH6
hsa_circ_0047666	0.00121575	5.47059	5.0298	4.92438	5.14945	P	P	P	2.74454	2.70361	2.26128	A	P	A	hsa_circ_0047666	circRNA	ATGCCTTTCAGAGATAAGCTCCACAAACCCAAAGCTACACAGACTGAGGTCAAACCATCT	NA	NA	NA	NA	NA	NA	NA	NA	NA	NA	NA	---	NA	NA	hsa_circ_0047666	chr18	47091686	47108027	+	16341	939	NM_006033	LIPG
hsa_circ_0038074	0.0318874	5.47054	3.39655	4.50873	4.57736	P	P	P	0.349822	2.12785	2.26464	A	A	A	hsa_circ_0038074	circRNA	TGAGATCCAAAATTATGACAGCCTTAAAAGAGGACTGGAATGTCACGTGGAATACCAGCA	NA	NA	NA	NA	NA	NA	NA	NA	NA	NA	NA	---	NA	NA	hsa_circ_0038074	chr16	16101672	16108485	+	6813	441	NM_004996	ABCC1
hsa_circ_0078553	0.00513713	5.45835	5.7621	6.79665	6.67859	P	P	P	4.27565	4.20294	3.49719	P	P	P	hsa_circ_0078553	circRNA	CATAAAGCAAGCTCTGAAAATGTAGCCAAAAAATGGCAAGTGAGTAGAGAAGATCAGGAC	NA	NA	NA	NA	NA	NA	NA	NA	NA	NA	NA	---	NA	NA	hsa_circ_0078553	chr6	160196201	160198488	+	2287	422	NM_005891	ACAT2
hsa_circ_0007470	7.21831e-05	5.45622	8.39006	8.1403	8.06665	P	P	P	5.76175	5.87231	5.62927	P	P	P	hsa_circ_0007470	circRNA	AATCCAATAGGGTAAAATGGTGCAGAAGGGGACTTACACTGAGTTCCTAAAATCTGGTAT	NA	NA	NA	NA	NA	NA	NA	NA	NA	NA	NA	---	NA	NA	hsa_circ_0007470	chr13	95813442	95818621	-	5179	631	NM_005845	ABCC4
hsa_circ_0012576	0.0128469	5.45574	3.85585	3.57542	3.64748	P	P	P	1.80595	0.680526	1.02607	A	A	A	hsa_circ_0012576	circRNA	GGCAGTTAAGGTTTGATGCTGCCAAGTTTGTCATGAGATGGCTCTGTAAGCATGAAAACC	NA	NA	NA	NA	NA	NA	NA	NA	NA	NA	NA	---	NA	NA	hsa_circ_0012576	chr1	53333210	53333449	+	239	151	NM_001004339	ZYG11A
hsa_circ_0048893	0.0188419	5.43655	3.60424	3.54459	3.62581	P	P	P	1.33759	0.366374	1.50469	A	A	A	hsa_circ_0048893	circRNA	ATTCTGGCTGTGAGCATGTCGGACAAGAAAGGTGCGCACGAAGAAGCAGGAGCTCTCGGA	NA	NA	NA	NA	NA	NA	NA	NA	NA	NA	NA	---	NA	NA	hsa_circ_0048893	chr19	6702137	6711207	-	9070	1171	NM_000064	C3
hsa_circ_0028307	0.000499936	5.43019	8.21261	7.83218	7.75174	P	P	P	5.52604	5.35188	5.62554	P	P	P	hsa_circ_0028307	circRNA	GATGCCGATAATTGGCCGCGTAATCCAGGTTGCTGCTGGGAGCAGCAACCTCAAGAGAGT	NA	NA	NA	NA	NA	NA	NA	NA	NA	NA	NA	---	NA	NA	hsa_circ_0028307	chr12	112229864	112229967	+	103	103	NM_000690	ALDH2
hsa_circ_0000401	0.0025412	5.42683	5.13524	5.01539	5.30406	P	P	P	2.35319	3.05216	2.6581	A	P	P	hsa_circ_0000401	circRNA	GTGCAGAAAGTCGTAGAGGGAGCCGTGCTCGTGGTAGTGCGTGATGAGCCACAGCTGCGT	NA	NA	NA	NA	NA	NA	NA	NA	NA	NA	NA	---	NA	NA	hsa_circ_0000401	chr12	52308994	52309096	-	102	102	NM_001077401	ACVRL1
hsa_circ_0023999	0.0331556	5.42343	3.72583	3.40592	3.75173	P	P	P	0.239564	2.00981	0.73967	A	A	A	hsa_circ_0023999	circRNA	CCCAAGACAGGATGGAAGTATGATGTGATGGATATAATTATGGGACACTGTGTGGGCACA	NA	NA	NA	NA	NA	NA	NA	NA	NA	NA	NA	---	NA	NA	hsa_circ_0023999	chr11	92085261	92565177	+	479916	9888	NM_001008781	FAT3
hsa_circ_0029023	0.00135664	5.42071	2.8793	2.9048	3.47448	P	P	P	0.977243	0.737312	0.206283	A	A	A	hsa_circ_0029023	circRNA	CCCGGTCCAAGGTTTTGGAGCCGGCAACTTCAACTCACTGTTCAAGGCTTTCGAGGAGGA	NA	NA	NA	NA	NA	NA	NA	NA	NA	NA	NA	---	NA	NA	hsa_circ_0029023	chr12	122277432	122277744	-	312	312	NM_001171993	HPD
hsa_circ_0091352	0.000351547	5.39914	4.88898	4.65608	4.67921	P	P	P	2.15678	2.18621	2.55891	A	A	P	hsa_circ_0091352	circRNA	ATATTTCAAGCCCTTAGAAAATCAGAAGGATCAAATAGATGAACAACCGTGGCCAGAATC	NA	NA	NA	NA	NA	NA	NA	NA	NA	NA	NA	---	NA	NA	hsa_circ_0091352	chrX	114384389	114384506	-	117	117	NM_020871	LRCH2
hsa_circ_0060926	0.0149475	5.3842	3.37745	3.65144	3.40204	P	P	P	1.05782	0.320699	1.53438	A	A	A	hsa_circ_0060926	circRNA	AATACGCCTCAGGTCTTGGCCGATTTTATGGGCAGAATAGATGAGCTCTGTGATGAAAGA	NA	NA	NA	NA	NA	NA	NA	NA	NA	NA	NA	---	NA	NA	hsa_circ_0060926	chr20	52773707	52786227	-	12520	1012	NM_000782	CYP24A1
hsa_circ_0041373	0.000125672	5.38373	11.4801	11.6885	11.6399	P	P	P	9.33838	9.18297	8.98832	P	P	P	hsa_circ_0041373	circRNA	ATTTTCTATACTCGAACCAAACAGCAATAAAGCAGTAACCAAGGACTCAGGTGCGCGGGA	NA	NA	NA	NA	NA	NA	NA	NA	NA	NA	NA	---	NA	NA	hsa_circ_0041373	chr17	1958262	1962981	+	4719	3287	NM_006497	HIC1
hsa_circ_0069357	0.00204443	5.37254	5.68425	5.66097	5.91651	P	P	P	3.68197	3.06869	3.17093	P	P	P	hsa_circ_0069357	circRNA	TTGACTACCAGCATGAAGCTTTGCTGTATTATGTTTTAGCAGCAGAAACTGGAATTGAAG	NA	NA	NA	NA	NA	NA	NA	NA	NA	NA	NA	LRP6	NA	NA	hsa_circ_0069357	chr4	25749048	25769452	-	20404	1728	NM_015187	SEL1L3
hsa_circ_0027498	0.00150512	5.36015	5.52978	5.33226	5.44185	P	P	P	3.19322	2.69758	3.10613	P	P	P	hsa_circ_0027498	circRNA	TGTCACTCACTTACACAGTATTGGGAAATCTGTGAAAGAACATGGACTTCCCGTGCCTCT	NA	NA	NA	NA	NA	NA	NA	NA	NA	NA	NA	---	NA	NA	hsa_circ_0027498	chr12	69326457	69326620	-	163	163	NM_001874	CPM
hsa_circ_0019061	8.60277e-05	5.35744	7.31063	7.35	7.41102	P	P	P	5.04846	4.92202	4.82995	P	P	P	hsa_circ_0019061	circRNA	GCTGTTCAGTATGAAGTGATTGAGAAGAAACAGTGAACATCCTCATTTCACAGATAAGAC	NA	NA	NA	NA	NA	NA	NA	NA	NA	NA	NA	otx1b	NA	NA	hsa_circ_0019061	chr10	90661412	90682193	+	20781	1307	NM_020799	STAMBPL1
hsa_circ_0087706	0.036449	5.35054	3.74939	3.43087	3.10094	P	P	P	0.167672	0.181778	1.95423	A	A	A	hsa_circ_0087706	circRNA	TCGCTATTGCTGAAATGCATACACGGCCACCGAGCAGGAGATGCAGCAGCAGATGAGCCT	NA	NA	NA	NA	NA	NA	NA	NA	NA	NA	NA	Sik3	NA	NA	hsa_circ_0087706	chr9	100854190	100857311	-	3121	256	NM_014788	TRIM14
hsa_circ_0036082	0.00045799	5.34894	7.93114	7.69031	7.73145	P	P	P	5.37795	5.33021	5.39782	P	P	P	hsa_circ_0036082	circRNA	TTATTTATTATGTCACAGTCACCAGCTGTTTCACGTGTGTGTGATCCTGGCCACGCACAT	NA	NA	NA	NA	NA	NA	NA	NA	NA	NA	NA	C430049B03Rik	NA	NA	hsa_circ_0036082	chr15	69695919	69699976	+	4057	4057	NM_001104554	PAQR5
hsa_circ_0030575	0.000174256	5.34627	8.28089	8.098	8.13985	P	P	P	5.7849	5.75951	5.72453	P	P	P	hsa_circ_0030575	circRNA	CTTACAAGAGGGTAAAATGGTGCAGAAGGGGACTTACACTGAGTTCCTAAAATCTGGTAT	NA	NA	NA	NA	NA	NA	NA	NA	NA	NA	NA	---	NA	NA	hsa_circ_0030575	chr13	95705348	95818621	-	113273	1632	NM_005845	ABCC4
hsa_circ_0034336	0.0186607	5.3428	3.74017	3.39651	3.41633	P	P	P	0.262126	1.09977	1.6452	A	A	A	hsa_circ_0034336	circRNA	AAACATGAATGCAAGCATTGGCGTGGAGCTCATGAAGGACTTCAGCATTTGGGTCCTTTT	NA	NA	NA	NA	NA	NA	NA	NA	NA	NA	NA	LOC103187813	NA	NA	hsa_circ_0034336	chr15	32971966	32989298	+	17332	901	NM_001144757	SCG5
hsa_circ_0030591	3.40265e-05	5.34223	8.17221	7.96114	8.1129	P	P	P	5.7621	5.49961	5.72655	P	P	P	hsa_circ_0030591	circRNA	TTTTCCTTATTCTCCTAAACACTGCAGCTCAGGAGTAAAACTGCAACTTTCACGGATGCC	NA	NA	NA	NA	NA	NA	NA	NA	NA	NA	NA	---	NA	NA	hsa_circ_0030591	chr13	95816631	95860179	-	43548	1390	NM_005845	ABCC4
hsa_circ_0030588	0.000222206	5.33794	6.55486	6.40947	6.3379	P	P	P	3.80617	4.0422	4.1881	P	P	P	hsa_circ_0030588	circRNA	TTAGGAATTTATTCAGGCACTTCGTCTTAGTAACATGGCCATGGGGAAGACAACCACAGG	NA	NA	NA	NA	NA	NA	NA	NA	NA	NA	NA	---	NA	NA	hsa_circ_0030588	chr13	95815375	95863035	-	47660	1777	NM_005845	ABCC4
hsa_circ_0082898	0.000163137	5.32847	13.6015	13.4243	13.4408	P	P	P	11.0564	11.0601	11.1149	P	P	P	hsa_circ_0082898	circRNA	TAATAAAGCTGCTCTCCCAGCTGCCTCTCAGCCGCCCCGCGAGAAGAAGAGCGGGAAGAG	NA	NA	NA	NA	NA	NA	NA	NA	NA	NA	NA	HDAC2	NA	NA	hsa_circ_0082898	chr7	150035406	150038763	-	3357	741	NM_002889	RARRES2
hsa_circ_0048867	0.0303816	5.32732	3.98142	5.40703	5.59192	P	P	P	3.05255	2.2771	2.77391	P	A	P	hsa_circ_0048867	circRNA	ACTCCAGATAAAGCTTCAGTTATATCTCATTCTCTATCGGATCTTCACCGTCAACCACAA	NA	NA	NA	NA	NA	NA	NA	NA	NA	NA	NA	---	NA	NA	hsa_circ_0048867	chr19	6677845	6718175	-	40330	4606	NM_000064	C3
hsa_circ_0087324	0.000533737	5.32695	5.72605	5.89865	5.86466	P	P	P	3.17651	3.56069	3.48972	P	P	P	hsa_circ_0087324	circRNA	AATGAGCTTGACTGAAATCGCCAAGAGATTGAATACGATTTGTGCACAAGTCATCCCATT	NA	NA	NA	NA	NA	NA	NA	NA	NA	NA	NA	REST	NA	NA	hsa_circ_0087324	chr9	84230896	84268951	-	38055	684	NM_005077	TLE1
hsa_circ_0025768	0.00259594	5.30803	7.68109	7.57734	7.5034	P	P	P	5.21379	5.42472	4.84612	P	P	P	hsa_circ_0025768	circRNA	CCATGATGAGGCTAAACATATTTTTGACTGGTATGAACCCATTCTACTTTCATGCAGTAA	NA	NA	NA	NA	NA	NA	NA	NA	NA	NA	NA	Rspry1	NA	NA	hsa_circ_0025768	chr12	29904598	29921008	-	16410	636	NM_175861	TMTC1
hsa_circ_0074951	0.000420942	5.30265	3.87452	3.79862	4.08297	P	P	P	1.22209	1.62524	1.66379	A	A	A	hsa_circ_0074951	circRNA	TAAAAAGCAAGGCTTTATGAAGGCAAAGAACAGATGGAGTTTGAAGAATCCATGAGACGG	NA	NA	NA	NA	NA	NA	NA	NA	NA	NA	NA	---	NA	NA	hsa_circ_0074951	chr5	169174399	169188629	+	14230	287	NM_004946	DOCK2
hsa_circ_0016293	2.84463e-05	5.30061	8.82623	8.67224	8.84989	P	P	P	6.44535	6.45588	6.22328	P	P	P	hsa_circ_0016293	circRNA	TCCTCCTTAAAGAAATCATGCCCTAATCCGGGAGAAATACGAAATGGTCAGATTGATGTA	NA	NA	NA	NA	NA	NA	NA	NA	NA	NA	NA	---	NA	NA	hsa_circ_0016293	chr1	207498966	207534311	+	35345	2142	NM_001114752	CD55
hsa_circ_0052130	0.00433551	5.28899	5.88884	6.60737	6.69423	P	P	P	3.80431	4.06048	4.21427	P	P	P	hsa_circ_0052130	circRNA	TTCTTCATACTATCGGGTCGGGAGAAAGGTCGCTGTGTGGCCTCAGAATATTTTCTTGAA	NA	NA	NA	NA	NA	NA	NA	NA	NA	NA	NA	---	NA	NA	hsa_circ_0052130	chr19	54417753	54418759	+	1006	228	NM_031896	CACNG7
hsa_circ_0047142	2.61166e-06	5.2869	5.30687	5.35704	5.43217	P	P	P	2.97824	2.88034	3.02907	P	P	P	hsa_circ_0047142	circRNA	AACAGCAAATAAAACTGTTGAATGCTCTGTCTGAAACGAGAGATGCGGAAGCTTGCGCAG	NA	NA	NA	NA	NA	NA	NA	NA	NA	NA	NA	---	NA	NA	hsa_circ_0047142	chr18	20833692	20840434	+	6742	3452	NM_001100619	CABLES1
hsa_circ_0042538	0.000951436	5.28189	8.26425	8.33064	8.44381	P	P	P	6.0744	5.67149	6.06032	P	P	P	hsa_circ_0042538	circRNA	AAGGTCCCTTAGCCCCGAGTTTAACTGGTACCAGACAGCCCCAGTTCATTAGCCGGGACT	NA	NA	NA	NA	NA	NA	NA	NA	NA	NA	NA	upf2	NA	NA	hsa_circ_0042538	chr17	26694298	26695080	-	782	549	NM_000638	VTN
hsa_circ_0044704	0.00203336	5.28183	8.97299	8.98059	8.89444	P	P	P	6.72645	6.59755	6.28803	P	P	P	hsa_circ_0044704	circRNA	ATGGTTATCTATTTCTTCATTGCTGCTTCTTATGCTCCATGTTCCTCATTGTTCCGGCCA	NA	NA	NA	NA	NA	NA	NA	NA	NA	NA	NA	---	NA	NA	hsa_circ_0044704	chr17	53485106	53488778	-	3672	236	NM_012329	MMD
hsa_circ_0030581	0.00110024	5.27643	8.96257	8.67949	8.78174	P	P	P	6.41444	6.42536	6.39955	P	P	P	hsa_circ_0030581	circRNA	TTTCATCCAGGTTTAACTGTAGCTACCGTTCTTTTTGGCATAGCAAGATCTCTATTGGTA	NA	NA	NA	NA	NA	NA	NA	NA	NA	NA	NA	---	NA	NA	hsa_circ_0030581	chr13	95768175	95813589	-	45414	227	NM_005845	ABCC4
hsa_circ_0046333	0.0327674	5.274	7.27251	8.50047	8.64721	P	P	P	5.9664	5.791	5.81018	P	P	P	hsa_circ_0046333	circRNA	TAAACCGCATGTGATCTCCAACAAGCCTGAGGAGCCGACGGCACATGCCTTTGTGAGCAC	NA	NA	NA	NA	NA	NA	NA	NA	NA	NA	NA	---	NA	NA	hsa_circ_0046333	chr17	80036213	80042592	-	6379	3777	NM_004104	FASN
hsa_circ_0044701	0.000545708	5.2665	10.3381	9.86386	9.94756	P	P	P	7.52086	7.65697	7.81198	P	P	P	hsa_circ_0044701	circRNA	CACAATGGGATTCTCTCCAGCCTTGGTGGTGACATCAATGATATAAGGTGGTTGAACTCT	NA	NA	NA	NA	NA	NA	NA	NA	NA	NA	NA	---	NA	NA	hsa_circ_0044701	chr17	53478829	53478899	-	70	70	NM_012329	MMD
hsa_circ_0061097	0.0494359	5.26384	4.55331	3.90736	4.28823	P	P	P	0.311201	2.09748	2.46008	A	A	P	hsa_circ_0061097	circRNA	CCTTCCTGAGGGCCAGTACTGTGACATCTGCACGGCTGCCAACAGCAACAAGGCACACCC	NA	NA	NA	NA	NA	NA	NA	NA	NA	NA	NA	---	NA	NA	hsa_circ_0061097	chr20	60911789	60937608	-	25819	1920	NM_005560	LAMA5
hsa_circ_0086679	0.00441857	5.26175	3.05034	3.03786	3.37422	P	P	P	1.02856	0.222842	0.925145	A	A	A	hsa_circ_0086679	circRNA	AAAGGCTTGAAAGAAGTGAAAATAAACAGCCGCAGGACTGTTCTACATTTGGCCTGTGCC	NA	NA	NA	NA	NA	NA	NA	NA	NA	NA	NA	---	NA	NA	hsa_circ_0086679	chr9	33528724	33543253	+	14529	754	NM_001244752	ANKRD18B
hsa_circ_0030567	3.19796e-05	5.25984	7.89881	7.77887	7.98121	P	P	P	5.35604	5.48319	5.62881	P	P	P	hsa_circ_0030567	circRNA	AGCAAAACAGGAACCTGTTTTGTTCACTGGAACAATGAGGAAAAACCTGGATCCCTTTAA	NA	NA	NA	NA	NA	NA	NA	NA	NA	NA	NA	---	NA	NA	hsa_circ_0030567	chr13	95686858	95705438	-	18580	504	NM_005845	ABCC4
hsa_circ_0019308	0.0024069	5.24931	3.10939	2.29476	3.00114	P	P	P	0.3356	0.166178	0.782425	A	A	A	hsa_circ_0019308	circRNA	AGCATCAGGAAAGGAAACGGTGGACATGCTCAAGAGTCACATTAAAGAGGAACTGATGCA	NA	NA	NA	NA	NA	NA	NA	NA	NA	NA	NA	Cpq	NA	NA	hsa_circ_0019308	chr10	98383228	98405419	-	22191	550	NM_152309	PIK3AP1
hsa_circ_0022113	0.0236182	5.2325	3.63716	5.14274	5.04507	P	P	P	2.69847	1.77958	2.46331	P	A	P	hsa_circ_0022113	circRNA	TGATTTAATAAAGGGAACTGACTTTGGAAACCAGGAAGAAGTGGAGAAGCGCTTTGAGGG	NA	NA	NA	NA	NA	NA	NA	NA	NA	NA	NA	ORYCUNV1R1512	NA	NA	hsa_circ_0022113	chr11	57093458	57099754	-	6296	1680	NM_003146	SSRP1
hsa_circ_0069329	0.000827353	5.22264	3.86214	3.43728	3.84859	P	P	P	1.45759	1.55983	0.94275	A	A	A	hsa_circ_0069329	circRNA	TGGAACTGCAGAAGATAGATGAAGAGAATGAGGCAAACTTGCTAGCAGTCCTCACAGAGA	NA	NA	NA	NA	NA	NA	NA	NA	NA	NA	NA	DYM	NA	NA	hsa_circ_0069329	chr4	23825902	23833374	-	7472	643	NM_013261	PPARGC1A
hsa_circ_0069359	2.02642e-05	5.2047	7.89	7.7116	7.96151	P	P	P	5.47486	5.5917	5.35908	P	P	P	hsa_circ_0069359	circRNA	TCTGTCTCAGGACCTGGCCAGGAGATACTTGGGTGTTAACTGTGTTTGGAGATACTATAA	NA	NA	NA	NA	NA	NA	NA	NA	NA	NA	NA	LRP8	NA	NA	hsa_circ_0069359	chr4	25759155	25769231	-	10076	499	NM_015187	SEL1L3
hsa_circ_0069360	4.00265e-05	5.18126	7.83778	8.05181	8.08105	P	P	P	5.62881	5.70381	5.52453	P	P	P	hsa_circ_0069360	circRNA	GTGCAGTATTTCCAGTCTGTCTCAGGCATATGTTGAAACAATTAGACTAAAAGATGATGA	NA	NA	NA	NA	NA	NA	NA	NA	NA	NA	NA	LRP8	NA	NA	hsa_circ_0069360	chr4	25759155	25792196	-	33041	1303	NM_015187	SEL1L3
hsa_circ_0092221	0.0139667	5.16896	9.16672	10.2022	10.0446	P	P	P	7.57873	7.58749	7.32108	P	P	P	hsa_circ_0092221	circRNA	CTTTGCACAAATAAACAGTGAATTCTCGTTTCTTAAGCACCTCGTCCATCGACAGGTCCC	NA	NA	NA	NA	NA	NA	NA	NA	NA	NA	NA	LEP	NA	NA	hsa_circ_0092221	chrY	2712117	2734997	+	22880	773	NM_001008	RPS4Y1
hsa_circ_0030580	0.000119738	5.16415	8.39926	8.18297	8.20823	P	P	P	5.95133	5.84397	5.8974	P	P	P	hsa_circ_0030580	circRNA	ATCAATCTTTACAGAGAATGTCCCAGTTACACTATCAGAGGAGAACCGTTCTGAAGGAAA	NA	NA	NA	NA	NA	NA	NA	NA	NA	NA	NA	---	NA	NA	hsa_circ_0030580	chr13	95748024	95816772	-	68748	910	NM_001105515	ABCC4
hsa_circ_0030596	0.000217598	5.16179	8.39498	8.20745	8.19233	P	P	P	5.94119	5.86223	5.89559	P	P	P	hsa_circ_0030596	circRNA	TCAGTGCAGTAGATGCGGAAGTTAGCAGACACTTGTTCGAACTTCATCACTGTTAAGTGC	NA	NA	NA	NA	NA	NA	NA	NA	NA	NA	NA	---	NA	NA	hsa_circ_0030596	chr13	95829960	95839146	-	9186	374	NM_005845	ABCC4
hsa_circ_0057241	0.0209608	5.16048	4.3282	5.63278	5.42609	P	P	P	3.00008	2.5733	2.97945	P	P	P	hsa_circ_0057241	circRNA	GGCAAGGAAGTTCCAGGTTACATTGGCATATATATTCAGCATTGATGAAAAAGAACTAAA	NA	NA	NA	NA	NA	NA	NA	NA	NA	NA	NA	---	NA	NA	hsa_circ_0057241	chr2	182347086	182360664	+	13578	700	NM_000885	ITGA4
hsa_circ_0025770	4.48745e-06	5.14908	7.56437	7.40971	7.4677	P	P	P	5.08455	5.08281	5.1834	P	P	P	hsa_circ_0025770	circRNA	CGTACAACAGGCTAAACATATTTTTGACTGGTATGAACCCATTCTACTTTCATGCAGTAA	NA	NA	NA	NA	NA	NA	NA	NA	NA	NA	NA	rsrc1	NA	NA	hsa_circ_0025770	chr12	29911636	29921008	-	9372	252	NM_175861	TMTC1
hsa_circ_0056639	0.00897752	5.13901	3.35301	3.00504	3.08125	P	P	P	0.141463	0.935907	1.12516	A	A	A	hsa_circ_0056639	circRNA	ATTTCAAGAGAATTCCCAACTTGTGAGCCACTAACCCAATTCGTATGCAAAAGTGGAAGA	NA	NA	NA	NA	NA	NA	NA	NA	NA	NA	NA	---	NA	NA	hsa_circ_0056639	chr2	141607670	141709509	-	101839	2052	NM_018557	LRP1B
hsa_circ_0012666	0.0151843	5.13228	6.37083	7.32585	7.14792	P	P	P	4.69759	4.61311	4.62039	P	P	P	hsa_circ_0012666	circRNA	TGTTTAAATAAAAGTGGCCTGGAAGCTGGCTCCGAAAACTCAGACCTGTTCTATGCCGTA	NA	NA	NA	NA	NA	NA	NA	NA	NA	NA	NA	---	NA	NA	hsa_circ_0012666	chr1	55315299	55337286	-	21987	3545	NM_014762	DHCR24
hsa_circ_0007122	0.000860348	5.12922	4.93316	5.16373	5.45699	P	P	P	2.68913	2.94935	2.87488	P	P	P	hsa_circ_0007122	circRNA	TCCAGGAAAACCTGGAGTTGGAGATGTGTTCTTTTAGATCAGCCTGAGATATGGGGTTCA	NA	NA	NA	NA	NA	NA	NA	NA	NA	NA	NA	Mdp1	NA	NA	hsa_circ_0007122	chr1	67142686	67154958	+	12272	797	NM_032291	SGIP1
hsa_circ_0020792	4.25999e-05	5.12858	7.54089	7.25454	7.45125	P	P	P	5.21464	5.04399	4.91094	P	P	P	hsa_circ_0020792	circRNA	TAAAAGTCATGATCTTCGACAACTTCCCCAGATACCCCGTGGGCAAGTTCTTCCAATATG	NA	NA	NA	NA	NA	NA	NA	NA	NA	NA	NA	---	NA	NA	hsa_circ_0020792	chr11	2150341	2154453	-	4112	4112	NR_003512	INS-IGF2
hsa_circ_0030002	1.89016e-05	5.125	7.97611	7.82944	8.01974	P	P	P	5.51425	5.60528	5.63712	P	P	P	hsa_circ_0030002	circRNA	TGACCAAGATGTGTACTATCCGGATGAGTTTTGTTAAGGTGTGCACTTGTACTACGTCGG	NA	NA	NA	NA	NA	NA	NA	NA	NA	NA	NA	Mrvi1	NA	NA	hsa_circ_0030002	chr13	37427555	37427812	-	257	257	NM_001127217	SMAD9
hsa_circ_0075895	0.0337995	5.12008	2.99863	4.40621	4.24154	P	P	P	1.79116	1.61454	1.52286	A	A	A	hsa_circ_0075895	circRNA	TTTACTGGGGAGAATAAAAAGGACCATACGGTAAACCGGTTCGTGAGACGCAAGAAGAAG	NA	NA	NA	NA	NA	NA	NA	NA	NA	NA	NA	---	NA	NA	hsa_circ_0075895	chr6	26598141	26600277	+	2136	1982	NM_013375	ABT1
hsa_circ_0025765	0.000316342	5.10242	6.73238	6.54541	6.75673	P	P	P	4.09489	4.49818	4.36817	P	P	P	hsa_circ_0025765	circRNA	TTCTTACGAGGTATCTGAGAGCAAGCAGCAATAGAAATTTCCTGCTTACCATGAGACCAT	NA	NA	NA	NA	NA	NA	NA	NA	NA	NA	NA	RSPH3	NA	NA	hsa_circ_0025765	chr12	29812812	29813818	-	1006	1006	NM_175861	TMTC1
hsa_circ_0054198	0.0310161	5.1005	2.85627	4.59377	4.34004	P	P	P	2.46845	1.27548	1.1173	A	A	A	hsa_circ_0054198	circRNA	CTTTCAAGAAAAGAAAAGAAAGATGTACCAAGGACACGTCGCACATTTAGAAGATGATGA	NA	NA	NA	NA	NA	NA	NA	NA	NA	NA	NA	---	NA	NA	hsa_circ_0054198	chr2	39513992	39519967	-	5975	370	NM_003618	MAP4K3
hsa_circ_0021337	0.00526449	5.09586	3.36397	3.50433	3.73004	P	P	P	1.44799	1.36274	0.633401	A	A	A	hsa_circ_0021337	circRNA	GGAAAATCAGATGATTCTTTGGGATTGGGACTTAAAACAATGGTATAAGCCTCATTATCA	NA	NA	NA	NA	NA	NA	NA	NA	NA	NA	NA	CD247	NA	NA	hsa_circ_0021337	chr11	14793482	14840755	+	47273	829	NM_000922	PDE3B
hsa_circ_0067557	0.00180764	5.0849	9.50192	9.22828	9.11667	P	P	P	6.93765	6.98436	6.91294	P	P	P	hsa_circ_0067557	circRNA	TGTTCAAAACGTCGAGATGAGAGTGGAAGGTGTGGTCTGCAAGCAAGTATTCAAGAAGGT	NA	NA	NA	NA	NA	NA	NA	NA	NA	NA	NA	HSD17B3	NA	NA	hsa_circ_0067557	chr3	139236275	139236522	-	247	247	NM_002899	RBP1
hsa_circ_0087326	0.00125473	5.07928	5.98357	6.11217	6.0088	P	P	P	3.55926	3.92761	3.55444	P	P	P	hsa_circ_0087326	circRNA	GTCTAATGAGACTGAAATCGCCAAGAGATTGAATACGATTTGTGCACAAGTCATCCCATT	NA	NA	NA	NA	NA	NA	NA	NA	NA	NA	NA	Ret	NA	NA	hsa_circ_0087326	chr9	84231560	84268951	-	37391	531	NM_005077	TLE1
hsa_circ_0060110	0.0111086	5.07423	3.97852	5.22775	5.05008	P	P	P	2.95546	2.50996	1.83499	P	P	A	hsa_circ_0060110	circRNA	CCCCATTAAACATGCTGATTTTTGGAGTAGGAACCTAAGGAGATGCTGACTCTAAGTGAG	NA	NA	NA	NA	NA	NA	NA	NA	NA	NA	NA	nol10	NA	NA	hsa_circ_0060110	chr20	34206371	34208965	+	2594	753	NM_003116	SPAG4
hsa_circ_0092220	0.0180272	5.07277	9.355	10.3456	10.307	P	P	P	7.81666	7.67802	7.68007	P	P	P	hsa_circ_0092220	circRNA	TTCTTTGCACAAATAAACAGTGAATTCTCGTTTCTTAAGCCCGGGGCCCCAAGAAGCACT	NA	NA	NA	NA	NA	NA	NA	NA	NA	NA	NA	Leo1	NA	NA	hsa_circ_0092220	chrY	2710205	2734997	+	24792	851	NM_001008	RPS4Y1
hsa_circ_0054187	0.00925995	5.05069	4.23747	5.41891	5.18293	P	P	P	2.11268	2.46358	3.2565	A	A	P	hsa_circ_0054187	circRNA	CTCACCTTTGATTTCCAGATTGAATCAATAGGAAATTTTCTGTATCAGCAAAAATCCCTG	NA	NA	NA	NA	NA	NA	NA	NA	NA	NA	NA	---	NA	NA	hsa_circ_0054187	chr2	39485488	39494388	-	8900	497	NM_003618	MAP4K3
hsa_circ_0084962	0.0382197	5.04042	2.7113	4.42504	4.26073	P	P	P	1.60991	1.13034	2.04366	A	A	A	hsa_circ_0084962	circRNA	GGTTGCTACACTTTATACTGTGCTGTTAAAAGACATAATCTGACTAAAAGATGGCTTATG	NA	NA	NA	NA	NA	NA	NA	NA	NA	NA	NA	---	NA	NA	hsa_circ_0084962	chr8	96053797	96070944	+	17147	1361	NM_152416	C8orf38
hsa_circ_0073386	0.0282555	5.01495	3.36488	3.99066	3.83944	P	P	P	0.411158	1.15806	2.17545	A	A	A	hsa_circ_0073386	circRNA	TGCTTTTGTGACAATGCTAATGAGGAAGAGTTGGAAAAGATCAAGTAAGTTTCAGACCCA	NA	NA	NA	NA	NA	NA	NA	NA	NA	NA	NA	---	NA	NA	hsa_circ_0073386	chr5	94204037	94267696	-	63659	1263	NM_024717	MCTP1
hsa_circ_0067558	9.05215e-06	5.00536	7.89308	7.71786	7.71373	P	P	P	5.41484	5.38188	5.5587	P	P	P	hsa_circ_0067558	circRNA	TGACCCCCCAACGTCAATGTGGCCTTGCGCAAAATCGCCAACTTGCTGAAGCCAGACAAA	NA	NA	NA	NA	NA	NA	NA	NA	NA	NA	NA	HSD17B3	NA	NA	hsa_circ_0067558	chr3	139245246	139257801	-	12555	1117	NM_001130992	RBP1
hsa_circ_0002015	0.00137163	4.99854	9.72898	9.42721	9.38234	P	P	P	7.22486	7.22551	7.14743	P	P	P	hsa_circ_0002015	circRNA	GACATCAATGGTTAAATCTTCGTGAACTTGGACCCCTGGCATCTCATATGCGTTGGTTTA	NA	NA	NA	NA	NA	NA	NA	NA	NA	NA	NA	---	NA	NA	hsa_circ_0002015	chr17	53478829	53481229	-	2400	172	NM_012329	MMD
hsa_circ_0091328	0.00043589	4.99741	6.81914	6.84209	6.62414	P	P	P	4.35568	4.26158	4.68021	P	P	P	hsa_circ_0091328	circRNA	CCAGAAAACTGCGTACTTTATTGTCGGCTTCCAAAGATTACTAACTTTTATCTGTATCAC	NA	NA	NA	NA	NA	NA	NA	NA	NA	NA	NA	---	NA	NA	hsa_circ_0091328	chrX	108924226	108926895	-	2669	958	NM_022977	ACSL4
hsa_circ_0030579	8.98462e-05	4.99679	8.43711	8.24716	8.27518	P	P	P	6.02529	6.13656	5.82487	P	P	P	hsa_circ_0030579	circRNA	ATCAATCTTTGTTGCCTATGTGCTTCAAGATTGGTGGCTTTCATACTGGGCAAACAAACA	NA	NA	NA	NA	NA	NA	NA	NA	NA	NA	NA	---	NA	NA	hsa_circ_0030579	chr13	95748024	95815901	-	67877	769	NM_001105515	ABCC4
hsa_circ_0045776	0.0361592	4.99363	3.63742	3.72391	4.11362	P	P	P	1.335	0.382775	2.25643	A	A	A	hsa_circ_0045776	circRNA	TGCTTACCTGGCCAGAGGACGTGCGCATTTCTAGGTATGGAGTGTGACAATAACAATGAC	NA	NA	NA	NA	NA	NA	NA	NA	NA	NA	NA	Kcnc3	NA	NA	hsa_circ_0045776	chr17	74148435	74148546	-	111	111	NM_052916	RNF157
hsa_circ_0008463	0.00101099	4.99237	8.80407	8.68802	8.79554	P	P	P	6.25493	6.64559	6.40363	P	P	P	hsa_circ_0008463	circRNA	AGCAAAACAGGTTGGCATTGTGGGAAGAACCGGAGCTGGAAAAAGTTCCCTCATCTCAGC	NA	NA	NA	NA	NA	NA	NA	NA	NA	NA	NA	---	NA	NA	hsa_circ_0008463	chr13	95686858	95715113	-	28255	660	NM_005845	ABCC4
hsa_circ_0069765	0.011877	4.98838	5.36946	5.414	5.25966	P	P	P	2.48465	2.99722	3.45056	A	P	P	hsa_circ_0069765	circRNA	CAAATATTTACAGACTAAACTACAGGAGAAATATAATAGCTGGCATCACGGTGACTTCAA	NA	NA	NA	NA	NA	NA	NA	NA	NA	NA	NA	---	NA	NA	hsa_circ_0069765	chr4	55569889	55593490	+	23601	891	NM_000222	KIT
hsa_circ_0021352	4.65202e-05	4.98425	2.84941	3.07154	2.78805	P	P	P	0.570461	0.744102	0.441961	A	A	A	hsa_circ_0021352	circRNA	GCAAAGAATGGTCACTTTCATGAATTCAAAGGCAATTTACCAGTGATTTCTGGGTGCTGG	NA	NA	NA	NA	NA	NA	NA	NA	NA	NA	NA	NLRC5	NA	NA	hsa_circ_0021352	chr11	16362557	16497935	-	135378	315	NM_033326	SOX6
hsa_circ_0025421	0.0168579	4.96483	3.74351	3.58942	3.31279	P	P	P	1.74325	0.434388	1.27768	A	A	A	hsa_circ_0025421	circRNA	CACAGTCACTCTAAACAGCCATGGCTGCTTCTATCAGCAAGTAAAAACCAAGGTCTTCCA	NA	NA	NA	NA	NA	NA	NA	NA	NA	NA	NA	---	NA	NA	hsa_circ_0025421	chr12	9229941	9259201	-	29260	2472	NM_000014	A2M
hsa_circ_0049238	0.00478036	4.96448	9.53708	9.52937	9.56799	P	P	P	6.90824	7.4721	7.26421	P	P	P	hsa_circ_0049238	circRNA	ACATTGCCCAGACTTCCTTTGTGTTAGTTAATAAAGCTTTCTCAACTGCCTCTCGGAGGC	NA	NA	NA	NA	NA	NA	NA	NA	NA	NA	NA	---	NA	NA	hsa_circ_0049238	chr19	10394804	10397291	+	2487	2194	NM_000201	ICAM1
hsa_circ_0016128	0.0234988	4.96122	3.72055	3.55728	3.40802	P	P	P	0.467983	1.05549	1.8906	A	A	A	hsa_circ_0016128	circRNA	ACATTGGCAACCATTTCAATGAGTTTGCAGGTCACGTGCGGTTCATTGACTATGAATATG	NA	NA	NA	NA	NA	NA	NA	NA	NA	NA	NA	---	NA	NA	hsa_circ_0016128	chr1	204109162	204109246	-	84	84	NM_018208	ETNK2
hsa_circ_0007612	0.0327242	4.96029	3.75678	5.2596	5.45959	P	P	P	3.0731	2.84393	1.89694	P	P	A	hsa_circ_0007612	circRNA	CTAGACTTCATCAGAGCTATTGCAAGCATCATGGAAAAATCAAGAAAACCAACTTTCTAA	NA	NA	NA	NA	NA	NA	NA	NA	NA	NA	NA	Baz1a	NA	NA	hsa_circ_0007612	chr7	103777227	103805730	-	28503	272	NM_002553	ORC5
hsa_circ_0027684	0.0138991	4.95905	3.7387	3.39961	3.6326	P	P	P	1.38695	1.69274	0.558864	A	A	A	hsa_circ_0027684	circRNA	ATGCATTATGGTGAAGCATATATGCGTTTAAGCAAACTCCCCGAAGCAGAGCATTGGTAT	NA	NA	NA	NA	NA	NA	NA	NA	NA	NA	NA	RSRP1	NA	NA	hsa_circ_0027684	chr12	83379703	83424658	+	44955	204	NM_152588	TMTC2
hsa_circ_0054997	0.00252902	4.95864	6.02783	6.08286	6.16686	P	P	P	3.53358	3.71965	4.04987	P	P	P	hsa_circ_0054997	circRNA	CTGTTCCAGCATCTAACAATGATTCAAGCCATACAAGTATTAAGGTTTCATCTATTGGAA	NA	NA	NA	NA	NA	NA	NA	NA	NA	NA	NA	---	NA	NA	hsa_circ_0054997	chr2	66668545	66739426	+	70881	456	NM_002398	MEIS1
hsa_circ_0079592	0.00115039	4.95633	5.24282	4.69992	4.79576	P	P	P	2.72976	2.44458	2.6805	A	A	P	hsa_circ_0079592	circRNA	TTCAATTAAGGATTCGGAAACTTCAGATACGAAATATCCCGCCTCATTTACAGTGGGAGG	NA	NA	NA	NA	NA	NA	NA	NA	NA	NA	NA	---	NA	NA	hsa_circ_0079592	chr7	23358756	23458443	-	99687	1084	NM_006547	IGF2BP3
hsa_circ_0006318	0.000102114	4.95446	7.29677	6.95685	7.03099	P	P	P	4.99028	4.62683	4.73953	P	P	P	hsa_circ_0006318	circRNA	AAGAATCCAGGCACTTCGTCTTAGTAACATGGCCATGGGGAAGACAACCACAGGCCAGAT	NA	NA	NA	NA	NA	NA	NA	NA	NA	NA	NA	---	NA	NA	hsa_circ_0006318	chr13	95858785	95863035	-	4250	630	NM_005845	ABCC4
hsa_circ_0047141	0.000519156	4.94106	8.03814	7.72952	7.72704	P	P	P	5.61341	5.51777	5.46795	P	P	P	hsa_circ_0047141	circRNA	TGAATGCTCTGGTAGTGACCTGGGAGACTTTATGGACTATGACCCAAATCTCTTGGATGA	NA	NA	NA	NA	NA	NA	NA	NA	NA	NA	NA	---	NA	NA	hsa_circ_0047141	chr18	20817105	20840434	+	23329	3663	NM_001100619	CABLES1
hsa_circ_0058197	6.72762e-05	4.92787	9.66623	9.4838	9.80452	P	P	P	7.4884	7.31442	7.25644	P	P	P	hsa_circ_0058197	circRNA	TTATTTAATAAAGTTATGCATTCAGTTAGGCCCCTGCCGCAGACACATGGAGGCTTCCCT	NA	NA	NA	NA	NA	NA	NA	NA	NA	NA	NA	---	NA	NA	hsa_circ_0058197	chr2	217536827	217542954	-	6127	4898	NM_000599	IGFBP5
hsa_circ_0030576	0.000168337	4.92358	8.27955	8.21692	8.03814	P	P	P	5.76542	5.76175	6.09333	P	P	P	hsa_circ_0030576	circRNA	AATGCCTTACAAGAGACCTTTTTGCTACTTGATGAGATATCACAGCGCAACCGTCAGCTG	NA	NA	NA	NA	NA	NA	NA	NA	NA	NA	NA	---	NA	NA	hsa_circ_0030576	chr13	95705348	95847191	-	141843	2295	NM_005845	ABCC4
hsa_circ_0048936	0.000344375	4.91735	5.12852	5.14109	4.92896	P	P	P	2.99506	2.69673	2.59191	P	P	P	hsa_circ_0048936	circRNA	AAATGATTTGTCGCCTGTCTGACTGATTTACCCTAGGACTGCTGGCTGAATACAGAGACA	NA	NA	NA	NA	NA	NA	NA	NA	NA	NA	NA	---	NA	NA	hsa_circ_0048936	chr19	6928155	6940464	+	12309	863	NM_001974	EMR1
hsa_circ_0054642	0.0055829	4.91278	3.6746	4.63422	4.3906	P	P	P	1.94462	2.45255	1.37873	A	A	A	hsa_circ_0054642	circRNA	TAACTTAAAAAAACTTCAGGCTGAAACAGAAACTGTTCAGGTTCCATTATCAAAACGAGC	NA	NA	NA	NA	NA	NA	NA	NA	NA	NA	NA	DKFZP459I087	NA	NA	hsa_circ_0054642	chr2	55871771	55871855	-	84	84	NM_033109	PNPT1
hsa_circ_0012900	8.13679e-06	4.908	7.65281	7.58921	7.5362	P	P	P	5.34861	5.19982	5.34191	P	P	P	hsa_circ_0012900	circRNA	CCCACAGTTGGTGAAGAAGTGGCAAGACCCAGGCGTTCCACACCAACTCCAGAACTTATA	NA	NA	NA	NA	NA	NA	NA	NA	NA	NA	NA	Me3	NA	NA	hsa_circ_0012900	chr1	67137626	67155999	+	18373	1062	NM_032291	SGIP1
hsa_circ_0049235	0.00254048	4.90627	6.60044	7.21076	7.40539	P	P	P	5.04128	4.86009	4.49524	P	P	P	hsa_circ_0049235	circRNA	TTTGTGTTAGTTAATAAAGCTTTCTCAACTGCCGACCTGGCAATGCCCAGACATCTGTGT	NA	NA	NA	NA	NA	NA	NA	NA	NA	NA	NA	---	NA	NA	hsa_circ_0049235	chr19	10385440	10397291	+	11851	2860	NM_000201	ICAM1
hsa_circ_0073807	0.00137232	4.89751	5.25564	5.53988	5.8393	P	P	P	2.91367	3.64546	3.16048	P	P	P	hsa_circ_0073807	circRNA	AAGGATATATTGGAACTTATTGTGGACAACTTCAGCAGTGCAGTGTGAGATGCATGAATG	NA	NA	NA	NA	NA	NA	NA	NA	NA	NA	NA	---	NA	NA	hsa_circ_0073807	chr5	127863564	127863660	-	96	96	NM_001999	FBN2
hsa_circ_0025412	0.000381506	4.89683	8.84034	8.75564	8.84947	P	P	P	6.66784	6.50478	6.3851	P	P	P	hsa_circ_0025412	circRNA	AGAGATCTGAAACCAGCCATAGTGAAAGTCTATGATTACTACGAGACGGGACACAGTGGT	NA	NA	NA	NA	NA	NA	NA	NA	NA	NA	NA	---	NA	NA	hsa_circ_0025412	chr12	9221335	9225467	-	4132	610	NM_000014	A2M
hsa_circ_0030607	0.00466564	4.8939	7.76296	7.72419	7.69994	P	P	P	5.24205	5.26495	5.74906	P	P	P	hsa_circ_0030607	circRNA	TTATCGGAAGGTTCTGGGATAAAGAAGTTTTAAGAGCTGAGAATGACGCACAGAAGCCTT	NA	NA	NA	NA	NA	NA	NA	NA	NA	NA	NA	---	NA	NA	hsa_circ_0030607	chr13	95886863	95899349	-	12486	346	NM_005845	ABCC4
hsa_circ_0073798	1.71136e-05	4.88448	6.66052	6.79848	6.81471	P	P	P	4.54525	4.51973	4.34055	P	P	P	hsa_circ_0073798	circRNA	CAAAAAATTCAGAGGAATATCGCAGACTTTGCATGGATGGACTTCCAATGGGAGGAATTC	NA	NA	NA	NA	NA	NA	NA	NA	NA	NA	NA	---	NA	NA	hsa_circ_0073798	chr5	127704874	127729061	-	24187	1017	NM_001999	FBN2
hsa_circ_0046334	0.0450563	4.8844	7.44732	8.94628	8.83307	P	P	P	6.33324	6.14851	6.29507	P	P	P	hsa_circ_0046334	circRNA	ATTAAACCGCATGTGATCTCCATGGCTGACGTGGTGGTGAGCAGGTGGCTGAGGGTCACA	NA	NA	NA	NA	NA	NA	NA	NA	NA	NA	NA	---	NA	NA	hsa_circ_0046334	chr17	80036213	80045129	-	8916	5118	NM_004104	FASN
hsa_circ_0028303	0.00411978	4.88397	5.96856	5.86365	5.90033	P	P	P	3.44866	3.42491	3.93689	P	P	P	hsa_circ_0028303	circRNA	AATGTCTCCGATTTTCATAAACAATGAATGGCACGATGCCGTCAGCAGGAAAACATTCCC	NA	NA	NA	NA	NA	NA	NA	NA	NA	NA	NA	---	NA	NA	hsa_circ_0028303	chr12	112219721	112223150	+	3429	326	NM_000690	ALDH2
hsa_circ_0070797	0.0298474	4.88382	4.87401	6.13206	6.17977	P	P	P	3.7418	3.36345	3.52837	P	P	P	hsa_circ_0070797	circRNA	GTGTGAATAACTCTTACATACAGCGGTTCTTTGCAGATGGATTTTAAGTGTTAAGAAGAA	NA	NA	NA	NA	NA	NA	NA	NA	NA	NA	NA	CD86	NA	NA	hsa_circ_0070797	chr4	120440199	120442215	-	2016	221	NM_001083	PDE5A
hsa_circ_0073791	0.00215771	4.88234	7.12727	6.881	7.06563	P	P	P	4.36787	4.94513	4.846	P	P	P	hsa_circ_0073791	circRNA	AACTGTACAGACATCAATGAATGCAAAGCATTTCCTGGGATGTGCACTTATGGGAAGTGC	NA	NA	NA	NA	NA	NA	NA	NA	NA	NA	NA	---	NA	NA	hsa_circ_0073791	chr5	127654570	127680202	-	25632	1377	NM_001999	FBN2
hsa_circ_0030597	0.000662031	4.8663	7.82692	7.58226	7.49336	P	P	P	5.32517	5.31848	5.42874	P	P	P	hsa_circ_0030597	circRNA	ACACTTGTTCGAACTACCTTTTTGCTACTTGATGAGATATCACAGCGCAACCGTCAGCTG	NA	NA	NA	NA	NA	NA	NA	NA	NA	NA	NA	---	NA	NA	hsa_circ_0030597	chr13	95829960	95847191	-	17231	566	NM_005845	ABCC4
hsa_circ_0012911	0.00104977	4.86527	6.64504	7.31492	7.049	P	P	P	5.00807	4.66907	4.51697	P	P	P	hsa_circ_0012911	circRNA	TTTCACGTGGACAAACTTCATTGGTTTAAATATCAGATGGTGGCCACAGTGGCAGTTCTC	NA	NA	NA	NA	NA	NA	NA	NA	NA	NA	NA	Mir466j	NA	NA	hsa_circ_0012911	chr1	67474767	67518540	-	43773	722	NM_015139	SLC35D1
hsa_circ_0059707	4.30464e-05	4.862	10.2938	10.0076	10.1051	P	P	P	7.90565	7.96632	7.69031	P	P	P	hsa_circ_0059707	circRNA	TAAACAAATAATTTAGATGGTGGTAAGCGGCATGCGTTCCTGCGGACGATCGCATCTTGT	NA	NA	NA	NA	NA	NA	NA	NA	NA	NA	NA	---	NA	NA	hsa_circ_0059707	chr20	30193855	30194317	+	462	462	NM_002165	ID1
hsa_circ_0024002	0.0467872	4.8614	4.09515	3.59123	3.2943	P	P	P	0.42176	2.40627	0.456487	A	A	A	hsa_circ_0024002	circRNA	GGAACTGAGAGATGGAAGTATGATGTGATGGATATAATTATGGGACACTGTGTGGGCACA	NA	NA	NA	NA	NA	NA	NA	NA	NA	NA	NA	---	NA	NA	hsa_circ_0024002	chr11	92085261	92616559	+	531298	12954	NM_001008781	FAT3
hsa_circ_0030595	0.000127469	4.8599	7.6298	7.50229	7.31755	P	P	P	5.19366	5.11984	5.30433	P	P	P	hsa_circ_0030595	circRNA	ACTTGTTCGAACTGATTTACAGCTGTTGGAGGATGGTGATCTGACTGTGATAGGAGATCG	NA	NA	NA	NA	NA	NA	NA	NA	NA	NA	NA	---	NA	NA	hsa_circ_0030595	chr13	95829960	95830345	-	385	182	NM_005845	ABCC4
hsa_circ_0067374	0.044685	4.8538	3.42902	5.27145	4.73386	P	P	P	2.33703	1.96504	2.74457	A	A	P	hsa_circ_0067374	circRNA	GGGAATTGACTGCTTTGTTAATGAGAATTTTTGAAATACACACATACCAAACAGGCTTTC	NA	NA	NA	NA	NA	NA	NA	NA	NA	NA	NA	---	NA	NA	hsa_circ_0067374	chr3	132207819	132257876	+	50057	4060	NM_015268	DNAJC13
hsa_circ_0038336	0.0483187	4.84705	8.50931	10.2553	10.1664	M	M	M	7.94657	7.47954	7.12153	P	P	P	hsa_circ_0038336	circRNA	CTCTCCCAAGATCACTTTTCTCCAGAGAATGCAAATGACACGGCCAAGGAAACATGCCTA	NA	NA	NA	NA	NA	NA	NA	NA	NA	NA	NA	---	NA	NA	hsa_circ_0038336	chr16	19619499	19663412	+	43913	1437	NM_020314	C16orf62
hsa_circ_0089333	0.0169049	4.84247	5.08779	5.8895	6.13975	P	P	P	3.61272	3.46505	3.39908	P	P	P	hsa_circ_0089333	circRNA	GTTTATAATAAAGGGGGCGTGTGCTCAAGTACACTCATTTCATCCAGTCCTTCCTGGAGT	NA	NA	NA	NA	NA	NA	NA	NA	NA	NA	NA	---	NA	NA	hsa_circ_0089333	chr9	136028339	136029648	-	1309	1309	NM_021996	GBGT1
hsa_circ_0061087	0.0141589	4.84193	4.45244	4.31999	4.44963	P	P	P	2.60625	2.02573	1.58423	P	A	A	hsa_circ_0061087	circRNA	AGTGCCTCTGCAAACCTGGTTATGCAGGTGCCTCCTGCGAGCGGCACAGCACAGAGTCAG	NA	NA	NA	NA	NA	NA	NA	NA	NA	NA	NA	---	NA	NA	hsa_circ_0061087	chr20	60898831	60908762	-	9931	2971	NM_005560	LAMA5
hsa_circ_0025320	0.0316447	4.8344	6.66994	7.91418	7.90093	P	P	P	5.35467	5.41751	5.19927	P	P	P	hsa_circ_0025320	circRNA	CACTTCTGTTTGTTCAGTTTTTCACTACATCTTCAAACGACTCAAGTTCCTTGGAAATAA	NA	NA	NA	NA	NA	NA	NA	NA	NA	NA	NA	---	NA	NA	hsa_circ_0025320	chr12	7085346	7086907	-	1561	1143	NM_005768	LPCAT3
hsa_circ_0032975	4.36356e-05	4.82847	9.62122	9.33385	9.44063	P	P	P	7.13737	7.32763	7.12148	P	P	P	hsa_circ_0032975	circRNA	TCTTGCCAAGATGTGGACGAGTGTGCAACAGATTCCCACCAGTGCAACCCCACCCAGATC	NA	NA	NA	NA	NA	NA	NA	NA	NA	NA	NA	---	NA	NA	hsa_circ_0032975	chr14	92357564	92361416	-	3852	240	NM_006329	FBLN5
hsa_circ_0015503	0.000172204	4.81882	9.9941	9.6787	10.0729	P	P	P	7.51993	7.83424	7.59594	P	P	P	hsa_circ_0015503	circRNA	ATTATTTTTGTTAAGGCAAGGTGCCGTTCTTGCCAAGAAGGTGAACTGGATTGGCTGCCA	NA	NA	NA	NA	NA	NA	NA	NA	NA	NA	NA	Gm9839	NA	NA	hsa_circ_0015503	chr1	180159567	180167169	+	7602	2101	NM_002826	QSOX1
hsa_circ_0030573	0.00226844	4.81854	5.9184	5.98737	5.62789	P	P	P	3.5954	3.58775	3.56925	P	P	P	hsa_circ_0030573	circRNA	TATTGACAGCGACAAGATAATGGCACTTCGTCTTAGTAACATGGCCATGGGGAAGACAAC	NA	NA	NA	NA	NA	NA	NA	NA	NA	NA	NA	---	NA	NA	hsa_circ_0030573	chr13	95695935	95863035	-	167100	3204	NM_005845	ABCC4
hsa_circ_0069996	0.00184453	4.81342	7.10663	6.95967	7.06815	P	P	P	5.02978	4.71162	4.55462	P	P	P	hsa_circ_0069996	circRNA	ATAAAATTACAGGCCATTATGCTGCTGGATTGGACCTCAATGACACCTACTCTGGGAAGC	NA	NA	NA	NA	NA	NA	NA	NA	NA	NA	NA	---	NA	NA	hsa_circ_0069996	chr4	75318260	75482254	+	163994	162888	NM_001657	AREG
hsa_circ_0063792	0.000599278	4.8111	5.70893	6.15801	6.25687	P	P	P	3.74335	4.03115	3.56897	P	P	P	hsa_circ_0063792	circRNA	TAAAATGAATTCATCAGTTCCTCCAAGGCGAATATGAGGCCGCGCTGACCATCTACGATA	NA	NA	NA	NA	NA	NA	NA	NA	NA	NA	NA	Snora62	NA	NA	hsa_circ_0063792	chr22	46681137	46689905	+	8768	1739	NM_017931	TTC38
hsa_circ_0007282	0.000104017	4.8093	8.14254	7.86128	7.91905	P	P	P	5.78841	5.49504	5.83455	P	P	P	hsa_circ_0007282	circRNA	CGAAGAATCCAGGAAAGTGCCAAAGTAATCCAGCCCATATTTTTGGGAAAAATTATTAAT	NA	NA	NA	NA	NA	NA	NA	NA	NA	NA	NA	---	NA	NA	hsa_circ_0007282	chr13	95858785	95887088	-	28303	855	NM_005845	ABCC4
hsa_circ_0072569	0.0434766	4.80378	4.51382	2.81228	2.84036	P	P	P	1.26852	1.87088	0.715492	A	A	A	hsa_circ_0072569	circRNA	TGCATTAACTAATTTGCAAGATCGAGCACCTAGCAAGTCTTGGCCAGTCTGCGAACTGTA	NA	NA	NA	NA	NA	NA	NA	NA	NA	NA	NA	CD37	NA	NA	hsa_circ_0072569	chr5	58481014	58481088	-	74	74	NM_001197220	PDE4D
hsa_circ_0046936	0.00178759	4.7914	5.90156	5.89492	5.97692	P	P	P	3.47868	3.87775	3.60795	P	P	P	hsa_circ_0046936	circRNA	TGAGAGAAAAGTTGTTTGGTATCAAGTCAGTAATTCAAACGGACTGTTCAAGTACTTGGA	NA	NA	NA	NA	NA	NA	NA	NA	NA	NA	NA	COX20	NA	NA	hsa_circ_0046936	chr18	10803872	10807272	-	3400	283	NM_022068	PIEZO2
hsa_circ_0074958	0.00973243	4.78223	5.29715	5.18163	5.08865	P	P	P	3.39971	2.70816	2.54542	P	P	P	hsa_circ_0074958	circRNA	CCTGAAGCGGAATGCCGGGACATTCTGCTTCCTGTCATCACCAAAGAGCTGAAGGAGCTG	NA	NA	NA	NA	NA	NA	NA	NA	NA	NA	NA	---	NA	NA	hsa_circ_0074958	chr5	169230061	169506150	+	276089	2612	NM_004946	DOCK2
hsa_circ_0030584	5.31474e-07	4.77177	6.43223	6.37618	6.39733	P	P	P	4.13947	4.19028	4.11187	P	P	P	hsa_circ_0030584	circRNA	TTTTAGATTTCATCCAGGCACTTCGTCTTAGTAACATGGCCATGGGGAAGACAACCACAG	NA	NA	NA	NA	NA	NA	NA	NA	NA	NA	NA	---	NA	NA	hsa_circ_0030584	chr13	95768175	95863035	-	94860	2004	NM_005845	ABCC4
hsa_circ_0030571	0.00104358	4.76248	8.33568	8.32628	8.3894	P	P	P	5.93669	6.09338	6.24997	P	P	P	hsa_circ_0030571	circRNA	CGACAAGATAATGGTACAACTTAAAGAAACCATTGAAGATCTTCCTGGTAAAATGGATAC	NA	NA	NA	NA	NA	NA	NA	NA	NA	NA	NA	---	NA	NA	hsa_circ_0030571	chr13	95695935	95696692	-	757	279	NM_005845	ABCC4
hsa_circ_0030578	0.00254018	4.76022	7.98638	7.92451	7.83857	P	P	P	5.63483	5.39742	5.92029	P	P	P	hsa_circ_0030578	circRNA	TCGACAAAGTGCTGAAGTTGAGAATATGTCATCACTGTTAAGTGCCGTGCTCGGGGAATT	NA	NA	NA	NA	NA	NA	NA	NA	NA	NA	NA	---	NA	NA	hsa_circ_0030578	chr13	95725457	95839146	-	113689	1665	NM_005845	ABCC4
hsa_circ_0082894	0.0013909	4.75878	5.92919	6.43526	6.49709	P	P	P	3.61521	4.31654	4.15309	P	P	P	hsa_circ_0082894	circRNA	ACACATCTATTAAATGCTTCTGTTTTCATTTGCAGGACTGGCTGGCTTCGAGCAGGGCAT	NA	NA	NA	NA	NA	NA	NA	NA	NA	NA	NA	---	NA	NA	hsa_circ_0082894	chr7	150033806	150035245	+	1439	1439	NM_001142928	LRRC61
hsa_circ_0092269	2.98656e-05	4.75554	7.88334	7.84144	7.80334	P	P	P	5.52827	5.68099	5.56673	P	P	P	hsa_circ_0092269	circRNA	GGTCAGCAAGCTTTACAATGCAACAGGAACAAAGAAAAAGTCTTAGGATGCAGAAATAAT	NA	NA	NA	NA	NA	NA	NA	NA	NA	NA	NA	SPATC1	NA	NA	hsa_circ_0092269	chrY	21731270	21749393	+	18123	18123	NR_045128	TXLNG2P
hsa_circ_0015729	6.64611e-05	4.7531	10.0889	9.87948	9.79617	P	P	P	7.66975	7.57131	7.78487	P	P	P	hsa_circ_0015729	circRNA	ATACTGATAGCCAGATCACATTTGATTGACAGTCCACCAACTTACAATGCTGACTATGGC	NA	NA	NA	NA	NA	NA	NA	NA	NA	NA	NA	FRY	NA	NA	hsa_circ_0015729	chr1	186645598	186647536	-	1938	657	NM_000963	PTGS2
hsa_circ_0019248	0.000140346	4.74957	11.0448	10.7702	10.9161	P	P	P	8.68518	8.72483	8.58724	P	P	P	hsa_circ_0019248	circRNA	TATAGACTACAAGGGATCCCAACAAGCCCTCAGGATTCAGAAGTGTTAAAGCTCCTGTCA	NA	NA	NA	NA	NA	NA	NA	NA	NA	NA	NA	Cdk12	NA	NA	hsa_circ_0019248	chr10	96997329	96998442	-	1113	657	NM_020992	PDLIM1
hsa_circ_0075832	0.00013868	4.74926	5.98959	5.60349	5.8789	P	P	P	3.70739	3.37951	3.64814	P	P	P	hsa_circ_0075832	circRNA	TTTTGTTTCCCTCTGGAAACCACATGTGTACCTTGTTTGCAACAGTATGGGAGCTGTGGA	NA	NA	NA	NA	NA	NA	NA	NA	NA	NA	NA	---	NA	NA	hsa_circ_0075832	chr6	22056774	22111149	+	54375	319	NR_015410	LINC00340
hsa_circ_0060292	0.0100244	4.74218	4.63968	5.79794	5.65976	P	P	P	3.69434	2.77391	2.97536	P	P	P	hsa_circ_0060292	circRNA	TGAATAAACTGACATGCATGCTTCAGAATTGGTTCTAAAGAGTGGTGAGTCAGAAGAGAC	NA	NA	NA	NA	NA	NA	NA	NA	NA	NA	NA	---	NA	NA	hsa_circ_0060292	chr20	35929610	35945663	+	16053	1159	NM_022077	MANBAL
hsa_circ_0021065	0.00337195	4.73015	4.8025	4.41955	4.50616	P	P	P	2.37418	1.87735	2.67118	A	A	P	hsa_circ_0021065	circRNA	AACCTGACAGGGAGGCCTCAAGTCCATGGTATATGTGAAGGTGTTTCTGTCAGACGAGAA	NA	NA	NA	NA	NA	NA	NA	NA	NA	NA	NA	---	NA	NA	hsa_circ_0021065	chr11	6650682	6655251	-	4569	3175	NM_003737	DCHS1
hsa_circ_0069766	1.80988e-06	4.70318	5.82002	5.69485	5.76679	P	P	P	3.58506	3.48916	3.50745	P	P	P	hsa_circ_0069766	circRNA	CACCAATCATACTAAACTACAGGAGAAATATAATAGCTGGCATCACGGTGACTTCAATTA	NA	NA	NA	NA	NA	NA	NA	NA	NA	NA	NA	---	NA	NA	hsa_circ_0069766	chr4	55569889	55603446	+	33557	2046	NM_000222	KIT
hsa_circ_0075367	0.00840932	4.70151	3.91707	2.87633	3.82057	P	P	P	0.987888	0.965614	1.94255	A	A	A	hsa_circ_0075367	circRNA	ATGCTTTTAAATACAGTAGGTATAATAGACTACATTTTCTATTCTAAACCTCAGCTGAAC	NA	NA	NA	NA	NA	NA	NA	NA	NA	NA	NA	---	NA	NA	hsa_circ_0075367	chr5	180000987	180005353	+	4366	4366	NM_015455	CNOT6
hsa_circ_0012571	0.00041844	4.69849	3.49886	2.98872	3.24289	P	P	P	1.19456	1.04029	0.819609	A	A	A	hsa_circ_0012571	circRNA	TGGTCTTTTGCTTGTGGCTATAGGAATGAGGAATCACCCATTGGATTTGCGAGTGCAGTT	NA	NA	NA	NA	NA	NA	NA	NA	NA	NA	NA	---	NA	NA	hsa_circ_0012571	chr1	53329652	53343641	+	13989	600	NM_001004339	ZYG11A
hsa_circ_0017647	0.0302055	4.68772	3.32784	3.34512	3.43352	P	P	P	0.233289	1.17468	1.66977	A	A	A	hsa_circ_0017647	circRNA	CCGCCGGACGAAGAAGGCTCAAGCTTGGAGGAAACTGGCTTTAACTGGGGAGAATATTTG	NA	NA	NA	NA	NA	NA	NA	NA	NA	NA	NA	Mcm3ap	NA	NA	hsa_circ_0017647	chr10	7409610	7412337	-	2727	336	NM_001029880	SFMBT2
hsa_circ_0091320	4.73484e-05	4.66339	8.25593	8.26044	8.45278	P	P	P	6.02762	6.13343	6.14982	P	P	P	hsa_circ_0091320	circRNA	ATGTTATCAATTGTGACTTTATATGCCACACTTGGCAAAGAAGCAGTAGTTCATGGGCTA	NA	NA	NA	NA	NA	NA	NA	NA	NA	NA	NA	---	NA	NA	hsa_circ_0091320	chrX	108884563	108924604	-	40041	4301	NM_022977	ACSL4
hsa_circ_0054219	0.0199539	4.66187	7.45395	8.53945	8.46981	P	P	P	6.06644	6.12628	5.82279	P	P	P	hsa_circ_0054219	circRNA	ACCAAAGATCTGGCAGCAGAAGGGAAAAGAAAAAATAATGGAGAGAGAATGCTAACGAGC	NA	NA	NA	NA	NA	NA	NA	NA	NA	NA	NA	---	NA	NA	hsa_circ_0054219	chr2	39681437	39681506	+	69	69	NR_037875	LOC728730
hsa_circ_0019176	0.0341339	4.648	2.88483	4.44659	4.41376	P	P	P	1.20367	2.06102	2.13424	A	A	A	hsa_circ_0019176	circRNA	CAAGACTTTATGGACTTTCTACTTTCAAGGTACTATTCTGCCCTAAAAACTATGGAACAA	NA	NA	NA	NA	NA	NA	NA	NA	NA	NA	NA	---	NA	NA	hsa_circ_0019176	chr10	94669183	94715471	+	46288	1315	NM_019053	EXOC6
hsa_circ_0069764	0.030288	4.64702	6.00853	5.66498	5.5855	P	P	P	2.76765	3.07324	4.31315	A	P	P	hsa_circ_0069764	circRNA	GTAATATCAGACTAAACTACAGGAGAAATATAATAGCTGGCATCACGGTGACTTCAATTA	NA	NA	NA	NA	NA	NA	NA	NA	NA	NA	NA	---	NA	NA	hsa_circ_0069764	chr4	55569889	55573453	+	3564	359	NM_000222	KIT
hsa_circ_0042120	6.77374e-05	4.64421	6.46418	6.16432	6.41565	P	P	P	4.20675	4.21372	3.98328	P	P	P	hsa_circ_0042120	circRNA	TAGGGTTCTGGGACCTGATGCCCAGAACCCTGGACGGGCAGATCACCATGGAGAAGACGC	NA	NA	NA	NA	NA	NA	NA	NA	NA	NA	NA	---	NA	NA	hsa_circ_0042120	chr17	14248344	14249492	+	1148	1148	NM_006041	HS3ST3B1
hsa_circ_0051123	5.78984e-05	4.64073	8.21615	7.99054	8.13955	P	P	P	5.97764	5.85438	5.87721	P	P	P	hsa_circ_0051123	circRNA	CCAGAGCCTCGACGTGGACGAATGTCAGCTCTTCCGAGACCAGGTGTGCAAGAGTGGCGT	NA	NA	NA	NA	NA	NA	NA	NA	NA	NA	NA	---	NA	NA	hsa_circ_0051123	chr19	41129508	41129987	+	479	276	NM_001042544	LTBP4
hsa_circ_0030593	0.000578408	4.64012	9.26308	8.88645	8.70919	P	P	P	6.58452	6.64527	7.00601	P	P	P	hsa_circ_0030593	circRNA	ATTCTGATATTGAAAGATTCATCACTGTTAAGTGCCGTGCTCGGGGAATTGGCCCCAAGT	NA	NA	NA	NA	NA	NA	NA	NA	NA	NA	NA	---	NA	NA	hsa_circ_0030593	chr13	95822785	95839146	-	16361	471	NM_005845	ABCC4
hsa_circ_0028308	0.00196138	4.62588	10.8152	10.366	10.2433	P	P	P	8.34891	8.12491	8.37348	P	P	P	hsa_circ_0028308	circRNA	TTTGGAGATGTGCAGGATGGCATGACCATCGCCAAGGAGGAGATTGGCCGCGTAATCCAG	NA	NA	NA	NA	NA	NA	NA	NA	NA	NA	NA	---	NA	NA	hsa_circ_0028308	chr12	112229864	112236046	+	6182	453	NM_000690	ALDH2
hsa_circ_0030606	0.000209204	4.62172	7.80754	7.69357	7.70547	P	P	P	5.39537	5.66729	5.50838	P	P	P	hsa_circ_0030606	circRNA	GAACAAGTTTGATCAGGAAAGTGCCAAAGTAATCCAGCCCATATTTTTGGGAAAAATTAT	NA	NA	NA	NA	NA	NA	NA	NA	NA	NA	NA	---	NA	NA	hsa_circ_0030606	chr13	95862945	95887088	-	24143	315	NM_005845	ABCC4
hsa_circ_0030592	1.26926e-05	4.62107	7.80444	7.66649	7.60256	P	P	P	5.44351	5.42814	5.57972	P	P	P	hsa_circ_0030592	circRNA	TATTGAAAGATGATTTACAGCTGTTGGAGGATGGTGATCTGACTGTGATAGGAGATCGGG	NA	NA	NA	NA	NA	NA	NA	NA	NA	NA	NA	---	NA	NA	hsa_circ_0030592	chr13	95822785	95830345	-	7560	279	NM_005845	ABCC4
hsa_circ_0069045	0.000509617	4.62096	6.20738	6.04615	6.13177	P	P	P	4.11381	3.87098	3.75713	P	P	P	hsa_circ_0069045	circRNA	GATGAACACGTCAACTTTGACCATTTTCAGATTCTGCGGGCCATTGGTAAAGGGAGTTTT	NA	NA	NA	NA	NA	NA	NA	NA	NA	NA	NA	PARM1	NA	NA	hsa_circ_0069045	chr4	5141631	5399971	+	258340	420	NM_018401	STK32B
hsa_circ_0080914	2.72896e-05	4.61225	10.085	9.95946	9.97135	P	P	P	7.86483	7.85445	7.67574	P	P	P	hsa_circ_0080914	circRNA	ATTTCTCGTTTTGAATGCATGACCTGCAATGGGGAGAGTTATCGAGGTCTCATGGATCAT	NA	NA	NA	NA	NA	NA	NA	NA	NA	NA	NA	---	NA	NA	hsa_circ_0080914	chr7	81346547	81374436	-	27889	780	NM_000601	HGF
hsa_circ_0073001	0.0323381	4.61147	3.50194	4.73546	4.73443	P	P	P	2.10216	2.18908	2.36519	A	A	A	hsa_circ_0073001	circRNA	CCCTCTACAGAGTCTTTCATAATGGAAGGTTGGTGATTTGGATATCAGCTATATTAATAT	NA	NA	NA	NA	NA	NA	NA	NA	NA	NA	NA	INPP5D	NA	NA	hsa_circ_0073001	chr5	73136304	73164052	+	27748	1279	NM_001080479	RGNEF
hsa_circ_0015495	0.000881458	4.60435	11.2068	10.9166	11.3294	P	P	P	8.85464	9.0227	8.99151	P	P	P	hsa_circ_0015495	circRNA	AAGATAGCTCCCACTGTTTGGAAATTGGCAGATCGTTCTTCAAGGCCTTTACCAAGAACG	NA	NA	NA	NA	NA	NA	NA	NA	NA	NA	NA	Gm884	NA	NA	hsa_circ_0015495	chr1	180144455	180153185	+	8730	521	NM_002826	QSOX1
hsa_circ_0028302	0.00247936	4.60178	10.8603	10.323	10.2185	P	P	P	8.36398	8.09104	8.40552	P	P	P	hsa_circ_0028302	circRNA	TGTTTGGAGATGTGCAGGATGGCATGACCATCGCCAAGGAGGAGATTGGCTGCCGCGCGG	NA	NA	NA	NA	NA	NA	NA	NA	NA	NA	NA	---	NA	NA	hsa_circ_0028302	chr12	112204690	112236046	+	31356	1344	NM_000690	ALDH2
hsa_circ_0073781	0.000155645	4.59989	7.17415	7.10889	7.28684	P	P	P	4.95448	5.0041	5.01148	P	P	P	hsa_circ_0073781	circRNA	GGCTGTGTAGATATTCGCATGGAGCAGTGTTACTTGAAGTGGGATGAAGATGAATGCATC	NA	NA	NA	NA	NA	NA	NA	NA	NA	NA	NA	---	NA	NA	hsa_circ_0073781	chr5	127622409	127681276	-	58867	4023	NM_001999	FBN2
hsa_circ_0003344	0.0261641	4.58405	3.53868	3.86418	3.33595	P	P	P	0.572849	2.1139	1.06945	A	A	A	hsa_circ_0003344	circRNA	ACCTACATGACCCAGTGCCTGCAGGAGGAGCGCTACAGGTCGATAAGGGAGACCTGGTGG	NA	NA	NA	NA	NA	NA	NA	NA	NA	NA	NA	Rltpr	NA	NA	hsa_circ_0003344	chr1	205238077	205239012	+	935	935	NM_014858	TMCC2
hsa_circ_0077684	0.0360144	4.573	6.72838	7.77809	8.09679	P	P	P	5.40227	5.41384	5.52763	P	P	P	hsa_circ_0077684	circRNA	ACGAAAATTATGCTGGACCTAACTGTGAAAGAAATGCAATGCTGGATTCTTTCACACCCT	NA	NA	NA	NA	NA	NA	NA	NA	NA	NA	NA	---	NA	NA	hsa_circ_0077684	chr6	112522808	112537670	-	14862	308	NM_001105206	LAMA4
hsa_circ_0036522	4.36536e-05	4.57166	10.4815	10.4597	10.3008	P	P	P	8.21237	8.17467	8.28145	P	P	P	hsa_circ_0036522	circRNA	AGTGGTTGGTAATGGAATAAAGGATGCATGGATCAGAAGGCTGCAGCCGCCCTCCGCGCT	NA	NA	NA	NA	NA	NA	NA	NA	NA	NA	NA	---	NA	NA	hsa_circ_0036522	chr15	80987651	81047962	+	60311	2360	NM_021214	FAM108C1
hsa_circ_0078523	0.00265111	4.57018	5.59318	5.80532	5.46305	P	P	P	3.01127	3.69344	3.5174	P	P	P	hsa_circ_0078523	circRNA	GCTCAAGAAGAAGGTCAGTGCACCAGATATTCTGAAACCTCTCAATCAAGAGGATCCCAA	NA	NA	NA	NA	NA	NA	NA	NA	NA	NA	NA	PICALM	NA	NA	hsa_circ_0078523	chr6	159146534	159181777	+	35243	694	NM_001242394	SYTL3
hsa_circ_0030604	0.000384096	4.56729	8.00155	7.88334	7.99888	P	P	P	5.66731	5.68094	5.94705	P	P	P	hsa_circ_0030604	circRNA	AAGAATCCAGGTGGCTCAATCCCTTGTTTAAAATTGGCCATAAACGGAGATTAGAGGAAG	NA	NA	NA	NA	NA	NA	NA	NA	NA	NA	NA	---	NA	NA	hsa_circ_0030604	chr13	95858785	95900007	-	41222	1087	NM_005845	ABCC4
hsa_circ_0020967	5.64261e-05	4.56147	5.87812	6.01276	5.71301	P	P	P	3.55049	3.78427	3.70645	P	P	P	hsa_circ_0020967	circRNA	TTCAGTAATCACTCCTCGTTGTTTACCCCTGGACCCAGAGATTTTTTGACAGCTTTGGAA	NA	NA	NA	NA	NA	NA	NA	NA	NA	NA	NA	---	NA	NA	hsa_circ_0020967	chr11	5289579	5290906	-	1327	471	NM_005330	HBE1
hsa_circ_0088038	0.00873552	4.55591	3.23988	4.2241	4.14315	P	P	P	1.668	1.46237	2.04286	A	A	A	hsa_circ_0088038	circRNA	CTCCCTGACAACCCAGATAACAGAAATTCTGACAAAGATTAATGATGTATCACTGTTTAA	NA	NA	NA	NA	NA	NA	NA	NA	NA	NA	NA	Peli1	NA	NA	hsa_circ_0088038	chr9	114840817	114875148	-	34331	867	NM_022486	SUSD1
hsa_circ_0029914	0.0134791	4.51445	3.2703	4.10845	4.50235	P	P	P	1.06998	2.26501	2.02591	A	A	A	hsa_circ_0029914	circRNA	GCAAAAGCATTCAGTCTCAACCCAGAGCGATGAACAACAGCGAGATTATTTAATGGAAAG	NA	NA	NA	NA	NA	NA	NA	NA	NA	NA	NA	---	NA	NA	hsa_circ_0029914	chr13	32698422	32723971	+	25549	1015	NM_023037	FRY
hsa_circ_0073568	0.00491847	4.51272	4.90053	4.88855	4.86251	P	P	P	2.7805	2.91103	2.38861	P	P	A	hsa_circ_0073568	circRNA	GGGTACTGCGTATCTACATGAAAATGGGATTGTCCATCGTGATCTCAAACCAGAGAATCT	NA	NA	NA	NA	NA	NA	NA	NA	NA	NA	NA	---	NA	NA	hsa_circ_0073568	chr5	110782383	110784901	+	2518	166	NM_001744	CAMK4
hsa_circ_0048036	0.0448832	4.50668	2.65971	4.12819	4.51446	P	P	P	2.40225	1.10591	1.5436	A	A	A	hsa_circ_0048036	circRNA	CTGTTTTATTTATTAAACTTGATTTGAAGCCCTCTACGAGAACGAAGACCAGCTGCTCTG	NA	NA	NA	NA	NA	NA	NA	NA	NA	NA	NA	---	NA	NA	hsa_circ_0048036	chr19	305574	313643	-	8069	2098	NM_017550	MIER2
hsa_circ_0074953	0.0178385	4.50423	3.01903	2.52656	2.98261	P	P	P	0.249852	0.112202	1.35828	A	A	A	hsa_circ_0074953	circRNA	ACACGCCAAATACAACAAAATCCTGAATAACCAACTCCTGTATGAGTTCTACACCTGCAT	NA	NA	NA	NA	NA	NA	NA	NA	NA	NA	NA	---	NA	NA	hsa_circ_0074953	chr5	169188522	169435601	+	247079	726	NM_004946	DOCK2
hsa_circ_0003818	0.00703401	4.50271	2.78895	3.85474	3.51195	P	P	P	0.684599	1.42393	1.58068	A	A	A	hsa_circ_0003818	circRNA	GCACCAAATTACTTAGATGTATACAATAACAAAGTTTGTGGGGACATTCATGGACAATTC	NA	NA	NA	NA	NA	NA	NA	NA	NA	NA	NA	Eif4h	NA	NA	hsa_circ_0003818	chr4	102001688	102030235	-	28547	696	NM_000944	PPP3CA
hsa_circ_0046856	0.00247018	4.50225	8.49612	8.09255	8.05618	P	P	P	6.13516	6.02737	6.00969	P	P	P	hsa_circ_0046856	circRNA	ATTTTAATAAAAAATTGAAATGGAGCTCTGCCAGTGCCGGCCGGGAGAAGGCAATTGCTC	NA	NA	NA	NA	NA	NA	NA	NA	NA	NA	NA	SPATA20	NA	NA	hsa_circ_0046856	chr18	9359969	9402418	+	42449	3442	NM_020648	TWSG1
hsa_circ_0079579	0.00096721	4.49946	6.62016	7.1097	6.76608	P	P	P	4.82138	4.59993	4.59837	P	P	P	hsa_circ_0079579	circRNA	CTTGACGCAGAATAAATTTTTTCATCATTTAGGTGCAGCTCAGGGAAGAATTTATGGAAA	NA	NA	NA	NA	NA	NA	NA	NA	NA	NA	NA	---	NA	NA	hsa_circ_0079579	chr7	23349827	23353272	-	3445	2498	NM_006547	IGF2BP3
hsa_circ_0010872	0.000841914	4.49617	11.9615	11.5195	11.5859	P	P	P	9.73822	9.63692	9.16337	P	P	P	hsa_circ_0010872	circRNA	CTCGGCCGTGTCCTGACACCTCCAGACAGCCGAGCTCACTCCGGAACTTGTCATCTCCAA	NA	NA	NA	NA	NA	NA	NA	NA	NA	NA	NA	---	NA	NA	hsa_circ_0010872	chr1	23885425	23885510	-	85	85	NM_002167	ID3
hsa_circ_0088345	0.00036574	4.49527	10.1352	9.94982	9.84197	P	P	P	7.80252	7.87713	7.75489	P	P	P	hsa_circ_0088345	circRNA	TGCACTTTCACTAATATCTACTCTGGATGATGCCACTGATGCCTGGGGAATAAAGGTGGA	NA	NA	NA	NA	NA	NA	NA	NA	NA	NA	NA	Pax8	NA	NA	hsa_circ_0088345	chr9	124101352	124110427	-	9075	2469	NM_004099	STOM
hsa_circ_0030608	0.00145507	4.49388	8.06956	7.9741	7.9469	P	P	P	5.59341	5.86604	6.00077	P	P	P	hsa_circ_0030608	circRNA	TTATCGGAAGGTGGCTCAATCCCTTGTTTAAAATTGGCCATAAACGGAGATTAGAGGAAG	NA	NA	NA	NA	NA	NA	NA	NA	NA	NA	NA	---	NA	NA	hsa_circ_0030608	chr13	95886863	95900007	-	13144	457	NM_005845	ABCC4
hsa_circ_0022106	0.0035324	4.49004	3.18443	4.03848	3.70577	P	P	P	1.83806	0.999055	1.59287	A	A	A	hsa_circ_0022106	circRNA	TTGGAAACCAGGACAAGTCAAAGAAGAAGAAGAAAGTAAAGGTAAAGATGGAAAAGAAAT	NA	NA	NA	NA	NA	NA	NA	NA	NA	NA	NA	orc6	NA	NA	hsa_circ_0022106	chr11	57093458	57094363	-	905	681	NM_003146	SSRP1
hsa_circ_0019249	1.63858e-05	4.48843	9.85973	9.73235	9.77979	P	P	P	7.71784	7.62336	7.52873	P	P	P	hsa_circ_0019249	circRNA	ATAGACTACAACTTAGACCATGCTCAGCCTCCAAGCAGCCTTGTCATCGACAAAGAATCT	NA	NA	NA	NA	NA	NA	NA	NA	NA	NA	NA	Cdk12	NA	NA	hsa_circ_0019249	chr10	96997329	97007123	-	9794	809	NM_020992	PDLIM1
hsa_circ_0030603	0.000245381	4.48758	8.1227	7.92911	7.71581	P	P	P	5.90286	5.62704	5.75529	P	P	P	hsa_circ_0030603	circRNA	AAGAATCCAGGTGACAGTGTTCTTACACTTCCTGTGGGCAGGACCACTGCAGGCGATTGC	NA	NA	NA	NA	NA	NA	NA	NA	NA	NA	NA	---	NA	NA	hsa_circ_0030603	chr13	95858785	95861851	-	3066	540	NM_005845	ABCC4
hsa_circ_0025427	0.0129605	4.48744	4.19303	3.85203	3.98464	P	P	P	2.39165	1.59659	1.35038	A	A	A	hsa_circ_0025427	circRNA	GTTGGTTGAAGTCCCAAAGTCTTCATCCAATGAGGAGGTAATGTTCCTCACTGTCCAAGT	NA	NA	NA	NA	NA	NA	NA	NA	NA	NA	NA	---	NA	NA	hsa_circ_0025427	chr12	9242497	9265132	-	22635	2448	NM_000014	A2M
hsa_circ_0057995	0.00762627	4.48699	3.99321	3.79309	3.09675	P	P	P	1.86461	0.789474	1.66677	A	A	A	hsa_circ_0057995	circRNA	CTGCCTTTAGATTCTTCAGCTTGTCTCTAACCGAGGAAGCATTGATTGGGAGCTACTCAT	NA	NA	NA	NA	NA	NA	NA	NA	NA	NA	NA	---	NA	NA	hsa_circ_0057995	chr2	210444759	210543409	+	98650	547	NM_002374	MAP2
hsa_circ_0032976	0.000134791	4.48638	9.55392	9.30242	9.37254	P	P	P	7.37926	7.30509	7.03777	P	P	P	hsa_circ_0032976	circRNA	CAGTGCTTAGATGTGGACGAGTGTGCAACAGATTCCCACCAGTGCAACCCCACCCAGATC	NA	NA	NA	NA	NA	NA	NA	NA	NA	NA	NA	---	NA	NA	hsa_circ_0032976	chr14	92361293	92361416	-	123	123	NM_006329	FBLN5
hsa_circ_0015342	0.0352605	4.48506	3.45751	5.01629	4.88371	P	P	P	2.70553	2.59227	1.88518	A	A	A	hsa_circ_0015342	circRNA	CCCAGGTTGAAAAGGAGTGCAAAGAAAAAGAGTCATTTGATCTTTTGGTAAAGAATCTAA	NA	NA	NA	NA	NA	NA	NA	NA	NA	NA	NA	---	NA	NA	hsa_circ_0015342	chr1	174976233	174977842	+	1609	198	NM_014412	CACYBP
hsa_circ_0084660	0.0134095	4.48322	4.03848	4.61086	4.92035	P	P	P	2.17293	1.6681	3.03255	A	A	P	hsa_circ_0084660	circRNA	TCGTTTCCAGAATCTGCAAAATGGCTGATAATTTGGATGAATTTATTGAAGAGCAAAAAG	NA	NA	NA	NA	NA	NA	NA	NA	NA	NA	NA	---	NA	NA	hsa_circ_0084660	chr8	67986477	68066371	+	79894	2128	NM_024790	CSPP1
hsa_circ_0083490	0.000628679	4.48009	5.3102	5.10824	5.29078	P	P	P	2.87239	3.30198	3.01928	P	P	P	hsa_circ_0083490	circRNA	ACAGCAGCTGAGCTGCCAACTTCAGGAACTTTACCTTCATCCAGCTGAATGGAGAATTTT	NA	NA	NA	NA	NA	NA	NA	NA	NA	NA	NA	---	NA	NA	hsa_circ_0083490	chr8	19276166	19278029	-	1863	274	NM_001130518	CSGALNACT1
hsa_circ_0080916	5.63302e-05	4.47672	9.54239	9.31821	9.3604	P	P	P	7.31755	7.24941	7.17306	P	P	P	hsa_circ_0080916	circRNA	TCTATGATCACTTTTTGCCTTCGAGCTATCGGGGTAAAGACCTACAGGAAAACTACTGTC	NA	NA	NA	NA	NA	NA	NA	NA	NA	NA	NA	---	NA	NA	hsa_circ_0080916	chr7	81380215	81381578	-	1363	1363	NM_001010934	HGF
hsa_circ_0091325	0.00453079	4.46569	7.05025	6.99055	6.90135	P	P	P	4.74994	4.5225	5.13063	P	P	P	hsa_circ_0091325	circRNA	CTCTGACCAGGCGTACTTTATTGTCGGCTTCCAAAGATTACTAACTTTTATCTGTATCAC	NA	NA	NA	NA	NA	NA	NA	NA	NA	NA	NA	---	NA	NA	hsa_circ_0091325	chrX	108921216	108926895	-	5679	1233	NM_022977	ACSL4
hsa_circ_0049236	6.28861e-05	4.46186	7.96853	8.18891	8.24747	P	P	P	5.93054	6.10446	5.90335	P	P	P	hsa_circ_0049236	circRNA	TTCCTTTGTGTTAGTTAATAAAGCTTTCTCAACTGCCGGACTCCAGAACGGGTGGAACTG	NA	NA	NA	NA	NA	NA	NA	NA	NA	NA	NA	---	NA	NA	hsa_circ_0049236	chr19	10394156	10397291	+	3135	2596	NM_000201	ICAM1
hsa_circ_0077888	8.34902e-05	4.46123	8.17811	7.90823	7.9247	P	P	P	5.95698	5.84212	5.74818	P	P	P	hsa_circ_0077888	circRNA	TATGTTGTGATTGGAGATGGCCGAGATGAGGAGCATGCCGCTAACCAGTAATTACAAGTA	NA	NA	NA	NA	NA	NA	NA	NA	NA	NA	NA	---	NA	NA	hsa_circ_0077888	chr6	133782251	133846253	+	64002	1469	NM_172105	EYA4
hsa_circ_0030583	0.000631249	4.46037	9.17451	8.82166	8.73208	P	P	P	6.63614	6.53287	7.0689	P	P	P	hsa_circ_0030583	circRNA	TTTCATCCAGGAGTAAAACTGCAACTTTCACGGATGCCAGGATCAGGACCATGAATGAAG	NA	NA	NA	NA	NA	NA	NA	NA	NA	NA	NA	---	NA	NA	hsa_circ_0030583	chr13	95768175	95860179	-	92004	1750	NM_005845	ABCC4
hsa_circ_0042052	0.00732568	4.45512	9.94135	10.5438	10.5963	P	P	P	8.32373	8.20314	8.17062	P	P	P	hsa_circ_0042052	circRNA	AAATGTCAGACTCAATAAATGTACACTGAAGTCTTCCTCCTTCCCTGGACACATCCCGGA	NA	NA	NA	NA	NA	NA	NA	NA	NA	NA	NA	Crhr2	NA	NA	hsa_circ_0042052	chr17	8706054	8726814	-	20760	1285	NM_001010855	PIK3R6
hsa_circ_0010435	3.5479e-05	4.44929	11.3114	11.1456	11.1075	P	P	P	8.98306	9.01181	9.11382	P	P	P	hsa_circ_0010435	circRNA	ACTTTCCTTGCTGTGTGGACTTGAAACAAAATAAAATGTGTTGCTTCGCCCTGTGCCCTG	NA	NA	NA	NA	NA	NA	NA	NA	NA	NA	NA	MEG3	NA	NA	hsa_circ_0010435	chr1	21046224	21049408	-	3184	2424	NM_001103161	SH2D5
hsa_circ_0083241	0.022703	4.44885	4.60709	4.35622	4.55502	P	P	P	2.6954	2.58473	1.53068	P	P	A	hsa_circ_0083241	circRNA	ATCCTCCTGGGAAGCTGCACTGCACCAGGAATTACATCCACCTGAACCTGTTCCTGTCCT	NA	NA	NA	NA	NA	NA	NA	NA	NA	NA	NA	TTLL5	NA	NA	hsa_circ_0083241	chr7	158835725	158835867	-	142	142	NM_003382	VIPR2
hsa_circ_0046929	0.000118312	4.44835	5.93463	6.14695	5.90641	P	P	P	3.63766	3.92618	3.95563	P	P	P	hsa_circ_0046929	circRNA	CCTTGCCGAGCCAAATGAAAATCAAACAAACATCCCCTTTAATGAGTTGAACAAGTCTCT	NA	NA	NA	NA	NA	NA	NA	NA	NA	NA	NA	COX17	NA	NA	hsa_circ_0046929	chr18	10759702	10762623	-	2921	532	NM_022068	PIEZO2
hsa_circ_0016294	0.000119292	4.44494	10.4425	10.2778	10.3752	P	P	P	8.18594	8.36295	8.08061	P	P	P	hsa_circ_0016294	circRNA	GTGACCCGTTGCCAGAGTGCAGAGGTACAAATTATTTGGCTCGACTTCTAGTTTTTGTCT	NA	NA	NA	NA	NA	NA	NA	NA	NA	NA	NA	---	NA	NA	hsa_circ_0016294	chr1	207500096	207500182	+	86	86	NM_001114752	CD55
hsa_circ_0068876	0.00503114	4.43664	3.34381	3.84795	3.93355	P	P	P	1.42284	1.08872	2.06005	A	A	A	hsa_circ_0068876	circRNA	CTTTCCGAAAAATAAAGACACCTGGTTGCTAACCTGGTGCATCCACAGGGACCTGGCTGC	NA	NA	NA	NA	NA	NA	NA	NA	NA	NA	NA	---	NA	NA	hsa_circ_0068876	chr4	1807777	1810599	+	2822	2195	NM_001163213	FGFR3
hsa_circ_0014002	0.000763559	4.43431	7.835	8.02075	8.00124	P	P	P	6.02348	5.7694	5.59232	P	P	P	hsa_circ_0014002	circRNA	AGAAGGCCTCCAAATATAGAAACAATCCCATTAGTCAGCTTCCGGTAGTGAGAACCCTTC	NA	NA	NA	NA	NA	NA	NA	NA	NA	NA	NA	---	NA	NA	hsa_circ_0014002	chr1	150266268	150280819	+	14551	939	NM_018997	MRPS21
hsa_circ_0016295	0.000692962	4.43054	9.28815	8.8388	8.97692	P	P	P	6.96241	6.97135	6.75475	P	P	P	hsa_circ_0016295	circRNA	GAATGCAGAGAAATTTATTGTCCAGCACCACCACAAATTGACAATGGAATAATTCAAGGG	NA	NA	NA	NA	NA	NA	NA	NA	NA	NA	NA	---	NA	NA	hsa_circ_0016295	chr1	207504452	207504641	+	189	189	NM_001114752	CD55
hsa_circ_0015498	0.00126758	4.40815	11.0846	10.9857	11.3297	P	P	P	8.96656	9.05431	8.97911	P	P	P	hsa_circ_0015498	circRNA	CTCCTACCTGGGTAGAGAGGCTGGAGGAGATTGATGGATTCTTTGCGAGAAATAACGAAG	NA	NA	NA	NA	NA	NA	NA	NA	NA	NA	NA	Gm8909	NA	NA	hsa_circ_0015498	chr1	180147928	180148019	+	91	91	NM_002826	QSOX1
hsa_circ_0061079	0.0180719	4.4072	4.3369	3.84713	4.18534	P	P	P	1.32876	2.62268	1.72599	A	A	A	hsa_circ_0061079	circRNA	CAGCAAGGCGAGCCAGTTCCTGTGCTTGGCCGTGCAAGAAGGCAGCCTCGTGCTGTTGTA	NA	NA	NA	NA	NA	NA	NA	NA	NA	NA	NA	---	NA	NA	hsa_circ_0061079	chr20	60887943	60888066	-	123	123	NM_005560	LAMA5
hsa_circ_0030590	0.00153172	4.40402	8.96897	8.71467	8.63957	P	P	P	6.60215	6.66773	6.65704	P	P	P	hsa_circ_0030590	circRNA	TTTCATACTGGAGTAAAACTGCAACTTTCACGGATGCCAGGATCAGGACCATGAATGAAG	NA	NA	NA	NA	NA	NA	NA	NA	NA	NA	NA	---	NA	NA	hsa_circ_0030590	chr13	95815863	95860179	-	44316	1428	NM_005845	ABCC4
hsa_circ_0091323	0.00166328	4.40295	7.19665	7.09561	7.14219	P	P	P	4.78862	5.02608	5.17953	P	P	P	hsa_circ_0091323	circRNA	TGCTGTTCCGGCGTACTTTATTGTCGGCTTCCAAAGATTACTAACTTTTATCTGTATCAC	NA	NA	NA	NA	NA	NA	NA	NA	NA	NA	NA	---	NA	NA	hsa_circ_0091323	chrX	108917630	108926895	-	9265	1305	NM_022977	ACSL4
hsa_circ_0063791	0.00395735	4.39471	6.02337	6.65809	6.50165	P	P	P	4.2923	4.39178	4.15495	P	P	P	hsa_circ_0063791	circRNA	ACGCCAGCGAGGCGAATATGAGGCCGCGCTGACCATCTACGATACCCACATCCTTCCCAG	NA	NA	NA	NA	NA	NA	NA	NA	NA	NA	NA	Snora5c	NA	NA	hsa_circ_0063791	chr22	46681137	46684485	+	3348	287	NM_017931	TTC38
hsa_circ_0025417	0.00855704	4.39051	4.43215	3.96344	4.22277	P	P	P	1.88468	2.59164	1.58601	A	A	A	hsa_circ_0025417	circRNA	CTCCACCCAGGACATGGGCTTAAAGGCATTCACCAACTCAAAGATTCGTAAACCCAAAAT	NA	NA	NA	NA	NA	NA	NA	NA	NA	NA	NA	---	NA	NA	hsa_circ_0025417	chr12	9227155	9247680	-	20525	1743	NM_000014	A2M
hsa_circ_0062139	0.00587201	4.38615	3.83991	4.71398	4.71511	P	P	P	2.71023	2.38025	1.80164	P	P	A	hsa_circ_0062139	circRNA	TGTTCTTCTTCGAGTATTTGTAGAAGGGGTAAAGACCTAGAGGTGAGGTCTCTGAGCAAG	NA	NA	NA	NA	NA	NA	NA	NA	NA	NA	NA	Psmg4	NA	NA	hsa_circ_0062139	chr22	17100506	17119630	+	19124	483	TCONS_l2_00018139	TCONS_l2_00018139
hsa_circ_0073799	5.94881e-05	4.38188	6.58626	6.65568	6.71219	P	P	P	4.39007	4.57582	4.58793	P	P	P	hsa_circ_0073799	circRNA	CAAAAAATTCAGCGATTTGTAGAAATAGTTGTGGAGATGGATTTTGTTCCCGTCCTAACA	NA	NA	NA	NA	NA	NA	NA	NA	NA	NA	NA	---	NA	NA	hsa_circ_0073799	chr5	127704874	127866386	-	161512	1911	NM_001999	FBN2
hsa_circ_0073788	0.000181779	4.37792	7.6818	7.67523	7.63971	P	P	P	5.56616	5.44379	5.5921	P	P	P	hsa_circ_0073788	circRNA	GTTTGTGAAGATATTGATGAGTGCATCCAGAATGGGGTTCTTTGTAAAAACGGTCGATGC	NA	NA	NA	NA	NA	NA	NA	NA	NA	NA	NA	---	NA	NA	hsa_circ_0073788	chr5	127641514	127713570	-	72056	3825	NM_001999	FBN2
hsa_circ_0046913	6.49386e-05	4.3747	5.63428	5.89076	5.61197	P	P	P	3.43957	3.70655	3.60777	P	P	P	hsa_circ_0046913	circRNA	TGACTGAGAGCCAAATGAAAATCAAACAAACATCCCCTTTAATGAGTTGAACAAGTCTCT	NA	NA	NA	NA	NA	NA	NA	NA	NA	NA	NA	CORO1C	NA	NA	hsa_circ_0046913	chr18	10696071	10762623	-	66552	3803	NM_022068	PIEZO2
hsa_circ_0054992	0.00131321	4.37357	6.19436	5.93609	5.93762	P	P	P	3.56404	3.97297	4.1066	P	P	P	hsa_circ_0054992	circRNA	TGAACAATTGATTTGAGGTGTTCTGACCAGAAGAAGACAGAGCGGATGATCATTCATTCA	NA	NA	NA	NA	NA	NA	NA	NA	NA	NA	NA	---	NA	NA	hsa_circ_0054992	chr2	66662531	66775151	+	112620	1422	NM_002398	MEIS1
hsa_circ_0031208	3.83716e-05	4.36958	8.58529	8.56663	8.49755	P	P	P	6.49191	6.44793	6.32337	P	P	P	hsa_circ_0031208	circRNA	GGGCTTGTGTCTTTGTCATTGTCTGGTTCTTAAGAGTCCCAGGTGATGCTAGCGAGGAGG	NA	NA	NA	NA	NA	NA	NA	NA	NA	NA	NA	LOC101503391	NA	NA	hsa_circ_0031208	chr14	21989472	21993788	-	4316	4316	NM_005407	SALL2
hsa_circ_0025414	0.0003895	4.36288	7.25022	7.29172	7.24579	P	P	P	5.01835	5.19322	5.19377	P	P	P	hsa_circ_0025414	circRNA	AATACAGCATGAAAGTGACAGGAGAAGGATGTGTCTACCTCCAGGCAGTATATGGTTCTG	NA	NA	NA	NA	NA	NA	NA	NA	NA	NA	NA	---	NA	NA	hsa_circ_0025414	chr12	9225248	9266139	-	40891	3889	NM_000014	A2M
hsa_circ_0025760	2.76313e-05	4.36149	7.8735	7.68541	7.86226	P	P	P	5.63368	5.58811	5.82175	P	P	P	hsa_circ_0025760	circRNA	AAACAGAATGAAATTTGGCTGTCAAGAGAGTCCCTATTCAGGAGTCTGGATCAGGGCTGT	NA	NA	NA	NA	NA	NA	NA	NA	NA	NA	NA	RSPH1	NA	NA	hsa_circ_0025760	chr12	29736339	29908818	-	172479	864	NM_175861	TMTC1
hsa_circ_0073198	0.00027444	4.35656	5.63278	5.21252	5.52771	P	P	P	3.20062	3.52341	3.29235	P	P	P	hsa_circ_0073198	circRNA	CTCTAAGCAGGTCTGATGCCCGTCTTCATAAAGACGACACTGACATTTGCTTCAGTAAAA	NA	NA	NA	NA	NA	NA	NA	NA	NA	NA	NA	hells	NA	NA	hsa_circ_0073198	chr5	80408428	80508382	+	99954	1516	NM_006909	RASGRF2
hsa_circ_0030605	0.000318714	4.35506	8.58769	8.3287	8.26003	P	P	P	6.05078	6.23715	6.50507	P	P	P	hsa_circ_0030605	circRNA	TGAGAGGGTGTCAGAGGCAATCGTCAGCATCCGAAGAATCCAGGAGCGGACAGGCGTGGC	NA	NA	NA	NA	NA	NA	NA	NA	NA	NA	NA	---	NA	NA	hsa_circ_0030605	chr13	95858785	95953687	-	94902	1280	NM_005845	ABCC4
hsa_circ_0061091	0.0111023	4.35021	4.24137	3.72276	4.23679	P	P	P	2.48048	1.87811	1.29866	A	A	A	hsa_circ_0061091	circRNA	TACCTGTGACACAGACAGCGGCCAGTGCAAGCACAGGTTCCCTGTATGTGCCGGGCTCAC	NA	NA	NA	NA	NA	NA	NA	NA	NA	NA	NA	---	NA	NA	hsa_circ_0061091	chr20	60903296	60911501	-	8205	2435	NM_005560	LAMA5
hsa_circ_0073796	0.00028538	4.34787	7.16573	6.79257	6.76271	P	P	P	4.64595	4.69404	5.02566	P	P	P	hsa_circ_0073796	circRNA	GTATGTTTGGAGGAATATCGCAGACTTTGCATGGATGGACTTCCAATGGGAGGAATTCCA	NA	NA	NA	NA	NA	NA	NA	NA	NA	NA	NA	---	NA	NA	hsa_circ_0073796	chr5	127685038	127729061	-	44023	1758	NM_001999	FBN2
hsa_circ_0003368	0.0413831	4.34127	3.60674	3.50027	5.02064	P	P	P	1.66716	2.27003	2.2901	A	A	A	hsa_circ_0003368	circRNA	TTCTTGGAAGAGGAAGTATCATTCTGCAAAGGAGGCATATGAACAACTTTTGCAGACAGA	NA	NA	NA	NA	NA	NA	NA	NA	NA	NA	NA	Trpc1	NA	NA	hsa_circ_0003368	chrY	15478146	15481229	-	3083	221	NM_007125	UTY
hsa_circ_0082717	0.00033418	4.34049	6.057	6.15354	6.21196	P	P	P	4.16941	4.03934	3.84623	P	P	P	hsa_circ_0082717	circRNA	GATGCCAAAGGTGACCTGGAACTCCCCTCGGTACTGACATGATGACAGTGTGCAGGCCGG	NA	NA	NA	NA	NA	NA	NA	NA	NA	NA	NA	---	NA	NA	hsa_circ_0082717	chr7	140221654	140305606	-	83952	6320	NM_015689	DENND2A
hsa_circ_0069726	7.06918e-05	4.3312	9.32584	9.06308	9.07384	P	P	P	7.06471	6.92213	7.13889	P	P	P	hsa_circ_0069726	circRNA	AAAGAGAATGTTTGGAAACACATGCTACTGTAACTCCGTGCTTCAGGCATTGTACTTCTG	NA	NA	NA	NA	NA	NA	NA	NA	NA	NA	NA	TP53I13	NA	NA	hsa_circ_0069726	chr4	53494116	53494330	-	214	214	NM_001134223	USP46
hsa_circ_0005094	0.0129201	4.32504	6.15489	5.91228	5.99445	P	P	P	3.46313	3.68424	4.40987	P	P	P	hsa_circ_0005094	circRNA	TGCAAAACTGGAATTACTGAACCTTCAACATGCCTACTATAAACTAAACAGACAATACCA	NA	NA	NA	NA	NA	NA	NA	NA	NA	NA	NA	---	NA	NA	hsa_circ_0005094	chr18	66678170	66721370	+	43200	275	NM_001093729	CCDC102B
hsa_circ_0069729	0.00257566	4.3202	10.2853	10.8336	10.9372	P	P	P	8.71371	8.68922	8.37721	P	P	P	hsa_circ_0069729	circRNA	TGGCAGGTTAATAAACTTACTTGGCCTGACGTTGACAACTACAGGCACAAGCCATTGAAG	NA	NA	NA	NA	NA	NA	NA	NA	NA	NA	NA	nav2	NA	NA	hsa_circ_0069729	chr4	53579660	53580305	+	645	645	NR_024031	SNHG13
hsa_circ_0087308	0.000437422	4.31787	5.40495	5.04351	5.43925	P	P	P	3.47071	3.06587	3.00705	P	P	P	hsa_circ_0087308	circRNA	AAAGGCTTTAGTACCAATAATGCATACTCCTTCCACGTTACTGCAGACGGTCAGATGCAG	NA	NA	NA	NA	NA	NA	NA	NA	NA	NA	NA	Rere	NA	NA	hsa_circ_0087308	chr9	84198597	84208189	-	9592	1497	NM_005077	TLE1
hsa_circ_0087323	0.000620111	4.31108	5.95362	6.11525	6.14249	P	P	P	4.1898	3.8042	3.87019	P	P	P	hsa_circ_0087323	circRNA	CTCCGTCCAGACTGAAATCGCCAAGAGATTGAATACGATTTGTGCACAAGTCATCCCATT	NA	NA	NA	NA	NA	NA	NA	NA	NA	NA	NA	REST	NA	NA	hsa_circ_0087323	chr9	84228336	84268951	-	40615	784	NM_005077	TLE1
hsa_circ_0046944	0.00208802	4.30436	7.50783	7.35775	7.22669	P	P	P	5.49233	5.32867	4.90615	P	P	P	hsa_circ_0046944	circRNA	GGGGAGACAGATCATCAGAAAAGCCCTTACTGAGGAAAAACGTGTCTCAACAAAAACATC	NA	NA	NA	NA	NA	NA	NA	NA	NA	NA	NA	---	NA	NA	hsa_circ_0046944	chr18	11999052	12014372	+	15320	394	NM_014214	IMPA2
hsa_circ_0065064	0.000471863	4.30055	7.12994	7.4575	7.5748	P	P	P	5.36797	5.11925	5.38254	P	P	P	hsa_circ_0065064	circRNA	AATAAAAATAATAGTCTTGGAGTCTCGCCAGTCTGTGCATCATCGAGTCTGTGTTTGAGG	NA	NA	NA	NA	NA	NA	NA	NA	NA	NA	NA	---	NA	NA	hsa_circ_0065064	chr3	45123768	45152333	-	28565	5217	NM_022842	CDCP1
hsa_circ_0051780	0.000954155	4.30021	7.15597	7.01809	7.21089	P	P	P	4.93712	5.26415	4.8426	P	P	P	hsa_circ_0051780	circRNA	TGGAGCTGAACCTACTGGGGACGTACACCTTGACCAAGACCCTGGTTTCTGAGACCATCC	NA	NA	NA	NA	NA	NA	NA	NA	NA	NA	NA	---	NA	NA	hsa_circ_0051780	chr19	49334924	49335989	-	1065	159	NM_016246	HSD17B14
hsa_circ_0063517	0.0379514	4.29517	8.32692	9.72517	9.52058	P	P	P	7.32598	7.28604	6.98069	P	P	P	hsa_circ_0063517	circRNA	AAAGTCGTGTGGCAGCTTCATCTGCAGATCTCCAGGGGAGCCCACCAGCCTAGTCAACAT	NA	NA	NA	NA	NA	NA	NA	NA	NA	NA	NA	H2-M2	NA	NA	hsa_circ_0063517	chr22	41641614	41677086	-	35472	2794	NM_002883	RANGAP1
hsa_circ_0064393	0.0338842	4.29499	6.78897	8.26355	8.06854	P	P	P	6.10949	5.50446	5.50339	P	P	P	hsa_circ_0064393	circRNA	GCACCACGAGGACCTCGTGCAGGTGGAGGTGCTGCTGCTAAGGGCCGTGAGGATCCGCGC	NA	NA	NA	NA	NA	NA	NA	NA	NA	NA	NA	Ash1l	NA	NA	hsa_circ_0064393	chr3	13378286	13379417	-	1131	213	NM_024923	NUP210
hsa_circ_0015499	0.000101834	4.29143	11.6336	11.5642	11.8776	P	P	P	9.61626	9.74362	9.41088	P	P	P	hsa_circ_0015499	circRNA	GTTAAGGCAAGCTGGAGGAGATTGATGGATTCTTTGCGAGAAATAACGAAGAGTACCTGG	NA	NA	NA	NA	NA	NA	NA	NA	NA	NA	NA	Gm9047	NA	NA	hsa_circ_0015499	chr1	180147928	180167169	+	19241	2726	NM_002826	QSOX1
hsa_circ_0046916	0.000333644	4.28888	5.97662	6.26534	5.9449	P	P	P	4.18562	3.95925	3.72572	P	P	P	hsa_circ_0046916	circRNA	TCCCAAAGAGCCAAATGAAAATCAAACAAACATCCCCTTTAATGAGTTGAACAAGTCTCT	NA	NA	NA	NA	NA	NA	NA	NA	NA	NA	NA	CORO7	NA	NA	hsa_circ_0046916	chr18	10698922	10762623	-	63701	3307	NM_022068	PIEZO2
hsa_circ_0073037	0.0307053	4.28385	6.56863	7.70547	7.61521	P	P	P	5.30445	5.22958	5.30788	P	P	P	hsa_circ_0073037	circRNA	CCTCTGGCAGTTTTATCTCTCTAAGATGTTTTGAGCAGTGACATTATAATTCTGACAATA	NA	NA	NA	NA	NA	NA	NA	NA	NA	NA	NA	---	NA	NA	hsa_circ_0073037	chr5	74639677	74646774	+	7097	776	NM_000859	HMGCR
hsa_circ_0025741	0.017238	4.28081	2.92207	3.44792	3.51855	P	P	P	0.377081	1.71519	1.27185	A	A	A	hsa_circ_0025741	circRNA	AATTGCAACATATTAGTTTGCCTCGGAGCGTGTGAACATTCCTCCGCTCGGTTTTCAACT	NA	NA	NA	NA	NA	NA	NA	NA	NA	NA	NA	fryl	NA	NA	hsa_circ_0025741	chr12	28115253	28123200	-	7947	1816	NM_002820	PTHLH
hsa_circ_0064418	0.000232863	4.28013	5.58914	5.40449	5.82618	P	P	P	3.52593	3.33137	3.67964	P	P	P	hsa_circ_0064418	circRNA	TGTCCTGTGAAGGCTCCACCAAGGACCTGATCGAGACTTGCTGCGCAGCCGGACAGCAGT	NA	NA	NA	NA	NA	NA	NA	NA	NA	NA	NA	---	NA	NA	hsa_circ_0064418	chr3	13649561	13661331	+	11770	849	NM_001165035	FBLN2
hsa_circ_0080915	0.000602669	4.27921	10.1813	9.82194	9.9337	P	P	P	7.98258	7.84034	7.84102	P	P	P	hsa_circ_0080915	circRNA	TCAAGTGCAATTGAATGCATGACCTGCAATGGGGAGAGTTATCGAGGTCTCATGGATCAT	NA	NA	NA	NA	NA	NA	NA	NA	NA	NA	NA	---	NA	NA	hsa_circ_0080915	chr7	81358920	81374436	-	15516	415	NM_000601	HGF
hsa_circ_0030599	0.000921776	4.27838	9.08305	8.82694	8.68477	P	P	P	6.74916	6.70898	6.86913	P	P	P	hsa_circ_0030599	circRNA	TGTTCGAACTGAGTAAAACTGCAACTTTCACGGATGCCAGGATCAGGACCATGAATGAAG	NA	NA	NA	NA	NA	NA	NA	NA	NA	NA	NA	---	NA	NA	hsa_circ_0030599	chr13	95829960	95860179	-	30219	942	NM_005845	ABCC4
hsa_circ_0046920	0.00289372	4.26665	5.70386	5.79128	5.84815	P	P	P	3.94828	3.63487	3.43812	P	P	P	hsa_circ_0046920	circRNA	TTGAACGATGCATGCTGACCAGAGAAATTAAGAAGGCTGAAGGAGAAAAAATTGATTCAG	NA	NA	NA	NA	NA	NA	NA	NA	NA	NA	NA	Cotl1	NA	NA	hsa_circ_0046920	chr18	10715647	10857209	-	141562	4590	NM_022068	PIEZO2
hsa_circ_0015496	0.00390968	4.26283	10.3349	10.239	10.3562	P	P	P	8.28835	8.42157	7.89737	P	P	P	hsa_circ_0015496	circRNA	TTTGTTAAGGCAATTCTTCAAGGCCTTTACCAAGAACGGCTCGGGAGCAGTATTTCCAGT	NA	NA	NA	NA	NA	NA	NA	NA	NA	NA	NA	Gm884	NA	NA	hsa_circ_0015496	chr1	180144455	180167169	+	22714	2875	NM_002826	QSOX1
hsa_circ_0066518	9.7965e-05	4.26008	6.71453	6.73049	7.01084	P	P	P	4.77734	4.83413	4.57917	P	P	P	hsa_circ_0066518	circRNA	TTTCACATAGTTGCCTGTCTCGGGAAACTTGATTGATCTTTATGGAAACCAAGGTCTGCC	NA	NA	NA	NA	NA	NA	NA	NA	NA	NA	NA	---	NA	NA	hsa_circ_0066518	chr3	69998201	70017488	+	19287	3908	NM_000248	MITF
hsa_circ_0061707	0.00107991	4.25808	8.36557	7.99163	8.27499	P	P	P	6.2016	6.12286	6.05941	P	P	P	hsa_circ_0061707	circRNA	ATGATCAAAGCGCCAGCCAGCCTTTGACACCTTTGATGGGTCCCTGTTTGCTGTTTTTCC	NA	NA	NA	NA	NA	NA	NA	NA	NA	NA	NA	---	NA	NA	hsa_circ_0061707	chr21	40184926	40186905	+	1979	433	NM_005239	ETS2
hsa_circ_0044168	0.0025987	4.25596	6.12842	5.78324	5.99182	P	P	P	3.46377	4.04376	4.07076	P	P	P	hsa_circ_0044168	circRNA	ACCATGGACAAGCTGCTGGCAGACAGCAAGACGGCTCAGTGTCCCTGGACAGTGTCCTGG	NA	NA	NA	NA	NA	NA	NA	NA	NA	NA	NA	---	NA	NA	hsa_circ_0044168	chr17	43322619	43322783	+	164	164	NM_005892	FMNL1
hsa_circ_0012899	0.000104845	4.25502	7.89576	7.56838	7.75691	P	P	P	5.54786	5.55896	5.84521	P	P	P	hsa_circ_0012899	circRNA	ATTGGACCAGGTGAAGAAGTGGCAAGACCCAGGCGTTCCACACCAACTCCAGAACTTATA	NA	NA	NA	NA	NA	NA	NA	NA	NA	NA	NA	Mdr50	NA	NA	hsa_circ_0012899	chr1	67137626	67145435	+	7809	306	NM_032291	SGIP1
hsa_circ_0083944	0.00791838	4.25197	4.09941	4.92292	4.90147	P	P	P	2.63087	2.36098	2.77898	P	A	P	hsa_circ_0083944	circRNA	ATCATCAGTGAGAACTTGAACAATGAGGTCATGATGAAGACTGGAAGTGTCTCCAGAGGC	NA	NA	NA	NA	NA	NA	NA	NA	NA	NA	NA	gna15.1	NA	NA	hsa_circ_0083944	chr8	37727937	37730697	-	2760	2011	NM_001002814	RAB11FIP1
hsa_circ_0030602	0.00072414	4.24683	9.11227	8.74968	8.68468	P	P	P	6.70872	6.69007	6.91541	P	P	P	hsa_circ_0030602	circRNA	AAGAATCCAGGAGTAAAACTGCAACTTTCACGGATGCCAGGATCAGGACCATGAATGAAG	NA	NA	NA	NA	NA	NA	NA	NA	NA	NA	NA	---	NA	NA	hsa_circ_0030602	chr13	95858785	95860179	-	1394	376	NM_005845	ABCC4
hsa_circ_0080913	0.000477809	4.24677	8.8344	8.76665	8.86078	P	P	P	6.59137	6.73345	6.86645	P	P	P	hsa_circ_0080913	circRNA	TTACATTTCAAAATAAACATATCTGCGGAGGATCATTGATAAAGGAGAGTTGGGTTCTTA	NA	NA	NA	NA	NA	NA	NA	NA	NA	NA	NA	---	NA	NA	hsa_circ_0080913	chr7	81331443	81336680	-	5237	1099	NM_000601	HGF
hsa_circ_0047140	0.0273294	4.2426	6.73543	6.45239	6.66061	P	P	P	4.09137	5.21464	3.94695	P	P	P	hsa_circ_0047140	circRNA	TAAAACTGTTGAATGCTCTGGGACTTGAAGTTGGACGGAGGAAGACAATCAACTGGTGCA	NA	NA	NA	NA	NA	NA	NA	NA	NA	NA	NA	---	NA	NA	hsa_circ_0047140	chr18	20814571	20840434	+	25863	3917	NM_001100619	CABLES1
hsa_circ_0091567	0.000618249	4.24113	6.18799	6.00003	6.16442	P	P	P	4.1872	4.09552	3.79504	P	P	P	hsa_circ_0091567	circRNA	GTTTATTCAACTGAAATTCTGAACAGCAGAGTTATGGAGTATCAGAATCTTTCCATGGAA	NA	NA	NA	NA	NA	NA	NA	NA	NA	NA	NA	---	NA	NA	hsa_circ_0091567	chrX	131503342	131513705	-	10363	10363	NM_001170704	MBNL3
hsa_circ_0009194	0.000954222	4.24019	7.10933	7.17076	7.11411	P	P	P	5.18195	4.89402	5.05229	P	P	P	hsa_circ_0009194	circRNA	TCTTTCATGCTGAAAAATAAATAATAAAGCCTGTCCCGTGCCAGGACGGCAACCTTCCCA	NA	NA	NA	NA	NA	NA	NA	NA	NA	NA	NA	LOC101864832	NA	NA	hsa_circ_0009194	chr1	871151	879961	+	8810	2169	NM_152486	SAMD11
hsa_circ_0091330	0.000922744	4.24009	6.46225	6.53928	6.49078	P	P	P	4.3931	4.5646	4.26794	P	P	P	hsa_circ_0091330	circRNA	GGAAAGTAAACTTAAGGCGTACTTTATTGTCGGCTTCCAAAGATTACTAACTTTTATCTG	NA	NA	NA	NA	NA	NA	NA	NA	NA	NA	NA	---	NA	NA	hsa_circ_0091330	chrX	108924494	108926895	-	2401	819	NM_022977	ACSL4
hsa_circ_0064417	0.000484918	4.23203	5.54307	5.54279	5.91679	P	P	P	3.77713	3.67786	3.29278	P	P	P	hsa_circ_0064417	circRNA	TCTGTCCATTCTATCCCCAGAAGTAGCCCTGAAGGGTCTTACAGGAGAGGGGACCGTCCT	NA	NA	NA	NA	NA	NA	NA	NA	NA	NA	NA	---	NA	NA	hsa_circ_0064417	chr3	13611814	13613161	+	1347	1347	NM_001165035	FBLN2
hsa_circ_0039203	0.041274	4.22995	2.90058	4.4456	4.41604	P	P	P	1.04975	1.73276	2.71586	A	A	P	hsa_circ_0039203	circRNA	GGCTTTTCGATATAAAGAGAATTCTAAAGTGATTGTTTTGACTGGCATATTGGAGCAAGT	NA	NA	NA	NA	NA	NA	NA	NA	NA	NA	NA	ubxn1-a	NA	NA	hsa_circ_0039203	chr16	46702841	46711310	-	8469	927	NM_018206	VPS35
hsa_circ_0042511	0.00394357	4.2295	4.45276	3.95178	3.74386	P	P	P	2.42216	1.51355	1.92178	A	A	A	hsa_circ_0042511	circRNA	TGGAAGTCAGCTGAGCGTGAGAACCAGCTAAAGCTGTCCCACGACTGGCTGTGCTATCTG	NA	NA	NA	NA	NA	NA	NA	NA	NA	NA	NA	---	NA	NA	hsa_circ_0042511	chr17	25937092	25944454	+	7362	402	NM_014238	KSR1
hsa_circ_0018249	0.00730029	4.22081	2.90503	3.48801	3.39678	P	P	P	1.7455	0.786369	0.88787	A	A	A	hsa_circ_0018249	circRNA	ATTGAATCCCTTTTTGATCATATCTACACCACGCAAAGTGATGTATGTGGCCGAGGAGGC	NA	NA	NA	NA	NA	NA	NA	NA	NA	NA	NA	igf2bp3	NA	NA	hsa_circ_0018249	chr10	43607546	43617464	+	9918	1279	NM_020975	RET
hsa_circ_0030574	2.76885e-05	4.21903	9.47699	9.25262	9.38644	P	P	P	7.15589	7.37998	7.34819	P	P	P	hsa_circ_0030574	circRNA	TTATTGATGAAGCGACGGCAAATGTGGATCCAAGACATTGCTACAAGTGGTTGGTGTGGT	NA	NA	NA	NA	NA	NA	NA	NA	NA	NA	NA	---	NA	NA	hsa_circ_0030574	chr13	95696519	95735544	-	39025	1094	NM_005845	ABCC4
hsa_circ_0046932	8.8238e-05	4.21293	6.62003	6.89756	6.61359	P	P	P	4.52862	4.59726	4.78687	P	P	P	hsa_circ_0046932	circRNA	TCCTCTTACATTATCTGGGTTTCTGTGAAAGAGCTTAAAGGGAGCTGATGCTGGCAATGG	NA	NA	NA	NA	NA	NA	NA	NA	NA	NA	NA	cox17	NA	NA	hsa_circ_0046932	chr18	10770145	10871413	-	101268	2542	NM_022068	PIEZO2
hsa_circ_0055001	0.00129023	4.21191	7.33244	7.34011	7.24392	P	P	P	5.0307	5.39325	5.24821	P	P	P	hsa_circ_0055001	circRNA	AGTGAGCAAGCCCTCTTGGAACAGAGATCATGATGACACGGCATCTACTCGTTCAGGAGG	NA	NA	NA	NA	NA	NA	NA	NA	NA	NA	NA	---	NA	NA	hsa_circ_0055001	chr2	66691240	66691352	+	112	112	NM_002398	MEIS1
hsa_circ_0025413	0.00112475	4.20681	5.53787	4.9626	5.02181	P	P	P	2.99668	2.93277	3.40067	P	P	P	hsa_circ_0025413	circRNA	CCTTGATAAGTGAAGGGCCATTTTTCCATCTCAATCCCTGTGAAGTCAGACATTGCTCCT	NA	NA	NA	NA	NA	NA	NA	NA	NA	NA	NA	---	NA	NA	hsa_circ_0025413	chr12	9222340	9252119	-	29779	2705	NM_000014	A2M
hsa_circ_0087325	0.000382848	4.20621	5.91402	5.89262	5.49166	P	P	P	3.70609	3.88797	3.49838	P	P	P	hsa_circ_0087325	circRNA	ACTTAGTTGTGGATGTGTCTAATGAGCAGCAGCAGTTGCAAGCTCAGCATCTTTCTCATG	NA	NA	NA	NA	NA	NA	NA	NA	NA	NA	NA	Ret	NA	NA	hsa_circ_0087325	chr9	84231560	84249216	-	17656	393	NM_005077	TLE1
hsa_circ_0077885	6.57818e-05	4.19841	7.21492	7.05945	7.0888	P	P	P	4.9134	5.06633	5.16742	P	P	P	hsa_circ_0077885	circRNA	AGAAGTATGGCAAGGTCTATGGAAATGCAGGACCTAGCAAGTCCTCATACTCTTGTTGGA	NA	NA	NA	NA	NA	NA	NA	NA	NA	NA	NA	---	NA	NA	hsa_circ_0077885	chr6	133767767	133804253	+	36486	1108	NM_004100	EYA4
hsa_circ_0079540	0.00153097	4.19202	7.36068	7.44732	7.44775	P	P	P	5.22729	5.55917	5.24324	P	P	P	hsa_circ_0079540	circRNA	TGTCTGTGAAGATTTCATTTCAGGTGGATCAAGAAGTGAACGTTGTGATATTGTTTCCAA	NA	NA	NA	NA	NA	NA	NA	NA	NA	NA	NA	---	NA	NA	hsa_circ_0079540	chr7	20406634	20420454	+	13820	588	NM_002214	ITGB8
hsa_circ_0079588	9.47085e-05	4.19125	5.71566	5.44417	5.43042	P	P	P	3.63728	3.32162	3.42948	P	P	P	hsa_circ_0079588	circRNA	TCAGTTCAAGCTTCAAGCACATTTAATTCCTGGATTAAATCTGAACGCCTTGGGTCTGTT	NA	NA	NA	NA	NA	NA	NA	NA	NA	NA	NA	---	NA	NA	hsa_circ_0079588	chr7	23357257	23381808	-	24551	318	NM_006547	IGF2BP3
hsa_circ_0037392	0.00112324	4.18983	5.86385	6.30333	6.05424	P	P	P	4.08547	4.25251	3.65215	P	P	P	hsa_circ_0037392	circRNA	TTCTTTACAATAAAGACTGTAACTGAGCTGACTGTGAGTGTTCTCCATCGCCGTCTTCGG	NA	NA	NA	NA	NA	NA	NA	NA	NA	NA	NA	PHKA2	NA	NA	hsa_circ_0037392	chr16	2041974	2044276	+	2302	1794	NM_004209	SYNGR3
hsa_circ_0074949	0.0296133	4.1859	3.38459	3.04198	3.32267	P	P	P	0.668416	1.90704	0.597524	A	A	A	hsa_circ_0074949	circRNA	ACTCTACACGATGGATTCCATGACTTAGTTGTCCTCAAGAATGCAATTTGCGTGGGAGCA	NA	NA	NA	NA	NA	NA	NA	NA	NA	NA	NA	---	NA	NA	hsa_circ_0074949	chr5	169135172	169139227	+	4055	276	NM_004946	DOCK2
hsa_circ_0059224	0.00866601	4.1815	3.18068	4.08845	4.11531	P	P	P	1.24773	2.28603	1.64603	A	A	A	hsa_circ_0059224	circRNA	CTGTCACCAATAAAGGCATGGAAGAACTACCTTGAGGATGTTCTGGAAGAGCTGACATAT	NA	NA	NA	NA	NA	NA	NA	NA	NA	NA	NA	---	NA	NA	hsa_circ_0059224	chr20	2815970	2819575	-	3605	1145	NM_022760	FAM113A
hsa_circ_0078042	0.000541376	4.17266	5.71493	5.52608	5.70473	P	P	P	3.61672	3.57988	3.57357	P	P	P	hsa_circ_0078042	circRNA	TTCCAAGCAATAATGAATCGTATTTCCAGTGTGGGGATGTGCCAACTGCCGAGTGGTTTT	NA	NA	NA	NA	NA	NA	NA	NA	NA	NA	NA	---	NA	NA	hsa_circ_0078042	chr6	142688705	142725110	+	36405	2024	NM_020455	GPR126
hsa_circ_0079582	0.000636447	4.16629	4.93119	5.33864	4.90754	P	P	P	3.20623	3.09535	2.69234	P	P	P	hsa_circ_0079582	circRNA	TTTAGGTGCAATTGCAGGAATTGACGCTGTATAATCCAGAACGCACTATTACAGTTAAAG	NA	NA	NA	NA	NA	NA	NA	NA	NA	NA	NA	---	NA	NA	hsa_circ_0079582	chr7	23349827	23383472	-	33645	2952	NM_006547	IGF2BP3
hsa_circ_0074959	0.0056477	4.16218	6.03773	5.82884	5.97203	P	P	P	3.51104	4.21221	3.86649	P	P	P	hsa_circ_0074959	circRNA	ACCATCCCAGAATGCCGGGACATTCTGCTTCCTGTCATCACCAAAGAGCTGAAGGAGCTG	NA	NA	NA	NA	NA	NA	NA	NA	NA	NA	NA	---	NA	NA	hsa_circ_0074959	chr5	169230061	169507287	+	277226	2733	NM_004946	DOCK2
hsa_circ_0073790	0.000848096	4.1613	7.24978	7.03902	7.00912	P	P	P	5.07022	5.05473	5.01337	P	P	P	hsa_circ_0073790	circRNA	TGAAGGCTTCAGACCTAACCCCATCACAATCATTTTAGAAGCTGAATATTACACCCTGTG	NA	NA	NA	NA	NA	NA	NA	NA	NA	NA	NA	---	NA	NA	hsa_circ_0073790	chr5	127647576	127647645	-	69	69	NM_001999	FBN2
hsa_circ_0072016	0.0232934	4.15978	5.3172	6.26203	6.27105	P	P	P	3.99013	3.89115	3.98834	P	P	P	hsa_circ_0072016	circRNA	CACGCCTCTCAATGTTCAACAGAAGAATTTTATTTATCTACGCCAGAAAACTACCACTAC	NA	NA	NA	NA	NA	NA	NA	NA	NA	NA	NA	---	NA	NA	hsa_circ_0072016	chr5	16766188	16779757	-	13569	353	NM_012334	MYO10
hsa_circ_0032973	0.00331419	4.15946	10.0187	9.53671	9.71783	P	P	P	7.68477	7.7776	7.68109	P	P	P	hsa_circ_0032973	circRNA	TCATTGCAGTGATGTGAACGAGTGTGCCACCGAGAACCCCTGCGTGCAAACCTGCGTCAA	NA	NA	NA	NA	NA	NA	NA	NA	NA	NA	NA	---	NA	NA	hsa_circ_0032973	chr14	92353536	92353656	-	120	120	NM_006329	FBLN5
hsa_circ_0009024	1.48808e-05	4.15665	6.79257	6.75827	6.60931	P	P	P	4.64909	4.57091	4.77314	P	P	P	hsa_circ_0009024	circRNA	AAAGTCTTAGTTTGTGAATAGCACAATGGAAGAAGCTGGACTTTGTGGGTTAAGAGAGAA	NA	NA	NA	NA	NA	NA	NA	NA	NA	NA	NA	Spata9	NA	NA	hsa_circ_0009024	chrY	21749095	21749393	+	298	298	NR_045128	TXLNG2P
hsa_circ_0060837	0.00097995	4.15397	5.49276	5.33583	5.59824	P	P	P	3.3995	3.66504	3.16787	P	P	P	hsa_circ_0060837	circRNA	AAGAGGAGAAGGCCTTCATCCCCACGCTGCATGAGAACCTGGACATCAAGGTGCTCATGC	NA	NA	NA	NA	NA	NA	NA	NA	NA	NA	NA	---	NA	NA	hsa_circ_0060837	chr20	49225149	49225275	-	126	126	NM_080829	FAM65C
hsa_circ_0022385	0.000551782	4.15392	9.64911	9.28852	9.67996	P	P	P	7.50398	7.61024	7.36101	P	P	P	hsa_circ_0022385	circRNA	CCACTTAAAGGCCCAAGCTGGATGGCTGCAACATGATTATGGCCACCTGTCTGTCTACAG	NA	NA	NA	NA	NA	NA	NA	NA	NA	NA	NA	---	NA	NA	hsa_circ_0022385	chr11	61608095	61608197	+	102	102	NM_004265	FADS2
hsa_circ_0068530	1.68425e-06	4.14973	6.43173	6.4728	6.5474	P	P	P	4.37917	4.42191	4.49194	P	P	P	hsa_circ_0068530	circRNA	CGGGTAGGGGCGTCATCAAAGCCTATTATGGAGAAAAGACGAAGAGCAAGAATAAATGAA	NA	NA	NA	NA	NA	NA	NA	NA	NA	NA	NA	---	NA	NA	hsa_circ_0068530	chr3	193854405	193855073	+	668	420	NM_005524	HES1
hsa_circ_0046935	2.38733e-05	4.14929	5.84591	5.93253	5.91594	P	P	P	3.87459	3.90519	3.75302	P	P	P	hsa_circ_0046935	circRNA	ACCATCTGATGTTGTTTGGTATCAAGTCAGTAATTCAAACGGACTGTTCAAGTACTTGGA	NA	NA	NA	NA	NA	NA	NA	NA	NA	NA	NA	Cox20	NA	NA	hsa_circ_0046935	chr18	10801387	10807272	-	5885	322	NM_022068	PIEZO2
hsa_circ_0012910	0.000238047	4.14246	3.74392	3.67501	4.05885	P	P	P	1.59637	1.87166	1.87088	A	A	A	hsa_circ_0012910	circRNA	ATTCCTTTGTAACTGCATACAGAGACTAATCCAGAATGGTGGCCACAGTGGCAGTTCTCT	NA	NA	NA	NA	NA	NA	NA	NA	NA	NA	NA	Mir466j	NA	NA	hsa_circ_0012910	chr1	67465014	67518540	-	53526	5839	NM_015139	SLC35D1
hsa_circ_0023764	0.0393918	4.1385	4.74271	6.26648	6.12869	P	P	P	4.22874	3.48891	3.58526	P	P	P	hsa_circ_0023764	circRNA	AGGAACTGCTTAGATATGATATTCATTTTCAGTACAATGGCTTTTTATTTGGATTAATGC	NA	NA	NA	NA	NA	NA	NA	NA	NA	NA	NA	---	NA	NA	hsa_circ_0023764	chr11	77811987	77830295	-	18308	1200	NM_001007027	ALG8
hsa_circ_0003461	0.0468914	4.13794	2.54236	3.9474	4.07682	P	P	P	1.57753	1.3092	1.90749	A	A	A	hsa_circ_0003461	circRNA	CTGAGATCTCCACTACAAGATTAAGGAAACCACGCAGATAGAAGATCCAAGAAAACAATG	NA	NA	NA	NA	NA	NA	NA	NA	NA	NA	NA	Zbtb44	NA	NA	hsa_circ_0003461	chr4	184129105	184130178	+	1073	281	NM_024949	WWC2
hsa_circ_0073787	1.67541e-05	4.13417	7.74251	7.72966	7.87161	P	P	P	5.62958	5.83114	5.73754	P	P	P	hsa_circ_0073787	circRNA	CTTTCACCCAATGGGGCCTGTGTAGATATTGATGAATGTATGATAATGAACGGAGGCTGT	NA	NA	NA	NA	NA	NA	NA	NA	NA	NA	NA	---	NA	NA	hsa_circ_0073787	chr5	127641202	127671269	-	30067	1950	NM_001999	FBN2
hsa_circ_0015501	0.00417084	4.13194	11.7309	11.2904	11.6204	P	P	P	9.51558	9.5172	9.50388	P	P	P	hsa_circ_0015501	circRNA	TGGCAGATCGGCTCATGGAATCCAGGTCCTTCTATACCGCTTACCTGCAGAGACTCTCTG	NA	NA	NA	NA	NA	NA	NA	NA	NA	NA	NA	Gm933	NA	NA	hsa_circ_0015501	chr1	180153050	180153185	+	135	135	NM_002826	QSOX1
hsa_circ_0049229	0.00674249	4.12499	9.32623	10.0292	9.98389	P	P	P	7.89555	7.78585	7.61189	P	P	P	hsa_circ_0049229	circRNA	AGACCTAGGCTAATAAACGGTTCAATTTCTGTTCGGCCGCCCTGGGGACGCAGACGCCAA	NA	NA	NA	NA	NA	NA	NA	NA	NA	NA	NA	LOC100784958	NA	NA	hsa_circ_0049229	chr19	10332108	10341948	-	9840	3584	NM_004230	S1PR2
hsa_circ_0078969	0.00187051	4.1156	11.381	11.846	11.6022	P	P	P	9.55174	9.51449	9.67236	P	P	P	hsa_circ_0078969	circRNA	ATGTTCTGTGAACACAAATAAAATTGATTTACTGTCTGCAGTCCGGCGCCAGCTGCCAGT	NA	NA	NA	NA	NA	NA	NA	NA	NA	NA	NA	AFP	NA	NA	hsa_circ_0078969	chr6_qbl_hap6	2003904	2004902	-	998	998	---	---
hsa_circ_0085022	0.00849691	4.11157	6.15661	5.91491	6.04649	P	P	P	4.36644	3.98281	3.54389	P	P	P	hsa_circ_0085022	circRNA	CGCTGCCGAAGGAAAGATGTCTGCCAAGCTATAGACCATGGCTGTGAACACATTTGTGTG	NA	NA	NA	NA	NA	NA	NA	NA	NA	NA	NA	---	NA	NA	hsa_circ_0085022	chr8	99030221	99030344	+	123	123	NM_002380	MATN2
hsa_circ_0079537	0.000208088	4.10221	5.27687	4.89939	4.98697	P	P	P	3.12322	2.84069	3.10094	P	P	P	hsa_circ_0079537	circRNA	AATCGACAACCATGAAGACAATAGATGTGCATCTTCAAATGCAGCATCCTGTGCCAGGTG	NA	NA	NA	NA	NA	NA	NA	NA	NA	NA	NA	---	NA	NA	hsa_circ_0079537	chr7	20403259	20421508	+	18249	833	NM_002214	ITGB8
hsa_circ_0077889	3.04618e-05	4.09273	7.62828	7.52826	7.38636	P	P	P	5.35862	5.5056	5.58089	P	P	P	hsa_circ_0077889	circRNA	TATTCTTACCAAATGCCAGATTTGGGTGTGATGTTGCCAGCCATCAAGACAGAGAGTGGA	NA	NA	NA	NA	NA	NA	NA	NA	NA	NA	NA	---	NA	NA	hsa_circ_0077889	chr6	133783758	133783902	+	144	144	NM_004100	EYA4
hsa_circ_0063387	0.000165165	4.09228	4.67444	4.75732	5.00424	P	P	P	2.99097	2.63795	2.7042	P	P	P	hsa_circ_0063387	circRNA	TAATAAAGTGAAGACTCAGAACCCACCAGCGATTGCAACTGTTCTCCATAGTGGTGTTCG	NA	NA	NA	NA	NA	NA	NA	NA	NA	NA	NA	Phf8	NA	NA	hsa_circ_0063387	chr22	39770320	39781593	+	11273	4277	NM_004711	SYNGR1
hsa_circ_0046945	0.000200914	4.08629	7.65913	7.34585	7.29558	P	P	P	5.466	5.53065	5.22089	P	P	P	hsa_circ_0046945	circRNA	GGGGAGACAGGTTCATTGCAGAAGAGGCCGCGGCTTCTGGGGCCAAGTGTGTGCTCACCC	NA	NA	NA	NA	NA	NA	NA	NA	NA	NA	NA	---	NA	NA	hsa_circ_0046945	chr18	12009881	12014372	+	4491	260	NM_014214	IMPA2
hsa_circ_0012574	0.0116227	4.08399	3.37133	3.12029	3.73949	P	P	P	1.87188	0.709603	1.39952	A	A	A	hsa_circ_0012574	circRNA	CTCCTTAACCAATTCCAGGATTCTTGTGGATGTTCCATTTGACAGTTACAGAAGAATTGT	NA	NA	NA	NA	NA	NA	NA	NA	NA	NA	NA	---	NA	NA	hsa_circ_0012574	chr1	53332174	53332239	+	65	65	NM_001004339	ZYG11A
hsa_circ_0025756	6.24993e-05	4.07651	8.4235	8.24827	8.45079	P	P	P	6.34854	6.41266	6.28478	P	P	P	hsa_circ_0025756	circRNA	TGTCAGCCATCTATAGCAAGCAGGAGAACCACGACAAGGAGCAATGGGGCCCTCTGTCCA	NA	NA	NA	NA	NA	NA	NA	NA	NA	NA	NA	rsl24d1	NA	NA	hsa_circ_0025756	chr12	29669281	29904805	-	235524	1576	NM_175861	TMTC1
hsa_circ_0073789	7.32324e-05	4.07282	7.40123	7.32474	7.26931	P	P	P	5.2623	5.21544	5.43328	P	P	P	hsa_circ_0073789	circRNA	ATATTCCTGGATTCACCTTTGACATTCACACAGGAAAAGCTGTTGACAGCCTGAAGGGGA	NA	NA	NA	NA	NA	NA	NA	NA	NA	NA	NA	---	NA	NA	hsa_circ_0073789	chr5	127642826	127686697	-	43871	2748	NM_001999	FBN2
hsa_circ_0030570	0.00422317	4.07087	9.61432	9.23781	9.06809	P	P	P	7.31733	7.21893	7.35956	P	P	P	hsa_circ_0030570	circRNA	AGCAAAACAGGCATCAGAGACCCCAACTCTACAAGGCCTTTCCTTTACTGTCAGACCTGG	NA	NA	NA	NA	NA	NA	NA	NA	NA	NA	NA	---	NA	NA	hsa_circ_0030570	chr13	95686858	95840796	-	153938	2607	NM_005845	ABCC4
hsa_circ_0024590	8.52395e-06	4.06816	11.9721	11.8911	12.0624	P	P	P	9.99203	9.99169	9.87055	P	P	P	hsa_circ_0024590	circRNA	TTTCTCAGAGATCACTCAATAAACCTAAGAACCCTCCCTGTGGAGGCCTCCTCTCTGGCC	NA	NA	NA	NA	NA	NA	NA	NA	NA	NA	NA	---	NA	NA	hsa_circ_0024590	chr11	119209651	119216343	-	6692	3330	NM_031433	MFRP
hsa_circ_0049237	0.00032842	4.06499	9.38591	9.4324	9.55771	P	P	P	7.56809	7.48184	7.24246	P	P	P	hsa_circ_0049237	circRNA	ATTGCCCAGACTTCCTTTGTGTTAGTTAATAAAGCTTTCTCAACTGCCTCCTGCCAGCGA	NA	NA	NA	NA	NA	NA	NA	NA	NA	NA	NA	---	NA	NA	hsa_circ_0049237	chr19	10394708	10397291	+	2583	2290	NM_000201	ICAM1
hsa_circ_0069724	0.00214996	4.05831	7.89317	7.97798	7.89047	P	P	P	5.6637	5.94886	6.0598	P	P	P	hsa_circ_0069724	circRNA	ACTGTGGCAGGTTAGTAGCAAAGATGAAGATTTTCTTGACCTTTCTGTTGATGTGGAGCA	NA	NA	NA	NA	NA	NA	NA	NA	NA	NA	NA	Tp53i11	NA	NA	hsa_circ_0069724	chr4	53468022	53476783	-	8761	359	NM_001134223	USP46
hsa_circ_0015502	0.000934522	4.049	11.4341	11.0704	11.3001	P	P	P	9.18887	9.25349	9.32931	P	P	P	hsa_circ_0015502	circRNA	TTTTTGTTAAGGCAAGCTCATGGAATCCAGGTCCTTCTATACCGCTTACCTGCAGAGACT	NA	NA	NA	NA	NA	NA	NA	NA	NA	NA	NA	Gm960	NA	NA	hsa_circ_0015502	chr1	180153050	180167169	+	14119	2489	NM_002826	QSOX1
hsa_circ_0072492	0.000115307	4.04781	9.20363	8.9821	9.08297	P	P	P	7.07776	7.12813	7.01782	P	P	P	hsa_circ_0072492	circRNA	TTAAGGAAGGCAGCTGGATTGCCTTTTGCAATTCTTACTTCAAGGCATACCCCCTTCCAA	NA	NA	NA	NA	NA	NA	NA	NA	NA	NA	NA	Dusp22	NA	NA	hsa_circ_0072492	chr5	54763696	54771278	-	7582	433	NM_003711	PPAP2A
hsa_circ_0091329	3.7394e-05	4.0465	9.72149	9.48687	9.68746	P	P	P	7.49906	7.64035	7.70944	P	P	P	hsa_circ_0091329	circRNA	CTTCCTATCTGATTACCAGTGTTGAACTTCTGGAAAGTAAACTTAAGTTAATTCTTGGGA	NA	NA	NA	NA	NA	NA	NA	NA	NA	NA	NA	---	NA	NA	hsa_circ_0091329	chrX	108924494	108926125	-	1631	288	NM_022977	ACSL4
hsa_circ_0032972	0.00233068	4.04576	9.49879	9.11091	9.25408	P	P	P	7.29937	7.30581	7.23524	P	P	P	hsa_circ_0032972	circRNA	TCAGTGATAAATGTGGACGAGTGTGCAACAGATTCCCACCAGTGCAACCCCACCCAGATC	NA	NA	NA	NA	NA	NA	NA	NA	NA	NA	NA	---	NA	NA	hsa_circ_0032972	chr14	92347635	92361416	-	13781	610	NM_006329	FBLN5
hsa_circ_0025425	0.0109588	4.04372	4.54149	4.45386	4.61365	P	P	P	2.08521	2.4534	2.90928	A	P	P	hsa_circ_0025425	circRNA	ACAACATTCAACTCCCTACTTTGTCCATCAGAGTCAGATGTAATGGGAAGAGGCCATGCA	NA	NA	NA	NA	NA	NA	NA	NA	NA	NA	NA	---	NA	NA	hsa_circ_0025425	chr12	9241795	9246175	-	4380	645	NM_000014	A2M
hsa_circ_0069728	0.000981138	4.03072	11.5218	11.9006	12.0627	P	P	P	9.96751	9.99942	9.48097	P	P	P	hsa_circ_0069728	circRNA	CTGGCAGGTTAATAAACTTACTTGGCCTGACGGCTGACGCGCCACTATGTAGCGGGTTTC	NA	NA	NA	NA	NA	NA	NA	NA	NA	NA	NA	nav2	NA	NA	hsa_circ_0069728	chr4	53578990	53580305	+	1315	781	NR_024031	SNHG13
hsa_circ_0030568	0.001425	4.02592	8.37414	7.86724	8.06438	P	P	P	6.16666	5.96193	6.18451	P	P	P	hsa_circ_0030568	circRNA	AGCAAAACAGAGGCTTGGTTCTTGTTTTTGACAACGTCCCGCTGGTTTGCCGTCCGTCTG	NA	NA	NA	NA	NA	NA	NA	NA	NA	NA	NA	---	NA	NA	hsa_circ_0030568	chr13	95686858	95726578	-	39720	1064	NM_005845	ABCC4
hsa_circ_0042509	0.0332834	4.02451	3.73726	3.52753	3.36133	P	P	P	0.557445	1.89996	1.81924	A	A	A	hsa_circ_0042509	circRNA	ACACTTCTGGAAGTCAGCTGACTTCTGCAAGGGGCGGACGTTGCACTCGTTTGTGAGGGA	NA	NA	NA	NA	NA	NA	NA	NA	NA	NA	NA	---	NA	NA	hsa_circ_0042509	chr17	25934939	25944454	+	9515	633	NM_014238	KSR1
hsa_circ_0085494	0.0407709	4.02389	4.86296	6.17923	6.24816	P	P	P	3.69757	4.16187	3.72869	P	P	P	hsa_circ_0085494	circRNA	AACACGTCTTAGTACACATTTGGGAACCCATATTGAAATGTCTATTGGAATTATTTTGGG	NA	NA	NA	NA	NA	NA	NA	NA	NA	NA	NA	rps26	NA	NA	hsa_circ_0085494	chr8	125332326	125335616	-	3290	204	NM_194291	TMEM65
hsa_circ_0087334	0.00314457	4.02054	5.93074	5.83323	5.88983	P	P	P	3.98371	3.59991	4.01392	P	P	P	hsa_circ_0087334	circRNA	CATCATCGGGACTGAAATCGCCAAGAGATTGAATACGATTTGTGCACAAGTCATCCCATT	NA	NA	NA	NA	NA	NA	NA	NA	NA	NA	NA	Rev3l	NA	NA	hsa_circ_0087334	chr9	84267128	84268951	-	1823	138	NM_005077	TLE1
hsa_circ_0073776	0.000470476	4.01817	7.72032	7.25821	7.47596	P	P	P	5.298	5.57359	5.58264	P	P	P	hsa_circ_0073776	circRNA	TTTTGGGGTAATGAAAATGAATGCAGGACCAAGCCAGGAATCTGTGAAAATGGACGTTGT	NA	NA	NA	NA	NA	NA	NA	NA	NA	NA	NA	---	NA	NA	hsa_circ_0073776	chr5	127593600	127616009	-	22409	3273	NM_001999	FBN2
hsa_circ_0074957	0.000102477	4.0129	5.929	5.67184	5.70689	P	P	P	3.66444	3.81573	3.82189	P	P	P	hsa_circ_0074957	circRNA	GTATGAGAAGAATGCCGGGACATTCTGCTTCCTGTCATCACCAAAGAGCTGAAGGAGCTG	NA	NA	NA	NA	NA	NA	NA	NA	NA	NA	NA	---	NA	NA	hsa_circ_0074957	chr5	169230061	169494690	+	264629	2090	NM_004946	DOCK2
hsa_circ_0046923	1.39171e-05	4.01254	5.50512	5.32605	5.383	P	P	P	3.3119	3.50607	3.38175	P	P	P	hsa_circ_0046923	circRNA	CATGCTTCCACCAAATGAAAATCAAACAAACATCCCCTTTAATGAGTTGAACAAGTCTCT	NA	NA	NA	NA	NA	NA	NA	NA	NA	NA	NA	cox10	NA	NA	hsa_circ_0046923	chr18	10741028	10762623	-	21595	1585	NM_022068	PIEZO2
hsa_circ_0046747	0.0353895	4.00548	4.0731	3.81454	3.89821	P	P	P	1.35215	2.65833	1.36248	A	P	A	hsa_circ_0046747	circRNA	CCATCAGCAAGTATCGAGTGAACTTCAGACCTAGATATGTCACTAGGTATAAGACAGTGA	NA	NA	NA	NA	NA	NA	NA	NA	NA	NA	NA	---	NA	NA	hsa_circ_0046747	chr18	2884961	2892484	+	7523	2102	NM_032048	EMILIN2
hsa_circ_0079604	0.0132186	3.99707	3.80641	3.61467	3.57547	P	P	P	1.40332	1.27957	2.16179	A	A	A	hsa_circ_0079604	circRNA	CATCGAGGCGCTTTCAGAAGACTTAGGAAGACTGGTGGATGCGTTTGGGTTGTAGCTAGG	NA	NA	NA	NA	NA	NA	NA	NA	NA	NA	NA	---	NA	NA	hsa_circ_0079604	chr7	23509554	23509995	-	441	441	NM_006547	IGF2BP3
hsa_circ_0073780	0.000185852	3.99034	8.09088	7.78316	7.83964	P	P	P	5.85899	5.84557	6.03101	P	P	P	hsa_circ_0073780	circRNA	TTGGCTACACCACAGACATCAGTGGAACCTCTTGTATAGCTGAATATTACACCCTGTGTC	NA	NA	NA	NA	NA	NA	NA	NA	NA	NA	NA	---	NA	NA	hsa_circ_0073780	chr5	127613571	127647645	-	34074	2592	NM_001999	FBN2
hsa_circ_0024585	6.73114e-05	3.97453	12.1117	11.9897	12.0813	P	P	P	10.0722	10.1761	9.95648	P	P	P	hsa_circ_0024585	circRNA	TTCTCAGAGATCACTCAATAAACCTAAGAACCCTCACTGCGAGAGGACCCCGGCGTCCGG	NA	NA	NA	NA	NA	NA	NA	NA	NA	NA	NA	---	NA	NA	hsa_circ_0024585	chr11	119209651	119211150	-	1499	1164	NM_015645	C1QTNF5
hsa_circ_0092134	0.0023122	3.97275	3.85727	4.53054	4.23096	P	P	P	2.16854	2.45682	2.07261	A	A	A	hsa_circ_0092134	circRNA	TGTTTCTGTAGAAAATAAAGCTGAGCTACGATTCCGGCACATCACGATGCCTTTCTCGTC	NA	NA	NA	NA	NA	NA	NA	NA	NA	NA	NA	---	NA	NA	hsa_circ_0092134	chrX	153880245	153880905	-	660	660	NM_020994	CTAG2
hsa_circ_0046917	0.00182543	3.96603	4.93779	5.13606	5.23974	P	P	P	2.79042	3.37386	3.14351	P	P	P	hsa_circ_0046917	circRNA	CAATTTTGAAGGCTGAAGGAGAAAAAATTGATTCAGAAGAGGCACTGATCTATGAAGAGG	NA	NA	NA	NA	NA	NA	NA	NA	NA	NA	NA	CORO7	NA	NA	hsa_circ_0046917	chr18	10701986	10857209	-	155223	5610	NM_022068	PIEZO2
hsa_circ_0066517	0.00207541	3.96522	6.73516	6.56309	6.95169	P	P	P	4.82434	4.74897	4.7393	P	P	P	hsa_circ_0066517	circRNA	CAGAATACAGTTGCCTGTCTCGGGAAACTTGATTGATCTTTATGGAAACCAAGGTCTGCC	NA	NA	NA	NA	NA	NA	NA	NA	NA	NA	NA	---	NA	NA	hsa_circ_0066517	chr3	69998201	70008571	+	10370	417	NM_000248	MITF
hsa_circ_0065431	0.00418578	3.95812	3.63367	3.02939	3.54252	P	P	P	0.945927	1.41533	1.82734	A	A	A	hsa_circ_0065431	circRNA	TGACATGCCCTACATGGACCCAAGTGGGAACAACCTGGGTGGGCCCACACAGCAGCAGGA	NA	NA	NA	NA	NA	NA	NA	NA	NA	NA	NA	---	NA	NA	hsa_circ_0065431	chr3	48623995	48629681	-	5686	2310	NM_000094	COL7A1
hsa_circ_0087331	0.000510725	3.95568	4.77039	4.32066	4.70803	P	P	P	2.60212	2.8508	2.39853	P	P	A	hsa_circ_0087331	circRNA	ACCTCCTACACCTTAAATTGGAATGTGAGAAACTGGCAAGTGAAAAGACAGAAATGCAGA	NA	NA	NA	NA	NA	NA	NA	NA	NA	NA	NA	rev1	NA	NA	hsa_circ_0087331	chr9	84267098	84300811	-	33713	277	NM_005077	TLE1
hsa_circ_0070280	0.000785878	3.94879	4.26947	3.92984	3.96023	P	P	P	2.3291	1.79525	2.0668	A	A	A	hsa_circ_0070280	circRNA	ATCATAACAAGTATTATCCAAAGAGATGAGTCACCCATGGAAAAAGGGCTCTCTGGTCTA	NA	NA	NA	NA	NA	NA	NA	NA	NA	NA	NA	---	NA	NA	hsa_circ_0070280	chr4	84502714	84509452	+	6738	436	NM_032717	AGPAT9
hsa_circ_0030410	0.000903444	3.93945	4.81907	5.25084	5.35871	P	P	P	3.00036	3.07012	3.43917	P	P	P	hsa_circ_0030410	circRNA	AAATAAAAAGTGCCTAAAAGAGTTGCACAAAAGTTTATACCAAGTCTTCTCATTTAAAAG	NA	NA	NA	NA	NA	NA	NA	NA	NA	NA	NA	---	NA	NA	hsa_circ_0030410	chr13	73637961	73651676	+	13715	1891	NM_001730	KLF5
hsa_circ_0070724	0.00135109	3.93876	7.54257	7.43128	7.28388	P	P	P	5.43334	5.45285	5.44986	P	P	P	hsa_circ_0070724	circRNA	AATTTTCCACCTTGTAGACGAGCCTATTCAAGAACACTACAACAAGCAGCCATTCCCTTA	NA	NA	NA	NA	NA	NA	NA	NA	NA	NA	NA	Fbn1	NA	NA	hsa_circ_0070724	chr4	119201192	119203398	-	2206	2206	NM_003619	PRSS12
hsa_circ_0054993	0.00599893	3.93813	4.54893	5.39683	5.30974	P	P	P	2.66914	3.11308	3.54858	P	P	P	hsa_circ_0054993	circRNA	GACGCTTTAAAGAGAGATAAAGATGCCATTTATGGTACGACGATCTACCCCATTACGGGG	NA	NA	NA	NA	NA	NA	NA	NA	NA	NA	NA	---	NA	NA	hsa_circ_0054993	chr2	66664868	66665095	+	227	227	NM_002398	MEIS1
hsa_circ_0084862	0.0246132	3.93466	4.3229	5.53945	5.3849	P	P	P	3.03113	3.00551	3.50098	P	P	P	hsa_circ_0084862	circRNA	AGACATCTTTCCATTGTTGATCAGAAACTATAGTGACACTGAAACTGAAGGAGAGATTTT	NA	NA	NA	NA	NA	NA	NA	NA	NA	NA	NA	bcr	NA	NA	hsa_circ_0084862	chr8	90921794	90926441	+	4647	292	NM_001126111	OSGIN2
hsa_circ_0022389	4.58714e-05	3.93362	8.54386	8.44113	8.60436	P	P	P	6.42077	6.64967	6.58645	P	P	P	hsa_circ_0022389	circRNA	ATGATCGTCCATAAGAACTGGGTGTACGGCAAGAAGAAGCTGAAATACCTGCCCTACAAT	NA	NA	NA	NA	NA	NA	NA	NA	NA	NA	NA	---	NA	NA	hsa_circ_0022389	chr11	61624482	61625002	+	520	138	NM_004265	FADS2
hsa_circ_0030594	0.00144182	3.92584	8.87768	8.52055	8.47684	P	P	P	6.34765	6.59798	6.975	P	P	P	hsa_circ_0030594	circRNA	TATTGAAAGATGCATCAGAGACCCCAACTCTACAAGGCCTTTCCTTTACTGTCAGACCTG	NA	NA	NA	NA	NA	NA	NA	NA	NA	NA	NA	---	NA	NA	hsa_circ_0030594	chr13	95822785	95840796	-	18011	561	NM_005845	ABCC4
hsa_circ_0022384	0.000761746	3.92222	8.5448	8.14832	8.44292	P	P	P	6.26596	6.7103	6.22125	P	P	P	hsa_circ_0022384	circRNA	TTCTTCCTGATCAAAGATCACTGAGGACTTCCGGGCCCTGAGGAAGACGGCTGAGGACAT	NA	NA	NA	NA	NA	NA	NA	NA	NA	NA	NA	---	NA	NA	hsa_circ_0022384	chr11	61607805	61624543	+	16738	487	NM_004265	FADS2
hsa_circ_0023369	0.00016341	3.92184	7.13537	7.02494	7.31079	P	P	P	5.22982	5.33509	4.98394	P	P	P	hsa_circ_0023369	circRNA	CACGCTGCAGCAAATTCACAGGCAATTTCTTTTACAACTACATGATGGGCATCGAGTTTA	NA	NA	NA	NA	NA	NA	NA	NA	NA	NA	NA	---	NA	NA	hsa_circ_0023369	chr11	71148857	71150129	-	1272	337	NM_001360	DHCR7
hsa_circ_0022386	0.000758682	3.92155	9.48709	9.08746	9.34988	P	P	P	7.33725	7.44616	7.24805	P	P	P	hsa_circ_0022386	circRNA	AGCCCATCGAGGCCCAAGCTGGATGGCTGCAACATGATTATGGCCACCTGTCTGTCTACA	NA	NA	NA	NA	NA	NA	NA	NA	NA	NA	NA	---	NA	NA	hsa_circ_0022386	chr11	61608095	61615756	+	7661	228	NM_004265	FADS2
hsa_circ_0087310	0.00164856	3.92096	5.899	5.93185	5.90565	P	P	P	3.91069	3.8022	4.09491	P	P	P	hsa_circ_0087310	circRNA	GTACCAATAAACTGAAATCGCCAAGAGATTGAATACGATTTGTGCACAAGTCATCCCATT	NA	NA	NA	NA	NA	NA	NA	NA	NA	NA	NA	Rere	NA	NA	hsa_circ_0087310	chr9	84198597	84268951	-	70354	2594	NM_005077	TLE1
hsa_circ_0005438	0.000301848	3.92085	5.25781	4.91558	4.89759	P	P	P	2.95676	2.9084	3.29081	P	P	P	hsa_circ_0005438	circRNA	ATTTTCTCAGGCCAAGAAAGAAGAGAGAACTCTCACCACAACATTTCAAAGGGAATACAT	NA	NA	NA	NA	NA	NA	NA	NA	NA	NA	NA	Btbd19	NA	NA	hsa_circ_0005438	chr8	81937454	81942324	-	4870	4870	NM_018440	PAG1
hsa_circ_0024591	0.000456552	3.91675	11.827	11.692	11.8633	P	P	P	9.83894	9.80559	9.83419	P	P	P	hsa_circ_0024591	circRNA	TTTTCTCAGAGATCACTCAATAAACCTAAGAACCCTCGTCGGCGTCCTCGAGGGCTACGG	NA	NA	NA	NA	NA	NA	NA	NA	NA	NA	NA	---	NA	NA	hsa_circ_0024591	chr11	119209651	119216869	-	7218	3600	NM_031433	MFRP
hsa_circ_0018453	0.0349347	3.91144	5.56599	6.49251	6.76021	P	P	P	4.39556	4.39021	4.38046	P	P	P	hsa_circ_0018453	circRNA	TCTCATAGAAAACGAGAGTATATGCGATGAGTTTGGGGAGGACGAGGAAGAAACGAACGT	NA	NA	NA	NA	NA	NA	NA	NA	NA	NA	NA	---	NA	NA	hsa_circ_0018453	chr10	63759849	63760080	+	231	231	NM_032199	ARID5B
hsa_circ_0079543	4.2164e-05	3.90689	7.19764	7.37642	7.38384	P	P	P	5.31765	5.31394	5.43267	P	P	P	hsa_circ_0079543	circRNA	CAAACTTCAGAGTCATATCGGATGGCGAAAAGAGGCTAAAAGATTGCTGCTGGTGATGAC	NA	NA	NA	NA	NA	NA	NA	NA	NA	NA	NA	---	NA	NA	hsa_circ_0079543	chr7	20421349	20445794	+	24445	1222	NM_002214	ITGB8
hsa_circ_0009420	0.000693939	3.90623	6.8974	6.53979	6.73488	P	P	P	4.84527	4.68846	4.75883	P	P	P	hsa_circ_0009420	circRNA	CCTGGAGACAGATCTCCCAGAGGCTGTGCACGGGCAAGCTGGGCATCGCCATGAAGGTGC	NA	NA	NA	NA	NA	NA	NA	NA	NA	NA	NA	---	NA	NA	hsa_circ_0009420	chr1	3692358	3692546	+	188	188	NM_001163724	LOC388588
hsa_circ_0091569	0.00117412	3.90455	5.64529	5.27322	5.53643	P	P	P	3.75525	3.58238	3.1902	P	P	P	hsa_circ_0091569	circRNA	AGGCAATCAGGGCCAATACTGTGCATGGCACCCGCTTCAAATATTGTGCCCATGATGCAC	NA	NA	NA	NA	NA	NA	NA	NA	NA	NA	NA	---	NA	NA	hsa_circ_0091569	chrX	131516205	131518726	-	2521	131	NM_001170704	MBNL3
hsa_circ_0075468	0.00615432	3.90341	4.35235	3.40991	3.73626	P	P	P	2.16567	2.05654	1.44541	A	A	A	hsa_circ_0075468	circRNA	TCCTCTATAAGCCCTGCATCATGGAAACTCTTTCTAATGCAAGTGGTACTTTTGCCATAC	NA	NA	NA	NA	NA	NA	NA	NA	NA	NA	NA	Man1b1	NA	NA	hsa_circ_0075468	chr6	2887503	2900855	-	13352	4034	NM_004155	SERPINB9
hsa_circ_0029741	0.012351	3.90113	6.36972	6.50432	6.60228	P	P	P	4.73715	4.75958	3.96488	P	P	P	hsa_circ_0029741	circRNA	GCGGTATCGGCGCCCGCCCAGCCCCGGGGGCAGGGAGAGCCTAGATTACGGAAGTACCGC	NA	NA	NA	NA	NA	NA	NA	NA	NA	NA	NA	Cabp5	NA	NA	hsa_circ_0029741	chr13	25026543	25086948	-	60405	3120	NM_006437	PARP4
hsa_circ_0030582	0.00051145	3.89447	8.98412	8.5555	8.58541	P	P	P	6.64076	6.65469	6.96267	P	P	P	hsa_circ_0030582	circRNA	TTAGATTTCATCCAGGCATCAGAGACCCCAACTCTACAAGGCCTTTCCTTTACTGTCAGA	NA	NA	NA	NA	NA	NA	NA	NA	NA	NA	NA	---	NA	NA	hsa_circ_0030582	chr13	95768175	95840796	-	72621	1272	NM_005845	ABCC4
hsa_circ_0063512	0.0311566	3.89432	8.75175	9.76431	9.83488	P	P	P	7.51047	7.53465	7.64931	P	P	P	hsa_circ_0063512	circRNA	TAAAGTCGTGTGGCAGCTTCAGTCATCGGGACCCTGGAGGAGGTCCACATGCCACAGAAT	NA	NA	NA	NA	NA	NA	NA	NA	NA	NA	NA	H2-Ea-ps	NA	NA	hsa_circ_0063512	chr22	41641614	41654110	-	12496	2141	NM_002883	RANGAP1
hsa_circ_0015494	6.17468e-05	3.89149	10.7207	10.4408	10.5888	P	P	P	8.65398	8.72419	8.49531	P	P	P	hsa_circ_0015494	circRNA	AGCCTGCCAATTCTTCAAGGCCTTTACCAAGAACGGCTCGGGAGCAGTATTTCCAGTGGC	NA	NA	NA	NA	NA	NA	NA	NA	NA	NA	NA	Gm884	NA	NA	hsa_circ_0015494	chr1	180144455	180145168	+	713	149	NM_002826	QSOX1
hsa_circ_0006871	0.000442806	3.89136	8.91558	8.58599	8.4623	P	P	P	6.61569	6.55677	6.92213	P	P	P	hsa_circ_0006871	circRNA	TGTTCGAACTGCATCAGAGACCCCAACTCTACAAGGCCTTTCCTTTACTGTCAGACCTGG	NA	NA	NA	NA	NA	NA	NA	NA	NA	NA	NA	---	NA	NA	hsa_circ_0006871	chr13	95829960	95840796	-	10836	464	NM_005845	ABCC4
hsa_circ_0019509	0.0157725	3.88767	7.36464	8.18198	8.12081	P	P	P	6.00041	6.04079	5.87877	P	P	P	hsa_circ_0019509	circRNA	AAACTGGTGATGTTCCAGAGGAGGGCAGGACGAGGTGGCACCAAATTCCCTTCGGCCAAT	NA	NA	NA	NA	NA	NA	NA	NA	NA	NA	NA	LOC102547353	NA	NA	hsa_circ_0019509	chr10	102106771	102114389	+	7618	1137	NM_005063	SCD
hsa_circ_0073778	4.19584e-05	3.88706	6.64363	6.67494	6.67284	P	P	P	4.6947	4.66128	4.75792	P	P	P	hsa_circ_0073778	circRNA	AGCTTATTTTGGGGTACTGTCTGTGAAAATGGATGTCAGAATGGTGGACGTTGCATCGGA	NA	NA	NA	NA	NA	NA	NA	NA	NA	NA	NA	---	NA	NA	hsa_circ_0073778	chr5	127593600	127855061	-	261461	9753	NM_001999	FBN2
hsa_circ_0030586	0.000309695	3.88597	9.08836	8.79435	8.74533	P	P	P	6.78424	6.79894	7.16186	P	P	P	hsa_circ_0030586	circRNA	TAGAAATCCAATAGGCATCAGAGACCCCAACTCTACAAGGCCTTTCCTTTACTGTCAGAC	NA	NA	NA	NA	NA	NA	NA	NA	NA	NA	NA	---	NA	NA	hsa_circ_0030586	chr13	95813442	95840796	-	27354	1192	NM_005845	ABCC4
hsa_circ_0085663	0.000159031	3.88439	6.14116	5.97723	6.29039	P	P	P	4.07383	4.27486	4.19689	P	P	P	hsa_circ_0085663	circRNA	ATGGTGGCTGTTGGTACCATTTTCAGATTTCATCTTCCTAAACTGGAAATGTCAATGAGA	NA	NA	NA	NA	NA	NA	NA	NA	NA	NA	NA	Os02g0111700	NA	NA	hsa_circ_0085663	chr8	134487961	134558169	-	70208	1090	NM_003033	ST3GAL1
hsa_circ_0016914	0.00254343	3.88142	4.53955	4.78062	5.13827	P	P	P	2.72309	2.91029	3.00472	P	P	P	hsa_circ_0016914	circRNA	GCGATTAGTACTACTGAGGAAAAGGCACATAGGAAATGACATCGTCACCATCGTCTTCCA	NA	NA	NA	NA	NA	NA	NA	NA	NA	NA	NA	MGEA5	NA	NA	hsa_circ_0016914	chr1	232600585	232607274	-	6689	735	NM_020808	SIPA1L2
hsa_circ_0079586	0.00426966	3.87124	5.47944	5.34178	5.22868	P	P	P	3.28633	3.10042	3.73913	P	P	P	hsa_circ_0079586	circRNA	AGGCAAAACGATTGCAGGAATTGACGCTGTATAATCCAGAACGCACTATTACAGTTAAAG	NA	NA	NA	NA	NA	NA	NA	NA	NA	NA	NA	---	NA	NA	hsa_circ_0079586	chr7	23353140	23383472	-	30332	586	NM_006547	IGF2BP3
hsa_circ_0087327	0.006577	3.87058	5.69973	5.65066	5.78123	P	P	P	3.80105	4.01563	3.39264	P	P	P	hsa_circ_0087327	circRNA	GCCGGGCACAACTGAAATCGCCAAGAGATTGAATACGATTTGTGCACAAGTCATCCCATT	NA	NA	NA	NA	NA	NA	NA	NA	NA	NA	NA	Retsat	NA	NA	hsa_circ_0087327	chr9	84248262	84268951	-	20689	360	NM_005077	TLE1
hsa_circ_0055031	0.000470724	3.86707	9.04589	8.69145	9.04676	P	P	P	7.06887	7.0387	6.84058	P	P	P	hsa_circ_0055031	circRNA	TGTCATCATCACCACCACACACTGTGCCAGTGAGCAGATTTATTATGAAAACAGACAAGG	NA	NA	NA	NA	NA	NA	NA	NA	NA	NA	NA	---	NA	NA	hsa_circ_0055031	chr2	69298885	69351775	+	52890	573	NM_032208	ANTXR1
hsa_circ_0059706	0.00320194	3.86637	5.38615	5.76469	6.01237	P	P	P	3.31813	4.10741	3.84434	P	P	P	hsa_circ_0059706	circRNA	ATGGTGGTAAACTCTCATTCCACGTTCTTAACTGTTCCATTTTCCGTATCTGCTTCGGGC	NA	NA	NA	NA	NA	NA	NA	NA	NA	NA	NA	---	NA	NA	hsa_circ_0059706	chr20	30193085	30194317	+	1232	1232	NM_181353	ID1
hsa_circ_0065065	0.000135106	3.86598	8.08212	8.10744	7.9393	P	P	P	6.14775	6.1957	5.92428	P	P	P	hsa_circ_0065065	circRNA	TTTGTCCGGAAATAAAAATAATAGTCTTGGAGTCTCGCCAGGGCGGGGCTCGGGCCGGTC	NA	NA	NA	NA	NA	NA	NA	NA	NA	NA	NA	---	NA	NA	hsa_circ_0065065	chr3	45123768	45187914	-	64146	6007	NM_022842	CDCP1
hsa_circ_0077967	0.00351291	3.86406	6.293	6.12971	6.46534	P	P	P	3.95701	4.37282	4.64574	P	P	P	hsa_circ_0077967	circRNA	CTGGTTCCAGTATGACTATGAATATGATGAAAATGGTGACAGAGTCGTTTTAGGAAAAGG	NA	NA	NA	NA	NA	NA	NA	NA	NA	NA	NA	---	NA	NA	hsa_circ_0077967	chr6	136901438	136944119	-	42681	1501	NM_005923	MAP3K5
hsa_circ_0019253	3.13771e-05	3.86395	9.86864	9.7413	9.63534	P	P	P	7.91177	7.7493	7.73676	P	P	P	hsa_circ_0019253	circRNA	AGTCTGAAGAAAAAGATCTGAACATAAAGTCTGGTCTCCTCTGGTGACGGAGGAAGGGAA	NA	NA	NA	NA	NA	NA	NA	NA	NA	NA	NA	cdk14	NA	NA	hsa_circ_0019253	chr10	97006971	97028619	-	21648	437	NM_020992	PDLIM1
hsa_circ_0060635	0.0271006	3.86223	3.62025	4.91293	4.83356	P	P	P	2.14622	2.62757	2.95608	A	P	P	hsa_circ_0060635	circRNA	TTTGACATTTTGTAAAAGGCCATTTCTTGGGAGTTCCATGCAGGTGATGAACAAGACCCG	NA	NA	NA	NA	NA	NA	NA	NA	NA	NA	NA	Pde7a	NA	NA	hsa_circ_0060635	chr20	46286149	46365686	-	79537	3394	NM_001161841	SULF2
hsa_circ_0077886	0.000340215	3.85728	8.27831	7.94947	7.88517	P	P	P	5.86344	6.13683	6.27196	P	P	P	hsa_circ_0077886	circRNA	CCAGATCAGCACATCAGTATTCCCCACAGCTGTATCCTTCCAATAATTACAAGTAGTGGC	NA	NA	NA	NA	NA	NA	NA	NA	NA	NA	NA	---	NA	NA	hsa_circ_0077886	chr6	133782251	133782318	+	67	67	NM_004100	EYA4
hsa_circ_0065063	4.58827e-05	3.85276	8.19856	8.28735	8.2411	P	P	P	6.349	6.33877	6.19807	P	P	P	hsa_circ_0065063	circRNA	TTTTGTCCGGAAATAAAAATAATAGTCTTGGAGTCTCGCCAGCTGCACAGACCACCGGTA	NA	NA	NA	NA	NA	NA	NA	NA	NA	NA	NA	---	NA	NA	hsa_circ_0065063	chr3	45123768	45135149	-	11381	4626	NM_022842	CDCP1
hsa_circ_0067495	0.000326415	3.84993	8.28824	8.30525	8.17376	P	P	P	6.4156	6.13807	6.36761	P	P	P	hsa_circ_0067495	circRNA	ACAGAATTCAGCAAATAAAAAGGGCCACCCTGGCCAAAAGCGGTCTTTAACCATCCTTAC	NA	NA	NA	NA	NA	NA	NA	NA	NA	NA	NA	---	NA	NA	hsa_circ_0067495	chr3	136708282	136729926	+	21644	1391	NM_144717	IL20RB
hsa_circ_0079536	0.0013726	3.84849	6.78188	6.81249	6.98298	P	P	P	4.71637	5.1703	4.82633	P	P	P	hsa_circ_0079536	circRNA	CCATGCTTCAGGCAGCTGTCTGTGAAAAGACAATAGATGTGCATCTTCAAATGCAGCATC	NA	NA	NA	NA	NA	NA	NA	NA	NA	NA	NA	---	NA	NA	hsa_circ_0079536	chr7	20403259	20420454	+	17195	674	NM_002214	ITGB8
hsa_circ_0072491	0.000131455	3.84688	5.81288	5.83146	5.86907	P	P	P	3.98263	3.85978	3.83617	P	P	P	hsa_circ_0072491	circRNA	GTTTGTGGCACTTCCATGCCTATGGCTGTTCTAAAATTGGGCCAAATATATCCATTTCAG	NA	NA	NA	NA	NA	NA	NA	NA	NA	NA	NA	Dusp22	NA	NA	hsa_circ_0072491	chr5	54737678	54786942	-	49264	494	NM_176895	PPAP2A
hsa_circ_0038714	4.52841e-05	3.8447	11.7348	11.7981	11.6975	P	P	P	9.81461	9.80852	9.78023	P	P	P	hsa_circ_0038714	circRNA	AACAGAAGGGGTGGAGTTTTGTATAAATAAAGTTTCTTTGTCTCTTTACCCCGCGCGGCG	NA	NA	NA	NA	NA	NA	NA	NA	NA	NA	NA	---	NA	NA	hsa_circ_0038714	chr16	27325250	27376099	+	50849	3668	NM_000418	IL4R
hsa_circ_0027683	0.0130577	3.84063	5.04142	4.9897	5.00265	P	P	P	2.58421	3.34623	3.17438	P	P	P	hsa_circ_0027683	circRNA	AGCTCTAACAAGGGCTACTTCTCCAGGAGAACAGCAGGTTTGCAGAAGCACTACATTATT	NA	NA	NA	NA	NA	NA	NA	NA	NA	NA	NA	rsrc1	NA	NA	hsa_circ_0027683	chr12	83358802	83379825	+	21023	472	NM_152588	TMTC2
hsa_circ_0073782	0.00107535	3.838	7.68555	7.70331	7.7651	P	P	P	5.65855	5.94534	5.71392	P	P	P	hsa_circ_0073782	circRNA	GGCTGTGTAGATACTCACATGCGCAGTACCTGCTATGGAGGAATCAAGAAAGGAGTGTGT	NA	NA	NA	NA	NA	NA	NA	NA	NA	NA	NA	---	NA	NA	hsa_circ_0073782	chr5	127622409	127705027	-	82618	4917	NM_001999	FBN2
hsa_circ_0072451	0.000135431	3.83379	7.29123	7.51287	7.58108	P	P	P	5.43378	5.41213	5.71799	P	P	P	hsa_circ_0072451	circRNA	AAGGAAGAGTCTACCTGTTTACTATCAAAGAGGATATTCTGATGCTGGGTGCAGTGGGAG	NA	NA	NA	NA	NA	NA	NA	NA	NA	NA	NA	---	NA	NA	hsa_circ_0072451	chr5	52355703	52358759	+	3056	429	NM_002203	ITGA2
hsa_circ_0020839	0.032401	3.83035	4.43167	3.94278	4.1646	P	P	P	2.11923	2.88613	1.37486	A	P	A	hsa_circ_0020839	circRNA	GGCTGGACAGGTTTGAGGCACAGAGCTGTATATACAATAACAGTGAAATTGATCCCACTA	NA	NA	NA	NA	NA	NA	NA	NA	NA	NA	NA	PSAT1	NA	NA	hsa_circ_0020839	chr11	3404691	3423959	+	19268	429	TCONS_l2_00005288	TCONS_l2_00005288
hsa_circ_0091324	0.0013318	3.82491	9.79404	9.36419	9.66206	P	P	P	7.5788	7.69616	7.76585	P	P	P	hsa_circ_0091324	circRNA	CTCTGACCAGTGGGCATTCCTCCAAGTAGACCAACGCCTTCAGACATGGCCATTGTTATG	NA	NA	NA	NA	NA	NA	NA	NA	NA	NA	NA	---	NA	NA	hsa_circ_0091324	chrX	108921216	108921644	-	428	275	NM_022977	ACSL4
hsa_circ_0077686	0.0309679	3.82144	5.90762	6.98459	7.02486	P	P	P	4.89333	4.84763	4.60961	P	P	P	hsa_circ_0077686	circRNA	TCGGAAACTTGAAATAAAGAGTTTTCCTTTGTAAGTTGCTGCTGGTTGCGCAGCCACCTC	NA	NA	NA	NA	NA	NA	NA	NA	NA	NA	NA	---	NA	NA	hsa_circ_0077686	chr6	112574985	112575493	-	508	508	NM_001105209	LAMA4
hsa_circ_0091326	0.00137068	3.81519	10.2619	9.95914	10.3977	P	P	P	8.18471	8.38028	8.28614	P	P	P	hsa_circ_0091326	circRNA	TGGATATTCTTCTCCGCTTACACTCTCTGACCAGGCGATTCGGCTGGCTCTGCCACACCA	NA	NA	NA	NA	NA	NA	NA	NA	NA	NA	NA	---	NA	NA	hsa_circ_0091326	chrX	108921216	108976621	-	55405	1558	NM_022977	ACSL4
hsa_circ_0031207	0.000900211	3.80645	9.42617	9.39937	9.2276	P	P	P	7.44019	7.41773	7.4177	P	P	P	hsa_circ_0031207	circRNA	ATTAGTGTCTTTCCCTCTATCATTAAAGGTGTTTTAACCAAGCTGGGTGCAGAGGCTGCC	NA	NA	NA	NA	NA	NA	NA	NA	NA	NA	NA	LOC101503391	NA	NA	hsa_circ_0031207	chr14	21989231	21994362	-	5131	5131	NM_005407	SALL2
hsa_circ_0031007	0.0101808	3.80579	4.36874	4.18663	4.68073	P	P	P	2.72889	2.74654	1.85265	A	P	A	hsa_circ_0031007	circRNA	TTTTTGGCTGTTAGATGCTCTTGTTGGAAGAATACTACCAGGATCGACCCGTACGGATTC	NA	NA	NA	NA	NA	NA	NA	NA	NA	NA	NA	---	NA	NA	hsa_circ_0031007	chr13	113999177	114018225	-	19048	530	NM_024719	GRTP1
hsa_circ_0054998	0.00127384	3.80165	6.90852	6.84374	6.87291	P	P	P	5.04429	4.77443	5.01252	P	P	P	hsa_circ_0054998	circRNA	AACCGAGCAGATGATTCAAGCCATACAAGTATTAAGGTTTCATCTATTGGAATTAGAGAA	NA	NA	NA	NA	NA	NA	NA	NA	NA	NA	NA	---	NA	NA	hsa_circ_0054998	chr2	66668545	66794643	+	126098	592	NM_002398	MEIS1
hsa_circ_0091319	0.00224946	3.80147	9.76577	9.35293	9.72847	P	P	P	7.63241	7.68375	7.7823	P	P	P	hsa_circ_0091319	circRNA	ATGTTATCAATGGGCATTCCTCCAAGTAGACCAACGCCTTCAGACATGGCCATTGTTATG	NA	NA	NA	NA	NA	NA	NA	NA	NA	NA	NA	---	NA	NA	hsa_circ_0091319	chrX	108884563	108921644	-	37081	4052	NM_022977	ACSL4
hsa_circ_0037012	0.00427258	3.79728	2.82205	3.47506	3.59054	P	P	P	1.07154	1.23441	1.81087	A	A	A	hsa_circ_0037012	circRNA	CTGATGTTCAAAAGGAATCTGAGAAAAAGGGGTTGATTGAAAGAATCTATATGGTACAGG	NA	NA	NA	NA	NA	NA	NA	NA	NA	NA	NA	---	NA	NA	hsa_circ_0037012	chr15	95001365	95020022	+	18657	318	NM_018349	MCTP2
hsa_circ_0087744	0.00100119	3.79629	6.46384	6.436	6.63227	P	P	P	4.78059	4.3458	4.60706	P	P	P	hsa_circ_0087744	circRNA	ATGATCACAGTTGTCCGTACAGATAGTCTGAAAGGGAGGAGAGGTCGTCTGCCTTCCAAA	NA	NA	NA	NA	NA	NA	NA	NA	NA	NA	NA	ANKRD28	NA	NA	hsa_circ_0087744	chr9	102595563	102609897	+	14334	552	NM_173200	NR4A3
hsa_circ_0028218	0.000418672	3.79562	4.80493	4.54975	4.41282	P	P	P	2.4179	2.86724	2.70187	A	P	P	hsa_circ_0028218	circRNA	ATCATCAATGGTATTCCACTACATGAGCATCACCATCTTGGTCTTTTTTATGATGGAGAT	NA	NA	NA	NA	NA	NA	NA	NA	NA	NA	NA	---	NA	NA	hsa_circ_0028218	chr12	111089021	111089253	-	232	232	NM_001040107	HVCN1
hsa_circ_0069180	0.0113759	3.7892	2.94004	3.12525	2.70269	P	P	P	0.557685	0.773766	1.51829	A	A	A	hsa_circ_0069180	circRNA	AGTGGGCCAGGAAGCACACTTTGCTGGCCAATAATGGGTTTGCAATTTCTGCTGCATTGC	NA	NA	NA	NA	NA	NA	NA	NA	NA	NA	NA	MIR379	NA	NA	hsa_circ_0069180	chr4	9889190	9987417	-	98227	881	NM_001001290	SLC2A9
hsa_circ_0091327	0.00631459	3.78773	9.738	9.22014	9.62941	P	P	P	7.6502	7.62969	7.59309	P	P	P	hsa_circ_0091327	circRNA	CTGGACTGGGTGGGCATTCCTCCAAGTAGACCAACGCCTTCAGACATGGCCATTGTTATG	NA	NA	NA	NA	NA	NA	NA	NA	NA	NA	NA	---	NA	NA	hsa_circ_0091327	chrX	108921493	108921644	-	151	151	NM_022977	ACSL4
hsa_circ_0025761	0.0108091	3.7866	8.91036	8.3111	8.27319	P	P	P	6.6024	6.65386	6.56654	P	P	P	hsa_circ_0025761	circRNA	TACATGCCTAGGAGTCTGGATCAGGGCTGTGTTGGGGGAAGTTTCCCTTCCACGGTGTCT	NA	NA	NA	NA	NA	NA	NA	NA	NA	NA	NA	RSPH10B	NA	NA	hsa_circ_0025761	chr12	29757110	29908818	-	151708	696	NM_175861	TMTC1
hsa_circ_0024584	6.16981e-05	3.78614	11.8964	11.7597	11.899	P	P	P	9.96969	9.89441	9.93219	P	P	P	hsa_circ_0024584	circRNA	TTTTCTCAGAGATCACTCAATAAACCTAAGAACCCTCGACTGCCGGGACCTCGAGGGGAC	NA	NA	NA	NA	NA	NA	NA	NA	NA	NA	NA	---	NA	NA	hsa_circ_0024584	chr11	119209651	119210558	-	907	907	NM_015645	C1QTNF5
hsa_circ_0015065	1.17536e-05	3.78465	7.26223	7.12352	7.13701	P	P	P	5.30379	5.3071	5.14997	P	P	P	hsa_circ_0015065	circRNA	TGACCCAGAAGGTATGGCTTTTCCACCAAAAGCCTGAATCTCTCAATCCTCTGATCAAAT	NA	NA	NA	NA	NA	NA	NA	NA	NA	NA	NA	---	NA	NA	hsa_circ_0015065	chr1	162775183	162775282	+	99	99	NM_016371	HSD17B7
hsa_circ_0027376	0.000805879	3.7798	4.68766	5.11292	4.66267	P	P	P	2.61411	3.12604	2.96743	A	P	P	hsa_circ_0027376	circRNA	TAATGATGGGATTGTTCTTCATGTATGGAGCATACCTGAGAATGGCTTCCAACGCATGCG	NA	NA	NA	NA	NA	NA	NA	NA	NA	NA	NA	---	NA	NA	hsa_circ_0027376	chr12	64038182	64062354	-	24172	984	NM_173812	DPY19L2
hsa_circ_0087741	0.00044609	3.76978	8.84611	8.52697	8.69869	P	P	P	6.60306	6.68623	7.02181	P	P	P	hsa_circ_0087741	circRNA	ATGATCACAGGCCCTCATCACCTTTTTTCAAGTCAAGATTTCATCCCATACATGCATGAC	NA	NA	NA	NA	NA	NA	NA	NA	NA	NA	NA	Ankrd28	NA	NA	hsa_circ_0087741	chr9	102589011	102609897	+	20886	1707	NM_173200	NR4A3
hsa_circ_0027495	0.010511	3.76626	6.60051	6.41767	6.46869	P	P	P	4.52293	4.95897	4.16089	P	P	P	hsa_circ_0027495	circRNA	TATAATAAATACTGTTGGGCGGGAGCTGCTGCTCCATCTGATTGACTATCTCGTAACCAG	NA	NA	NA	NA	NA	NA	NA	NA	NA	NA	NA	---	NA	NA	hsa_circ_0027495	chr12	69252702	69265736	-	13034	831	NM_001874	CPM
hsa_circ_0079580	0.000444103	3.76608	6.6873	6.6046	6.44483	P	P	P	4.51765	4.57234	4.88942	P	P	P	hsa_circ_0079580	circRNA	ATTTAGGTGCAATTGCTCCAGCGGAAGCACCAGATGCTAAAGTGAGGATGGTGATTATCA	NA	NA	NA	NA	NA	NA	NA	NA	NA	NA	NA	---	NA	NA	hsa_circ_0079580	chr7	23349827	23357332	-	7505	2573	NM_006547	IGF2BP3
hsa_circ_0073570	0.000281443	3.76596	6.23231	6.52218	6.28521	P	P	P	4.19908	4.54163	4.54975	P	P	P	hsa_circ_0073570	circRNA	CTCTTTTTCACTCTGAAAGATGTAACTGTTTGGAGAAAACCCTCAGAAGAATTTAATGGA	NA	NA	NA	NA	NA	NA	NA	NA	NA	NA	NA	OVOS2	NA	NA	hsa_circ_0073570	chr5	110835943	110842077	-	6134	1048	NM_139164	STARD4
hsa_circ_0050649	0.00433744	3.75816	4.57375	4.24851	4.43651	P	P	P	2.10617	2.81208	2.5429	A	P	P	hsa_circ_0050649	circRNA	AATAAATGTGCTAGAGCTCTGCACTGCAACGCGGAGGAGCAGGATGGAGATCCCTGTGCC	NA	NA	NA	NA	NA	NA	NA	NA	NA	NA	NA	---	NA	NA	hsa_circ_0050649	chr19	36245469	36247930	-	2461	1457	NM_144617	HSPB6
hsa_circ_0012001	0.00910453	3.75146	8.8673	8.91402	8.88635	P	P	P	7.24	7.03337	6.60066	P	P	P	hsa_circ_0012001	circRNA	TTTCATTGTGGGCATGTGCTTCCAGTATGTGGAGGTCTTCTATTACTCCACGAGCATCTT	NA	NA	NA	NA	NA	NA	NA	NA	NA	NA	NA	MIR370	NA	NA	hsa_circ_0012001	chr1	43393275	43394985	-	1710	411	NM_006516	SLC2A1
hsa_circ_0022770	0.000900275	3.74558	6.79254	6.56489	6.70572	P	P	P	4.88703	4.91655	4.52036	P	P	P	hsa_circ_0022770	circRNA	TTGCCCTGCGGCAATCCGATTTACGACTTTTTTCTGGGACGAGAGCTCAACCCTCGTATC	NA	NA	NA	NA	NA	NA	NA	NA	NA	NA	NA	RHEB	NA	NA	hsa_circ_0022770	chr11	64880962	64883070	+	2108	597	NM_003273	TM7SF2
hsa_circ_0087446	0.0233756	3.74434	3.15317	4.33857	4.04875	P	P	P	1.28593	2.66482	1.77371	A	P	A	hsa_circ_0087446	circRNA	AAGTACCCAAATAAATGAGAAGCTTCTATCCTTACCGGGGAGCTCTGCACAAAGCCATCA	NA	NA	NA	NA	NA	NA	NA	NA	NA	NA	NA	Lrrc7	NA	NA	hsa_circ_0087446	chr9	91992151	92001397	-	9246	2726	NM_006378	SEMA4D
hsa_circ_0025769	0.00235651	3.73298	8.3823	8.0543	7.87879	P	P	P	6.1009	6.26032	6.29193	P	P	P	hsa_circ_0025769	circRNA	AAGACAAGTCGTGGCTGGGATCGTTGGCAGAGCGGACGTGTTAGCGTGTCTGCTGTTTCT	NA	NA	NA	NA	NA	NA	NA	NA	NA	NA	NA	RSR1	NA	NA	hsa_circ_0025769	chr12	29908641	29911710	-	3069	251	NM_175861	TMTC1
hsa_circ_0064582	0.000299674	3.72924	5.45569	5.30252	5.40995	P	P	P	3.60059	3.31488	3.5447	P	P	P	hsa_circ_0064582	circRNA	GGGTGCCAAGTTCCACACATGATTTAATGAATAAGAAGATCTGCGATTTCCTTCTGGTTG	NA	NA	NA	NA	NA	NA	NA	NA	NA	NA	NA	RBFOX2	NA	NA	hsa_circ_0064582	chr3	24378790	24378862	-	72	72	NM_001252634	THRB
hsa_circ_0079581	0.00538304	3.72406	5.59933	5.31378	5.11944	P	P	P	2.94452	3.56195	3.75754	P	P	P	hsa_circ_0079581	circRNA	TTTAGGTGCACTTCAAGCACATTTAATTCCTGGATTAAATCTGAACGCCTTGGGTCTGTT	NA	NA	NA	NA	NA	NA	NA	NA	NA	NA	NA	---	NA	NA	hsa_circ_0079581	chr7	23349827	23381808	-	31981	2816	NM_006547	IGF2BP3
hsa_circ_0044161	0.00336539	3.72291	5.2261	5.02815	5.29773	P	P	P	3.17779	3.00834	3.61926	P	P	P	hsa_circ_0044161	circRNA	AAGAACACAGGTGGGTGCAGGAGTTCCTCAATGAAGAGAACCGTGGCCTGGATGTGCTGC	NA	NA	NA	NA	NA	NA	NA	NA	NA	NA	NA	---	NA	NA	hsa_circ_0044161	chr17	43311014	43311320	+	306	306	NM_005892	FMNL1
hsa_circ_0044163	0.000302536	3.72212	5.30229	5.08121	5.0235	P	P	P	3.05415	3.20344	3.44856	P	P	P	hsa_circ_0044163	circRNA	AGATCACCGGCACTGTCTTCACAGAGCTCAATGATGAGAAGGTGCTGCAGGCTGACCCCA	NA	NA	NA	NA	NA	NA	NA	NA	NA	NA	NA	---	NA	NA	hsa_circ_0044163	chr17	43313502	43319832	+	6330	1396	NM_005892	FMNL1
hsa_circ_0074942	0.00154965	3.71975	5.69758	5.63249	5.3912	P	P	P	3.68193	3.3773	3.93969	P	P	P	hsa_circ_0074942	circRNA	CATTCTGATTGGCATTTTTCCTAAGTCATTTATCCACATCAAGGAAGTGACAGTTGAGAA	NA	NA	NA	NA	NA	NA	NA	NA	NA	NA	NA	---	NA	NA	hsa_circ_0074942	chr5	169097545	169267856	+	170311	2631	NM_004946	DOCK2
hsa_circ_0072489	0.000290181	3.71584	13.2618	12.9642	12.9943	P	P	P	11.1622	11.2871	11.1027	P	P	P	hsa_circ_0072489	circRNA	ACTGGACTCATTCAGGGAGCTCTGGTTGCAATATTAGTTTCAGCGGGAGGGGCTGGACCC	NA	NA	NA	NA	NA	NA	NA	NA	NA	NA	NA	Dusp22	NA	NA	hsa_circ_0072489	chr5	54721690	54830873	-	109183	1145	NM_176895	PPAP2A
hsa_circ_0061104	0.0040526	3.71556	4.26382	3.80001	3.58904	P	P	P	2.23447	2.20758	1.50232	A	A	A	hsa_circ_0061104	circRNA	GAACGGAGAGCCTCCAAGAGGGACTGTCTGGAGCGGTTCGGGCCACAGACGCTGGAGCGC	NA	NA	NA	NA	NA	NA	NA	NA	NA	NA	NA	---	NA	NA	hsa_circ_0061104	chr20	60927297	60927416	-	119	119	NM_005560	LAMA5
hsa_circ_0018671	0.00753312	3.71381	7.62025	8.10453	8.17097	P	P	P	6.04501	6.1279	6.10296	P	P	P	hsa_circ_0018671	circRNA	AATTTTATGTATTTATTAACATCGCCATTGGACCCCAAGTGGGTGACGGAGGAGTGGGGT	NA	NA	NA	NA	NA	NA	NA	NA	NA	NA	NA	---	NA	NA	hsa_circ_0018671	chr10	72513555	72522195	+	8640	2529	NM_139155	ADAMTS14
hsa_circ_0022391	0.00169066	3.71072	8.346	7.98262	8.31182	P	P	P	6.34694	6.38715	6.25525	P	P	P	hsa_circ_0022391	circRNA	CAGTAGCCAGGACCTGGCCTGGGCCGTCAGCTACTACATCCGGTTCTTCATCACCTACAT	NA	NA	NA	NA	NA	NA	NA	NA	NA	NA	NA	---	NA	NA	hsa_circ_0022391	chr11	61630443	61630850	+	407	195	NM_004265	FADS2
hsa_circ_0063510	0.0337832	3.70728	10.2543	11.2667	11.3862	P	P	P	9.20376	9.23522	9.0326	P	P	P	hsa_circ_0063510	circRNA	CACAAATAAAGTCGTGTGGCAGCTTCAGAGCTGAACTTGTCATTCTGTGAAATCAAGAGG	NA	NA	NA	NA	NA	NA	NA	NA	NA	NA	NA	H2-D1	NA	NA	hsa_circ_0063510	chr22	41641614	41652294	-	10680	1868	NM_002883	RANGAP1
hsa_circ_0087322	0.000504031	3.7047	5.97278	6.02904	6.16332	P	P	P	4.13173	4.35627	3.99218	P	P	P	hsa_circ_0087322	circRNA	AACCAAGCGGACTGAAATCGCCAAGAGATTGAATACGATTTGTGCACAAGTCATCCCATT	NA	NA	NA	NA	NA	NA	NA	NA	NA	NA	NA	RERG	NA	NA	hsa_circ_0087322	chr9	84228291	84268951	-	40660	829	NM_005077	TLE1
hsa_circ_0087329	0.028219	3.70431	6.08131	6.09781	6.24513	P	P	P	4.85236	3.95418	3.68459	P	P	P	hsa_circ_0087329	circRNA	CACCACAGAGACTGAAATCGCCAAGAGATTGAATACGATTTGTGCACAAGTCATCCCATT	NA	NA	NA	NA	NA	NA	NA	NA	NA	NA	NA	Rev1	NA	NA	hsa_circ_0087329	chr9	84249011	84268951	-	19940	343	NM_005077	TLE1
hsa_circ_0005467	0.00845429	3.70385	3.45808	3.83842	4.3835	P	P	P	2.29215	2.03389	1.79558	A	A	A	hsa_circ_0005467	circRNA	CTTCTCCAAGCTTTCCTCAAATGAAAGAGATAGCAGTGAACCAGGGAATTTCATTCCTCT	NA	NA	NA	NA	NA	NA	NA	NA	NA	NA	NA	---	NA	NA	hsa_circ_0005467	chr3	48209335	48219478	-	10143	480	NM_001789	CDC25A
hsa_circ_0030587	0.00185522	3.70261	8.09341	7.93788	7.71134	P	P	P	5.98326	6.09373	6.02319	P	P	P	hsa_circ_0030587	circRNA	AATCCAATAGGAAGGAGATTTCCAAGATTCTGAGAAGTTCCTGCCTCAGAGGGATGAATT	NA	NA	NA	NA	NA	NA	NA	NA	NA	NA	NA	---	NA	NA	hsa_circ_0030587	chr13	95813442	95859035	-	45593	1544	NM_005845	ABCC4
hsa_circ_0069364	0.00133202	3.7025	7.42323	7.2717	7.42199	P	P	P	5.60841	5.58584	5.23246	P	P	P	hsa_circ_0069364	circRNA	AGCAGCTCAGAATGTTGTACCATCTTTGGGTAGGCAGACTTCCCTGACGACATCAGTGAT	NA	NA	NA	NA	NA	NA	NA	NA	NA	NA	NA	LRP8	NA	NA	hsa_circ_0069364	chr4	25792076	25849486	-	57410	1914	NM_015187	SEL1L3
hsa_circ_0087333	0.0206748	3.69998	3.08345	3.75058	3.96306	P	P	P	1.23796	2.44597	1.22417	A	P	A	hsa_circ_0087333	circRNA	TACCAGGTCTACCTCCTACAAGGAGAAGAGCAAAGAAAAGCAGTCCGTCTGGATTTGTTT	NA	NA	NA	NA	NA	NA	NA	NA	NA	NA	NA	Rev3l	NA	NA	hsa_circ_0087333	chr9	84267098	84303596	-	36498	843	NM_005077	TLE1
hsa_circ_0067677	0.0194582	3.69124	3.74263	4.35586	4.2231	P	P	P	1.47542	2.21392	2.7683	A	A	P	hsa_circ_0067677	circRNA	ACAGATCCAGAGACACTTTTTTCAAAACTTAGGATCTATTTTAACGTATGCCTTCTTGGG	NA	NA	NA	NA	NA	NA	NA	NA	NA	NA	NA	Morc3	NA	NA	hsa_circ_0067677	chr3	143412033	143513919	-	101886	193	NM_173653	SLC9A9
hsa_circ_0008158	0.000234188	3.6899	7.0182	6.88322	6.92803	P	P	P	4.9942	4.9634	5.21152	P	P	P	hsa_circ_0008158	circRNA	TCAAGTGAACAATTGCCCTCTTGGAACAGAGATCATGATGACACGGCATCTACTCGTTCA	NA	NA	NA	NA	NA	NA	NA	NA	NA	NA	NA	---	NA	NA	hsa_circ_0008158	chr2	66691240	66775151	+	83911	335	NM_002398	MEIS1
hsa_circ_0007890	0.0213905	3.68914	6.37001	7.23486	7.18893	P	P	P	5.12999	5.13391	5.02998	P	P	P	hsa_circ_0007890	circRNA	AAACTATGGAGAAGACCAGTCCAATGGAGAAAATGCAGAAGTCTCCATGGACGTTTCCCT	NA	NA	NA	NA	NA	NA	NA	NA	NA	NA	NA	Y38F2AR.9	NA	NA	hsa_circ_0007890	chr1	68603462	68624930	-	21468	1137	NM_024911	WLS
hsa_circ_0019251	0.000324922	3.68483	9.40557	9.05022	9.1518	P	P	P	7.28419	7.23596	7.45676	P	P	P	hsa_circ_0019251	circRNA	TAGACTACAAGTCACTCCTGGAAGCAAGGCGGCTCTAGCTAATTTATGTATTGGAGATGT	NA	NA	NA	NA	NA	NA	NA	NA	NA	NA	NA	Cdk13	NA	NA	hsa_circ_0019251	chr10	96997329	97031541	-	34212	1246	NM_020992	PDLIM1
hsa_circ_0007342	0.000205798	3.68469	7.62103	7.29208	7.35799	P	P	P	5.59126	5.34099	5.69322	P	P	P	hsa_circ_0007342	circRNA	GAAAAATGAACTAGAGAGATTGCAAGCTGAAAATACCTCGGAGTGGGACAAGAGGGAAAT	NA	NA	NA	NA	NA	NA	NA	NA	NA	NA	NA	---	NA	NA	hsa_circ_0007342	chr18	66564455	66564919	+	464	464	NM_001093729	CCDC102B
hsa_circ_0060938	0.00441331	3.68359	5.15173	4.97119	5.16929	P	P	P	2.8493	3.30762	3.43657	P	P	P	hsa_circ_0060938	circRNA	AAGAATTGTATGCTGCTGTCACAGAGCTCCAGCTGGCTGCGGTGGAAACGGGAAGGGGAA	NA	NA	NA	NA	NA	NA	NA	NA	NA	NA	NA	---	NA	NA	hsa_circ_0060938	chr20	52779255	52788209	-	8954	541	NM_000782	CYP24A1
hsa_circ_0069367	0.00107517	3.67569	7.02049	6.85901	6.98237	P	P	P	4.84637	5.13403	5.22574	P	P	P	hsa_circ_0069367	circRNA	TAAATGTTCCTCGGGATCAGCTGCAGTGCCAAGGAACCAAAATGAATCTGTATCAGAAAT	NA	NA	NA	NA	NA	NA	NA	NA	NA	NA	NA	lrpprc	NA	NA	hsa_circ_0069367	chr4	25806162	25806374	-	212	212	NM_015187	SEL1L3
hsa_circ_0072381	0.0020325	3.67412	9.04052	9.49997	9.45051	P	P	P	7.46181	7.57545	7.35574	P	P	P	hsa_circ_0072381	circRNA	CGGTGAGGTGAATAACTTTGAAATAAAGTTTTAGAGAAATGTTTCAGATAGGTCTGCTCT	NA	NA	NA	NA	NA	NA	NA	NA	NA	NA	NA	---	NA	NA	hsa_circ_0072381	chr5	43289492	43293075	-	3583	2120	NM_001098272	HMGCS1
hsa_circ_0024579	0.0120926	3.6725	4.42567	3.59783	3.75525	P	P	P	2.26279	2.4433	1.37158	A	A	A	hsa_circ_0024579	circRNA	ACCTCCACAGGTCGCTACCTGTGTAGGGAGGAACGGGTACCCCATTCCTCAAGTCATCTG	NA	NA	NA	NA	NA	NA	NA	NA	NA	NA	NA	---	NA	NA	hsa_circ_0024579	chr11	119181799	119185286	-	3487	1174	NM_006500	MCAM
hsa_circ_0077884	0.00179926	3.6724	7.42597	7.07808	7.10121	P	P	P	5.09885	5.17019	5.66479	P	P	P	hsa_circ_0077884	circRNA	TTACCAAATGCCAGGTCTATGGAAATGCAGGACCTAGCAAGTCCTCATACTCTTGTTGGA	NA	NA	NA	NA	NA	NA	NA	NA	NA	NA	NA	---	NA	NA	hsa_circ_0077884	chr6	133767767	133783902	+	16135	641	NM_004100	EYA4
hsa_circ_0075817	0.00134381	3.66775	2.65195	2.77952	3.07724	P	P	P	1.2957	0.769046	0.788869	A	A	A	hsa_circ_0075817	circRNA	AATGACTGATGAGTGCTCTTCAGACTCTTTTGCTATCTGGAAACCCATGTCCACCTCTGA	NA	NA	NA	NA	NA	NA	NA	NA	NA	NA	NA	---	NA	NA	hsa_circ_0075817	chr6	21743147	21802971	+	59824	40876	NR_015410	LINC00340
hsa_circ_0081171	0.00254957	3.66398	7.56684	8.26511	8.05181	P	P	P	6.30526	6.22339	5.76386	P	P	P	hsa_circ_0081171	circRNA	ACTTCCCATTAATGACCTGAAGGAGGGTGTACAGTATTTTCTCCAAGGTACACTCCGATC	NA	NA	NA	NA	NA	NA	NA	NA	NA	NA	NA	MDP1	NA	NA	hsa_circ_0081171	chr7	94248069	94259153	-	11084	553	NM_001099401	SGCE
hsa_circ_0073806	0.00286582	3.66391	6.91098	6.89502	6.95552	P	P	P	5.05407	4.83824	5.224	P	P	P	hsa_circ_0073806	circRNA	TGTGAAAGAGCGATTTGTAGAAATAGTTGTGGAGATGGATTTTGTTCCCGTCCTAACATG	NA	NA	NA	NA	NA	NA	NA	NA	NA	NA	NA	---	NA	NA	hsa_circ_0073806	chr5	127854965	127866386	-	11421	291	NM_001999	FBN2
hsa_circ_0046921	0.000926569	3.66191	6.39488	6.14415	6.36497	P	P	P	4.40652	4.47574	4.41572	P	P	P	hsa_circ_0046921	circRNA	AGCATTCCAGATAGGAGCATGTGGATACATTGGAACATTGGTGCACAATAGTTGTTGGTT	NA	NA	NA	NA	NA	NA	NA	NA	NA	NA	NA	COX10	NA	NA	hsa_circ_0046921	chr18	10736601	10750185	-	13584	648	NM_022068	PIEZO2
hsa_circ_0015493	0.00117587	3.66114	9.61149	9.12487	9.39108	P	P	P	7.53138	7.63624	7.37156	P	P	P	hsa_circ_0015493	circRNA	TCTTTGAAAAGGGAGGCTCCTACCTGGGTAGAGAGCCTGGAGGCCGGCCCTGTATCTCGC	NA	NA	NA	NA	NA	NA	NA	NA	NA	NA	NA	Gm884	NA	NA	hsa_circ_0015493	chr1	180135625	180148019	+	12394	341	NM_002826	QSOX1
hsa_circ_0073777	0.000207267	3.65971	7.72105	7.38566	7.52696	P	P	P	5.7773	5.55126	5.7006	P	P	P	hsa_circ_0073777	circRNA	TTTTGGGGTAATACTCGCCAGAGCTTCTGCTTCACAAATTTTGAAAATGGAAAGTGTTCT	NA	NA	NA	NA	NA	NA	NA	NA	NA	NA	NA	---	NA	NA	hsa_circ_0073777	chr5	127593600	127626576	-	32976	3993	NM_001999	FBN2
hsa_circ_0065364	0.0114835	3.65173	4.10565	4.85971	5.10885	P	P	P	2.60795	3.19004	2.78499	P	P	P	hsa_circ_0065364	circRNA	CTACAAGTACATCAACAAGTACTATGACCAGTGGTACTGTATGACTGTTCCGTGGGACAT	NA	NA	NA	NA	NA	NA	NA	NA	NA	NA	NA	dgat2	NA	NA	hsa_circ_0065364	chr3	48447130	48459772	-	12642	3254	NM_002673	PLXNB1
hsa_circ_0019254	0.00101046	3.64867	9.16875	8.89176	9.00667	P	P	P	7.1413	7.13472	7.20159	P	P	P	hsa_circ_0019254	circRNA	ACAGCAGACCGTCACTCCTGGAAGCAAGGCGGCTCTAGCTAATTTATGTATTGGAGATGT	NA	NA	NA	NA	NA	NA	NA	NA	NA	NA	NA	cdk14	NA	NA	hsa_circ_0019254	chr10	97023620	97031541	-	7921	437	NM_020992	PDLIM1
hsa_circ_0073797	0.00155824	3.6462	6.55858	6.53047	6.53853	P	P	P	4.53783	4.67045	4.80765	P	P	P	hsa_circ_0073797	circRNA	AGCAAACTCAGCTCCACAGGATTGATCTGTATTGATCAGAGAACAGGCATGTGTTTCTCG	NA	NA	NA	NA	NA	NA	NA	NA	NA	NA	NA	---	NA	NA	hsa_circ_0073797	chr5	127692967	127730967	-	38000	1596	NM_001999	FBN2
hsa_circ_0083436	0.00651293	3.64214	4.69336	4.2824	4.26834	P	P	P	2.96171	2.51398	2.08243	A	A	A	hsa_circ_0083436	circRNA	TTCTCTCGTGAGCTTTCTGGTAGGATTCCTAGCTTTGATGGCCTTTCTGTTTGACCTGAA	NA	NA	NA	NA	NA	NA	NA	NA	NA	NA	NA	MMD2	NA	NA	hsa_circ_0083436	chr8	17415803	17418042	+	2239	309	NM_001008539	SLC7A2
hsa_circ_0091318	0.000115932	3.64135	9.85027	9.63366	9.6414	P	P	P	7.78012	7.83638	7.92247	P	P	P	hsa_circ_0091318	circRNA	ATGTTATCAAGCGGTTATACAATTAATGACAAGCCAAACCCCAGAGGTGAAATCGTAATT	NA	NA	NA	NA	NA	NA	NA	NA	NA	NA	NA	---	NA	NA	hsa_circ_0091318	chrX	108884563	108906631	-	22068	3317	NM_022977	ACSL4
hsa_circ_0016870	0.00126782	3.63748	7.16431	7.14137	7.23057	P	P	P	5.43787	5.12952	5.36389	P	P	P	hsa_circ_0016870	circRNA	ATTGAGCAATGACCGCATCAGGGTGGGGGAGGGTATGCGGAAGCGAGCACCCCAGTCTGA	NA	NA	NA	NA	NA	NA	NA	NA	NA	NA	NA	---	NA	NA	hsa_circ_0016870	chr1	230839938	230846599	-	6661	1272	NM_000029	AGT
hsa_circ_0069972	0.0392301	3.63434	3.86819	3.27091	3.85363	P	P	P	2.18053	2.15674	0.730685	A	A	A	hsa_circ_0069972	circRNA	CTAAACTTCATGGAAACAAGGAAAACTGATTAAGAGAAATGAGCACGCATGGAAAAGTTT	NA	NA	NA	NA	NA	NA	NA	NA	NA	NA	NA	---	NA	NA	hsa_circ_0069972	chr4	74861358	74863372	-	2014	2014	NM_002994	CXCL5
hsa_circ_0022383	8.78116e-05	3.63131	10.975	10.7014	10.8912	P	P	P	8.87844	9.0804	9.03314	P	P	P	hsa_circ_0022383	circRNA	ATGTGAACATGCTGCACGTGTTTGTTCTGGGCGAATGGCAGCCCATCGAGGATGCCTTCC	NA	NA	NA	NA	NA	NA	NA	NA	NA	NA	NA	---	NA	NA	hsa_circ_0022383	chr11	61605249	61615756	+	10507	537	NM_004265	FADS2
hsa_circ_0016292	0.0004374	3.62999	8.69985	8.43292	8.47413	P	P	P	6.6736	6.61951	6.74566	P	P	P	hsa_circ_0016292	circRNA	GAGTGCAGAGGTAGCTGCGAGGTGCCAACAAGGCTAAATTCTGCATCCCTCAAACAGCCT	NA	NA	NA	NA	NA	NA	NA	NA	NA	NA	NA	---	NA	NA	hsa_circ_0016292	chr1	207497903	207500182	+	2279	378	NM_001114752	CD55
hsa_circ_0039460	0.0294569	3.62796	11.2177	12.164	12.2222	P	P	P	10.1637	10.0398	10.0205	P	P	P	hsa_circ_0039460	circRNA	ATAATGTGAATGATAATAAAACAGCTTTGACTTGAGTGACTCCTGCACCTGCGCCGGCTC	NA	NA	NA	NA	NA	NA	NA	NA	NA	NA	NA	---	NA	NA	hsa_circ_0039460	chr16	56642903	56643409	+	506	301	NM_005953	MT2A
hsa_circ_0073792	0.00240061	3.62263	8.15398	7.80596	7.76517	P	P	P	6.04311	6.13223	6.00825	P	P	P	hsa_circ_0073792	circRNA	AAGTGTAGCTGCAGAGAAGGCTGGATTGGAAACGGCATCAAGTGTATTGATTACAGGACA	NA	NA	NA	NA	NA	NA	NA	NA	NA	NA	NA	---	NA	NA	hsa_circ_0073792	chr5	127668603	127800614	-	132011	3594	NM_001999	FBN2
hsa_circ_0083946	2.35567e-05	3.62257	5.88717	6.04837	5.85887	P	P	P	4.05877	4.16535	4.00177	P	P	P	hsa_circ_0083946	circRNA	TCAAGCCCCGGTGGTATAAGTTGAAATCCAAACCAGGAAAGAAGGACAAGGAGCGAGGAG	NA	NA	NA	NA	NA	NA	NA	NA	NA	NA	NA	GNAI2	NA	NA	hsa_circ_0083946	chr8	37732032	37735069	-	3037	1251	NM_001002814	RAB11FIP1
hsa_circ_0034338	1.5757e-05	3.6223	9.93207	9.7743	9.9416	P	P	P	7.93704	8.11209	8.02887	P	P	P	hsa_circ_0034338	circRNA	TAAATTAAACCTATTCTTTCTGTGGCCCTGCATGTGACGGAGCGCAAATACCTGAAGCGA	NA	NA	NA	NA	NA	NA	NA	NA	NA	NA	NA	---	NA	NA	hsa_circ_0034338	chr15	33023128	33026870	+	3742	3742	NM_001191323	GREM1
hsa_circ_0025435	0.0490312	3.62161	4.46907	4.29068	4.07999	P	P	P	1.31487	2.86582	2.68076	A	P	P	hsa_circ_0025435	circRNA	AAGTACTTCCCTGAGACATGGATCTGGGATTTGGTGGTGGTAAAGCAGTATATGGTTCTG	NA	NA	NA	NA	NA	NA	NA	NA	NA	NA	NA	---	NA	NA	hsa_circ_0025435	chr12	9246060	9266139	-	20079	2154	NM_000014	A2M
hsa_circ_0022390	8.17606e-05	3.61929	9.88569	9.68689	9.83632	P	P	P	7.8863	7.96151	7.99905	P	P	P	hsa_circ_0022390	circRNA	ACATCATCAGTACGGCAAGAAGAAGCTGAAATACCTGCCCTACAATCACCAGCACGAATA	NA	NA	NA	NA	NA	NA	NA	NA	NA	NA	NA	---	NA	NA	hsa_circ_0022390	chr11	61624482	61632749	+	8267	539	NM_004265	FADS2
hsa_circ_0074956	0.00059922	3.61673	5.9961	5.62322	5.80388	P	P	P	4.02543	4.00413	3.84719	P	P	P	hsa_circ_0074956	circRNA	CTTCCTGCGGAATGCCGGGACATTCTGCTTCCTGTCATCACCAAAGAGCTGAAGGAGCTG	NA	NA	NA	NA	NA	NA	NA	NA	NA	NA	NA	---	NA	NA	hsa_circ_0074956	chr5	169230061	169474618	+	244557	1517	NM_004946	DOCK2
hsa_circ_0026341	0.000488296	3.61274	6.96662	6.85563	7.08618	P	P	P	4.91806	5.3074	5.10665	P	P	P	hsa_circ_0026341	circRNA	ATCGTGAATGGCTTCATCGCCTCAGACATGACCTCCCGCAACTCGAGCACGCAGCTGTGG	NA	NA	NA	NA	NA	NA	NA	NA	NA	NA	NA	---	NA	NA	hsa_circ_0026341	chr12	52309008	52310017	+	1009	474	NM_000020	ACVRL1
hsa_circ_0007067	5.04745e-05	3.60999	7.46275	7.30789	7.2828	P	P	P	5.56495	5.45067	5.48612	P	P	P	hsa_circ_0007067	circRNA	TGCCCTCGAGCTCACTACCCTGGGAAATCTTACACCTTCAAGCACTGTGTTTTTCTGCTG	NA	NA	NA	NA	NA	NA	NA	NA	NA	NA	NA	---	NA	NA	hsa_circ_0007067	chr5	128440648	128442755	+	2107	441	NM_016048	ISOC1
hsa_circ_0063388	1.62924e-05	3.6075	7.67891	7.57495	7.51661	P	P	P	5.77971	5.67461	5.76562	P	P	P	hsa_circ_0063388	circRNA	TTACACATTGTGATATTAACTGTTCTCCATAGTGGTGTTCGGCTCCATCGTGAACGAGGG	NA	NA	NA	NA	NA	NA	NA	NA	NA	NA	NA	PHGDH	NA	NA	hsa_circ_0063388	chr22	39770320	39827887	+	57567	50571	NM_004711	SYNGR1
hsa_circ_0013120	0.00112985	3.60407	5.59402	5.44304	5.23272	P	P	P	3.84196	3.55014	3.30042	P	P	P	hsa_circ_0013120	circRNA	ACTTAAAATAGTCATGCAAGACAAGATAATCTGCCTTCCGAAAAGAGTGCAGCCTGCTCA	NA	NA	NA	NA	NA	NA	NA	NA	NA	NA	NA	---	NA	NA	hsa_circ_0013120	chr1	90178267	90185094	+	6827	6827	NM_032270	LRRC8C
hsa_circ_0069361	2.20829e-05	3.60295	7.20231	7.00782	7.09858	P	P	P	5.14031	5.28577	5.33466	P	P	P	hsa_circ_0069361	circRNA	CTCAGCCCTGATAGTAGTAACCACTAGCATTGGACAGGATTTGAAAAGCTACCACAATCA	NA	NA	NA	NA	NA	NA	NA	NA	NA	NA	NA	LRP8	NA	NA	hsa_circ_0069361	chr4	25759309	25831778	-	72469	2088	NM_015187	SEL1L3
hsa_circ_0069365	0.000169538	3.59833	6.79127	6.57337	6.46056	P	P	P	4.7501	4.93119	4.60294	P	P	P	hsa_circ_0069365	circRNA	CACACTGCAAGGAGATCAGGGCATGTTGTATAGTTTGGTTGGAGGCCAGGGGAGTGAGAG	NA	NA	NA	NA	NA	NA	NA	NA	NA	NA	NA	LRP8	NA	NA	hsa_circ_0069365	chr4	25803904	25804084	-	180	180	NM_015187	SEL1L3
hsa_circ_0044399	0.0470074	3.59766	3.58308	3.69145	3.75607	P	P	P	2.43542	1.78132	0.872673	A	A	A	hsa_circ_0044399	circRNA	TGCCATGAGCGTTGCAAGACCTTACCCTTTACAACCCTGAGAGGACCATCACTGTGAAGG	NA	NA	NA	NA	NA	NA	NA	NA	NA	NA	NA	---	NA	NA	hsa_circ_0044399	chr17	47119603	47119739	+	136	136	NM_006546	IGF2BP1
hsa_circ_0042504	0.0421369	3.59709	3.70224	3.19917	3.62846	P	P	P	2.17516	0.614334	1.83298	A	A	A	hsa_circ_0042504	circRNA	ATGCATTTGGGCGAAGCTGGTCCGTTACATTTGTAAGCAGAGGCAGTGCAAGCTGAGCGT	NA	NA	NA	NA	NA	NA	NA	NA	NA	NA	NA	---	NA	NA	hsa_circ_0042504	chr17	25877593	25937224	+	59631	2192	NM_014238	KSR1
hsa_circ_0036080	0.00157282	3.59537	6.79198	6.66806	6.65108	P	P	P	5.02161	4.90434	4.62224	P	P	P	hsa_circ_0036080	circRNA	TTCAGCCTGGGTTCTTTGCATGGAGGTTTGTGACTGCACTGTATATGACAGACATCAAGA	NA	NA	NA	NA	NA	NA	NA	NA	NA	NA	NA	C3H7orf43	NA	NA	hsa_circ_0036080	chr15	69677015	69677221	+	206	206	NM_001104554	PAQR5
hsa_circ_0062730	0.00101969	3.59212	5.75762	5.32972	5.55099	P	P	P	3.79759	3.73949	3.59054	P	P	P	hsa_circ_0062730	circRNA	TTATACCAAGTTTGCTGGGATGGAGTCAGGCTATGCTTGCTTCTGTGGAAACAATCCTGA	NA	NA	NA	NA	NA	NA	NA	NA	NA	NA	NA	---	NA	NA	hsa_circ_0062730	chr22	29521250	29533662	+	12412	487	NM_001039570	KREMEN1
hsa_circ_0045781	0.0394848	3.59126	3.52332	2.84609	2.90612	P	P	P	1.841	1.35329	0.206283	A	A	A	hsa_circ_0045781	circRNA	AAGCCTGGTCAATATCCGAAAGGACACACTGAGGCTCGTCAAGCGGCCGCGGTGAAGCGC	NA	NA	NA	NA	NA	NA	NA	NA	NA	NA	NA	Kcnd3	NA	NA	hsa_circ_0045781	chr17	74169782	74236390	-	66608	365	NM_052916	RNF157
hsa_circ_0071002	0.0188732	3.59114	4.90231	4.95357	4.86013	P	P	P	2.62922	2.86605	3.53181	P	P	P	hsa_circ_0071002	circRNA	TTTGATTCTGGAAGATGGGAAATTGAAGAGTTGAAAGAAAACCAGGTACCTGGTGACAGA	NA	NA	NA	NA	NA	NA	NA	NA	NA	NA	NA	---	NA	NA	hsa_circ_0071002	chr4	141323138	141327237	-	4099	224	NM_001130675	CLGN
hsa_circ_0004331	0.0126731	3.58951	5.70349	6.41111	6.39461	P	P	P	4.35881	4.45386	4.2654	P	P	P	hsa_circ_0004331	circRNA	TCACTATATGCTATCCAGAATATGCAGGATGATGCACGCCAACTCTTTGTGCTAGCTGGA	NA	NA	NA	NA	NA	NA	NA	NA	NA	NA	NA	---	NA	NA	hsa_circ_0004331	chr7	79828540	79842185	+	13645	571	NM_002069	GNAI1
hsa_circ_0077970	0.000137699	3.5886	5.97698	5.84461	6.15669	P	P	P	4.15078	4.03471	4.27001	P	P	P	hsa_circ_0077970	circRNA	CAGCTATGTTCAAGTATGACTATGAATATGATGAAAATGGTGACAGAGTCGTTTTAGGAA	NA	NA	NA	NA	NA	NA	NA	NA	NA	NA	NA	---	NA	NA	hsa_circ_0077970	chr6	136926346	136944119	-	17773	663	NM_005923	MAP3K5
hsa_circ_0019777	0.00591738	3.58844	3.19284	3.82871	4.05069	P	P	P	2.28365	1.65313	1.63774	A	A	A	hsa_circ_0019777	circRNA	CCTTTCGGATCTGCAGTTTGTTAAGGGGAAAGTGGAAGTTGAAGCTGGGAAAGAAGGTAT	NA	NA	NA	NA	NA	NA	NA	NA	NA	NA	NA	---	NA	NA	hsa_circ_0019777	chr10	104828385	104836027	+	7642	345	NM_017649	CNNM2
hsa_circ_0087726	0.00721612	3.58703	4.71381	4.79576	4.5315	P	P	P	2.5416	2.64605	3.23645	A	P	P	hsa_circ_0087726	circRNA	AGAACACTGAGTGCAAAGAGAAGAAATATGATTATGATAATTTGCCCAGGACATCTGTTA	NA	NA	NA	NA	NA	NA	NA	NA	NA	NA	NA	---	NA	NA	hsa_circ_0087726	chr9	101585537	101612363	+	26826	2364	NM_024642	GALNT12
hsa_circ_0029923	0.000342661	3.5801	4.61541	4.36926	4.30137	P	P	P	2.36786	2.77558	2.61297	A	P	P	hsa_circ_0029923	circRNA	GCAGCCTCAGATTAAAAAAGTGGCAATATACTTGTGCCGTAACAACACCATTCAAACCAT	NA	NA	NA	NA	NA	NA	NA	NA	NA	NA	NA	---	NA	NA	hsa_circ_0029923	chr13	32785002	32785171	+	169	169	NM_023037	FRY
hsa_circ_0087307	0.000357009	3.57991	10.3664	10.209	10.2269	P	P	P	8.4428	8.57324	8.25392	P	P	P	hsa_circ_0087307	circRNA	GTACCAATAATCCAAAGAGTCCTCGTCAGTGCTTAGCTGTGACATCTCTGTGGATGATAA	NA	NA	NA	NA	NA	NA	NA	NA	NA	NA	NA	Rere	NA	NA	hsa_circ_0087307	chr9	84198597	84199220	-	623	623	NM_005077	TLE1
hsa_circ_0061709	0.000771509	3.57561	6.56607	6.21547	6.17522	P	P	P	4.35183	4.52463	4.58834	P	P	P	hsa_circ_0061709	circRNA	AAAGTATTTTGTTTATATAAGGACTCCCAAAGACCACGACTCCCCTGAGAACGGTGCGGA	NA	NA	NA	NA	NA	NA	NA	NA	NA	NA	NA	---	NA	NA	hsa_circ_0061709	chr21	40191426	40196878	+	5452	2664	NM_005239	ETS2
hsa_circ_0003570	0.00234269	3.57488	6.09492	6.73791	6.34382	P	P	P	4.6602	4.71564	4.33185	P	P	P	hsa_circ_0003570	circRNA	GATGGCACAGCACACGCCAAAGAAGATGAGTCAAGGACCTACACTTTTCTCTTGTGGAAT	NA	NA	NA	NA	NA	NA	NA	NA	NA	NA	NA	---	NA	NA	hsa_circ_0003570	chr10	126370175	126384781	-	14606	828	NM_014661	FAM53B
hsa_circ_0047955	0.0181888	3.57241	4.75376	5.52124	5.10063	P	P	P	3.95864	2.92961	2.77518	P	P	P	hsa_circ_0047955	circRNA	CTTTTAAAAATATATTTGGCTTTTAAAGTATGCATTGGTGGACCAACTGGGTGATCCCTG	NA	NA	NA	NA	NA	NA	NA	NA	NA	NA	NA	---	NA	NA	hsa_circ_0047955	chr18	71920526	71920900	-	374	374	NM_001914	CYB5A
hsa_circ_0073383	3.75559e-05	3.56859	6.36155	6.34912	6.16034	P	P	P	4.52549	4.32456	4.51484	P	P	P	hsa_circ_0073383	circRNA	TGCTTTTGTGGTGAAAGCCAGCTTACGAACATTAATACCCAAAGAACAGAAGTACATTGA	NA	NA	NA	NA	NA	NA	NA	NA	NA	NA	NA	---	NA	NA	hsa_circ_0073383	chr5	94204037	94206196	-	2159	195	NM_024717	MCTP1
hsa_circ_0055000	0.00297353	3.56777	7.82226	7.69516	7.73556	P	P	P	5.74472	5.80248	6.16648	P	P	P	hsa_circ_0055000	circRNA	AACCGAGCAGGTACACGAATTATGTGACAATTTCTGCCACCGGTATATTAGCTGTTTGAA	NA	NA	NA	NA	NA	NA	NA	NA	NA	NA	NA	---	NA	NA	hsa_circ_0055000	chr2	66670033	66794643	+	124610	541	NM_002398	MEIS1
hsa_circ_0022215	0.0384123	3.56282	2.98703	2.70221	3.00999	P	P	P	0.406111	0.628133	1.78336	A	A	A	hsa_circ_0022215	circRNA	TTGGGCCCACAGATGCCCTTTCAAGGGCGACAGCTACAGAACCCAAATGGTAGCCTTGGA	NA	NA	NA	NA	NA	NA	NA	NA	NA	NA	NA	---	NA	NA	hsa_circ_0022215	chr11	60641106	60642721	+	1615	344	NM_207341	ZP1
hsa_circ_0092270	6.34993e-05	3.5622	6.81827	6.62083	6.56693	P	P	P	4.71541	4.9385	4.85735	P	P	P	hsa_circ_0092270	circRNA	AACGGAAAAGTTTGTGAATAGCACAATGGAAGAAGCTGGACTTTGTGGGTTAAGAGAGAA	NA	NA	NA	NA	NA	NA	NA	NA	NA	NA	NA	SPATC1	NA	NA	hsa_circ_0092270	chrY	21749095	21761717	+	12622	1053	NR_045128	TXLNG2P
hsa_circ_0079578	0.00431167	3.55953	5.4899	4.7329	4.94676	P	P	P	3.14741	3.05709	3.5331	P	P	P	hsa_circ_0079578	circRNA	TTTAGGTGCAGTTGCCCAGAGAAAAATTCAGGAAATTCTGACTCAGGTAAAGCAGCACCA	NA	NA	NA	NA	NA	NA	NA	NA	NA	NA	NA	---	NA	NA	hsa_circ_0079578	chr7	23349827	23352079	-	2252	2252	NM_006547	IGF2BP3
hsa_circ_0006834	0.0140426	3.55514	5.09319	4.71211	4.73567	P	P	P	3.56143	2.64782	2.67707	P	P	P	hsa_circ_0006834	circRNA	TCCATTATTTCATTCCTCTGAATATTGATTTGCTGAATAGCCCAGACTTATTGGAAGCAA	NA	NA	NA	NA	NA	NA	NA	NA	NA	NA	NA	---	NA	NA	hsa_circ_0006834	chr2	120885263	120932576	+	47313	958	NM_020909	EPB41L5
hsa_circ_0046332	0.0418357	3.54966	7.07241	8.29491	8.21615	P	P	P	6.27895	5.95791	6.13662	P	P	P	hsa_circ_0046332	circRNA	AACCGCATGTGATCTCCAGGAAGTGGACCTCCCAGGACAGCCTGCTAGGTATGGAGTTCT	NA	NA	NA	NA	NA	NA	NA	NA	NA	NA	NA	---	NA	NA	hsa_circ_0046332	chr17	80036213	80042260	-	6047	3573	NM_004104	FASN
hsa_circ_0087337	5.08701e-05	3.54946	6.93351	6.68481	6.82928	P	P	P	5.11331	4.89231	4.961	P	P	P	hsa_circ_0087337	circRNA	GATTGAATACGATTTGTGCACAAGTCATCCCATTTCTGTCTCAGGAAACTGAAATCGCCA	NA	NA	NA	NA	NA	NA	NA	NA	NA	NA	NA	Rev3l	NA	NA	hsa_circ_0087337	chr9	84268888	84268951	-	63	63	NM_005077	TLE1
hsa_circ_0077887	0.000414299	3.54916	7.01364	6.72173	6.74032	P	P	P	4.92138	5.09236	4.99328	P	P	P	hsa_circ_0077887	circRNA	TACCAAATGCCAGTAATTACAAGTAGTGGCTACAGCCCCAGATCAGCACATCAGTATTCC	NA	NA	NA	NA	NA	NA	NA	NA	NA	NA	NA	---	NA	NA	hsa_circ_0077887	chr6	133782251	133783902	+	1651	354	NM_004100	EYA4
hsa_circ_0022387	0.00128551	3.54915	9.60269	9.33044	9.59668	P	P	P	7.64285	7.69001	7.72961	P	P	P	hsa_circ_0022387	circRNA	ATGGCAGCCCATCGAGGGTGCCTCTGCCAACTGGTGGAATCATCGCCACTTCCAGCACCA	NA	NA	NA	NA	NA	NA	NA	NA	NA	NA	NA	---	NA	NA	hsa_circ_0022387	chr11	61615630	61615756	+	126	126	NM_004265	FADS2
hsa_circ_0022393	0.000626607	3.54722	8.80018	8.44902	8.74624	P	P	P	6.88035	6.73075	6.92155	P	P	P	hsa_circ_0022393	circRNA	ACATCATCAGGACCTGGCCTGGGCCGTCAGCTACTACATCCGGTTCTTCATCACCTACAT	NA	NA	NA	NA	NA	NA	NA	NA	NA	NA	NA	---	NA	NA	hsa_circ_0022393	chr11	61630443	61632749	+	2306	401	NM_004265	FADS2
hsa_circ_0049239	0.00442129	3.53866	6.85014	7.26306	7.38899	P	P	P	5.38191	5.25938	5.43881	P	P	P	hsa_circ_0049239	circRNA	TTTGTGTTAGTTAATAAAGCTTTCTCAACTGCCGCTTTCCGGCGCCCAACGTGATTCTGA	NA	NA	NA	NA	NA	NA	NA	NA	NA	NA	NA	---	NA	NA	hsa_circ_0049239	chr19	10395078	10397291	+	2213	2002	NM_000201	ICAM1
hsa_circ_0084863	0.0164947	3.53714	6.04729	7.00122	6.91434	P	P	P	4.99068	4.62096	5.0275	P	P	P	hsa_circ_0084863	circRNA	ACCTGGTGGGGCTTGGCATAAACTATAGTGACACTGAAACTGAAGGAGAGATTTTTAATT	NA	NA	NA	NA	NA	NA	NA	NA	NA	NA	NA	bcr	NA	NA	hsa_circ_0084863	chr8	90921794	90926974	+	5180	484	NM_001126111	OSGIN2
hsa_circ_0047302	0.000186466	3.53503	9.18148	8.99509	8.97076	P	P	P	7.32286	7.31448	7.03612	P	P	P	hsa_circ_0047302	circRNA	CACCTTCAAGTGTCCAGTCTGCTTTACAGATGAAGGACTGAACCATGAATGCAAACTCTG	NA	NA	NA	NA	NA	NA	NA	NA	NA	NA	NA	---	NA	NA	hsa_circ_0047302	chr18	22671913	22672045	-	132	132	NM_015461	ZNF521
hsa_circ_0001991	0.0248141	3.52805	3.92058	4.12426	4.12929	P	P	P	2.71838	2.2068	1.58381	P	A	A	hsa_circ_0001991	circRNA	ACCAAGCCAGGCACCTCTGATCACAGCCTAAGAGCATGTAAGGTTCTCTGGAAGGATTTG	NA	NA	NA	NA	NA	NA	NA	NA	NA	NA	NA	hectd1	NA	NA	hsa_circ_0001991	chr5	80299959	80338802	+	38843	38843	NM_006909	RASGRF2
hsa_circ_0085514	0.00825049	3.5271	5.73134	6.53555	6.47151	P	P	P	4.73506	4.32702	4.30895	P	P	P	hsa_circ_0085514	circRNA	GGACATGCAAATAAAATGAAGAATGAAATCACCTGAAAGAACCATTCTTAGAAGCCACTG	NA	NA	NA	NA	NA	NA	NA	NA	NA	NA	NA	nup93	NA	NA	hsa_circ_0085514	chr8	126023778	126034525	+	10747	955	NM_003129	SQLE
hsa_circ_0025079	0.0454033	3.52313	3.32718	3.24671	3.49282	P	P	P	1.81	0.539059	1.91793	A	A	A	hsa_circ_0025079	circRNA	AGGTGGATATCCACTACTGCCAGCCCGGGAAGACTGTGATGATCGATGTGTGCACGACCT	NA	NA	NA	NA	NA	NA	NA	NA	NA	NA	NA	Ush2a	NA	NA	hsa_circ_0025079	chr12	6058951	6076768	-	17817	483	NM_000552	VWF
hsa_circ_0074940	0.00202023	3.52122	5.7561	5.16315	5.35239	P	P	P	3.26152	3.67162	3.8869	P	P	P	hsa_circ_0074940	circRNA	TAAAAAGCAAGACTGGTATAGGGGATACCTCATAAAGCACAAAATGTTACAGGGCATTTT	NA	NA	NA	NA	NA	NA	NA	NA	NA	NA	NA	---	NA	NA	hsa_circ_0074940	chr5	169096291	169188629	+	92338	2427	NM_004946	DOCK2
hsa_circ_0073779	0.000548469	3.51537	7.3709	7.21983	7.29514	P	P	P	5.66308	5.37689	5.39038	P	P	P	hsa_circ_0073779	circRNA	CAGTGTGTCGTTCAGCAGTGCAGTGTGAGATGCATGAATGGTGGGACCTGTGCAGATGAC	NA	NA	NA	NA	NA	NA	NA	NA	NA	NA	NA	---	NA	NA	hsa_circ_0073779	chr5	127607690	127863660	-	255970	7524	NM_001999	FBN2
hsa_circ_0074955	0.00104853	3.51479	6.17849	6.01057	5.75682	P	P	P	4.21435	4.25782	4.0566	P	P	P	hsa_circ_0074955	circRNA	TGAACTTGTGAATGCCGGGACATTCTGCTTCCTGTCATCACCAAAGAGCTGAAGGAGCTG	NA	NA	NA	NA	NA	NA	NA	NA	NA	NA	NA	---	NA	NA	hsa_circ_0074955	chr5	169230061	169410170	+	180109	344	NM_004946	DOCK2
hsa_circ_0030598	0.0003854	3.5099	7.90197	7.77715	7.53117	P	P	P	6.15112	5.74216	5.8765	P	P	P	hsa_circ_0030598	circRNA	TGTTCGAACTGAAGGAGATTTCCAAGATTCTGAGAAGTTCCTGCCTCAGAGGGATGAATT	NA	NA	NA	NA	NA	NA	NA	NA	NA	NA	NA	---	NA	NA	hsa_circ_0030598	chr13	95829960	95859035	-	29075	816	NM_005845	ABCC4
hsa_circ_0083243	0.000958917	3.5072	4.97777	4.61109	4.46624	P	P	P	3.05727	2.65597	2.9314	P	P	P	hsa_circ_0083243	circRNA	AAACACTTTGCAATTTCAGCATCATAGCTGGGAAACGGATTCACAAGACCCAGGCTGTTC	NA	NA	NA	NA	NA	NA	NA	NA	NA	NA	NA	---	NA	NA	hsa_circ_0083243	chr7_gl000195_random	42937	44923	-	1986	1986	NM_001242480	LOC389831
hsa_circ_0054448	0.0357273	3.50484	6.26884	7.41571	7.24767	P	P	P	5.11647	5.3635	5.25623	P	P	P	hsa_circ_0054448	circRNA	TATCTTATTAAAGTATTCTGATCCTACCACTGGGAATCAGAACTTCGAGGAGTCCTCAGC	NA	NA	NA	NA	NA	NA	NA	NA	NA	NA	NA	---	NA	NA	hsa_circ_0054448	chr2	46605032	46613842	+	8810	3407	NM_001430	EPAS1
hsa_circ_0061179	0.036171	3.5041	4.36641	4.14877	4.1031	P	P	P	3.02489	1.65398	2.19108	P	A	A	hsa_circ_0061179	circRNA	CGAGACTCAAAGTCTGTAGAAGAGGCGACACCAGGGCTTCCAAATGAACAACCGAAAGGA	NA	NA	NA	NA	NA	NA	NA	NA	NA	NA	NA	zgc:174574	NA	NA	hsa_circ_0061179	chr20	62421173	62422143	-	970	970	NM_025224	ZBTB46
hsa_circ_0016909	0.000233449	3.50194	5.3016	4.98632	5.02403	P	P	P	3.16631	3.3262	3.40574	P	P	P	hsa_circ_0016909	circRNA	GCATTTGAAGTGGTTCTCACCATTCAGGAAGCCCTTCAGCTCACTGTTCAAAAAGTAGTG	NA	NA	NA	NA	NA	NA	NA	NA	NA	NA	NA	MGC86324	NA	NA	hsa_circ_0016909	chr1	232551239	232568217	-	16978	731	NM_020808	SIPA1L2
hsa_circ_0076703	0.0306682	3.49712	3.79217	3.75281	4.08485	P	P	P	1.23403	2.43875	2.29118	A	P	A	hsa_circ_0076703	circRNA	AGAAATGGATCTACTACTGCAATGGCCATGGCATGAACTCAACAGAATCCAACTCTTCTG	NA	NA	NA	NA	NA	NA	NA	NA	NA	NA	NA	RYR2	NA	NA	hsa_circ_0076703	chr6	47251673	47252168	-	495	495	NM_014452	TNFRSF21
hsa_circ_0073784	0.00119373	3.49701	6.58049	6.11534	6.53998	P	P	P	4.51187	4.5308	4.80068	P	P	P	hsa_circ_0073784	circRNA	AAGGCTGTGTAGATCAGAGAACAGGCATGTGTTTCTCGGGCCTGGTGAATGGCCGCTGTG	NA	NA	NA	NA	NA	NA	NA	NA	NA	NA	NA	---	NA	NA	hsa_circ_0073784	chr5	127622409	127730967	-	108558	5934	NM_001999	FBN2
hsa_circ_0025758	0.000902347	3.49682	8.62683	8.3755	8.25952	P	P	P	6.53395	6.62319	6.7062	P	P	P	hsa_circ_0025758	circRNA	AGCTTAGCTTCGTTATTGGCTGAGCAGGTGGCTGGGATCGTTGGCAGAGCGGACGTGTTA	NA	NA	NA	NA	NA	NA	NA	NA	NA	NA	NA	RSP5	NA	NA	hsa_circ_0025758	chr12	29689141	29911710	-	222569	1305	NM_175861	TMTC1
hsa_circ_0012004	0.0016094	3.49644	6.23524	6.19101	6.52726	P	P	P	4.5519	4.55406	4.45114	P	P	P	hsa_circ_0012004	circRNA	TCATCAACCGCAACGAGGAGAACCGGGCCAAGAGTGAAGCTGACGGGTCGCCTCATGCTG	NA	NA	NA	NA	NA	NA	NA	NA	NA	NA	NA	MIR370	NA	NA	hsa_circ_0012004	chr1	43395543	43408992	-	13449	661	NM_006516	SLC2A1
hsa_circ_0072453	0.000490658	3.49542	6.43259	6.49482	6.15628	P	P	P	4.525	4.48276	4.67444	P	P	P	hsa_circ_0072453	circRNA	ACTGGGGTGCAAACAGACAAGGTGACTTTTACTATTAACTTTGACTTCAATCTTCAAAAC	NA	NA	NA	NA	NA	NA	NA	NA	NA	NA	NA	---	NA	NA	hsa_circ_0072453	chr5	52370890	52376451	+	5561	375	NM_002203	ITGA2
hsa_circ_0066428	0.0102357	3.49273	4.26013	4.2385	4.35212	P	P	P	2.38149	2.14149	2.83084	A	A	P	hsa_circ_0066428	circRNA	CTAAACCAACCTGGACAATCCAGATGAGCAAGCAGCCCAGATCAGACGAGAGCTGGATGG	NA	NA	NA	NA	NA	NA	NA	NA	NA	NA	NA	---	NA	NA	hsa_circ_0066428	chr3	62631396	62648069	-	16673	437	NM_003716	CADPS
hsa_circ_0032038	0.000424196	3.4896	5.33837	5.13173	5.25902	P	P	P	3.27368	3.62739	3.40396	P	P	P	hsa_circ_0032038	circRNA	AGGAAAGCTGGTACAATGGTGCTTTACCCAATGGAGATAGAGGACGGAGGAAAAGTAGAT	NA	NA	NA	NA	NA	NA	NA	NA	NA	NA	NA	Cep72	NA	NA	hsa_circ_0032038	chr14	56645052	56757174	+	112122	619	NM_021255	PELI2
hsa_circ_0025442	0.0189631	3.4883	3.91897	3.78819	3.92939	P	P	P	1.79727	1.70177	2.56943	A	A	P	hsa_circ_0025442	circRNA	AAGAAGGAACAGGTCCCAAAGTCTTCATCCAATGAGGAGGTAATGTTCCTCACTGTCCAA	NA	NA	NA	NA	NA	NA	NA	NA	NA	NA	NA	---	NA	NA	hsa_circ_0025442	chr12	9259086	9265132	-	6046	724	NM_000014	A2M
hsa_circ_0055855	0.000189021	3.48327	4.56745	4.41769	4.27801	P	P	P	2.42633	2.75992	2.66982	A	P	P	hsa_circ_0055855	circRNA	GCAGGGGGAGGGGTGAAGACATCTTAAACCAGAGGAATGACTCTCTAGTTGTGGAATTTC	NA	NA	NA	NA	NA	NA	NA	NA	NA	NA	NA	---	NA	NA	hsa_circ_0055855	chr2	100623093	100628033	-	4940	895	NM_001025108	AFF3
hsa_circ_0068710	0.032737	3.48208	3.12803	2.80191	2.85727	P	P	P	0.277573	1.32157	1.52753	A	A	A	hsa_circ_0068710	circRNA	CTTGATGAAGGTTGGCAGCAAAGCTGTCCTGGTCACAGGCTGTGACTCTGGATTTGGGTT	NA	NA	NA	NA	NA	NA	NA	NA	NA	NA	NA	---	NA	NA	hsa_circ_0068710	chr3	197259282	197259393	-	111	111	NM_203314	BDH1
hsa_circ_0032226	0.00265748	3.47616	8.73059	8.59111	8.38063	P	P	P	6.76862	6.75447	6.80754	P	P	P	hsa_circ_0032226	circRNA	ATTTGCCAATGGTGCAATAACCACTGCTGACCAACGAGATTCAGTCACTCCTCATCAACT	NA	NA	NA	NA	NA	NA	NA	NA	NA	NA	NA	DDC	NA	NA	hsa_circ_0032226	chr14	65198078	65211060	+	12982	3450	NM_015549	PLEKHG3
hsa_circ_0054999	0.000303303	3.47516	7.91704	7.78745	7.78819	P	P	P	6.14769	5.87002	6.07352	P	P	P	hsa_circ_0054999	circRNA	GCATCTAACAGTACACGAATTATGTGACAATTTCTGCCACCGGTATATTAGCTGTTTGAA	NA	NA	NA	NA	NA	NA	NA	NA	NA	NA	NA	---	NA	NA	hsa_circ_0054999	chr2	66670033	66739426	+	69393	405	NM_002398	MEIS1
hsa_circ_0029431	0.00253594	3.47331	4.47368	4.24076	4.31348	P	P	P	2.83061	2.30894	2.4583	P	A	P	hsa_circ_0029431	circRNA	CCCACACCAAGAAAGCATGCTTTATTGTCTTCAACGCTGCCAAGCCTCTTCATGACATCC	NA	NA	NA	NA	NA	NA	NA	NA	NA	NA	NA	---	NA	NA	hsa_circ_0029431	chr12	131475558	131490592	+	15034	586	NM_198827	GPR133
hsa_circ_0008708	0.0407281	3.4733	3.75715	5.025	4.96103	P	P	P	2.57868	3.0831	2.96096	A	P	P	hsa_circ_0008708	circRNA	TGAAAACCAACAGGAGTACAAAACAGCAGATTTTGACTAAAGGAGAAGTTCAAGTATCAG	NA	NA	NA	NA	NA	NA	NA	NA	NA	NA	NA	ptena	NA	NA	hsa_circ_0008708	chr7	72302181	72302378	+	197	197	TCONS_l2_00026002	TCONS_l2_00026002
hsa_circ_0079214	0.0374399	3.4671	4.70858	4.11191	4.5504	P	P	P	3.34495	1.78241	2.50741	P	A	P	hsa_circ_0079214	circRNA	CCAGCCGAGGATGATGTTGCTCCATATTTTAAAACGGAGCCAGGCCTACCACAGATCCAC	NA	NA	NA	NA	NA	NA	NA	NA	NA	NA	NA	LOC523427	NA	NA	hsa_circ_0079214	chr7	3658711	4259902	+	601191	5403	NM_152744	SDK1
hsa_circ_0055002	0.000162827	3.46414	7.22669	7.02251	6.90219	P	P	P	5.08317	5.35804	5.33568	P	P	P	hsa_circ_0055002	circRNA	GCATCTAACACCCTCTTGGAACAGAGATCATGATGACACGGCATCTACTCGTTCAGGAGG	NA	NA	NA	NA	NA	NA	NA	NA	NA	NA	NA	---	NA	NA	hsa_circ_0055002	chr2	66691240	66739426	+	48186	258	NM_002398	MEIS1
hsa_circ_0024163	0.00670269	3.46079	5.44307	5.44986	5.42029	P	P	P	3.93056	3.46172	3.49932	P	P	P	hsa_circ_0024163	circRNA	TGGCTATAAGATTGATTGTGGAATATAAGGATATTGCCAGCATTCATTGGGACTGGAAAA	NA	NA	NA	NA	NA	NA	NA	NA	NA	NA	NA	MIR487A	NA	NA	hsa_circ_0024163	chr11	107673726	107675496	-	1770	208	NM_017515	SLC35F2
hsa_circ_0047139	0.00361113	3.45911	7.55765	7.49065	7.52572	P	P	P	5.7498	5.50685	5.91767	P	P	P	hsa_circ_0047139	circRNA	GAATGCTCTGATGTCGAACTCTCTCAGGTTCACCCAGACCAAAGAATTTTAAGAAGATTC	NA	NA	NA	NA	NA	NA	NA	NA	NA	NA	NA	---	NA	NA	hsa_circ_0047139	chr18	20774411	20840434	+	66023	4088	NM_001100619	CABLES1
hsa_circ_0069368	7.18295e-05	3.45818	6.79144	6.63887	6.55484	P	P	P	4.91128	4.93042	4.77877	P	P	P	hsa_circ_0069368	circRNA	TCAGCTGCAGATTTTTAATCCCCTCCTTGAGAAGCAACTTGCTGAACAAATCAAGTTATA	NA	NA	NA	NA	NA	NA	NA	NA	NA	NA	NA	Lrpprc	NA	NA	hsa_circ_0069368	chr4	25806162	25821562	-	15400	486	NM_015187	SEL1L3
hsa_circ_0021535	0.0139366	3.45656	3.12788	4.23316	3.78906	P	P	P	1.58456	2.42128	1.85336	A	P	A	hsa_circ_0021535	circRNA	GTTCAGCCTATTCCTTGTTGTATATAATGAACAGATTCGTGATCTCTTAGTAAATTCAGG	NA	NA	NA	NA	NA	NA	NA	NA	NA	NA	NA	---	NA	NA	hsa_circ_0021535	chr11	28080472	28113060	-	32588	1465	NM_031217	KIF18A
hsa_circ_0071985	0.0104598	3.44251	5.69721	6.33386	6.5506	P	P	P	4.53969	4.57841	4.21599	P	P	P	hsa_circ_0071985	circRNA	CCAGATGAGAAGATATTCAAAGAGACAGGGAAGGATTAGTGTGGGAAGATATTGACTGGA	NA	NA	NA	NA	NA	NA	NA	NA	NA	NA	NA	---	NA	NA	hsa_circ_0071985	chr5	16681417	16763656	-	82239	2957	NM_012334	MYO10
hsa_circ_0069371	0.000624686	3.44234	6.96878	6.83548	6.93006	P	P	P	5.21447	5.2137	4.94256	P	P	P	hsa_circ_0069371	circRNA	CTGCTGACCGATAGTAGTAACCACTAGCATTGGACAGGATTTGAAAAGCTACCACAATCA	NA	NA	NA	NA	NA	NA	NA	NA	NA	NA	NA	lrrc1	NA	NA	hsa_circ_0069371	chr4	25819759	25831778	-	12019	466	NM_015187	SEL1L3
hsa_circ_0069366	0.000103091	3.4403	7.30484	7.12182	7.06481	P	P	P	5.41001	5.22126	5.50898	P	P	P	hsa_circ_0069366	circRNA	AGGAGATCAGATAGTAGTAACCACTAGCATTGGACAGGATTTGAAAAGCTACCACAATCA	NA	NA	NA	NA	NA	NA	NA	NA	NA	NA	NA	LRP8	NA	NA	hsa_circ_0069366	chr4	25803904	25831778	-	27874	858	NM_015187	SEL1L3
hsa_circ_0084108	0.00121048	3.44016	7.65868	8.06712	8.0729	P	P	P	6.31169	6.07546	6.08953	P	P	P	hsa_circ_0084108	circRNA	CCAGCTTCACTTCAGAATCAACCAAACAGGATATTGTACTAAATGAAGTTAAAAAAGTGG	NA	NA	NA	NA	NA	NA	NA	NA	NA	NA	NA	Dlgap2	NA	NA	hsa_circ_0084108	chr8	42214837	42218883	+	4046	144	NM_002690	POLB
hsa_circ_0077960	0.00179877	3.44016	4.52005	4.3804	4.80791	P	P	P	2.83672	2.85727	2.69503	P	P	P	hsa_circ_0077960	circRNA	ACTCTCAACACTCTTTCAGCTGGATCAAATGAATATCTCAGGAGTATATCCTTGCCGGTA	NA	NA	NA	NA	NA	NA	NA	NA	NA	NA	NA	---	NA	NA	hsa_circ_0077960	chr6	136878186	136922180	-	43994	1977	NM_005923	MAP3K5
hsa_circ_0002805	0.000261203	3.43969	4.68539	4.40337	4.55203	P	P	P	2.95724	2.73184	2.59527	P	P	P	hsa_circ_0002805	circRNA	TCGCTGTCCCAGTCTGTAGAAGAGGCGACACCAGGGCTTCCAAATGAACAACCGAAAGGA	NA	NA	NA	NA	NA	NA	NA	NA	NA	NA	NA	zgc:174288	NA	NA	hsa_circ_0002805	chr20	62407030	62422143	-	15113	1255	NM_025224	ZBTB46
hsa_circ_0044389	0.0463762	3.43232	3.32814	2.62683	3.17025	P	P	P	1.2945	0.194218	1.9074	A	A	A	hsa_circ_0044389	circRNA	CAGCCTGCTGGCTCAGTATGGTACAGTAGAGAACTGTGAGCAAGGAGCCGGAAAATTCAA	NA	NA	NA	NA	NA	NA	NA	NA	NA	NA	NA	---	NA	NA	hsa_circ_0044389	chr17	47102979	47103879	+	900	101	NM_006546	IGF2BP1
hsa_circ_0025322	0.025286	3.43166	3.88463	4.62468	4.85218	P	P	P	2.73209	3.26333	1.87329	A	P	A	hsa_circ_0025322	circRNA	AGAAGTTAAAGAAGATGGAATAATCCATTTCCCTGGCTGCCAGGCTCATTCAAGAGAGCC	NA	NA	NA	NA	NA	NA	NA	NA	NA	NA	NA	---	NA	NA	hsa_circ_0025322	chr12	7086295	7086687	-	392	288	NM_005768	LPCAT3
hsa_circ_0029432	0.00225982	3.43141	4.4905	4.32748	4.37908	P	P	P	2.35339	2.77952	2.6981	A	P	P	hsa_circ_0029432	circRNA	CCCGCTGGAGGAAAGCATGCTTTATTGTCTTCAACGCTGCCAAGCCTCTTCATGACATCC	NA	NA	NA	NA	NA	NA	NA	NA	NA	NA	NA	---	NA	NA	hsa_circ_0029432	chr12	131475558	131569208	+	93650	926	NM_198827	GPR133
hsa_circ_0077993	0.0335507	3.43096	3.94898	5.23873	5.16538	P	P	P	3.33751	3.32784	2.54019	P	P	P	hsa_circ_0077993	circRNA	CATACCTATGCTATTAGGAGGGTGAAAGTGATCAGACTCTGAGAATATGGGATGTGAAGG	NA	NA	NA	NA	NA	NA	NA	NA	NA	NA	NA	CG10576	NA	NA	hsa_circ_0077993	chr6	137187764	137191141	+	3377	221	NM_000288	PEX7
hsa_circ_0073381	7.96279e-05	3.4278	5.35758	5.50425	5.37516	P	P	P	3.541	3.76865	3.58992	P	P	P	hsa_circ_0073381	circRNA	ACGTGATACAGAACTTTCAGAAAATGAAGTGGTTGGATCTTATTTCTCTGTGAAGTCTCT	NA	NA	NA	NA	NA	NA	NA	NA	NA	NA	NA	---	NA	NA	hsa_circ_0073381	chr5	94134717	94259726	-	125009	1344	NM_024717	MCTP1
hsa_circ_0043657	0.00562735	3.42747	4.77251	4.30301	4.81322	P	P	P	3.15761	2.98378	2.35109	P	P	A	hsa_circ_0043657	circRNA	AGAAAATAAAAATAACACAGATGCGGCAACCATCGGCTTGATCAGGAATCTGGCCCTGTG	NA	NA	NA	NA	NA	NA	NA	NA	NA	NA	NA	---	NA	NA	hsa_circ_0043657	chr17	39910858	39915122	-	4264	1878	NM_002230	JUP
hsa_circ_0077725	0.00976429	3.42493	6.41048	7.16349	7.1375	P	P	P	4.94436	5.24147	5.29222	P	P	P	hsa_circ_0077725	circRNA	ATAAACATTTTGTTTCCTTGACGTTAATCTGGCCCCTCTGTGGAGGAGCTGGAAAGAGAG	NA	NA	NA	NA	NA	NA	NA	NA	NA	NA	NA	---	NA	NA	hsa_circ_0077725	chr6	117881432	117898634	-	17202	3923	NM_020399	GOPC
hsa_circ_0050098	0.015423	3.42268	4.4019	4.01506	4.27431	P	P	P	2.6425	1.8228	2.75959	A	A	P	hsa_circ_0050098	circRNA	GACCACCTTGATGGCATCCGCCACAGACTCGCGCTATGGGCAGAAGGAGTCCTCGGATCA	NA	NA	NA	NA	NA	NA	NA	NA	NA	NA	NA	Gp1ba	NA	NA	hsa_circ_0050098	chr19	18309534	18313550	-	4016	472	NM_002866	RAB3A
hsa_circ_0001806	0.0457619	3.41953	7.39405	8.49173	8.62656	P	P	M	6.62633	6.38415	6.45482	P	P	P	hsa_circ_0001806	circRNA	TGTCTCCCAGTGCTCCAGACAATGAAACATCCAAATCTGCTAATCAAGATACCTGTAGTC	NA	NA	NA	NA	NA	NA	NA	NA	NA	NA	NA	---	NA	NA	hsa_circ_0001806	chr8	68018139	68028357	+	10218	432	NM_024790	CSPP1
hsa_circ_0002886	0.0473964	3.41819	3.03214	3.03578	2.69287	P	P	P	1.61365	0.115476	1.34505	A	A	A	hsa_circ_0002886	circRNA	TAAAACAGATATTACCTACCATTTACAAACCGTGCTATCAAGACTAATCAGGACCTTCTC	NA	NA	NA	NA	NA	NA	NA	NA	NA	NA	NA	rsrc1	NA	NA	hsa_circ_0002886	chr12	83250788	83251359	+	571	571	NM_152588	TMTC2
hsa_circ_0069372	0.000163677	3.416	7.46873	7.35519	7.58921	P	P	P	5.69048	5.76732	5.64524	P	P	P	hsa_circ_0069372	circRNA	CTGCTGACCGAATGTTGTACCATCTTTGGGTAGGCAGACTTCCCTGACGACATCAGTGAT	NA	NA	NA	NA	NA	NA	NA	NA	NA	NA	NA	lrrc1	NA	NA	hsa_circ_0069372	chr4	25819759	25849486	-	29727	1402	NM_015187	SEL1L3
hsa_circ_0074939	0.000231185	3.41528	5.4987	5.24017	5.15732	P	P	P	3.71476	3.41649	3.45254	P	P	P	hsa_circ_0074939	circRNA	AACGCTGCCTACTGGTATAGGGGATACCTCATAAAGCACAAAATGTTACAGGGCATTTTT	NA	NA	NA	NA	NA	NA	NA	NA	NA	NA	NA	---	NA	NA	hsa_circ_0074939	chr5	169096291	169129431	+	33140	1256	NM_004946	DOCK2
hsa_circ_0072447	0.00419534	3.4138	6.00436	5.65095	5.56925	P	P	P	3.99461	4.02505	3.92699	P	P	P	hsa_circ_0072447	circRNA	AATATTTGCCCTGGAAGAATGCAGCACTCAACTGGACATAGTCATAGTGCTGGATGGTTC	NA	NA	NA	NA	NA	NA	NA	NA	NA	NA	NA	---	NA	NA	hsa_circ_0072447	chr5	52161523	52189671	+	28148	594	NM_181501	ITGA1
hsa_circ_0091729	0.0107107	3.41312	6.05784	6.9959	6.70935	P	P	P	5.03247	4.97916	4.54251	P	P	P	hsa_circ_0091729	circRNA	ATATTATACCGATTTGTTCTCTGTCGCCAAGAGATGCACAGTGATCGGTGGCTCTGGATT	NA	NA	NA	NA	NA	NA	NA	NA	NA	NA	NA	AP3B1	NA	NA	hsa_circ_0091729	chrX	152018808	152037907	+	19099	1261	NM_001129765	NSDHL
hsa_circ_0025977	5.15271e-05	3.41052	7.5732	7.63706	7.73316	P	P	P	5.83095	5.91308	5.89266	P	P	P	hsa_circ_0025977	circRNA	CTTCTTGACTGCCATTTTTGGCTACTTGACATTCTATGACCGTGTATGCTTTACCCACCA	NA	NA	NA	NA	NA	NA	NA	NA	NA	NA	NA	MIR518F	NA	NA	hsa_circ_0025977	chr12	46594880	46596872	-	1992	181	NM_030674	SLC38A1
hsa_circ_0077883	0.00460804	3.40951	8.08016	7.92296	7.94642	P	P	P	5.91891	6.203	6.47134	P	P	P	hsa_circ_0077883	circRNA	AATCTAATCTCAGCAGCACATCAGTTACTACAAATGGGACAGGAGTCCGGAGTTTTGGCT	NA	NA	NA	NA	NA	NA	NA	NA	NA	NA	NA	---	NA	NA	hsa_circ_0077883	chr6	133562636	133767892	+	205256	524	NM_004100	EYA4
hsa_circ_0069442	0.00186578	3.40668	9.52496	9.44504	9.4507	P	P	P	7.54612	7.66492	7.88521	P	P	P	hsa_circ_0069442	circRNA	CTTATACAGGACTTCCAATAGTAGTCAGACATTATCATCCTGTCATACTATGGAGCCATG	NA	NA	NA	NA	NA	NA	NA	NA	NA	NA	NA	---	NA	NA	hsa_circ_0069442	chr4	39077584	39082859	+	5275	320	NM_015990	KLHL5
hsa_circ_0073390	0.000671488	3.40206	5.46498	5.30102	5.44281	P	P	P	3.65337	3.63288	3.62863	P	P	P	hsa_circ_0073390	circRNA	GACGTCACTGATTATGCCAAAAACGTTGAATCCTCAGTGGAGGGAACAATTTGATTTTCA	NA	NA	NA	NA	NA	NA	NA	NA	NA	NA	NA	---	NA	NA	hsa_circ_0073390	chr5	94224583	94245086	-	20503	412	NM_024717	MCTP1
hsa_circ_0069369	0.00786321	3.401	7.03489	7.02456	7.05812	P	P	P	5.34151	5.48178	4.94436	P	P	P	hsa_circ_0069369	circRNA	ATTAAATGTTCCTCGGGATCAGCTGCAGAATGTTGTACCATCTTTGGGTAGGCAGACTTC	NA	NA	NA	NA	NA	NA	NA	NA	NA	NA	NA	Lrr1	NA	NA	hsa_circ_0069369	chr4	25806162	25849486	-	43324	1614	NM_015187	SEL1L3
hsa_circ_0025767	0.000529466	3.39311	8.41529	8.31792	8.09043	P	P	P	6.47053	6.74164	6.30918	P	P	P	hsa_circ_0025767	circRNA	CCATGATGAGGTGGCTGGGATCGTTGGCAGAGCGGACGTGTTAGCGTGTCTGCTGTTTCT	NA	NA	NA	NA	NA	NA	NA	NA	NA	NA	NA	Rsph4a	NA	NA	hsa_circ_0025767	chr12	29904598	29911710	-	7112	458	NM_175861	TMTC1
hsa_circ_0054208	0.00558107	3.38807	5.58177	6.29382	6.31274	P	P	P	4.28771	3.96615	4.67779	P	P	P	hsa_circ_0054208	circRNA	TGAGAGAAGAAAAAACACGCTCAGAGATAACCTGATGGCTCCAGAAGTTGCAGCTGTTGA	NA	NA	NA	NA	NA	NA	NA	NA	NA	NA	NA	---	NA	NA	hsa_circ_0054208	chr2	39542450	39553418	-	10968	467	NM_003618	MAP4K3
hsa_circ_0089181	0.022377	3.38768	3.40364	4.44487	4.51623	P	P	P	2.68738	2.5655	1.98064	A	P	A	hsa_circ_0089181	circRNA	CACTATTAAACAGTCTGTTTCCGTACAGGGTCTCTAATAAATTCCCTTAAGCCATCTGGG	NA	NA	NA	NA	NA	NA	NA	NA	NA	NA	NA	Asph	NA	NA	hsa_circ_0089181	chr9	134064439	134109091	+	44652	2995	NM_005085	NUP214
hsa_circ_0070727	0.000851074	3.38553	7.89757	7.50955	7.59355	P	P	P	5.83387	5.86951	6.0401	P	P	P	hsa_circ_0070727	circRNA	AGAAAACAGCATCCAACTGTTACATAACAGGATGGGGTGACACAGGATCAGTACGACTTC	NA	NA	NA	NA	NA	NA	NA	NA	NA	NA	NA	Fbn2	NA	NA	hsa_circ_0070727	chr4	119203985	119259469	-	55484	1818	NM_003619	PRSS12
hsa_circ_0003088	0.000157019	3.38098	4.2675	4.46425	4.55363	P	P	P	2.55827	2.73926	2.72332	P	P	P	hsa_circ_0003088	circRNA	AGAAAAGGATGCTGTCCTATTTGCACTGAAAGGAGGCAGGACACAATGTGTGAGAGAAGT	NA	NA	NA	NA	NA	NA	NA	NA	NA	NA	NA	---	NA	NA	hsa_circ_0003088	chr7	34085917	34101659	+	15742	502	NM_133468	BMPER
hsa_circ_0069445	0.00018937	3.37756	9.48485	9.23877	9.22164	P	P	P	7.46067	7.57737	7.64839	P	P	P	hsa_circ_0069445	circRNA	TGTGGAAAGAACTTCCAATAGTAGTCAGACATTATCATCCTGTCATACTATGGAGCCATG	NA	NA	NA	NA	NA	NA	NA	NA	NA	NA	NA	---	NA	NA	hsa_circ_0069445	chr4	39077584	39114852	+	37268	1518	NM_015990	KLHL5
hsa_circ_0075358	0.0484627	3.37739	2.90952	4.31456	3.95036	P	P	P	1.83204	2.08892	2.28651	A	A	A	hsa_circ_0075358	circRNA	TGCCTTACACGAATTACACATTTGATTTCAAGGCATGCCCAAAGAAAAATACGAGCCCCC	NA	NA	NA	NA	NA	NA	NA	NA	NA	NA	NA	---	NA	NA	hsa_circ_0075358	chr5	179956274	179998432	+	42158	1463	NM_015455	CNOT6
hsa_circ_0022392	0.000502034	3.37508	8.72483	8.53961	8.83344	P	P	P	7.02488	6.9271	6.89303	P	P	P	hsa_circ_0022392	circRNA	TTGAGCACCAGACCTGGCCTGGGCCGTCAGCTACTACATCCGGTTCTTCATCACCTACAT	NA	NA	NA	NA	NA	NA	NA	NA	NA	NA	NA	---	NA	NA	hsa_circ_0022392	chr11	61630443	61631258	+	815	275	NM_004265	FADS2
hsa_circ_0069444	1.54791e-05	3.37505	9.39994	9.2659	9.37677	P	P	P	7.57752	7.51313	7.68548	P	P	P	hsa_circ_0069444	circRNA	CAACAAAAGGACTTCCAATAGTAGTCAGACATTATCATCCTGTCATACTATGGAGCCATG	NA	NA	NA	NA	NA	NA	NA	NA	NA	NA	NA	---	NA	NA	hsa_circ_0069444	chr4	39077584	39098498	+	20914	917	NM_015990	KLHL5
hsa_circ_0003799	0.00576319	3.36747	3.99712	4.65297	4.71743	P	P	P	2.56432	2.38586	3.1512	A	A	P	hsa_circ_0003799	circRNA	CAGACTGGTTTGATAACAAGACAGATCTATACAGATATCAGATATCAGACTCCATTACTT	NA	NA	NA	NA	NA	NA	NA	NA	NA	NA	NA	IGLL1	NA	NA	hsa_circ_0003799	chr6	111665127	111678328	-	13201	466	NM_002912	REV3L
hsa_circ_0072493	0.00164728	3.36442	6.24636	5.79194	6.20376	P	P	P	4.26733	4.49524	4.25782	P	P	P	hsa_circ_0072493	circRNA	AGGAAGGCAGCTTCCATGCCTATGGCTGTTCTAAAATTGGGCCAAATATATCCATTTCAG	NA	NA	NA	NA	NA	NA	NA	NA	NA	NA	NA	DUSP22	NA	NA	hsa_circ_0072493	chr5	54763696	54786942	-	23246	436	NM_176895	PPAP2A
hsa_circ_0006639	0.00047288	3.36359	5.6011	5.73935	5.39994	P	P	P	3.80287	3.6262	4.04977	P	P	P	hsa_circ_0006639	circRNA	TGCTTTTGTGGAACTTTCAGAAAATGAAGTGGTTGGATCTTATTTCTCTGTGAAGTCTCT	NA	NA	NA	NA	NA	NA	NA	NA	NA	NA	NA	---	NA	NA	hsa_circ_0006639	chr5	94204037	94259726	-	55689	1224	NM_024717	MCTP1
hsa_circ_0080427	0.0229975	3.36355	5.53256	6.41083	6.29897	P	P	P	4.45949	4.36823	4.30841	P	P	P	hsa_circ_0080427	circRNA	AGCACTTCCCAGACCCCAGCCATGATAGGCTGCTCGTTCGTGGTCAACAGGAAGTTCTTC	NA	NA	NA	NA	NA	NA	NA	NA	NA	NA	NA	Usp6nl	NA	NA	hsa_circ_0080427	chr7	71036269	71178584	+	142315	2288	NM_022479	WBSCR17
hsa_circ_0049003	0.000328592	3.36287	9.01153	8.73059	9.08789	P	P	P	7.24492	7.30779	7.0387	P	P	P	hsa_circ_0049003	circRNA	TTTCCAGAGAAATAAACTCTTCCCGTCGCTCTGCCATTGTTGAAGACATCAACAAACGGC	NA	NA	NA	NA	NA	NA	NA	NA	NA	NA	NA	pco133717	NA	NA	hsa_circ_0049003	chr19	7704616	7712759	+	8143	1676	NM_006949	STXBP2
hsa_circ_0055034	0.00105558	3.36011	10.5558	10.1866	10.4131	P	P	P	8.64993	8.72129	8.5578	P	P	P	hsa_circ_0055034	circRNA	TATCTCCAGTTCTGTCATCATCACCACCACACACTGTATGAGAAGCCCTTTTCTGTGGAA	NA	NA	NA	NA	NA	NA	NA	NA	NA	NA	NA	---	NA	NA	hsa_circ_0055034	chr2	69350148	69351775	+	1627	149	NM_032208	ANTXR1
hsa_circ_0066556	0.00796623	3.35019	3.97875	3.95895	3.95352	P	P	P	2.28098	1.89582	2.43053	A	A	A	hsa_circ_0066556	circRNA	AGTGAGTCGAAATGCGTCTCTGGAAGTGGCATGATCGCGTCTTCGCCAGGAGGACTTTCC	NA	NA	NA	NA	NA	NA	NA	NA	NA	NA	NA	kiaa0895	NA	NA	hsa_circ_0066556	chr3	77147164	77147491	+	327	327	NM_002942	ROBO2
hsa_circ_0067940	0.00667976	3.35009	2.86693	2.75888	2.67283	P	P	P	1.198	0.633361	1.17386	A	A	A	hsa_circ_0067940	circRNA	AGTATTTCAAGAGAAGGAACCTTGATGATTAGAGAGACCAACAGGAGCTCCAGGCAGCAA	NA	NA	NA	NA	NA	NA	NA	NA	NA	NA	NA	S100pbp	NA	NA	hsa_circ_0067940	chr3	170811627	170811757	-	130	130	NM_015028	TNIK
hsa_circ_0070281	0.0218047	3.34875	5.30379	5.02667	5.24684	P	P	P	3.62139	2.7824	3.77417	P	P	P	hsa_circ_0070281	circRNA	TTACTAAGAGGGTTACCTTGGCTTTCATTGGGATCAGTTTGCTGGTTATAGGAACTACAC	NA	NA	NA	NA	NA	NA	NA	NA	NA	NA	NA	---	NA	NA	hsa_circ_0070281	chr4	84508407	84516113	+	7706	375	NM_032717	AGPAT9
hsa_circ_0056920	0.000973986	3.34468	7.17396	7.21458	7.237	P	P	P	5.46689	5.58705	5.33579	P	P	P	hsa_circ_0056920	circRNA	TGGTGCCCTGGTCTTTACTGGAATCTTTGCAGCTGAAATGGTATTAAAACTGATTGCCAT	NA	NA	NA	NA	NA	NA	NA	NA	NA	NA	NA	LOC105612261	NA	NA	hsa_circ_0056920	chr2	167099011	167134823	-	35812	1284	NM_002977	SCN9A
hsa_circ_0087727	0.000147252	3.34144	7.13285	7.2106	7.30943	P	P	P	5.32537	5.50522	5.59352	P	P	P	hsa_circ_0087727	circRNA	AGAACACTGATTTTTCGAGTACACGTCCCAGAAAGAAATACGCTATAACACCCACCAGCC	NA	NA	NA	NA	NA	NA	NA	NA	NA	NA	NA	---	NA	NA	hsa_circ_0087727	chr9	101608258	101612363	+	4105	1277	NM_024642	GALNT12
hsa_circ_0054288	0.000207704	3.33932	8.14581	8.0361	8.04891	P	P	P	6.38464	6.42105	6.19931	P	P	P	hsa_circ_0054288	circRNA	AGAAGGCCCTCAATAAAGGCTTCCTGAGGAACGCAATATTCCTCCTGCCTGCCAGGGTGC	NA	NA	NA	NA	NA	NA	NA	NA	NA	NA	NA	---	NA	NA	hsa_circ_0054288	chr2	42994228	43010560	-	16332	966	NM_012205	HAAO
hsa_circ_0013502	0.00638601	3.33789	8.12125	8.26962	8.18857	P	P	P	6.59181	6.61889	6.09883	P	P	P	hsa_circ_0013502	circRNA	AGTCTGTGGACATGTAAGGACGAGAGTAAAGAGGAAAATCTTATCGGGAGAACCTGCTTC	NA	NA	NA	NA	NA	NA	NA	NA	NA	NA	NA	---	NA	NA	hsa_circ_0013502	chr1	111729800	111741364	-	11564	1599	NM_024901	DENND2D
hsa_circ_0025759	0.000203161	3.33706	8.03166	7.83424	7.79527	P	P	P	6.29709	6.17231	5.96845	P	P	P	hsa_circ_0025759	circRNA	ATCTCCTCAAATTCCTCACCTATTCCTACCTCTTGGCCTTCAATGTGTGGCTTCTGCTTG	NA	NA	NA	NA	NA	NA	NA	NA	NA	NA	NA	rsp-6	NA	NA	hsa_circ_0025759	chr12	29709789	29786269	-	76480	738	NM_175861	TMTC1
hsa_circ_0029925	0.0243776	3.3367	4.21069	4.01142	3.67094	P	P	P	1.4651	2.30288	2.70141	A	A	P	hsa_circ_0029925	circRNA	TCCATGCCAGAGAGTGTTCACTGGAGAGAAGCTCTGAATATCTTGAAGCTGGTAGTTTCT	NA	NA	NA	NA	NA	NA	NA	NA	NA	NA	NA	---	NA	NA	hsa_circ_0029925	chr13	32821459	32863880	+	42421	1752	NM_023037	FRY
hsa_circ_0055029	0.001211	3.33449	8.47875	8.37166	8.37742	P	P	P	6.66757	6.49694	6.83383	P	P	P	hsa_circ_0055029	circRNA	ATCCACCATATGTGCAGGAGAGAACAAATCCGTCAAGGCCTAGAAGAACTCCAGAAAGTT	NA	NA	NA	NA	NA	NA	NA	NA	NA	NA	NA	---	NA	NA	hsa_circ_0055029	chr2	69297778	69318051	+	20273	407	NM_032208	ANTXR1
hsa_circ_0020958	0.0018712	3.33351	5.63328	5.34308	5.54112	P	P	P	3.44896	3.8918	3.93263	P	P	P	hsa_circ_0020958	circRNA	TCTCTAAGAATCTCCTGGTTGTCTACCCATGGACCTAGAGGTACTTTGAAAGTTTTGGAT	NA	NA	NA	NA	NA	NA	NA	NA	NA	NA	NA	---	NA	NA	hsa_circ_0020958	chr11	5263184	5264558	-	1374	516	NR_001589	HBBP1
hsa_circ_0032222	0.018133	3.32711	4.08664	3.23307	4.03157	P	P	P	2.66765	1.4759	1.89244	A	A	A	hsa_circ_0032222	circRNA	CCGGCTCCAGGAAATTGCCAAGCATTTTGATGAAGAAGAGGATGGCTTTGAGGTGGTGGA	NA	NA	NA	NA	NA	NA	NA	NA	NA	NA	NA	Ddah2	NA	NA	hsa_circ_0032222	chr14	65197755	65197887	+	132	132	NM_015549	PLEKHG3
hsa_circ_0003258	0.00202388	3.32687	6.6773	7.08712	6.84659	P	P	P	4.96379	4.93352	5.47444	P	P	P	hsa_circ_0003258	circRNA	ACACACACTGCACACACAAAAGACATGCCATTTACATGCGAAACCTGTGGAAAATCATTC	NA	NA	NA	NA	NA	NA	NA	NA	NA	NA	NA	---	NA	NA	hsa_circ_0003258	chr17	47388673	47389404	-	731	261	NM_001145365	ZNF652
hsa_circ_0056881	6.597e-05	3.32684	10.2035	10.0428	10.0529	P	P	P	8.45451	8.41061	8.22738	P	P	P	hsa_circ_0056881	circRNA	AGATAAAAAAACACCGTGGAAGGTTCTTCTGGGACTGCTGGGTGCTGCTGCGCTTGTCAC	NA	NA	NA	NA	NA	NA	NA	NA	NA	NA	NA	---	NA	NA	hsa_circ_0056881	chr2	162877090	162929996	-	52906	1170	NM_001935	DPP4
hsa_circ_0023368	0.000594894	3.32611	7.91536	7.7822	7.96599	P	P	P	6.19354	6.30037	5.95269	P	P	P	hsa_circ_0023368	circRNA	TTATCTTTACACGCTGCAGGCCATCTACGTGATTGACTTCTTCTGGAACGAAACCTGGTA	NA	NA	NA	NA	NA	NA	NA	NA	NA	NA	NA	---	NA	NA	hsa_circ_0023368	chr11	71148857	71148989	-	132	132	NM_001360	DHCR7
hsa_circ_0056280	0.00402491	3.32027	5.30916	5.37198	5.21228	P	P	P	3.84835	3.42274	3.38568	P	P	P	hsa_circ_0056280	circRNA	CCACAAACAGCATTCCTCTGAATATTGATTTGCTGAATAGCCCAGACTTATTGGAAGCAA	NA	NA	NA	NA	NA	NA	NA	NA	NA	NA	NA	---	NA	NA	hsa_circ_0056280	chr2	120885263	120903865	+	18602	456	NM_020909	EPB41L5
hsa_circ_0077867	0.00117999	3.31365	5.71026	5.72233	5.41433	P	P	P	3.91183	3.94927	3.81799	P	P	P	hsa_circ_0077867	circRNA	TATGATAATCCCACTTATGAGGAAGGTTGAGCCAGTGATACAGAGAGGCCATGAGAGTCT	NA	NA	NA	NA	NA	NA	NA	NA	NA	NA	NA	---	NA	NA	hsa_circ_0077867	chr6	132649151	132649733	-	582	283	NM_015529	MOXD1
hsa_circ_0015077	0.0122255	3.31102	4.49404	5.3955	5.32287	P	P	P	3.69543	3.33639	3.09622	P	P	P	hsa_circ_0015077	circRNA	TCTCTGTACTATGTCGATTCGACAGAGAGACAAGAAGAGAAACTGAAGAATAACAACAGA	NA	NA	NA	NA	NA	NA	NA	NA	NA	NA	NA	RMDN1	NA	NA	hsa_circ_0015077	chr1	165712403	165723511	-	11108	260	NM_019026	TMCO1
hsa_circ_0042512	0.00349441	3.30955	6.70586	6.49025	6.60817	P	P	P	4.65414	4.75599	5.16929	P	P	P	hsa_circ_0042512	circRNA	AGTCAGCTGAGAGATCCTGTCGGCCTGCTGGGCTTTCGACCTGCAGGAGAGACCCAGCTT	NA	NA	NA	NA	NA	NA	NA	NA	NA	NA	NA	---	NA	NA	hsa_circ_0042512	chr17	25944320	25944454	+	134	134	NM_014238	KSR1
hsa_circ_0014111	0.000100054	3.30862	5.51337	5.671	5.45994	P	P	P	3.75689	3.82846	3.88581	P	P	P	hsa_circ_0014111	circRNA	AGACAATCAGGACATCCCAATACCCATGCTAAGTGAGCTGTGTGAGGCAATGAAGGCAAA	NA	NA	NA	NA	NA	NA	NA	NA	NA	NA	NA	Rrp7a	NA	NA	hsa_circ_0014111	chr1	151143395	151144016	-	621	252	NM_013353	TMOD4
hsa_circ_0023374	0.000835319	3.30788	7.55886	7.44052	7.47787	P	P	P	5.93602	5.70749	5.64176	P	P	P	hsa_circ_0023374	circRNA	CCAGAGACTGGGGTTGTGAACAAGTATCAGATCAATGGCCTGCAAGCCTGGCTCCTCACG	NA	NA	NA	NA	NA	NA	NA	NA	NA	NA	NA	---	NA	NA	hsa_circ_0023374	chr11	71152272	71152486	-	214	214	NM_001360	DHCR7
hsa_circ_0075800	0.0492478	3.30441	3.42442	3.12557	3.01654	P	P	P	1.02403	0.68966	2.23041	A	A	A	hsa_circ_0075800	circRNA	TCTTAACTGGAATTCTTGTCACATTAGCAGCTAGAGCGGGAGCTGTGATACACAAGTTGG	NA	NA	NA	NA	NA	NA	NA	NA	NA	NA	NA	---	NA	NA	hsa_circ_0075800	chr6	20113106	20124831	-	11725	495	NM_001080480	MBOAT1
hsa_circ_0046924	0.00295836	3.3037	5.50654	5.54913	5.41387	P	P	P	3.62863	3.62378	4.01271	P	P	P	hsa_circ_0046924	circRNA	TGGCATCAAGCCAAATGAAAATCAAACAAACATCCCCTTTAATGAGTTGAACAAGTCTCT	NA	NA	NA	NA	NA	NA	NA	NA	NA	NA	NA	COX14	NA	NA	hsa_circ_0046924	chr18	10748468	10762623	-	14155	1301	NM_022068	PIEZO2
hsa_circ_0069822	0.0111253	3.30341	5.31969	5.05423	5.16889	P	P	P	2.98284	3.78223	3.50771	P	P	P	hsa_circ_0069822	circRNA	GGGAGGAAAGCAACAGTTGGGCAAGAATATCAAGTTTGGGCAGCGGTCACCCAATGCCAT	NA	NA	NA	NA	NA	NA	NA	NA	NA	NA	NA	---	NA	NA	hsa_circ_0069822	chr4	57173700	57182855	+	9155	3067	NM_020722	KIAA1211
hsa_circ_0069317	0.0219943	3.30147	2.91405	3.57588	3.14269	P	P	P	1.57666	0.737395	1.97089	A	A	A	hsa_circ_0069317	circRNA	TATAATAAATAGGTGTTTGTTATTGTGTCGATTTGACGGGATCTGAACTATACACCCAGG	NA	NA	NA	NA	NA	NA	NA	NA	NA	NA	NA	---	NA	NA	hsa_circ_0069317	chr4	22388998	22404422	-	15424	2063	NM_145290	GPR125
hsa_circ_0038722	0.00197742	3.29901	5.73845	6.24348	6.24595	P	P	P	4.16481	4.54767	4.38068	P	P	P	hsa_circ_0038722	circRNA	TTTGGAGTGAAAACGACCCGGCAGATAGCCCACACGTGTATCCCTGAGAACAACGGAGGC	NA	NA	NA	NA	NA	NA	NA	NA	NA	NA	NA	---	NA	NA	hsa_circ_0038722	chr16	27356189	27357939	+	1750	304	NM_000418	IL4R
hsa_circ_0085659	0.000165743	3.29785	6.76987	6.76499	7.0203	P	P	P	5.14558	5.27957	4.96311	P	P	P	hsa_circ_0085659	circRNA	TGAGATAGACAGTCACGACTTTGTCCTCAGGAGGGAGTTCCTGCTACCCATCGTGGGAGG	NA	NA	NA	NA	NA	NA	NA	NA	NA	NA	NA	Os01g0924800	NA	NA	hsa_circ_0085659	chr8	134478136	134488317	-	10181	553	NM_173344	ST3GAL1
hsa_circ_0073444	0.0436724	3.29607	9.43769	10.6352	10.4195	P	P	P	8.55226	8.40798	8.61969	P	P	P	hsa_circ_0073444	circRNA	TGACCTGCTTAAAAAGGCCAAGTTGGAGTATTTTATGATTCAAGCCTTAAATCAGAAGAC	NA	NA	NA	NA	NA	NA	NA	NA	NA	NA	NA	IQGAP3	NA	NA	hsa_circ_0073444	chr5	95087942	95119667	+	31725	1053	NM_014899	RHOBTB3
hsa_circ_0085414	0.00487553	3.29587	6.12426	6.62071	6.77129	P	P	P	4.74809	4.99008	4.67312	P	P	P	hsa_circ_0085414	circRNA	AGGAATGCCCTTAAAGATTTAGAAAAAAGAAAGGATCCAAAGCCCAGAGTCAAAGTTGTG	NA	NA	NA	NA	NA	NA	NA	NA	NA	NA	NA	---	NA	NA	hsa_circ_0085414	chr8	121180399	121326266	+	145867	4202	NM_021110	COL14A1
hsa_circ_0029924	0.00172071	3.29185	4.29678	3.97852	4.02305	P	P	P	2.68783	2.19077	2.22931	P	A	A	hsa_circ_0029924	circRNA	TTTACCCTGGCGAGAGTGTTCACTGGAGAGAAGCTCTGAATATCTTGAAGCTGGTAGTTT	NA	NA	NA	NA	NA	NA	NA	NA	NA	NA	NA	---	NA	NA	hsa_circ_0029924	chr13	32821459	32839753	+	18294	1118	NM_023037	FRY
hsa_circ_0091322	0.000444715	3.28669	9.60583	9.21107	9.44634	P	P	P	7.56106	7.71426	7.85058	P	P	P	hsa_circ_0091322	circRNA	TGCTGTTCCGTGGGCATTCCTCCAAGTAGACCAACGCCTTCAGACATGGCCATTGTTATG	NA	NA	NA	NA	NA	NA	NA	NA	NA	NA	NA	---	NA	NA	hsa_circ_0091322	chrX	108917630	108921644	-	4014	347	NM_022977	ACSL4
hsa_circ_0063518	0.0266046	3.28625	10.9405	11.8247	11.8395	P	P	P	9.91575	9.75394	9.94781	P	P	P	hsa_circ_0063518	circRNA	TCACAAATAAAGTCGTGTGGCAGCTTCACTTTCCCCGTCACCTGCCTGGAACAGGGGTGC	NA	NA	NA	NA	NA	NA	NA	NA	NA	NA	NA	H2-M3	NA	NA	hsa_circ_0063518	chr22	41641614	41681969	-	40355	7677	NM_002883	RANGAP1
hsa_circ_0069448	0.000287156	3.28355	11.219	11.1067	11.1364	P	P	P	9.30523	9.54889	9.45427	P	P	P	hsa_circ_0069448	circRNA	ACTTCCAGACTCTCAGACTGTGTGGAAAGATTGGTGCTCTCCTCTGTCTCAGACTATTTT	NA	NA	NA	NA	NA	NA	NA	NA	NA	NA	NA	---	NA	NA	hsa_circ_0069448	chr4	39082722	39114852	+	32130	1335	NM_015990	KLHL5
hsa_circ_0055006	9.29676e-06	3.28328	7.47959	7.3488	7.37431	P	P	P	5.70862	5.72258	5.62763	P	P	P	hsa_circ_0055006	circRNA	AACCGAGCAGCACCCTTACCCTTCTGAAGAACAGAAAAAGCAGTTGGCACAAGACACGGG	NA	NA	NA	NA	NA	NA	NA	NA	NA	NA	NA	---	NA	NA	hsa_circ_0055006	chr2	66775074	66794643	+	19569	136	NM_002398	MEIS1
hsa_circ_0087328	0.000114576	3.27989	6.91236	6.64151	6.79046	P	P	P	5.18222	5.11229	4.90769	P	P	P	hsa_circ_0087328	circRNA	ATGCAGAGCACCACAGAGCAGCAGCAGTTGCAAGCTCAGCATCTTTCTCATGGCCACGGA	NA	NA	NA	NA	NA	NA	NA	NA	NA	NA	NA	Rev1	NA	NA	hsa_circ_0087328	chr9	84249011	84249216	-	205	205	NM_005077	TLE1
hsa_circ_0023370	1.6553e-05	3.27521	7.51951	7.35893	7.46782	P	P	P	5.82896	5.65441	5.72741	P	P	P	hsa_circ_0023370	circRNA	ACACGCTGCAGGGGTTGTGAACAAGTATCAGATCAATGGCCTGCAAGCCTGGCTCCTCAC	NA	NA	NA	NA	NA	NA	NA	NA	NA	NA	NA	---	NA	NA	hsa_circ_0023370	chr11	71148857	71152486	-	3629	551	NM_001360	DHCR7
hsa_circ_0072512	0.00128803	3.27251	10.9791	11.0249	10.9649	P	P	P	9.21057	9.18516	9.42987	P	P	P	hsa_circ_0072512	circRNA	TACAGAACTGTACAACTCGTGTGGAAGGACCATCTAAAGCACCAAGTTTCTGGTATAAAA	NA	NA	NA	NA	NA	NA	NA	NA	NA	NA	NA	---	NA	NA	hsa_circ_0072512	chr5	55253036	55253119	-	83	83	NM_002184	IL6ST
hsa_circ_0010909	0.0305563	3.27216	2.96893	3.6219	3.1226	P	P	P	1.82455	1.89165	0.645586	A	A	A	hsa_circ_0010909	circRNA	TCATCAAGGAAAAGTGGAAACCGAAAGACTTTCTGAGAAAACCTGATTGGCGCCCTCTTG	NA	NA	NA	NA	NA	NA	NA	NA	NA	NA	NA	---	NA	NA	hsa_circ_0010909	chr1	24766661	24771734	+	5073	301	NM_020448	NIPAL3
hsa_circ_0069358	0.000265607	3.26842	6.31984	6.06895	6.15587	P	P	P	4.32842	4.41831	4.66246	P	P	P	hsa_circ_0069358	circRNA	TTGACTACCACTTCCGGGAGGATTTCCATTATAATGACACAGCTGGGTACTTCATTATTG	NA	NA	NA	NA	NA	NA	NA	NA	NA	NA	NA	LRP6	NA	NA	hsa_circ_0069358	chr4	25749048	25823750	-	74702	3240	NM_015187	SEL1L3
hsa_circ_0081908	0.00430421	3.26733	11.9542	12.329	12.3548	P	P	P	10.5533	10.4622	10.5304	P	P	P	hsa_circ_0081908	circRNA	AGTATATACTGTGAAGCAAAGTGCAGAAGATGTTAAGAAGCCTGTGACTGTGACCCCAGG	NA	NA	NA	NA	NA	NA	NA	NA	NA	NA	NA	---	NA	NA	hsa_circ_0081908	chr7	107566627	107580803	-	14176	1673	NM_002291	LAMB1
hsa_circ_0091293	0.019623	3.26665	8.66016	9.62697	9.33703	P	P	P	7.71725	7.54754	7.37809	P	P	P	hsa_circ_0091293	circRNA	AGGAAACTAATAAAGTGTGTGTACCTGTGTGAAGTGACCTCCATTGCAGACAGGCTGAAT	NA	NA	NA	NA	NA	NA	NA	NA	NA	NA	NA	FAM46A	NA	NA	hsa_circ_0091293	chrX	106888406	106894256	+	5850	1421	NM_002764	PRPS1
hsa_circ_0025426	0.00011021	3.26632	5.00882	4.91131	4.81477	P	P	P	3.21781	3.32745	3.06078	P	P	P	hsa_circ_0025426	circRNA	AACATTCAACTCCCTACTTTGTCCATCAGGTCAATTACAAGGATCGTAGTCCCTGTTACG	NA	NA	NA	NA	NA	NA	NA	NA	NA	NA	NA	---	NA	NA	hsa_circ_0025426	chr12	9241795	9254270	-	12475	1504	NM_000014	A2M
hsa_circ_0006835	0.00430632	3.26387	4.68453	4.39946	4.02022	P	P	P	2.87607	2.62223	2.54042	P	P	P	hsa_circ_0006835	circRNA	AAGAAACAGATCAAAAGCGGTTTCCAACCTAGATGAGGAAAGCCGATGGACAGTCCACTA	NA	NA	NA	NA	NA	NA	NA	NA	NA	NA	NA	---	NA	NA	hsa_circ_0006835	chr6	138794442	138817508	-	23066	281	NM_020464	NHSL1
hsa_circ_0073393	0.00143595	3.26225	6.29744	6.0648	6.05339	P	P	P	4.15781	4.47457	4.63843	P	P	P	hsa_circ_0073393	circRNA	AAAGAGATATTTTCAGACCCAAAGTTTACGCCTATCAGACCTACACAGAAAATCGCATCT	NA	NA	NA	NA	NA	NA	NA	NA	NA	NA	NA	---	NA	NA	hsa_circ_0073393	chr5	94230353	94248681	-	18328	489	NM_024717	MCTP1
hsa_circ_0069725	0.000389332	3.26219	7.74211	7.88969	7.98616	P	P	P	6.22249	6.11731	6.16912	P	P	P	hsa_circ_0069725	circRNA	AAACTCGATGCTTGAACTGTGAAACTGGCACCAATGCCTCTGCTCTGGAAAAAGACATTG	NA	NA	NA	NA	NA	NA	NA	NA	NA	NA	NA	Tp53i11	NA	NA	hsa_circ_0069725	chr4	53492184	53497311	-	5127	525	NM_001134223	USP46
hsa_circ_0057933	0.000267772	3.26067	5.27019	5.0377	4.93293	P	P	P	3.23073	3.45263	3.45173	P	P	P	hsa_circ_0057933	circRNA	ACCTCATCTCAAAAGCACAGGTCGACCACATATAATCCAGAAAACCTTGGCAGGACAGTA	NA	NA	NA	NA	NA	NA	NA	NA	NA	NA	NA	---	NA	NA	hsa_circ_0057933	chr2	207412152	207424842	+	12690	449	NM_003812	ADAM23
hsa_circ_0085009	0.0105585	3.25857	3.79844	4.36488	4.76751	P	P	P	2.22085	2.89949	2.77155	A	P	P	hsa_circ_0085009	circRNA	ACTCCATTCAGGAATACATACGGCAACTGGAATCTCGACCCTTGAATGGAGTTACACGAA	NA	NA	NA	NA	NA	NA	NA	NA	NA	NA	NA	---	NA	NA	hsa_circ_0085009	chr8	98787808	98828408	+	40600	837	NM_018407	LAPTM4B
hsa_circ_0079535	0.000174009	3.25402	6.85098	6.79488	6.9846	P	P	P	5.01418	5.29849	5.20341	P	P	P	hsa_circ_0079535	circRNA	AACTGTCATCTGAAAAACAACGTCTATGTCAAATCGACAACCATGGGCGGGTGCTTCTAG	NA	NA	NA	NA	NA	NA	NA	NA	NA	NA	NA	---	NA	NA	hsa_circ_0079535	chr7	20370724	20421508	+	50784	1665	NM_002214	ITGB8
hsa_circ_0003388	0.0282941	3.25379	4.62453	4.69553	4.91268	P	P	P	3.1458	3.45338	2.32106	P	P	A	hsa_circ_0003388	circRNA	TCAGGGATGCAAAAGGAAATCTGATAAGAATACGGTTGGACAGAATGAACTGAAGATTAC	NA	NA	NA	NA	NA	NA	NA	NA	NA	NA	NA	---	NA	NA	hsa_circ_0003388	chr8	68044185	68049838	+	5653	278	NM_024790	CSPP1
hsa_circ_0069376	2.70628e-06	3.25305	7.43905	7.44331	7.37868	P	P	P	5.75273	5.74001	5.66216	P	P	P	hsa_circ_0069376	circRNA	TTTGGAACCTTCGGGCAAACAGGATTCCACAGTGTCCTCTGGAAAATGAGTGGCGGCGGC	NA	NA	NA	NA	NA	NA	NA	NA	NA	NA	NA	Lrrc16a	NA	NA	hsa_circ_0069376	chr4	25848915	25864610	-	15695	885	NM_015187	SEL1L3
hsa_circ_0077962	0.000195319	3.25084	6.14916	6.06106	6.26732	P	P	P	4.2868	4.50151	4.57862	P	P	P	hsa_circ_0077962	circRNA	TGAGACTAAGGACTATGATTCTATTGTGAAGCTGGTAGAGACTTTAGAAAAACTGCCAAC	NA	NA	NA	NA	NA	NA	NA	NA	NA	NA	NA	---	NA	NA	hsa_circ_0077962	chr6	136879937	137017195	-	137258	3089	NM_005923	MAP3K5
hsa_circ_0080999	0.0165032	3.24995	8.52999	9.21556	9.14381	P	P	P	7.30571	7.28635	7.28917	P	P	P	hsa_circ_0080999	circRNA	GCCTATGTGCCATTTGGAGCTGCTCAAGGATCTAAATTTACTTGATCGCTGTATAAAAGA	NA	NA	NA	NA	NA	NA	NA	NA	NA	NA	NA	---	NA	NA	hsa_circ_0080999	chr7	91746357	91747929	-	1572	265	NM_000786	CYP51A1
hsa_circ_0073805	4.22946e-05	3.24845	7.26542	7.06753	7.14083	P	P	P	5.51072	5.37898	5.48838	P	P	P	hsa_circ_0073805	circRNA	TGTGAAAGAGTTCAGCAGTGCAGTGTGAGATGCATGAATGGTGGGACCTGTGCAGATGAC	NA	NA	NA	NA	NA	NA	NA	NA	NA	NA	NA	---	NA	NA	hsa_circ_0073805	chr5	127854965	127863660	-	8695	192	NM_001999	FBN2
hsa_circ_0025416	0.00592236	3.24732	4.02618	3.33283	3.73276	P	P	P	2.45019	1.85114	1.65144	A	A	A	hsa_circ_0025416	circRNA	CTCCACCCAGAGTCAGATGTAATGGGAAGAGGCCATGCACGCCTGGTGCATGTTGAAGAG	NA	NA	NA	NA	NA	NA	NA	NA	NA	NA	NA	---	NA	NA	hsa_circ_0025416	chr12	9227155	9246175	-	19020	1631	NM_000014	A2M
hsa_circ_0077982	0.000740364	3.24508	6.05288	5.90144	6.03687	P	P	P	4.16892	4.22075	4.49044	P	P	P	hsa_circ_0077982	circRNA	GAGCTTCTTGGACTATGATTCTATTGTGAAGCTGGTAGAGACTTTAGAAAAACTGCCAAC	NA	NA	NA	NA	NA	NA	NA	NA	NA	NA	NA	---	NA	NA	hsa_circ_0077982	chr6	137015277	137017195	-	1918	278	NM_005923	MAP3K5
hsa_circ_0062731	0.0251202	3.24491	5.45476	5.35504	5.25798	P	P	P	3.24424	4.19771	3.33569	P	P	P	hsa_circ_0062731	circRNA	ACTGTCCCAGTTTGCTGGGATGGAGTCAGGCTATGCTTGCTTCTGTGGAAACAATCCTGA	NA	NA	NA	NA	NA	NA	NA	NA	NA	NA	NA	---	NA	NA	hsa_circ_0062731	chr22	29521250	29534770	+	13520	646	NM_001039570	KREMEN1
hsa_circ_0085021	4.50882e-05	3.24375	5.91255	5.83218	5.9829	P	P	P	4.17949	4.32637	4.12514	P	P	P	hsa_circ_0085021	circRNA	ACAAGGCTACATTCTCAACTCGGATCAGACGACTTGCAGAAAGAGTTCCTGTGAGAACAA	NA	NA	NA	NA	NA	NA	NA	NA	NA	NA	NA	---	NA	NA	hsa_circ_0085021	chr8	98943180	98954127	+	10947	693	NM_002380	MATN2
hsa_circ_0064689	0.0362334	3.23634	2.73856	4.01624	3.8133	P	P	P	2.17899	1.51162	2.00939	A	A	A	hsa_circ_0064689	circRNA	CAGTACTAGTAGTTTGCACAAAGATCAAACAAGATGTAATGTTTGGATCTTAGATGGAGA	NA	NA	NA	NA	NA	NA	NA	NA	NA	NA	NA	---	NA	NA	hsa_circ_0064689	chr3	32582528	32586598	-	4070	401	NM_016141	DYNC1LI1
hsa_circ_0069446	0.000421023	3.23589	9.60644	9.41991	9.46384	P	P	P	7.78579	7.78748	7.84041	P	P	P	hsa_circ_0069446	circRNA	TGGACCCAGGACTTCCAATAGTAGTCAGACATTATCATCCTGTCATACTATGGAGCCATG	NA	NA	NA	NA	NA	NA	NA	NA	NA	NA	NA	---	NA	NA	hsa_circ_0069446	chr4	39077584	39116950	+	39366	1690	NM_015990	KLHL5
hsa_circ_0025124	0.00704571	3.23502	6.90219	7.2204	7.08876	P	P	P	5.62166	5.50439	4.93165	P	P	P	hsa_circ_0025124	circRNA	ATAAAAAATTATGACAATGTCCTGGACTGGTGAGTCTATATTCTGATCGGAGCCGGCGCC	NA	NA	NA	NA	NA	NA	NA	NA	NA	NA	NA	---	NA	NA	hsa_circ_0025124	chr12	6341797	6347437	+	5640	955	NM_001769	CD9
hsa_circ_0025424	0.0158401	3.23414	4.82038	4.65114	4.35856	P	P	P	3.25773	2.28265	3.07347	P	A	P	hsa_circ_0025424	circRNA	TAGAGAAGGAAACAACATTCAACTCCCTACTTTGTCCATCAGGTCAGTGTGCAGCTGGAA	NA	NA	NA	NA	NA	NA	NA	NA	NA	NA	NA	---	NA	NA	hsa_circ_0025424	chr12	9241795	9243078	-	1283	301	NM_000014	A2M
hsa_circ_0079539	0.00971655	3.23376	5.7641	5.31001	5.22069	P	P	P	3.77459	3.76395	3.73706	P	P	P	hsa_circ_0079539	circRNA	CAAACTTCAGAAGACAATAGATGTGCATCTTCAAATGCAGCATCCTGTGCCAGGTGCCTT	NA	NA	NA	NA	NA	NA	NA	NA	NA	NA	NA	---	NA	NA	hsa_circ_0079539	chr7	20403259	20445794	+	42535	1896	NM_002214	ITGB8
hsa_circ_0077741	5.83185e-05	3.23227	8.66549	8.7446	8.65675	P	P	P	6.97694	7.00666	7.00703	P	P	P	hsa_circ_0077741	circRNA	TTTTAATGTGATGATGAAACATGCTTGGAATAATTATAAAGGTTATGCCTGGGGATTAAA	NA	NA	NA	NA	NA	NA	NA	NA	NA	NA	NA	---	NA	NA	hsa_circ_0077741	chr6	119623152	119628157	-	5005	213	NM_005907	MAN1A1
hsa_circ_0027778	0.00969066	3.22967	4.8174	5.61341	5.58678	P	P	P	3.89913	3.90702	3.14542	P	P	P	hsa_circ_0027778	circRNA	CTCTTAAAACACTGGCCCTGAGCATTAACAAAGCGTAGAAGGTTTTCCTCCAAACCAGTT	NA	NA	NA	NA	NA	NA	NA	NA	NA	NA	NA	Tox	NA	NA	hsa_circ_0027778	chr12	95910887	95918564	-	7677	1557	NM_032147	USP44
hsa_circ_0079832	0.0441098	3.22851	4.05467	5.22168	5.01061	P	P	P	3.0823	3.24323	3.12949	P	P	P	hsa_circ_0079832	circRNA	AGCTAAACAACAGACACATGTAAGGTTATTCAAGGATGTTTTTGGTTATTTGGAACTGTC	NA	NA	NA	NA	NA	NA	NA	NA	NA	NA	NA	---	NA	NA	hsa_circ_0079832	chr7	34985278	34994390	-	9112	305	NM_015283	DPY19L1
hsa_circ_0032957	0.0364242	3.22681	6.95381	8.00511	8.17193	P	P	P	6.38915	6.04681	5.84513	P	P	P	hsa_circ_0032957	circRNA	ACCAGCTCAGCAAGAAGGGAAGAGCATGGAGGAAATCAAGAAGGTGCTGCTGCTGGTGCT	NA	NA	NA	NA	NA	NA	NA	NA	NA	NA	NA	---	NA	NA	hsa_circ_0032957	chr14	91787463	91810001	-	22538	1187	NM_001080414	CCDC88C
hsa_circ_0050104	0.0177838	3.22668	11.756	12.4972	12.4751	P	P	P	10.6375	10.6403	10.4909	P	P	P	hsa_circ_0050104	circRNA	AACTCTGGTGATAAAAATAAAGCTGTCTGAACTGTTAGTCCCAGCTCAGAGCCGCAACCT	NA	NA	NA	NA	NA	NA	NA	NA	NA	NA	NA	---	NA	NA	hsa_circ_0050104	chr19	18496967	18499986	+	3019	1200	NM_004864	GDF15
hsa_circ_0006173	0.00690381	3.22591	3.48801	2.83236	2.83186	P	P	P	1.3281	1.79073	0.942963	A	A	A	hsa_circ_0006173	circRNA	ACGGAGGAGCTTTCCCCAGCACCTGGGCCAGGAAACTCCTGGATCGAGGCTGGCATCTTT	NA	NA	NA	NA	NA	NA	NA	NA	NA	NA	NA	Abl1	NA	NA	hsa_circ_0006173	chr16	792249	792543	+	294	294	---	---
hsa_circ_0047668	0.00158505	3.2251	5.57374	5.28377	5.38869	P	P	P	3.89006	3.42531	3.83473	P	P	P	hsa_circ_0047668	circRNA	CGAATCACAGATGAGCGGTATCTTTGAAAACTGGCTGCACAAACTCGTGTCAGCCCTGCA	NA	NA	NA	NA	NA	NA	NA	NA	NA	NA	NA	---	NA	NA	hsa_circ_0047668	chr18	47093811	47095918	+	2107	292	NM_006033	LIPG
hsa_circ_0072452	0.000830466	3.22401	6.19305	5.83754	6.01007	P	P	P	4.32905	4.24511	4.41673	P	P	P	hsa_circ_0072452	circRNA	CAGCTGCTCACCATTGTATATAACATCACACTTGATGCAGATGGATTTTCATCCAGAGTA	NA	NA	NA	NA	NA	NA	NA	NA	NA	NA	NA	---	NA	NA	hsa_circ_0072452	chr5	52365938	52368525	+	2587	346	NM_002203	ITGA2
hsa_circ_0037096	0.0102632	3.22392	5.33634	5.28056	5.35715	P	P	P	3.25782	3.85946	3.72487	P	P	P	hsa_circ_0037096	circRNA	AAATCCAAGATCTGCCATCCCAGGTCCGCAACCCGGAGAAGCAAGGAGCATCCCCTTAGT	NA	NA	NA	NA	NA	NA	NA	NA	NA	NA	NA	Ccdc93	NA	NA	hsa_circ_0037096	chr15	101906400	101910728	-	4328	326	NM_002570	PCSK6
hsa_circ_0056652	0.0102146	3.22266	4.37002	5.09547	4.41418	P	P	P	2.88109	3.16996	2.86274	P	P	P	hsa_circ_0056652	circRNA	TTCCCAAAATACAGGATCTGCCTCCAGGCAGTTCTTTGAATTTCTCACCCTAAGATCTGG	NA	NA	NA	NA	NA	NA	NA	NA	NA	NA	NA	---	NA	NA	hsa_circ_0056652	chr2	143635194	143643105	+	7911	385	NM_001199241	KYNU
hsa_circ_0071287	0.00861594	3.22188	4.19028	5.06159	4.85072	P	P	P	3.18711	2.6439	3.26742	P	P	P	hsa_circ_0071287	circRNA	GATTATTATTACAGATTTCCATAATCATTCTGTCAAGCAGCGTGCAGGGTCAAAGACAGC	NA	NA	NA	NA	NA	NA	NA	NA	NA	NA	NA	Sim1	NA	NA	hsa_circ_0071287	chr4	154191489	154245300	+	53811	1989	NM_001130067	TRIM2
hsa_circ_0063507	0.0262147	3.22087	10.7256	11.4778	11.5891	P	P	P	9.62858	9.63347	9.61093	P	P	P	hsa_circ_0063507	circRNA	TCACAAATAAAGTCGTGTGGCAGCTTCAGCCCAACAGCGCCCTGGAATCCTGCTCCTTCG	NA	NA	NA	NA	NA	NA	NA	NA	NA	NA	NA	H2afz	NA	NA	hsa_circ_0063507	chr22	41641614	41642676	-	1062	1062	NM_002883	RANGAP1
hsa_circ_0057932	0.0161362	3.21813	5.15167	5.2434	5.17251	P	P	P	3.01434	3.74104	3.65223	P	P	P	hsa_circ_0057932	circRNA	TATATGATAGAGCCACTAGAGCTGGTTCATGATGAGGGTGGAGAGCACTGTTACTACCAT	NA	NA	NA	NA	NA	NA	NA	NA	NA	NA	NA	---	NA	NA	hsa_circ_0057932	chr2	207406775	207408040	+	1265	147	NM_003812	ADAM23
hsa_circ_0025973	0.000199516	3.21749	8.6671	8.35488	8.54832	P	P	P	6.75278	6.79431	6.97285	P	P	P	hsa_circ_0025973	circRNA	AAGTATTTAAACAACGTGCAGTCCGACCTCCTTCACAAATATCAGAGTAAAGATGACATT	NA	NA	NA	NA	NA	NA	NA	NA	NA	NA	NA	MIR518D	NA	NA	hsa_circ_0025973	chr12	46576840	46592526	-	15686	6373	NM_030674	SLC38A1
hsa_circ_0081876	1.1455e-05	3.21501	8.51555	8.61556	8.46126	P	P	P	6.91804	6.76894	6.85132	P	P	P	hsa_circ_0081876	circRNA	GAAGTGTTAAGTTTTGGAGATTTTAGGTAAGAAGTTTCCTGTTACTGAGAACTCAAAGGG	NA	NA	NA	NA	NA	NA	NA	NA	NA	NA	NA	---	NA	NA	hsa_circ_0081876	chr7	105888731	105902153	-	13422	3304	NM_005746	NAMPT
hsa_circ_0080944	2.0691e-06	3.21199	6.84748	6.81902	6.89875	P	P	P	5.13947	5.14653	5.22827	P	P	P	hsa_circ_0080944	circRNA	CACTAAGCAGAAAGAATGTGCTAATTTCATCAAGGTACTTAAGGCATATAATCAGACTCA	NA	NA	NA	NA	NA	NA	NA	NA	NA	NA	NA	LRRC27	NA	NA	hsa_circ_0080944	chr7	83614751	83739905	-	125154	1161	NM_006080	SEMA3A
hsa_circ_0079041	0.000444005	3.20853	7.99096	7.92987	7.69734	P	P	P	6.21535	6.26438	6.10442	P	P	P	hsa_circ_0079041	circRNA	ATTGTGGTCCAGGGAGAGCCTGGGGACGACTTTTACATCATCACGGAGGAAGGAAGCAGC	NA	NA	NA	NA	NA	NA	NA	NA	NA	NA	NA	Ergic3	NA	NA	hsa_circ_0079041	chr7	618892	751164	-	132272	913	NM_001164761	PRKAR1B
hsa_circ_0016204	0.0107889	3.20243	4.12237	3.92288	4.29332	P	P	P	2.36138	2.84778	1.98541	A	P	A	hsa_circ_0016204	circRNA	CACTCTGACCAACAGAGTTGTCCACCGAGATCTCAAGCTGGAGAACATCCTCTTGGATGC	NA	NA	NA	NA	NA	NA	NA	NA	NA	NA	NA	arfgap2	NA	NA	hsa_circ_0016204	chr1	205276653	205277358	-	705	705	NM_030952	NUAK2
hsa_circ_0012531	0.0382239	3.19877	3.4862	4.69161	4.62772	P	P	P	3.0138	2.47314	2.50611	P	A	P	hsa_circ_0012531	circRNA	CCCAACAAACCTTTCTATACTCAAGATGAATCATCCAGATCTTCTGATAAAAGTACTTGG	NA	NA	NA	NA	NA	NA	NA	NA	NA	NA	NA	zn271	NA	NA	hsa_circ_0012531	chr1	52891020	52959334	-	68314	3604	NM_001009881	ZCCHC11
hsa_circ_0082465	0.0466539	3.19686	9.83403	10.9162	10.8992	P	P	P	8.94091	8.9753	8.94426	P	P	P	hsa_circ_0082465	circRNA	TCTCTTTGCCTCAAATAAAAAGTGCTTTTGTGAGGCCATGGAAGAGCTGGTGGATGAAGG	NA	NA	NA	NA	NA	NA	NA	NA	NA	NA	NA	---	NA	NA	hsa_circ_0082465	chr7	134127106	134133871	-	6765	895	NM_001628	AKR1B1
hsa_circ_0022397	3.16815e-05	3.19662	7.8641	7.68698	7.77431	P	P	P	6.20533	6.08528	6.0034	P	P	P	hsa_circ_0022397	circRNA	TAAAATAAGGAATTTTATTCTCGTCCCTGAAGAAGTCTGGGAAGCTGTGGCTGGACGCCT	NA	NA	NA	NA	NA	NA	NA	NA	NA	NA	NA	---	NA	NA	hsa_circ_0022397	chr11	61633109	61634825	+	1716	1716	NM_004265	FADS2
hsa_circ_0078886	4.07998e-05	3.19468	7.18452	7.0233	7.07506	P	P	P	5.35298	5.36108	5.53879	P	P	P	hsa_circ_0078886	circRNA	TTCTGTCAGGGCCAACACAGCCTCCTGAATGATGCCAGCCCAGTATGCTCTAACCTCCAG	NA	NA	NA	NA	NA	NA	NA	NA	NA	NA	NA	ADRBK2	NA	NA	hsa_circ_0078886	chr6_dbb_hap3	3335760	3345178	-	9418	9418	---	---
hsa_circ_0016773	0.0023045	3.19451	4.8631	4.98358	4.9458	P	P	P	3.02337	3.33078	3.38817	P	P	P	hsa_circ_0016773	circRNA	AAAGTCACAGAGCCCAAGGTGGTGTTTGCCAAGGAGCAGCCAGTGCACAGGGAGGTGCAG	NA	NA	NA	NA	NA	NA	NA	NA	NA	NA	NA	ATP6V1H	NA	NA	hsa_circ_0016773	chr1	228444351	228497260	+	52909	8703	NM_001098623	OBSCN
hsa_circ_0007847	9.85182e-07	3.19252	6.138	6.22068	6.17215	P	P	P	4.46199	4.50073	4.54405	P	P	P	hsa_circ_0007847	circRNA	ATTATGGGAGTGACAAACAAGAAACCCACACAGGCGTCCATCACAAAGGTCAAACAGTTT	NA	NA	NA	NA	NA	NA	NA	NA	NA	NA	NA	Pdcd4	NA	NA	hsa_circ_0007847	chr14	25325141	25326363	-	1222	297	NM_014178	STXBP6
hsa_circ_0051124	0.000113044	3.19087	8.01002	7.91564	8.07254	P	P	P	6.43201	6.34663	6.19182	P	P	P	hsa_circ_0051124	circRNA	GCAGGACTCAGACGTGGACGAATGTCAGCTCTTCCGAGACCAGGTGTGCAAGAGTGGCGT	NA	NA	NA	NA	NA	NA	NA	NA	NA	NA	NA	---	NA	NA	hsa_circ_0051124	chr19	41129508	41131914	+	2406	429	NM_001042544	LTBP4
hsa_circ_0069174	0.000984634	3.18997	6.24334	5.99426	5.95109	P	P	P	4.41849	4.32465	4.4399	P	P	P	hsa_circ_0069174	circRNA	ATTCATTCAGGTGGCATCCCGTTCATCTTGACTGGTGAGTTCTTCCAGCAATCTCAGCGG	NA	NA	NA	NA	NA	NA	NA	NA	NA	NA	NA	Mir377	NA	NA	hsa_circ_0069174	chr4	9836504	9836632	-	128	128	NM_001001290	SLC2A9
hsa_circ_0073795	0.00191069	3.18959	7.6271	7.11575	7.3856	P	P	P	5.55647	5.75625	5.82724	P	P	P	hsa_circ_0073795	circRNA	TGTATGTTTGGACAGCCTGAAGGGGACCTGTTGGCTCAACATCCAGGACAGCCGCTGTGA	NA	NA	NA	NA	NA	NA	NA	NA	NA	NA	NA	---	NA	NA	hsa_circ_0073795	chr5	127685038	127686697	-	1659	315	NM_001999	FBN2
hsa_circ_0030960	0.00488982	3.18874	3.27231	2.68726	2.84783	P	P	P	1.35115	1.57972	0.821577	A	A	A	hsa_circ_0030960	circRNA	TCAGTGAGAAAAAACAAAAATTAACAGCGGTTATGAAGACTGGCTTCGACATAAAGCAGA	NA	NA	NA	NA	NA	NA	NA	NA	NA	NA	NA	---	NA	NA	hsa_circ_0030960	chr13	113464932	113515112	+	50180	2906	NM_015205	ATP11A
hsa_circ_0072454	0.000303309	3.18529	6.6915	6.4905	6.34423	P	P	P	4.9458	4.69827	4.87787	P	P	P	hsa_circ_0072454	circRNA	AACAGACAAGTGAAAGCCAAGAAGAAAACAAGGCTGATAATTTGGTCAACCTCAAAATTC	NA	NA	NA	NA	NA	NA	NA	NA	NA	NA	NA	---	NA	NA	hsa_circ_0072454	chr5	52371050	52376451	+	5401	298	NM_002203	ITGA2
hsa_circ_0046335	0.0248584	3.18296	7.85142	8.69563	8.73118	P	P	P	6.73347	6.7401	6.94277	P	P	P	hsa_circ_0046335	circRNA	TAAACCGCATGTGATCTCCAGCGTGACCTTCCCCTCAGGGGATATCCAGGAGCAGCTCAT	NA	NA	NA	NA	NA	NA	NA	NA	NA	NA	NA	---	NA	NA	hsa_circ_0046335	chr17	80036213	80050688	-	14475	7563	NM_004104	FASN
hsa_circ_0087330	0.00626624	3.18268	4.12825	4.28074	4.06395	P	P	P	2.74931	2.52785	2.12622	P	P	A	hsa_circ_0087330	circRNA	CTACCAGGTCTACCTCCTACATATTATGAAATGTCATATGGATTAAACATTGAAATGCAC	NA	NA	NA	NA	NA	NA	NA	NA	NA	NA	NA	Rev1	NA	NA	hsa_circ_0087330	chr9	84267098	84300635	-	33537	213	NM_005077	TLE1
hsa_circ_0081392	0.0260165	3.18207	10.6619	11.4283	11.503	P	P	P	9.56027	9.55803	9.6046	P	P	P	hsa_circ_0081392	circRNA	CTCCTTTTGCTAATAAAAGTGTTTGTAGATTGTCGCGTTACATAGCCATGTGCCGCGAGA	NA	NA	NA	NA	NA	NA	NA	NA	NA	NA	NA	---	NA	NA	hsa_circ_0081392	chr7	99690403	99691964	-	1561	632	NM_182776	MCM7
hsa_circ_0044246	0.00108657	3.18105	3.7688	3.98278	3.52218	P	P	P	2.14727	2.20665	1.9339	A	A	A	hsa_circ_0044246	circRNA	TTACTTATAGAAGTTACGGAAGAGTCAAGGCTGGGACCTCATGGCATCATTTTCCATGGA	NA	NA	NA	NA	NA	NA	NA	NA	NA	NA	NA	akt3a	NA	NA	hsa_circ_0044246	chr17	45600322	45663764	+	63442	9324	NM_006310	NPEPPS
hsa_circ_0077965	3.502e-05	3.17914	8.38379	8.28046	8.45438	P	P	P	6.67587	6.61688	6.81779	P	P	P	hsa_circ_0077965	circRNA	GGTCACTGAATGTACAGCTTGGAAGGATGAAAATAGAAACCAATAGTATGACTATGAATA	NA	NA	NA	NA	NA	NA	NA	NA	NA	NA	NA	---	NA	NA	hsa_circ_0077965	chr6	136888768	136944119	-	55351	1745	NM_005923	MAP3K5
hsa_circ_0073201	0.0203723	3.17912	4.11004	3.83511	3.67691	P	P	P	1.61944	2.71369	2.10818	A	P	A	hsa_circ_0073201	circRNA	GAAAAGAAAAGCTGAGAAACATGCTGGAGTTTCCTGCGTTACAGCCTCAGTGGATGACAT	NA	NA	NA	NA	NA	NA	NA	NA	NA	NA	NA	---	NA	NA	hsa_circ_0073201	chr5	80659606	80681645	-	22039	233	NM_130767	ACOT12
hsa_circ_0032435	0.0253685	3.17551	3.84306	4.5322	4.98714	P	P	P	3.14093	2.66526	2.72881	P	P	P	hsa_circ_0032435	circRNA	GCTGTCAATACTCACTGCTTAAGATTCGATTGAATAGACTATTGACCATTGATACAGATT	NA	NA	NA	NA	NA	NA	NA	NA	NA	NA	NA	Ccdc148	NA	NA	hsa_circ_0032435	chr14	71479716	71485879	+	6163	357	NM_014982	PCNX
hsa_circ_0073803	0.000353417	3.17393	7.07614	6.93307	6.73121	P	P	P	5.25102	5.3677	5.13409	P	P	P	hsa_circ_0073803	circRNA	CGATGCATCGTTCAGCAGTGCAGTGTGAGATGCATGAATGGTGGGACCTGTGCAGATGAC	NA	NA	NA	NA	NA	NA	NA	NA	NA	NA	NA	---	NA	NA	hsa_circ_0073803	chr5	127744366	127863660	-	119294	642	NM_001999	FBN2
hsa_circ_0027326	0.0407417	3.1719	4.06929	4.11061	4.06723	P	P	P	1.67848	2.35285	2.94755	A	A	P	hsa_circ_0027326	circRNA	TGCTCACTGCGTGCAGGGCGCCGCGCACTTCGGGCCGGTGTGGCTAGCCAGCTTTGGGAC	NA	NA	NA	NA	NA	NA	NA	NA	NA	NA	NA	---	NA	NA	hsa_circ_0027326	chr12	58159789	58159980	-	191	191	NM_000785	CYP27B1
hsa_circ_0073801	2.69904e-05	3.16928	7.5655	7.48826	7.40472	P	P	P	5.71165	5.88986	5.86267	P	P	P	hsa_circ_0073801	circRNA	GTGTGTGTTGATGTTGATGAATGCCAGACCCCAGGAATCTGCATGAATGGGCACTGCATC	NA	NA	NA	NA	NA	NA	NA	NA	NA	NA	NA	---	NA	NA	hsa_circ_0073801	chr5	127710320	127710443	-	123	123	NM_001999	FBN2
hsa_circ_0031407	0.00161471	3.16634	6.58096	6.31993	6.29227	P	P	P	4.7627	4.96476	4.44909	P	P	P	hsa_circ_0031407	circRNA	TGCGCACAAGTGACAAACAAGAAACCCACACAGGCGTCCATCACAAAGGTCAAACAGTTT	NA	NA	NA	NA	NA	NA	NA	NA	NA	NA	NA	Pdcd4	NA	NA	hsa_circ_0031407	chr14	25288242	25326363	-	38121	455	NM_014178	STXBP6
hsa_circ_0056747	0.0488523	3.16093	4.94108	6.21942	5.96398	P	P	P	4.32748	4.10119	3.98184	P	P	P	hsa_circ_0056747	circRNA	ACTTTTGCAGAAGATGAGGAGTTACAAATAAGCAAGAAGAGTGCACCACAACATCAACAG	NA	NA	NA	NA	NA	NA	NA	NA	NA	NA	NA	Fam196a	NA	NA	hsa_circ_0056747	chr2	153526744	153533293	-	6549	974	NM_017892	PRPF40A
hsa_circ_0028207	0.0177493	3.15986	3.35526	4.40443	4.10418	P	P	P	2.85657	2.14373	1.89582	P	A	A	hsa_circ_0028207	circRNA	TTAAAACTTTTCTTGCATTCAATATTTCTTCAGATGATTCTGAATCACACATGAGTGAAG	NA	NA	NA	NA	NA	NA	NA	NA	NA	NA	NA	---	NA	NA	hsa_circ_0028207	chr12	110927823	110928192	+	369	369	NM_013300	C12orf24
hsa_circ_0022388	0.00159091	3.15906	10.3849	10.0658	10.294	P	P	P	8.64421	8.59709	8.54156	P	P	P	hsa_circ_0022388	circRNA	CAGTAGCCAGGGTGCCTCTGCCAACTGGTGGAATCATCGCCACTTCCAGCACCACGCCAA	NA	NA	NA	NA	NA	NA	NA	NA	NA	NA	NA	---	NA	NA	hsa_circ_0022388	chr11	61615630	61630850	+	15220	459	NM_004265	FADS2
hsa_circ_0017764	0.0252074	3.15883	7.20928	8.31812	8.1774	P	P	P	6.57314	6.39089	5.9164	P	P	P	hsa_circ_0017764	circRNA	TTTCGTAAAATAAAAGCACAGAACAGAAACTTGGGAATCAGTGAAACGTACAACCAGGAA	NA	NA	NA	NA	NA	NA	NA	NA	NA	NA	NA	Arhgap26	NA	NA	hsa_circ_0017764	chr10	12209572	12221131	-	11559	657	NM_014142	NUDT5
hsa_circ_0087317	0.000542229	3.15728	5.93406	5.73319	6.03503	P	P	P	4.14276	4.47342	4.09621	P	P	P	hsa_circ_0087317	circRNA	CACTAGTGAGTGCATACTCCTTCCACGTTACTGCAGACGGTCAGATGCAGCCTGTCCCTT	NA	NA	NA	NA	NA	NA	NA	NA	NA	NA	NA	Rere	NA	NA	hsa_circ_0087317	chr9	84205719	84208189	-	2470	498	NM_005077	TLE1
hsa_circ_0046915	0.00449596	3.15535	7.16881	7.10714	6.7184	P	P	P	5.38568	5.27272	5.39923	P	P	P	hsa_circ_0046915	circRNA	ACCATAAAGAAACTTAAGGAACAAATGGCACCTGGTGATTGACCGCCTCACTGTGCTCTT	NA	NA	NA	NA	NA	NA	NA	NA	NA	NA	NA	CORO7	NA	NA	hsa_circ_0046915	chr18	10697745	10770306	-	72561	3778	NM_022068	PIEZO2
hsa_circ_0059389	0.0181329	3.15167	9.40277	9.203	8.56816	P	P	P	7.56887	7.35534	7.39729	P	P	P	hsa_circ_0059389	circRNA	AAAGTGAGAGCACGACATCATAAAATAAATCCATCAGAATGACACCTTCTCAGGTTGCCT	NA	NA	NA	NA	NA	NA	NA	NA	NA	NA	NA	---	NA	NA	hsa_circ_0059389	chr20	5556461	5585086	-	28625	896	NM_019593	GPCPD1
hsa_circ_0084804	0.00761072	3.15104	5.29323	5.01564	5.01071	P	P	P	3.75002	3.50851	3.01903	P	P	P	hsa_circ_0084804	circRNA	GATGAACGTGGCCAAGAAAGAAGAGAGAACTCTCACCACAACATTTCAAAGGGAATACAT	NA	NA	NA	NA	NA	NA	NA	NA	NA	NA	NA	Btbd2	NA	NA	hsa_circ_0084804	chr8	81903713	81942324	-	38611	351	NM_018440	PAG1
hsa_circ_0062059	0.0265541	3.15079	4.42716	5.46354	5.56551	P	P	P	3.72432	3.01676	3.86318	P	P	P	hsa_circ_0062059	circRNA	ATAAACAGACATTGATTCCCTTATCAGAAGGCACATTGAGGATAAGTCCACCGTGTTTGG	NA	NA	NA	NA	NA	NA	NA	NA	NA	NA	NA	---	NA	NA	hsa_circ_0062059	chr21	47609037	47641889	-	32852	3751	NM_001145437	LSS
hsa_circ_0070794	0.000352326	3.1505	7.33575	7.39536	7.16944	P	P	P	5.63169	5.47236	5.81832	P	P	P	hsa_circ_0070794	circRNA	GAGAGAAAAGAACTCAACATAGAACCCACTAAGTGAACATCCACTTGCCCAGCTTTACTG	NA	NA	NA	NA	NA	NA	NA	NA	NA	NA	NA	Cd82	NA	NA	hsa_circ_0070794	chr4	120423735	120432289	-	8554	406	NM_001083	PDE5A
hsa_circ_0072516	0.000391088	3.14744	10.5622	10.763	10.8743	P	P	P	8.8922	9.06133	9.27493	P	P	P	hsa_circ_0072516	circRNA	GAATCTACAGTGAAACCCAATGGAAAAAGCATGACATTTAGAAGTAGAAGACTTAGCTTC	NA	NA	NA	NA	NA	NA	NA	NA	NA	NA	NA	---	NA	NA	hsa_circ_0072516	chr5	55272042	55278639	-	6597	167	NM_002184	IL6ST
hsa_circ_0001589	0.0010972	3.1461	6.41384	6.56738	6.50868	P	P	P	4.80765	4.67536	5.02812	P	P	P	hsa_circ_0001589	circRNA	CGAAGAAAAACATCAAAAAGACTCCTAAGAAGGTAAAGAAGCCAGCAACCGCTGCTGGGA	NA	NA	NA	NA	NA	NA	NA	NA	NA	NA	NA	---	NA	NA	hsa_circ_0001589	chr6	26234499	26234709	-	210	210	NM_005320	HIST1H1D
hsa_circ_0016776	0.00952332	3.14367	4.83715	4.55462	4.8417	P	P	P	3.51716	2.7871	2.87539	P	P	P	hsa_circ_0016776	circRNA	AAAGTCACAGAGCCCAAGGTGGTGTTTGCCAAGGAGCAGCCAGCACACAGGGAGGTGCAG	NA	NA	NA	NA	NA	NA	NA	NA	NA	NA	NA	ATP8A1	NA	NA	hsa_circ_0016776	chr1	228456230	228497260	+	41030	8151	NM_001098623	OBSCN
hsa_circ_0077835	0.00828952	3.13872	6.57661	6.91366	7.17188	P	P	P	5.28128	5.17831	5.30974	P	P	P	hsa_circ_0077835	circRNA	CAGGAGATGGAGATATTGATCATGACCAGACTGTAAAAGGTGGAATTTCTGAAACAAGAA	NA	NA	NA	NA	NA	NA	NA	NA	NA	NA	NA	---	NA	NA	hsa_circ_0077835	chr6	131184777	131184858	-	81	81	NM_001431	EPB41L2
hsa_circ_0069443	7.59354e-05	3.13658	9.31614	9.072	9.24017	P	P	P	7.61256	7.43271	7.63763	P	P	P	hsa_circ_0069443	circRNA	GCACCACAGTACTTCCAATAGTAGTCAGACATTATCATCCTGTCATACTATGGAGCCATG	NA	NA	NA	NA	NA	NA	NA	NA	NA	NA	NA	---	NA	NA	hsa_circ_0069443	chr4	39077584	39088347	+	10763	730	NM_015990	KLHL5
hsa_circ_0070725	0.000376354	3.13462	7.88773	8.17681	8.19425	P	P	P	6.30081	6.35708	6.65104	P	P	P	hsa_circ_0070725	circRNA	CCACCTTGTAGTTTTCCTGTCAGACTGATGGATGGAGAAAATAAGAAAGAAGGACGAGTG	NA	NA	NA	NA	NA	NA	NA	NA	NA	NA	NA	Fbn1	NA	NA	hsa_circ_0070725	chr4	119201192	119229732	-	28540	3037	NM_003619	PRSS12
hsa_circ_0040887	0.0356535	3.13425	5.45126	6.66249	6.50345	P	P	P	4.80756	4.81004	4.26079	P	P	P	hsa_circ_0040887	circRNA	AACTCTAATAAAGTCATGCTTACAGCCACTAGCGTTTTGAGGAGTGCAATGTTGGCCAGA	NA	NA	NA	NA	NA	NA	NA	NA	NA	NA	NA	---	NA	NA	hsa_circ_0040887	chr16	88872131	88875666	+	3535	1935	NM_030928	CDT1
hsa_circ_0036029	0.0479189	3.13225	2.53813	3.55313	3.94505	P	P	P	1.96572	1.40867	1.98481	A	A	A	hsa_circ_0036029	circRNA	CCAGCACCTGAAGAATTGATGATGAAGATGAAGATGGTGATCGAATTACAGTGAGAAGTG	NA	NA	NA	NA	NA	NA	NA	NA	NA	NA	NA	---	NA	NA	hsa_circ_0036029	chr15	67855620	68065090	+	209470	1058	NM_145160	MAP2K5
hsa_circ_0053890	0.00524126	3.12977	6.93006	6.89773	6.82591	P	P	P	5.50005	5.13464	5.04103	P	P	P	hsa_circ_0053890	circRNA	AACTGCATAGAGTGACTCCTCTTTCTTCCCAGAGTGTGGTGATTCACCATGGCCAGACCC	NA	NA	NA	NA	NA	NA	NA	NA	NA	NA	NA	---	NA	NA	hsa_circ_0053890	chr2	33335648	33500157	+	164509	2006	NM_206943	LTBP1
hsa_circ_0025420	0.00105347	3.12939	4.48769	4.3129	4.41133	P	P	P	2.67707	2.96349	2.61452	A	P	P	hsa_circ_0025420	circRNA	GTGAAGAAAGGTCCCAAAGTCTTCATCCAATGAGGAGGTAATGTTCCTCACTGTCCAAGT	NA	NA	NA	NA	NA	NA	NA	NA	NA	NA	NA	---	NA	NA	hsa_circ_0025420	chr12	9229351	9265132	-	35781	3262	NM_000014	A2M
hsa_circ_0073402	0.00569427	3.12826	6.23114	5.97133	5.90219	P	P	P	4.01373	4.37354	4.71732	P	P	P	hsa_circ_0073402	circRNA	CAGGGATGTGGTATTTGACTATGATTTTGGACTACAGGATGACTTTATGGGCTCAGCCTT	NA	NA	NA	NA	NA	NA	NA	NA	NA	NA	NA	---	NA	NA	hsa_circ_0073402	chr5	94275787	94278131	-	2344	192	NM_024717	MCTP1
hsa_circ_0084107	0.000976654	3.1279	7.45087	7.90088	7.83236	P	P	P	6.29643	6.06148	5.90268	P	P	P	hsa_circ_0084107	circRNA	ACAAATGCAAATCTCAGAAAAAATGAAGATAAATTGAACCATCATCAGCGAATTGGGCTG	NA	NA	NA	NA	NA	NA	NA	NA	NA	NA	NA	Dlgap2	NA	NA	hsa_circ_0084107	chr8	42213033	42214741	+	1708	107	NM_002690	POLB
hsa_circ_0022772	0.00637702	3.12594	6.57857	6.3013	6.43992	P	P	P	4.90716	5.0254	4.39254	P	P	P	hsa_circ_0022772	circRNA	TCCTTGCCCTGCGGGCTTGAGACCATCTCTACAGCCACAGGGCGGAAACTGCTGGTGTCT	NA	NA	NA	NA	NA	NA	NA	NA	NA	NA	NA	Rheb	NA	NA	hsa_circ_0022772	chr11	64882947	64883070	+	123	123	NM_003273	TM7SF2
hsa_circ_0016202	0.012536	3.12544	3.64604	3.68654	3.85418	P	P	P	2.41662	1.64112	2.10228	A	A	A	hsa_circ_0016202	circRNA	AAAGGTGATTGGAATGTTTGAGAACAGCAGCAAGATCGTGATCGTCATGGAGTATGCCAG	NA	NA	NA	NA	NA	NA	NA	NA	NA	NA	NA	arfgap2	NA	NA	hsa_circ_0016202	chr1	205271190	205277860	-	6670	2922	NM_030952	NUAK2
hsa_circ_0072560	0.0106584	3.12426	3.33867	4.24055	3.56546	P	P	P	2.03145	2.50103	1.73502	A	A	A	hsa_circ_0072560	circRNA	ACAAGCACAATGCTTCCGTGGAAAAATCACAGTTTTGATGTGGACAATGGCACATCTGCG	NA	NA	NA	NA	NA	NA	NA	NA	NA	NA	NA	Cd300lh	NA	NA	hsa_circ_0072560	chr5	58271483	58511794	-	240311	1558	NM_001197220	PDE4D
hsa_circ_0057245	0.000191485	3.12237	10.296	10.2565	10.0503	P	P	P	8.73707	8.48743	8.44468	P	P	P	hsa_circ_0057245	circRNA	TTCTTAGTGCCGTCCATATCCTGAATAAAGATACCGTGTTTTCTTTCCTTGGCCTGCTCC	NA	NA	NA	NA	NA	NA	NA	NA	NA	NA	NA	Olr592	NA	NA	hsa_circ_0057245	chr2	182756471	182759422	+	2951	2614	NM_001130445	SSFA2
hsa_circ_0046931	0.0132064	3.11881	5.4106	5.49887	5.24554	P	P	P	3.32543	4.14295	3.65655	P	P	P	hsa_circ_0046931	circRNA	CTGTGAAAGAGGCTGAAGGAGAAAAAATTGATTCAGAAGAGGCACTGATCTATGAAGAGG	NA	NA	NA	NA	NA	NA	NA	NA	NA	NA	NA	COX17	NA	NA	hsa_circ_0046931	chr18	10770145	10857209	-	87064	2379	NM_022068	PIEZO2
hsa_circ_0079945	0.020528	3.11842	5.14096	4.95108	4.83764	P	P	P	2.71016	3.56993	3.58306	A	P	P	hsa_circ_0079945	circRNA	TTCCAATGAGCATATAAATAACGACCATATTCATGGAGAGAAGAAGGAGTTCGTGTGCAG	NA	NA	NA	NA	NA	NA	NA	NA	NA	NA	NA	---	NA	NA	hsa_circ_0079945	chr7	42017156	42018347	-	1191	315	NM_000168	GLI3
hsa_circ_0009597	0.0475896	3.11479	2.99263	3.94164	4.34252	P	P	P	2.44867	1.94989	2.22626	A	A	A	hsa_circ_0009597	circRNA	TCATCTGTAGCATTCAAGACTTCAAACTGGAGGTGATTGTCTAGGAGTAACTGTATGTGC	NA	NA	NA	NA	NA	NA	NA	NA	NA	NA	NA	Igf2bp2	NA	NA	hsa_circ_0009597	chr1	8684368	8852647	-	168279	725	NM_012102	RERE
hsa_circ_0073794	0.00208787	3.11422	7.66686	7.38727	7.44033	P	P	P	5.54339	6.00897	5.99428	P	P	P	hsa_circ_0073794	circRNA	TTTTACAAAGACAGCCTGAAGGGGACCTGTTGGCTCAACATCCAGGACAGCCGCTGTGAG	NA	NA	NA	NA	NA	NA	NA	NA	NA	NA	NA	---	NA	NA	hsa_circ_0073794	chr5	127681048	127686697	-	5649	543	NM_001999	FBN2
hsa_circ_0023373	0.000477894	3.11263	8.49956	8.14975	8.42698	P	P	P	6.7822	6.87833	6.4979	P	P	P	hsa_circ_0023373	circRNA	TGGGGCGACTGTGTCTGGCTGCCTTATCTTTACACGCTGCAGAATCGCTGACATCATCCG	NA	NA	NA	NA	NA	NA	NA	NA	NA	NA	NA	---	NA	NA	hsa_circ_0023373	chr11	71148857	71159477	-	10620	1236	NM_001360	DHCR7
hsa_circ_0089334	0.0330982	3.11119	3.55807	2.66312	3.01636	P	P	P	1.53755	0.599844	2.00139	A	A	A	hsa_circ_0089334	circRNA	TGACCATTGGGGTCACGGTGTTTGCCGTGGGGAAGCCCACACAGCTGCTGACACTCACAC	NA	NA	NA	NA	NA	NA	NA	NA	NA	NA	NA	---	NA	NA	hsa_circ_0089334	chr9	136030564	136030699	-	135	135	NM_021996	GBGT1
hsa_circ_0055036	0.000949945	3.11082	10.5128	10.2182	10.3652	P	P	P	8.79561	8.6978	8.70392	P	P	P	hsa_circ_0055036	circRNA	CAGTTCTGTCATCATCACCACCACACACTGTGAAAGCTGCACTCCAGGTCAGCATGAACG	NA	NA	NA	NA	NA	NA	NA	NA	NA	NA	NA	---	NA	NA	hsa_circ_0055036	chr2	69351696	69351775	+	79	79	NM_032208	ANTXR1
hsa_circ_0078060	0.0206855	3.10832	6.37522	7.16336	7.14707	P	P	P	5.1865	5.40356	5.31024	P	P	P	hsa_circ_0078060	circRNA	AAATGGAACTTAAACGCAGACTCAGCAGAAAGTTTCACAACCAAAGAGGAGCTGGGGAAG	NA	NA	NA	NA	NA	NA	NA	NA	NA	NA	NA	Chpf2	NA	NA	hsa_circ_0078060	chr6	144093394	144104417	+	11023	475	NM_001100164	PHACTR2
hsa_circ_0064846	0.0230471	3.09972	5.89494	6.85487	6.81155	P	P	P	5.10017	5.04923	4.66476	P	P	P	hsa_circ_0064846	circRNA	TTCCTGCCAAAAATAAACATGTGAAACTGCACCTCCCAGTGCAACGTCAGCTTAAAGAAG	NA	NA	NA	NA	NA	NA	NA	NA	NA	NA	NA	---	NA	NA	hsa_circ_0064846	chr3	37988547	38025960	+	37413	4354	NM_001008392	CTDSPL
hsa_circ_0055673	0.032708	3.09599	4.93078	5.91859	5.81039	P	P	P	3.84995	4.06147	4.03559	P	P	P	hsa_circ_0055673	circRNA	GAAAATCCAATAAAAAGACACCAGTGTGAATCCACAGCCCCTGTCAAAGGGAACAGGAAG	NA	NA	NA	NA	NA	NA	NA	NA	NA	NA	NA	---	NA	NA	hsa_circ_0055673	chr2	97213138	97218371	+	5233	2102	NM_212481	ARID5A
hsa_circ_0017005	0.0104295	3.09301	4.38777	4.32485	4.42276	P	P	P	3.0215	2.7651	2.39605	P	P	A	hsa_circ_0017005	circRNA	TCGACAAACCGACCAATTTAGGAGGTACTAATTTGGTCGAAGCAGATAACCAAGCGGAGT	NA	NA	NA	NA	NA	NA	NA	NA	NA	NA	NA	Plekha8	NA	NA	hsa_circ_0017005	chr1	234529391	234529583	-	192	192	NM_005646	TARBP1
hsa_circ_0018220	0.00605939	3.08821	5.9919	5.8518	5.82484	P	P	P	4.07204	4.57712	4.08528	P	P	P	hsa_circ_0018220	circRNA	TAAATCTCGGAGAACAAAAGTGATTCATATGTTCTCCACAGCTGAAGGCCTGCTGACCCA	NA	NA	NA	NA	NA	NA	NA	NA	NA	NA	NA	---	NA	NA	hsa_circ_0018220	chr10	38652423	38654939	+	2516	693	NR_003086	HSD17B7P2
hsa_circ_0046918	0.00045959	3.08627	5.6235	5.3677	5.23947	P	P	P	3.58306	3.87761	3.89821	P	P	P	hsa_circ_0046918	circRNA	TGGCCATCGTCTATACTGAGGCATGATGTTGCCGTCTTTGACATCATCTGTGTATTTTTT	NA	NA	NA	NA	NA	NA	NA	NA	NA	NA	NA	Cotl1	NA	NA	hsa_circ_0046918	chr18	10704391	10855564	-	151173	5216	NM_022068	PIEZO2
hsa_circ_0008345	0.0478822	3.08455	3.13981	4.27026	4.3448	P	P	P	2.19077	2.60756	2.3336	A	A	A	hsa_circ_0008345	circRNA	AACGGACAAGGGCTGCAATATATGAATTGAGAATTCGTTATTTGCCAAAAGGATTTCTAA	NA	NA	NA	NA	NA	NA	NA	NA	NA	NA	NA	ftcd	NA	NA	hsa_circ_0008345	chr8	141828375	141874498	-	46123	505	NM_001199649	PTK2
hsa_circ_0068529	0.00453289	3.08168	9.86419	9.47506	9.54448	P	P	P	8.04449	8.02147	7.97631	P	P	P	hsa_circ_0068529	circRNA	GGTAGGGGCGGGGATCACACAGGATCCGGAGCTGGTGCTGATAACAGCGGAATCCCCCGT	NA	NA	NA	NA	NA	NA	NA	NA	NA	NA	NA	---	NA	NA	hsa_circ_0068529	chr3	193853930	193855073	+	1143	767	NM_005524	HES1
hsa_circ_0073379	0.000828788	3.08148	6.51319	6.2811	6.07359	P	P	P	4.56091	4.8472	4.60574	P	P	P	hsa_circ_0073379	circRNA	AGATGACAAGTTTCAGACCCAAAGTTTACGCCTATCAGACCTACACAGAAAATCGCATCT	NA	NA	NA	NA	NA	NA	NA	NA	NA	NA	NA	---	NA	NA	hsa_circ_0073379	chr5	94114814	94248681	-	133867	1260	NM_024717	MCTP1
hsa_circ_0072772	0.0163722	3.08113	4.84551	5.76923	5.67045	P	P	P	4.00124	4.00663	3.52035	P	P	P	hsa_circ_0072772	circRNA	TTAGCAGAGTTACTTCTAAGGATCAAACTTGGACATAGATCAGAAGCTAAAGATGGTATA	NA	NA	NA	NA	NA	NA	NA	NA	NA	NA	NA	---	NA	NA	hsa_circ_0072772	chr5	68548244	68558131	+	9887	501	NM_001799	CDK7
hsa_circ_0025445	0.0425245	3.07959	3.83211	3.80741	4.06727	P	P	P	2.08479	1.55127	2.8956	A	A	P	hsa_circ_0025445	circRNA	AATCAATCTACAAACCAGGGCAGACAGGTCCCAAAGTCTTCATCCAATGAGGAGGTAATG	NA	NA	NA	NA	NA	NA	NA	NA	NA	NA	NA	---	NA	NA	hsa_circ_0025445	chr12	9264972	9265132	-	160	160	NM_000014	A2M
hsa_circ_0072199	0.0105473	3.07563	3.55847	4.20912	4.45532	P	P	P	2.75902	2.5669	2.09836	A	A	A	hsa_circ_0072199	circRNA	GGAGTATAGTAAAACAGTATCTAGATAAAACAGACGTGACTATGCTCTTGTATATAGCAG	NA	NA	NA	NA	NA	NA	NA	NA	NA	NA	NA	1110051M20Rik	NA	NA	hsa_circ_0072199	chr5	37057287	37061120	+	3833	597	NM_015384	NIPBL
hsa_circ_0005808	0.00171968	3.07356	8.48795	8.338	8.33382	P	P	P	6.68043	6.60458	6.99079	P	P	P	hsa_circ_0005808	circRNA	AAGGCATCATCCACTCAAGAACAAATCCGTCAAGGCCTAGAAGAACTCCAGAAAGTTCTG	NA	NA	NA	NA	NA	NA	NA	NA	NA	NA	NA	---	NA	NA	hsa_circ_0005808	chr2	69297778	69304620	+	6842	346	NM_032208	ANTXR1
hsa_circ_0017595	0.0405803	3.0709	5.48392	6.4484	6.48503	P	P	P	4.60235	4.63778	4.52321	P	P	P	hsa_circ_0017595	circRNA	TCATTGGAAAACATTTTGACTTTGGCTGGGTGAGACGGTTTAAGCGGAAGCATCTTACTG	NA	NA	NA	NA	NA	NA	NA	NA	NA	NA	NA	---	NA	NA	hsa_circ_0017595	chr10	5944982	5969504	+	24522	2828	NM_032807	FBXO18
hsa_circ_0004547	0.000122752	3.06907	5.39233	5.17706	5.22658	P	P	P	3.71776	3.64922	3.58125	P	P	P	hsa_circ_0004547	circRNA	CTCTTTGATATGCCTGGAAACCTTGGCTGCTACAAGGATCATGGAAACCCACCTCCTCTA	NA	NA	NA	NA	NA	NA	NA	NA	NA	NA	NA	---	NA	NA	hsa_circ_0004547	chr22	29517344	29521404	+	4060	279	NM_001039570	KREMEN1
hsa_circ_0070803	0.00320446	3.06853	8.10574	8.14062	7.67814	P	P	P	6.35326	6.0104	6.67618	P	P	P	hsa_circ_0070803	circRNA	GTCGTTAGCGACTGAAAATACAGGAAATGTAAACCAGCAGTGCATTAGAAGTTTGCTTTG	NA	NA	NA	NA	NA	NA	NA	NA	NA	NA	NA	CD9	NA	NA	hsa_circ_0070803	chr4	120460114	120473792	-	13678	324	NM_001083	PDE5A
hsa_circ_0052588	0.00778224	3.06771	7.46521	8.05287	8.05995	P	P	P	6.41835	6.18645	6.18584	P	P	P	hsa_circ_0052588	circRNA	TAAAACTGTTCTTATGTCAGTTTCGTTTTCAGAGTAGAGAACCCATTTGACTTTATGGAG	NA	NA	NA	NA	NA	NA	NA	NA	NA	NA	NA	Lmo2	NA	NA	hsa_circ_0052588	chr2	10269360	10271546	+	2186	2186	NM_001165931	RRM2
hsa_circ_0025443	0.000408154	3.06651	5.8042	5.56472	5.52489	P	P	P	4.16061	3.79962	4.07572	P	P	P	hsa_circ_0025443	circRNA	AATGAAACTTCACACTGAGGCCCAGATCCAAGAAGAAGGAACAGGCAGTATATGGTTCTG	NA	NA	NA	NA	NA	NA	NA	NA	NA	NA	NA	---	NA	NA	hsa_circ_0025443	chr12	9259086	9266139	-	7053	908	NM_000014	A2M
hsa_circ_0057548	4.2209e-06	3.06536	7.32805	7.2141	7.26029	P	P	P	5.62471	5.61213	5.71739	P	P	P	hsa_circ_0057548	circRNA	TAAAAAGCATGAAGAGGAAAATGAGATCCCTGCCAGCGTGTTTGTGAAACAGCCCGTTTC	NA	NA	NA	NA	NA	NA	NA	NA	NA	NA	NA	LOC524810	NA	NA	hsa_circ_0057548	chr2	192699031	192701443	-	2412	2412	NM_004657	SDPR
hsa_circ_0030601	8.94426e-05	3.06429	7.75704	7.57632	7.56281	P	P	P	5.941	6.03699	6.07643	P	P	P	hsa_circ_0030601	circRNA	AAGAATCCAGGAAGGAGATTTCCAAGATTCTGAGAAGTTCCTGCCTCAGAGGGATGAATT	NA	NA	NA	NA	NA	NA	NA	NA	NA	NA	NA	---	NA	NA	hsa_circ_0030601	chr13	95858785	95859035	-	250	250	NM_005845	ABCC4
hsa_circ_0020810	0.0373378	3.06293	6.84137	7.87085	7.81776	P	P	P	6.12345	5.88918	5.8713	P	P	P	hsa_circ_0020810	circRNA	AATAAACTCCTACTAAATCCCTCCGAGTGACCCAGGGCCTGGTCATCGGGCAGCTGAGCA	NA	NA	NA	NA	NA	NA	NA	NA	NA	NA	NA	MIR196-1	NA	NA	hsa_circ_0020810	chr11	2943331	2946476	+	3145	460	NM_183233	SLC22A18
hsa_circ_0016775	0.0440298	3.06129	3.60829	3.86211	4.06168	P	P	P	2.62555	1.30695	2.47078	A	A	P	hsa_circ_0016775	circRNA	AGGGTCACAGAGCCCAAGGCGGTGTTTGCCAAGGAGCAGCCAGCGAGCAGGGAGGTGCAG	NA	NA	NA	NA	NA	NA	NA	NA	NA	NA	NA	Atp7b	NA	NA	hsa_circ_0016775	chr1	228451816	228495232	+	43416	7881	NM_001098623	OBSCN
hsa_circ_0073382	0.0259104	3.05733	4.98315	5.1759	5.03608	P	P	P	3.35005	2.91039	3.92463	P	P	P	hsa_circ_0073382	circRNA	ACGTGATACAAAGTTTTTAGAAGTAAGATAATACACAAGAACCTCAACCCTGTGTGGGAA	NA	NA	NA	NA	NA	NA	NA	NA	NA	NA	NA	---	NA	NA	hsa_circ_0073382	chr5	94134717	94289023	-	154306	1676	NM_024717	MCTP1
hsa_circ_0005516	0.000831308	3.05315	10.1329	10.2162	10.0969	P	P	P	8.63646	8.60309	8.36302	P	P	P	hsa_circ_0005516	circRNA	TGATGTTCCAGAAACTCCAGGACCAGACATCCACGACAGCGATGGCAGTTCCAGCAGCAG	NA	NA	NA	NA	NA	NA	NA	NA	NA	NA	NA	INTS3	NA	NA	hsa_circ_0005516	chr10	121275020	121286936	-	11916	350	NM_001005339	RGS10
hsa_circ_0070811	0.000504612	3.0531	8.00562	8.12938	8.0431	P	P	P	6.37206	6.36052	6.60417	P	P	P	hsa_circ_0070811	circRNA	AACAAGAAATCAGGAAACGGTGGGACATTTACTGAAAAAGATGAAAAGGGCCTGGCGCTC	NA	NA	NA	NA	NA	NA	NA	NA	NA	NA	NA	CD99L2	NA	NA	hsa_circ_0070811	chr4	120488227	120549981	-	61754	1058	NM_001083	PDE5A
hsa_circ_0069798	0.0100172	3.0521	5.09495	5.15927	4.6286	P	P	P	3.40519	3.36863	3.33458	P	P	P	hsa_circ_0069798	circRNA	TATTCAGGCCACGGAATGGAAGAAGGTCAGCAGGGTTCATTTAAAATGTCGTCAGTTGTG	NA	NA	NA	NA	NA	NA	NA	NA	NA	NA	NA	4930415O20Rik	NA	NA	hsa_circ_0069798	chr4	56465308	56471516	-	6208	169	NM_006681	NMU
hsa_circ_0052353	0.0189487	3.05093	3.53083	4.20259	4.60345	P	P	P	2.55469	2.19709	2.87387	A	A	P	hsa_circ_0052353	circRNA	GTGGTAATAAAGGCTTTATTGTTTAAGCCGCTTAAGGCTTGGTGATGTTTGAGGATGTGA	NA	NA	NA	NA	NA	NA	NA	NA	NA	NA	NA	---	NA	NA	hsa_circ_0052353	chr19	58921331	58929692	+	8361	1765	NM_173548	ZNF584
hsa_circ_0082893	0.0161894	3.05047	4.01653	3.01586	3.32457	P	P	P	2.06119	1.51753	2.0721	A	A	A	hsa_circ_0082893	circRNA	TTCATTTGCAATTCATTTGGATTCAAGGTTGGCTCTCAACAGTGCCAGCTGCACTGTCAT	NA	NA	NA	NA	NA	NA	NA	NA	NA	NA	NA	---	NA	NA	hsa_circ_0082893	chr7	150022929	150035245	+	12316	1609	NM_001142928	LRRC61
hsa_circ_0068528	0.000841875	3.04176	9.80442	9.57687	9.5089	P	P	P	8.07402	8.06224	7.953	P	P	P	hsa_circ_0068528	circRNA	CAGATGACGGGGGATCACACAGGATCCGGAGCTGGTGCTGATAACAGCGGAATCCCCCGT	NA	NA	NA	NA	NA	NA	NA	NA	NA	NA	NA	---	NA	NA	hsa_circ_0068528	chr3	193853930	193854837	+	907	531	NM_005524	HES1
hsa_circ_0075514	0.0408788	3.0416	3.97836	5.01306	5.12955	P	P	P	3.30497	3.2981	2.92379	P	P	P	hsa_circ_0075514	circRNA	GATGACAACCAGAAGACATGAGCTAAGGCAAAAGACTGGTTTAAAAGAATTAGAGTTCTT	NA	NA	NA	NA	NA	NA	NA	NA	NA	NA	NA	FAM207A	NA	NA	hsa_circ_0075514	chr6	4052190	4063353	+	11163	3353	NM_003913	PRPF4B
hsa_circ_0041690	0.0129204	3.04144	7.42425	8.24105	8.04805	P	P	P	6.5074	6.34925	6.13888	P	P	P	hsa_circ_0041690	circRNA	AAAGTGCATTCAGTCCATCCTGAAAGAGGATACCACTCCAGTTGCGGAGAGATTTTTCAC	NA	NA	NA	NA	NA	NA	NA	NA	NA	NA	NA	ATF7IP	NA	NA	hsa_circ_0041690	chr17	5290027	5317454	-	27427	1695	NM_002532	NUP88
hsa_circ_0029047	0.000197138	3.0392	5.79212	5.50529	5.54727	P	P	P	4.03334	4.13052	3.87526	P	P	P	hsa_circ_0029047	circRNA	CCTTTCCAGGGCCATCACCACGGAAGGGAAGTACTGGAAGAGCCGCATCGAGATTGTGAT	NA	NA	NA	NA	NA	NA	NA	NA	NA	NA	NA	---	NA	NA	hsa_circ_0029047	chr12	122613683	122615480	+	1797	394	NM_014938	MLXIP
hsa_circ_0065008	0.00127831	3.03853	7.33781	7.31618	7.38115	P	P	P	5.86047	5.75274	5.60086	P	P	P	hsa_circ_0065008	circRNA	AGACTCCAAGGTGTGCCTTGCACATACAAAAAAGAACCTGTTCGTATATCTAATGGAAAT	NA	NA	NA	NA	NA	NA	NA	NA	NA	NA	NA	---	NA	NA	hsa_circ_0065008	chr3	43743706	43756550	+	12844	640	NM_016006	ABHD5
hsa_circ_0074944	0.0216168	3.0374	4.00603	4.04951	3.8418	P	P	P	2.8012	2.28332	1.85746	P	A	A	hsa_circ_0074944	circRNA	CGGTCATAAGAATCCTTGAGCTTGATTTGATTGTCAGAGATGAAGACGGAAATATCTTGG	NA	NA	NA	NA	NA	NA	NA	NA	NA	NA	NA	---	NA	NA	hsa_circ_0074944	chr5	169108747	169111354	+	2607	291	NM_004946	DOCK2
hsa_circ_0016911	2.06e-05	3.03507	3.56447	3.59314	3.72592	P	P	P	2.10489	2.01258	1.96242	A	A	A	hsa_circ_0016911	circRNA	TGCACGGGCATTTGAAGATAGTGACGAGAGGCTGCGAGACTGTGGAAATGACCCTGAGGA	NA	NA	NA	NA	NA	NA	NA	NA	NA	NA	NA	MGC86436	NA	NA	hsa_circ_0016911	chr1	232551239	232596907	-	45668	1942	NM_020808	SIPA1L2
hsa_circ_0081390	0.021474	3.03469	6.55508	7.48838	7.48699	P	P	P	5.76963	5.78557	5.30584	P	P	P	hsa_circ_0081390	circRNA	TTTGCTAATAAAAGTGTTTGTAGATTGTCGACTCAGAGACCAGCAGATGTGATATTTGCC	NA	NA	NA	NA	NA	NA	NA	NA	NA	NA	NA	---	NA	NA	hsa_circ_0081390	chr7	99690403	99690756	-	353	353	NM_182776	MCM7
hsa_circ_0075831	0.0165455	3.03129	3.82109	3.94884	3.65557	P	P	P	2.1399	2.62946	1.73079	A	P	A	hsa_circ_0075831	circRNA	CTTGCTTCTGGATCTGCATTTACTGCTCAACCACATCTAATTTGATGTCCTCTGCAGATT	NA	NA	NA	NA	NA	NA	NA	NA	NA	NA	NA	---	NA	NA	hsa_circ_0075831	chr6	22020567	22191885	+	171318	678	NR_015410	LINC00340
hsa_circ_0087336	0.0154849	3.0312	3.11175	3.98416	4.02088	P	P	P	2.57562	1.99339	1.80115	A	A	A	hsa_circ_0087336	circRNA	ATTGAATGCCATCATCGGGAGGAGAAGAGCAAAGAAAAGCAGTCCGTCTGGATTTGTTTG	NA	NA	NA	NA	NA	NA	NA	NA	NA	NA	NA	Rev3l	NA	NA	hsa_circ_0087336	chr9	84267128	84303596	-	36468	813	NM_005077	TLE1
hsa_circ_0073395	0.000108424	3.03114	5.00609	4.8179	4.754	P	P	P	3.14087	3.3377	3.30429	P	P	P	hsa_circ_0073395	circRNA	TCATTGGCAGATTATGCCAAAAACGTTGAATCCTCAGTGGAGGGAACAATTTGATTTTCA	NA	NA	NA	NA	NA	NA	NA	NA	NA	NA	NA	---	NA	NA	hsa_circ_0073395	chr5	94244955	94245086	-	131	131	NM_024717	MCTP1
hsa_circ_0002480	0.00688025	3.02616	4.71184	4.38818	4.47837	P	P	P	3.29408	2.59098	2.83018	P	P	P	hsa_circ_0002480	circRNA	TGAGAAAATTAATGTGGCAGGCAATGGGAAAACAGTAAGAGGCAGACCAACAGTGATCCA	NA	NA	NA	NA	NA	NA	NA	NA	NA	NA	NA	---	NA	NA	hsa_circ_0002480	chr2	135010665	135028121	+	17456	1715	NM_002410	MGAT5
hsa_circ_0038723	0.000277733	3.02341	7.04104	7.10803	7.30045	P	P	P	5.6422	5.53197	5.49548	P	P	P	hsa_circ_0038723	circRNA	AACGACCCGGCAGATTGAAACCCAGGGCCCCAGGAAACCTGACAGTTCACACCAATGTCT	NA	NA	NA	NA	NA	NA	NA	NA	NA	NA	NA	---	NA	NA	hsa_circ_0038723	chr16	27357787	27357939	+	152	152	NM_000418	IL4R
hsa_circ_0070731	0.000956077	3.02289	8.18551	8.08671	7.91469	P	P	P	6.42927	6.45877	6.52241	P	P	P	hsa_circ_0070731	circRNA	TTGGCTACAAGATCAGTACGACTTCGTGGCGGCAAAAATGAGTTTGAAGGCACAGTGGAA	NA	NA	NA	NA	NA	NA	NA	NA	NA	NA	NA	Fbrsl1	NA	NA	hsa_circ_0070731	chr4	119229590	119259469	-	29879	1129	NM_003619	PRSS12
hsa_circ_0069047	0.0288272	3.01922	4.96587	4.78714	4.96987	P	P	P	3.33856	3.7366	2.68474	P	P	P	hsa_circ_0069047	circRNA	AGCCCTACATGGGTACTCCTTCCAGGATGAGGAGGACATGTTCATGGTGGTGGACCTGCT	NA	NA	NA	NA	NA	NA	NA	NA	NA	NA	NA	PARM1	NA	NA	hsa_circ_0069047	chr4	5332946	5418661	+	85715	302	NM_018401	STK32B
hsa_circ_0073388	0.00109886	3.01596	5.46227	5.57163	5.74294	P	P	P	3.95028	4.02006	4.04105	P	P	P	hsa_circ_0073388	circRNA	GATTTTTAATGCTGGACGAGTGATCCATATGTGAAGTTTAAAATCGGAGGAAAAGAAGTT	NA	NA	NA	NA	NA	NA	NA	NA	NA	NA	NA	---	NA	NA	hsa_circ_0073388	chr5	94206576	94289065	-	82489	1403	NM_024717	MCTP1
hsa_circ_0080156	0.00187283	3.01487	6.60821	6.69415	6.60326	P	P	P	5.00119	4.89025	5.22	P	P	P	hsa_circ_0080156	circRNA	GATGGAGAAGGTATTAAACCTTTCAGAAAAGAGATATGACCTTACGAAGCTTAACCCAAA	NA	NA	NA	NA	NA	NA	NA	NA	NA	NA	NA	Scube2	NA	NA	hsa_circ_0080156	chr7	47436396	47476911	-	40515	874	NM_022748	TNS3
hsa_circ_0073397	0.000547358	3.01364	5.48096	5.55061	5.2927	P	P	P	3.66607	4.0479	3.82225	P	P	P	hsa_circ_0073397	circRNA	CAAGAGCAAGGAACTTTCAGAAAATGAAGTGGTTGGATCTTATTTCTCTGTGAAGTCTCT	NA	NA	NA	NA	NA	NA	NA	NA	NA	NA	NA	---	NA	NA	hsa_circ_0073397	chr5	94248510	94259726	-	11216	309	NM_024717	MCTP1
hsa_circ_0051496	0.00321051	3.01233	8.55246	9.06527	9.04706	P	P	P	7.39935	7.40849	7.12266	P	P	P	hsa_circ_0051496	circRNA	GGATTTACACTGTAATAAAGACTCCTGTGGAAAACCCGCGCGCTGCAGTGCCTTCCCCAC	NA	NA	NA	NA	NA	NA	NA	NA	NA	NA	NA	LOC100193910	NA	NA	hsa_circ_0051496	chr19	45988549	46000313	-	11764	2065	NM_206900	RTN2
hsa_circ_0092245	0.00378886	3.00872	3.94574	4.60978	4.29539	P	P	P	2.563	2.58824	2.97084	A	P	P	hsa_circ_0092245	circRNA	GGACAGTGAGATTGTTGCAAATTTCCTCTTTTAATGGAAAGATGAATGCACTGAATGAAA	NA	NA	NA	NA	NA	NA	NA	NA	NA	NA	NA	Trhde	NA	NA	hsa_circ_0092245	chrY	14848344	14928279	+	79935	3805	NM_004654	USP9Y
hsa_circ_0054325	0.0308012	3.00726	4.64405	5.68461	5.18153	P	P	P	3.65845	3.50787	3.75299	P	P	P	hsa_circ_0054325	circRNA	TCCCTTTCAGTCATAATAAATGATTTACAAAACCCAGGCTGGCAGCTCTTGGCACTCTGC	NA	NA	NA	NA	NA	NA	NA	NA	NA	NA	NA	Ddr1	NA	NA	hsa_circ_0054325	chr2	43968084	43995126	+	27042	3748	NM_172069	PLEKHH2
hsa_circ_0081393	0.018246	3.00651	10.8516	11.4993	11.4871	P	P	P	9.72554	9.73032	9.70779	P	P	P	hsa_circ_0081393	circRNA	CTCCTTTTGCTAATAAAAGTGTTTGTAGATTGTCGTTGGCCCAGCACATCACCTATGTGC	NA	NA	NA	NA	NA	NA	NA	NA	NA	NA	NA	---	NA	NA	hsa_circ_0081393	chr7	99690403	99693093	-	2690	716	NM_182776	MCM7
hsa_circ_0046938	0.00860465	3.00517	5.29538	5.26026	5.62038	P	P	P	3.59019	3.50465	4.2324	P	P	P	hsa_circ_0046938	circRNA	ACTATGCAAGGCTGAAGGAGAAAAAATTGATTCAGAAGAGGCACTGATCTATGAAGAGGA	NA	NA	NA	NA	NA	NA	NA	NA	NA	NA	NA	COX20	NA	NA	hsa_circ_0046938	chr18	10855350	10857209	-	1859	425	NM_022068	PIEZO2
hsa_circ_0091568	0.00048256	3.00457	5.19553	5.02512	5.17321	P	P	P	3.52483	3.57736	3.53553	P	P	P	hsa_circ_0091568	circRNA	AGTTTATTCAAGGCCAATACTGTGCATGGCACCCGCTTCAAATATTGTGCCCATGATGCA	NA	NA	NA	NA	NA	NA	NA	NA	NA	NA	NA	---	NA	NA	hsa_circ_0091568	chrX	131503342	131518726	-	15384	10568	NM_133486	MBNL3
hsa_circ_0073380	0.00440978	3.00068	6.09971	6.08124	5.70485	P	P	P	4.4528	4.35278	4.35543	P	P	P	hsa_circ_0073380	circRNA	AGATGACAAGGTATTTGACTATGATTTTGGACTACAGGATGACTTTATGGGCTCAGCCTT	NA	NA	NA	NA	NA	NA	NA	NA	NA	NA	NA	---	NA	NA	hsa_circ_0073380	chr5	94114814	94278131	-	163317	1629	NM_024717	MCTP1
hsa_circ_0072449	0.000235722	2.99847	6.45317	6.57902	6.26355	P	P	P	4.71026	4.95435	4.88496	P	P	P	hsa_circ_0072449	circRNA	GAAGATATCAACAAGGTTTGAATATCAAATGAGCCTGGAACCTATTAAGCAGACGTGCTG	NA	NA	NA	NA	NA	NA	NA	NA	NA	NA	NA	---	NA	NA	hsa_circ_0072449	chr5	52205991	52249485	+	43494	3145	NM_181501	ITGA1
hsa_circ_0083246	0.0025841	2.99842	4.0327	4.49335	4.5655	P	P	P	2.81383	2.47268	3.0505	P	P	P	hsa_circ_0083246	circRNA	TTTTGCAGACCCAGGCGGCAAGAATATTTTCTAAGACCCTGAACTCCAGATATGTGATGG	NA	NA	NA	NA	NA	NA	NA	NA	NA	NA	NA	prrc2c	NA	NA	hsa_circ_0083246	chr7_gl000195_random	46399	46801	-	402	402	TCONS_00030034	TCONS_00030034
hsa_circ_0024577	0.000744022	2.99815	7.08503	6.69146	6.90152	P	P	P	5.52966	5.29207	5.09837	P	P	P	hsa_circ_0024577	circRNA	ACCTCCACAGGCAAGTGAACAAGACCAAGATCCACAGCGAGTCCTGAGCACCCTGAATGT	NA	NA	NA	NA	NA	NA	NA	NA	NA	NA	NA	---	NA	NA	hsa_circ_0024577	chr11	119181799	119182131	-	332	238	NM_006500	MCAM
hsa_circ_0077740	0.000191624	2.99608	8.53961	8.37686	8.35746	P	P	P	6.68198	6.87649	6.95938	P	P	P	hsa_circ_0077740	circRNA	CCAAAGTACAGGAAATGGGCCTGGGAAGCCGTAGAGTGGTATTGGAAGGAACTGGCCCTG	NA	NA	NA	NA	NA	NA	NA	NA	NA	NA	NA	---	NA	NA	hsa_circ_0077740	chr6	119509569	119526047	-	16478	727	NM_005907	MAN1A1
hsa_circ_0013500	0.00143845	2.9943	8.35973	8.34496	8.22742	P	P	P	6.89203	6.73988	6.53509	P	P	P	hsa_circ_0013500	circRNA	TGAAGTCTGTGGACATGTAAGGACGAGAGTAAAGAGGAAAATCTTATGTCCTGCTGGTCA	NA	NA	NA	NA	NA	NA	NA	NA	NA	NA	NA	---	NA	NA	hsa_circ_0013500	chr1	111729800	111731875	-	2075	870	NM_024901	DENND2D
hsa_circ_0070516	0.0041638	2.99272	5.48013	6.08432	5.72678	P	P	P	4.23179	4.33636	4.02618	P	P	P	hsa_circ_0070516	circRNA	TTTTGAAACCATGTTTCCAGAGATGAATGATATGCTGAGAGAAAAGGTAACTGGAAGAAA	NA	NA	NA	NA	NA	NA	NA	NA	NA	NA	NA	MIR639	NA	NA	hsa_circ_0070516	chr4	103182820	103184350	-	1530	1530	NM_022154	SLC39A8
hsa_circ_0055032	0.00274157	2.99178	8.8192	8.57784	8.49546	P	P	P	7.08534	7.01711	7.06608	P	P	P	hsa_circ_0055032	circRNA	GGAGAGTGAGGCCAGTGAGCAGATTTATTATGAAAACAGACAAGGGTACAGGACAGCCAG	NA	NA	NA	NA	NA	NA	NA	NA	NA	NA	NA	---	NA	NA	hsa_circ_0055032	chr2	69298885	69397421	+	98536	711	NM_032208	ANTXR1
hsa_circ_0057138	0.000683912	2.99174	6.77912	6.77633	6.81456	P	P	P	5.22585	5.1065	5.2891	P	P	P	hsa_circ_0057138	circRNA	ACTTCTTCTGATTGTGGTTTGAATGTTCATAAGCAGTGTTCCAAGATGGTCCCAAATGAC	NA	NA	NA	NA	NA	NA	NA	NA	NA	NA	NA	---	NA	NA	hsa_circ_0057138	chr2	175664041	175677210	-	13169	1470	NM_001822	CHN1
hsa_circ_0069363	4.31513e-05	2.99146	8.08815	7.94355	7.89828	P	P	P	6.36551	6.50932	6.31221	P	P	P	hsa_circ_0069363	circRNA	AAGGTTCATGGGATTGCATCAGGCAGTCAATGGCCTGGGATGGTATTACCACAAATTCAA	NA	NA	NA	NA	NA	NA	NA	NA	NA	NA	NA	LRP8	NA	NA	hsa_circ_0069363	chr4	25777898	25784040	-	6142	389	NM_015187	SEL1L3
hsa_circ_0044791	0.0095317	2.99092	4.12277	4.90395	4.76812	P	P	P	3.21386	3.14614	2.7685	P	P	P	hsa_circ_0044791	circRNA	AGGTGTTGGAAAAACACAATTATGAAGTTGGGATATCTAAAGCAGAAGCCTTAGAAACTC	NA	NA	NA	NA	NA	NA	NA	NA	NA	NA	NA	Grik4	NA	NA	hsa_circ_0044791	chr17	56772291	56772550	+	259	259	NM_058216	RAD51C
hsa_circ_0072505	0.000183567	2.99032	10.0007	9.83952	9.77059	P	P	P	8.28685	8.22731	8.36235	P	P	P	hsa_circ_0072505	circRNA	TCCTCCAAGGTGCCTCCAGAAAAACCTAAAAATTTGAGTTGCATTGTGAACGAGGGGAAG	NA	NA	NA	NA	NA	NA	NA	NA	NA	NA	NA	---	NA	NA	hsa_circ_0072505	chr5	55238497	55264224	-	25727	1649	NM_002184	IL6ST
hsa_circ_0050142	0.00192307	2.98756	7.28158	7.28491	7.28528	P	P	P	5.82439	5.69691	5.5835	P	P	P	hsa_circ_0050142	circRNA	ACGGCGAGAGACACAGCTGTGATCAGTCCCCAGGATCCCACGCTTCTCATCGGCTCCTCC	NA	NA	NA	NA	NA	NA	NA	NA	NA	NA	NA	---	NA	NA	hsa_circ_0050142	chr19	18704874	18710656	-	5782	1140	NM_004750	CRLF1
hsa_circ_0018667	0.00844119	2.98752	2.89961	2.97883	3.27196	P	P	P	1.78608	1.53498	1.01671	A	A	A	hsa_circ_0018667	circRNA	CCTGACGATGTGGTGCTTCAAAGGTCACTGCATCTGGAAGTCGCCGGAGCAGACATATGG	NA	NA	NA	NA	NA	NA	NA	NA	NA	NA	NA	---	NA	NA	hsa_circ_0018667	chr10	72498597	72500918	+	2321	325	NM_139155	ADAMTS14
hsa_circ_0038725	0.00326444	2.98711	7.51129	7.3605	7.68638	P	P	P	5.95807	5.95559	5.92652	P	P	P	hsa_circ_0038725	circRNA	AGCATCACCAATGAAACCCAGGGCCCCAGGAAACCTGACAGTTCACACCAATGTCTCCGA	NA	NA	NA	NA	NA	NA	NA	NA	NA	NA	NA	---	NA	NA	hsa_circ_0038725	chr16	27357787	27367228	+	9441	409	NM_000418	IL4R
hsa_circ_0069578	0.0324786	2.9861	9.82641	10.7987	10.6099	P	P	P	8.96368	8.92154	8.78049	P	P	P	hsa_circ_0069578	circRNA	CCTCAAAAGGAATAAAACTTTTCTGCTGATAAGATAGCCATACAGGCAGCCCATGATGCC	NA	NA	NA	NA	NA	NA	NA	NA	NA	NA	NA	TBPL1	NA	NA	hsa_circ_0069578	chr4	41263892	41270446	+	6554	617	NM_004181	UCHL1
hsa_circ_0069370	5.16716e-05	2.98571	6.22022	6.1847	6.29213	P	P	P	4.56258	4.7375	4.65952	P	P	P	hsa_circ_0069370	circRNA	TCTGCTGACCGCTTCCGGGAGGATTTCCATTATAATGACACAGCTGGGTACTTCATTATT	NA	NA	NA	NA	NA	NA	NA	NA	NA	NA	NA	lrr37	NA	NA	hsa_circ_0069370	chr4	25819759	25823750	-	3991	407	NM_015187	SEL1L3
hsa_circ_0073401	0.0301479	2.98564	5.79557	5.41556	5.3619	P	P	P	3.30575	3.78748	4.52209	P	P	P	hsa_circ_0073401	circRNA	CAGGGATGTGGCCCACAGATGTGACCCTTACTCTGAAAGATCCTCATTATCCTGACCATG	NA	NA	NA	NA	NA	NA	NA	NA	NA	NA	NA	---	NA	NA	hsa_circ_0073401	chr5	94275787	94275899	-	112	112	NM_024717	MCTP1
hsa_circ_0086225	0.035628	2.98448	4.2051	5.28008	4.94777	P	P	P	3.30721	3.16384	3.41681	P	P	P	hsa_circ_0086225	circRNA	GGAACACATTTCAGCTTTACAAGAAGTAAACCACAGATTGCAGAGATAATCAGAAGTTTT	NA	NA	NA	NA	NA	NA	NA	NA	NA	NA	NA	---	NA	NA	hsa_circ_0086225	chr9	2829773	2829948	-	175	175	NM_014878	KIAA0020
hsa_circ_0003845	0.00669516	2.98434	6.98828	6.51265	6.80477	P	P	P	5.2291	5.1612	5.22151	P	P	P	hsa_circ_0003845	circRNA	TACCGCTCTGGGATGGTGTTCCATACTGTGAGTCCGACTACCATGCCCAGTTTGGCATTA	NA	NA	NA	NA	NA	NA	NA	NA	NA	NA	NA	---	NA	NA	hsa_circ_0003845	chr5	148590288	148619451	+	29163	629	NM_014945	ABLIM3
hsa_circ_0013065	8.50014e-05	2.9819	7.94596	7.88327	7.78791	P	P	P	6.18047	6.29716	6.40635	P	P	P	hsa_circ_0013065	circRNA	CCTTTTGCAGATTTATTTGAAAATGCCTATGGGTCTTCAATGAAGGGAAGAGAACTTGAA	NA	NA	NA	NA	NA	NA	NA	NA	NA	NA	NA	Phactr1	NA	NA	hsa_circ_0013065	chr1	85655739	85656435	-	696	696	NM_032184	SYDE2
hsa_circ_0007973	0.00024112	2.97795	7.31738	7.61238	7.56897	P	P	P	6.05383	5.92936	5.79851	P	P	P	hsa_circ_0007973	circRNA	TCAGCAGCTGCAATGGAACCTTACTCAGAAAGAAAAAGATGACAAGTGGAAAAGAGGGAG	NA	NA	NA	NA	NA	NA	NA	NA	NA	NA	NA	MS4A7	NA	NA	hsa_circ_0007973	chr1	40878687	40882768	+	4081	762	NM_022733	SMAP2
hsa_circ_0022226	0.0151816	2.97667	3.42008	4.30013	3.84027	P	P	P	2.46537	2.37544	2.1091	A	A	A	hsa_circ_0022226	circRNA	TTCTAACAGAATAAACCGAGAAGGAAACCAGAGATCAAGGTGAAGAAGGGGCTGCATGTG	NA	NA	NA	NA	NA	NA	NA	NA	NA	NA	NA	RNMT	NA	NA	hsa_circ_0022226	chr11	60697981	60704631	+	6650	2461	NM_017870	TMEM132A
hsa_circ_0073804	0.000564876	2.97344	6.58299	6.40035	6.36456	P	P	P	5.0495	4.88404	4.68457	P	P	P	hsa_circ_0073804	circRNA	TACTCAGAAATGTGAAGATTACAGGACAGGCCCGTGTTTCACTCAGGTCAACAACCAGAT	NA	NA	NA	NA	NA	NA	NA	NA	NA	NA	NA	---	NA	NA	hsa_circ_0073804	chr5	127782173	127800614	-	18441	324	NM_001999	FBN2
hsa_circ_0050143	0.000348916	2.97208	9.08818	8.83406	9.12476	P	P	P	7.55691	7.532	7.23963	P	P	P	hsa_circ_0050143	circRNA	CCCCGCAGTGTGCCCCCAGAGAAACCCGTCAACATCAGCTGCTGGTCCAAGAACATGAAG	NA	NA	NA	NA	NA	NA	NA	NA	NA	NA	NA	---	NA	NA	hsa_circ_0050143	chr19	18707431	18709711	-	2280	627	NM_004750	CRLF1
hsa_circ_0006270	0.000242499	2.97164	6.67473	6.41274	6.6937	P	P	P	5.16006	5.04981	4.85825	P	P	P	hsa_circ_0006270	circRNA	AGTCATCTGCGGATGGTGTTCCATACTGTGAGTCCGACTACCATGCCCAGTTTGGCATTA	NA	NA	NA	NA	NA	NA	NA	NA	NA	NA	NA	---	NA	NA	hsa_circ_0006270	chr5	148590288	148612863	+	22575	313	NM_014945	ABLIM3
hsa_circ_0061154	0.0397849	2.97108	11.0331	11.9513	12.0104	P	P	P	10.2155	10.0918	10.1631	P	P	P	hsa_circ_0061154	circRNA	GTGGGGCCTGGTTCCTCCTGGTTTTCTCCTGCCTCGTGCTGTCTGTGTTTTCCACCATCA	NA	NA	NA	NA	NA	NA	NA	NA	NA	NA	NA	---	NA	NA	hsa_circ_0061154	chr20	62073758	62078190	-	4432	520	NM_172107	KCNQ2
hsa_circ_0078631	0.00431804	2.96908	3.75482	3.71948	3.41044	P	P	P	1.74653	2.39433	1.98244	A	P	A	hsa_circ_0078631	circRNA	TAATAATCAATCACATAGCGCAAAGGACTGCTGATTGCGTGTCTGTGTCATGACCTGGAC	NA	NA	NA	NA	NA	NA	NA	NA	NA	NA	NA	cct8	NA	NA	hsa_circ_0078631	chr6	165792682	165801942	-	9260	329	NR_045597	PDE10A
hsa_circ_0069373	0.00197163	2.96683	8.00713	7.52561	7.63811	P	P	P	6.0123	6.17427	6.30744	P	P	P	hsa_circ_0069373	circRNA	AAACACCCCAGCTTGTTCCAGGCATTGCTGGAGATGGATCTGCTGACCGAGTGGCGGCGG	NA	NA	NA	NA	NA	NA	NA	NA	NA	NA	NA	lrrc1	NA	NA	hsa_circ_0069373	chr4	25819759	25864610	-	44851	1716	NM_015187	SEL1L3
hsa_circ_0059391	0.0136307	2.96506	9.44977	9.2008	8.65005	P	P	P	7.65573	7.38115	7.6542	P	P	P	hsa_circ_0059391	circRNA	AGAACCAAAGCACGACATCATAAAATAAATCCATCAGAATGACACCTTCTCAGGTTGCCT	NA	NA	NA	NA	NA	NA	NA	NA	NA	NA	NA	---	NA	NA	hsa_circ_0059391	chr20	5573972	5585086	-	11114	259	NM_019593	GPCPD1
hsa_circ_0051805	0.0406656	2.95356	14.076	14.9894	15.0694	P	P	P	13.2536	13.2475	13.1372	P	P	P	hsa_circ_0051805	circRNA	TTGGACCAAATGGAAATAAAGCTTTTTGATGCGGCTTCTATTTCGACCGCGATGATGTGG	NA	NA	NA	NA	NA	NA	NA	NA	NA	NA	NA	---	NA	NA	hsa_circ_0051805	chr19	49469026	49470135	+	1109	569	NM_000146	FTL
hsa_circ_0025757	0.00044118	2.95158	8.10567	7.77534	7.86961	P	P	P	6.28558	6.48756	6.30464	P	P	P	hsa_circ_0025757	circRNA	TATACATACTATTCCTCACCTATTCCTACCTCTTGGCCTTCAATGTGTGGCTTCTGCTTG	NA	NA	NA	NA	NA	NA	NA	NA	NA	NA	NA	rsl24d1	NA	NA	hsa_circ_0025757	chr12	29685500	29786269	-	100769	4488	NM_175861	TMTC1
hsa_circ_0072009	0.000190245	2.95112	8.44688	8.27539	8.47648	P	P	P	6.87328	6.87346	6.77402	P	P	P	hsa_circ_0072009	circRNA	ATACATTTCGAGATGACCTTCTCAATTTGCTAAGAGAAAGCCGGCAGTAGACAGCAGGGA	NA	NA	NA	NA	NA	NA	NA	NA	NA	NA	NA	---	NA	NA	hsa_circ_0072009	chr5	16761572	16764505	-	2933	560	NM_012334	MYO10
hsa_circ_0074431	0.0391643	2.95004	2.74641	3.73423	3.29621	P	P	P	1.98274	0.819673	2.13694	A	A	A	hsa_circ_0074431	circRNA	CTCACAAAGAAACCTTGGCTGGGAAAGACCACCTATAACACAATCAAGCTTGATAAACAG	NA	NA	NA	NA	NA	NA	NA	NA	NA	NA	NA	hmgcl	NA	NA	hsa_circ_0074431	chr5	145616860	145638156	+	21296	595	NM_018989	RBM27
hsa_circ_0025440	0.00790258	2.9452	4.9742	4.57862	4.97454	P	P	P	3.5669	2.81081	3.40508	P	P	P	hsa_circ_0025440	circRNA	TCAACACCACCAATGTTATGGGTACCTCTCTTACTGTTAGGGCAGTATATGGTTCTGGTC	NA	NA	NA	NA	NA	NA	NA	NA	NA	NA	NA	---	NA	NA	hsa_circ_0025440	chr12	9256834	9266139	-	9305	1180	NM_000014	A2M
hsa_circ_0082549	0.000152316	2.94298	11.5474	11.3712	11.4772	P	P	P	10.0338	9.90876	9.77537	P	P	P	hsa_circ_0082549	circRNA	AAACCTCAAGAAAAAAAAGTGAAGAAGTCTGACTGTGGAGAATGGCAGTGGAGTGTGTGT	NA	NA	NA	NA	NA	NA	NA	NA	NA	NA	NA	Fyco1	NA	NA	hsa_circ_0082549	chr7	136935976	136938384	-	2408	336	NM_002825	PTN
hsa_circ_0050648	0.000311951	2.94176	12.7875	13.0387	13.1111	P	P	P	11.5894	11.3833	11.2985	P	P	P	hsa_circ_0050648	circRNA	AGTCTTTCCCAGGCTTACTCTCCCAATAAATGTGCTAGAGCTCTGCGTGCCGACGGACCC	NA	NA	NA	NA	NA	NA	NA	NA	NA	NA	NA	---	NA	NA	hsa_circ_0050648	chr19	36245469	36246795	-	1326	1238	NM_144617	HSPB6
hsa_circ_0053889	0.000597704	2.93927	5.85056	5.61733	5.68883	P	P	P	4.37195	4.04407	4.06008	P	P	P	hsa_circ_0053889	circRNA	AATGGACAGTGCCTTGCTAGCTGTGTTCCGCCATGTCAGAATGGAGGGATGTGTCTCCGG	NA	NA	NA	NA	NA	NA	NA	NA	NA	NA	NA	---	NA	NA	hsa_circ_0053889	chr2	33245975	33505225	+	259250	2547	NM_206943	LTBP1
hsa_circ_0070733	0.000441782	2.93896	8.18514	8.09754	8.04255	P	P	P	6.46656	6.47128	6.71125	P	P	P	hsa_circ_0070733	circRNA	TGGGATTTAAGATCAGTACGACTTCGTGGCGGCAAAAATGAGTTTGAAGGCACAGTGGAA	NA	NA	NA	NA	NA	NA	NA	NA	NA	NA	NA	Fbrsl1	NA	NA	hsa_circ_0070733	chr4	119237336	119259469	-	22133	790	NM_003619	PRSS12
hsa_circ_0085605	0.0251125	2.93491	3.58028	3.08471	3.06084	P	P	P	1.93302	0.959667	2.01647	A	A	A	hsa_circ_0085605	circRNA	CTGGATCAGAAAGAAATATCCAGGAATGATTTTCAGAGTATTTGAGAAAATGAGAGGTGC	NA	NA	NA	NA	NA	NA	NA	NA	NA	NA	NA	---	NA	NA	hsa_circ_0085605	chr8	131179781	131374017	-	194236	952	NM_001247996	ASAP1
hsa_circ_0067823	0.00153056	2.93284	12.0631	11.7113	11.5607	P	P	P	10.3845	10.3141	9.99785	P	P	P	hsa_circ_0067823	circRNA	AATTTCAGCCTCAGAGATTATTCCCTGGCAAATGCAAGTTCTCTGGCATCCACAATACGG	NA	NA	NA	NA	NA	NA	NA	NA	NA	NA	NA	---	NA	NA	hsa_circ_0067823	chr3	158384202	158384533	-	331	331	NM_020169	LXN
hsa_circ_0009034	0.00317908	2.93169	5.9853	5.5066	5.60232	P	P	P	4.20795	4.02583	4.24166	P	P	P	hsa_circ_0009034	circRNA	CGGAAAGTTGATGTGCACTGGGAACTACACCTTTGTTCCTTACATGATAACTCCACATAA	NA	NA	NA	NA	NA	NA	NA	NA	NA	NA	NA	---	NA	NA	hsa_circ_0009034	chr6	136990420	137019820	-	29400	754	NM_005923	MAP3K5
hsa_circ_0077977	0.00102778	2.93119	6.20098	6.46348	6.36963	P	P	P	4.82229	4.55857	4.97993	P	P	P	hsa_circ_0077977	circRNA	ACAAAGACAGATGTTACTGTGGTTAGGTTTCCAATATTGCGGTGGTGGAGATGAGCGATG	NA	NA	NA	NA	NA	NA	NA	NA	NA	NA	NA	---	NA	NA	hsa_circ_0077977	chr6	136977444	137041727	-	64283	1232	NM_005923	MAP3K5
hsa_circ_0064528	0.0156219	2.92997	9.3347	10.1181	10.1272	P	P	P	8.49643	8.43399	8.10005	P	P	P	hsa_circ_0064528	circRNA	ATAAATCATCTATGAGTTAGTGCACCGTGACGAGGGGAGTGTATCCACCAAGCAGATTGT	NA	NA	NA	NA	NA	NA	NA	NA	NA	NA	NA	Il18rap	NA	NA	hsa_circ_0064528	chr3	16357351	16364964	-	7613	1470	NM_015150	RFTN1
hsa_circ_0046922	0.000303582	2.92722	8.85613	8.63202	8.59997	P	P	P	7.04391	7.05089	7.33846	P	P	P	hsa_circ_0046922	circRNA	TAAAGAAGGAAGATGAAGAACCTCCACGAAGGTCAGCATTCCAGCATGTGCATTCCGATA	NA	NA	NA	NA	NA	NA	NA	NA	NA	NA	NA	COX10	NA	NA	hsa_circ_0046922	chr18	10736601	11066221	-	329620	4676	NM_022068	PIEZO2
hsa_circ_0005938	0.00535094	2.92586	6.11272	6.19759	6.14314	P	P	P	4.69573	4.74353	4.33543	P	P	P	hsa_circ_0005938	circRNA	AAGTGGCTAGGAATGCTCCAAAATGGGAAGAAGTTTGATTCATCCAGAGACAGAAACAAA	NA	NA	NA	NA	NA	NA	NA	NA	NA	NA	NA	---	NA	NA	hsa_circ_0005938	chr2	24283683	24286652	+	2969	877	NM_054033	FKBP1B
hsa_circ_0092242	0.000157232	2.92396	4.544	4.39942	4.33608	P	P	P	2.81732	2.93459	2.88933	A	P	P	hsa_circ_0092242	circRNA	GGCTGACAGCTGAGCGAATGGCAGCCTTGATGTTAAAAGTGAAGCATGCCAACGTTTTTT	NA	NA	NA	NA	NA	NA	NA	NA	NA	NA	NA	Trhde	NA	NA	hsa_circ_0092242	chrY	14837045	14848483	+	11438	839	NM_004654	USP9Y
hsa_circ_0087321	0.00114347	2.92014	6.44378	6.75673	6.79084	P	P	P	5.36258	5.08888	4.88672	P	P	P	hsa_circ_0087321	circRNA	CTCCCCCATGACTGAAATCGCCAAGAGATTGAATACGATTTGTGCACAAGTCATCCCATT	NA	NA	NA	NA	NA	NA	NA	NA	NA	NA	NA	RERG	NA	NA	hsa_circ_0087321	chr9	84226683	84268951	-	42268	1020	NM_005077	TLE1
hsa_circ_0054184	0.00173858	2.91892	6.38848	6.78757	6.63417	P	P	P	4.75653	5.12262	5.27462	P	P	P	hsa_circ_0054184	circRNA	TGGAATGCAAGGTAGAAGTTTTAGATCTAATGAGGATGGCTCCAGAAGTTGCAGCTGTTG	NA	NA	NA	NA	NA	NA	NA	NA	NA	NA	NA	---	NA	NA	hsa_circ_0054184	chr2	39481590	39553418	-	71828	2011	NM_003618	MAP4K3
hsa_circ_0056282	0.0063165	2.91785	5.17353	5.28254	5.1617	P	P	P	3.46336	3.53157	3.94318	P	P	P	hsa_circ_0056282	circRNA	GATTGTTCCGCATTCCTCTGAATATTGATTTGCTGAATAGCCCAGACTTATTGGAAGCAA	NA	NA	NA	NA	NA	NA	NA	NA	NA	NA	NA	---	NA	NA	hsa_circ_0056282	chr2	120885263	120925083	+	39820	667	NM_020909	EPB41L5
hsa_circ_0013222	0.0133525	2.91678	5.75118	6.51775	6.30726	P	P	P	4.83886	4.54651	4.64641	P	P	P	hsa_circ_0013222	circRNA	GTTGACTCACAATGATCCAAAAGCAAAACTGTTCATTGTAGAATCAAACTCTTCATCATC	NA	NA	NA	NA	NA	NA	NA	NA	NA	NA	NA	---	NA	NA	hsa_circ_0013222	chr1	94360169	94363454	-	3285	378	NM_002061	GCLM
hsa_circ_0074960	0.000907699	2.91599	6.11137	5.95586	5.72741	P	P	P	4.52005	4.35257	4.30683	P	P	P	hsa_circ_0074960	circRNA	ATCACATTCTGATTGCCTTCACCTACCACCATATCCAGGAGATCATGGTCCAGCTGCTGC	NA	NA	NA	NA	NA	NA	NA	NA	NA	NA	NA	---	NA	NA	hsa_circ_0074960	chr5	169267760	169267856	+	96	96	NM_004946	DOCK2
hsa_circ_0070735	0.000170095	2.91593	8.34798	8.21549	8.1526	P	P	P	6.69415	6.74851	6.64669	P	P	P	hsa_circ_0070735	circRNA	TGCAGCTGGGGATCAGTACGACTTCGTGGCGGCAAAAATGAGTTTGAAGGCACAGTGGAA	NA	NA	NA	NA	NA	NA	NA	NA	NA	NA	NA	Fbrsl1	NA	NA	hsa_circ_0070735	chr4	119259330	119259469	-	139	139	NM_003619	PRSS12
hsa_circ_0045238	0.0256102	2.91293	4.63356	5.60155	5.63047	P	P	P	4.01113	4.08676	3.18283	P	P	P	hsa_circ_0045238	circRNA	ATCCTATTCCTGAATAAAACCAGGATAATGGAAGGCAGCTTTGCTGGGATCGAGGACGAT	NA	NA	NA	NA	NA	NA	NA	NA	NA	NA	NA	---	NA	NA	hsa_circ_0045238	chr17	61896792	61899003	-	2211	1317	NM_017647	FTSJ3
hsa_circ_0083416	0.0472812	2.91285	7.49802	8.57046	8.52697	P	P	P	6.6165	6.8668	6.70562	P	P	P	hsa_circ_0083416	circRNA	GCTTCAAAATGTTTTCTTATATGTTCTTTGAAGATCATATTGATGATGCCAAATATTGTG	NA	NA	NA	NA	NA	NA	NA	NA	NA	NA	NA	---	NA	NA	hsa_circ_0083416	chr8	17086739	17088357	-	1618	1618	NM_013354	CNOT7
hsa_circ_0073398	8.34583e-05	2.91273	6.18664	6.17809	6.02869	P	P	P	4.71686	4.49343	4.55203	P	P	P	hsa_circ_0073398	circRNA	ATCAAGTAAGGTATTTGACTATGATTTTGGACTACAGGATGACTTTATGGGCTCAGCCTT	NA	NA	NA	NA	NA	NA	NA	NA	NA	NA	NA	---	NA	NA	hsa_circ_0073398	chr5	94267657	94278131	-	10474	231	NM_024717	MCTP1
hsa_circ_0004931	0.00243108	2.91011	6.30804	6.3143	6.31835	P	P	P	4.82847	4.616	4.86097	P	P	P	hsa_circ_0004931	circRNA	GGAATCCAAGCTCAAACTTTGGAACAAATACCGAATTTCCAACATTCCATCACTAATATT	NA	NA	NA	NA	NA	NA	NA	NA	NA	NA	NA	atp6v0a1	NA	NA	hsa_circ_0004931	chr17	722678	729318	-	6640	460	NM_022463	NXN
hsa_circ_0069189	0.000480553	2.90944	3.54825	3.37519	3.73547	P	P	P	2.22101	1.92807	1.88659	A	A	A	hsa_circ_0069189	circRNA	GCTGGGAAAGGAAGCACACTTTGCTGGCCAATAATGGGTTTGCAATTTCTGCTGCATTGC	NA	NA	NA	NA	NA	NA	NA	NA	NA	NA	NA	MIR383	NA	NA	hsa_circ_0069189	chr4	9982215	9987417	-	5202	271	NM_001001290	SLC2A9
hsa_circ_0007631	0.0194658	2.90801	4.79881	4.39254	4.93676	P	P	P	3.73541	2.77582	2.83972	P	P	P	hsa_circ_0007631	circRNA	TTTATTTACCTCAGTGAGGCAATGGGAAAACAGTAAGAGGCAGACCAACAGTGATCCAGG	NA	NA	NA	NA	NA	NA	NA	NA	NA	NA	NA	---	NA	NA	hsa_circ_0007631	chr2	135010665	135076310	+	65645	1882	NM_002410	MGAT5
hsa_circ_0017180	0.00245033	2.90783	4.18365	4.5979	4.49186	P	P	P	2.56085	3.13657	2.92982	A	P	P	hsa_circ_0017180	circRNA	TTACTGGACCAGGATTCAACTACATAGTAAAAGGGCGAACGCTGTTGGAGAAGCTGTTCA	NA	NA	NA	NA	NA	NA	NA	NA	NA	NA	NA	---	NA	NA	hsa_circ_0017180	chr1	240286478	240372032	+	85554	2305	NM_020066	FMN2
hsa_circ_0072513	0.00318613	2.90351	10.7707	10.4009	10.3811	P	P	P	9.01441	8.90101	9.05379	P	P	P	hsa_circ_0072513	circRNA	TCAATATAGGACCAAAGATGCCTCAACTTGGAGCCAGGGCAACACACAAGTTTGCTGATT	NA	NA	NA	NA	NA	NA	NA	NA	NA	NA	NA	---	NA	NA	hsa_circ_0072513	chr5	55259179	55260140	-	961	322	NM_002184	IL6ST
hsa_circ_0057936	0.0274332	2.90346	4.80079	4.56759	4.36573	P	P	P	3.59655	2.47854	2.8475	P	P	P	hsa_circ_0057936	circRNA	CTCTGGTCAGTATAAGAAGCATCGCTCTTCTCATGCACATACCAACAACTTTGCAAAGTC	NA	NA	NA	NA	NA	NA	NA	NA	NA	NA	NA	---	NA	NA	hsa_circ_0057936	chr2	207422150	207437919	+	15769	804	NM_003812	ADAM23
hsa_circ_0006057	0.000345808	2.90278	5.30488	5.2344	5.10337	P	P	P	3.84134	3.53181	3.64731	P	P	P	hsa_circ_0006057	circRNA	TTCCTCCAAGAAAACACGAGATTTTTCTCCTATTTCAGCAGTTGGCCACAACTTCATTGC	NA	NA	NA	NA	NA	NA	NA	NA	NA	NA	NA	Btbd2	NA	NA	hsa_circ_0006057	chr8	81942230	81982405	-	40175	153	NM_018440	PAG1
hsa_circ_0079538	0.0089417	2.90104	5.19527	5.01418	4.84584	P	P	P	3.6093	3.02757	3.73583	P	P	P	hsa_circ_0079538	circRNA	AAATCTGTGTGCTGAAGACAATAGATGTGCATCTTCAAATGCAGCATCCTGTGCCAGGTG	NA	NA	NA	NA	NA	NA	NA	NA	NA	NA	NA	---	NA	NA	hsa_circ_0079538	chr7	20403259	20441749	+	38490	1560	NM_002214	ITGB8
hsa_circ_0022529	0.029082	2.89934	3.54046	4.48481	4.61163	P	P	P	2.65652	3.0719	2.4473	A	P	P	hsa_circ_0022529	circRNA	AGGATCATTGAAGAGAACATCCCTGAGATTCCTTATGGCAGAAAGTATGACAAGGCATGG	NA	NA	NA	NA	NA	NA	NA	NA	NA	NA	NA	ATP5O	NA	NA	hsa_circ_0022529	chr11	62568800	62569732	-	932	429	NM_001081491	NXF1
hsa_circ_0069375	6.55644e-05	2.89892	6.56867	6.36241	6.53696	P	P	P	4.85596	4.94136	5.06493	P	P	P	hsa_circ_0069375	circRNA	ATTTCTTACGGAAGAGGAATGTTGTACCATCTTTGGGTAGGCAGACTTCCCTGACGACAT	NA	NA	NA	NA	NA	NA	NA	NA	NA	NA	NA	Lrrc16a	NA	NA	hsa_circ_0069375	chr4	25835069	25849486	-	14417	820	NM_015187	SEL1L3
hsa_circ_0020794	0.000191091	2.89829	8.63741	8.39068	8.54822	P	P	P	6.89925	7.15914	6.90765	P	P	P	hsa_circ_0020794	circRNA	CGTGCTTCCGGCAGGCCCGCAAGCCGTGTGAGCCGTCGCAGCCGTGGCATCGTTGAGGAG	NA	NA	NA	NA	NA	NA	NA	NA	NA	NA	NA	---	NA	NA	hsa_circ_0020794	chr11	2154746	2154895	-	149	149	NM_000612	IGF2
hsa_circ_0078520	0.0322948	2.8981	5.11647	4.97859	3.99805	P	P	P	2.56845	3.52382	3.45005	A	P	P	hsa_circ_0078520	circRNA	TCCTGGCAGGGCAAACATGAGACAGTTGGAGGGCAGCTCTTGCAATCTTATCAGAAGCTG	NA	NA	NA	NA	NA	NA	NA	NA	NA	NA	NA	PICALM	NA	NA	hsa_circ_0078520	chr6	159128261	159129423	+	1162	122	NM_001242394	SYTL3
hsa_circ_0003931	0.002666	2.89494	6.43544	6.30726	6.27329	P	P	P	4.71075	4.63406	5.04231	P	P	P	hsa_circ_0003931	circRNA	GCAGTTTGAGCACAGAAGAGATCCCCTTGAAGATTTTAGCTCATAATAACTTTGTTGGAC	NA	NA	NA	NA	NA	NA	NA	NA	NA	NA	NA	---	NA	NA	hsa_circ_0003931	chr7	23381682	23385681	-	3999	385	NM_006547	IGF2BP3
hsa_circ_0008417	0.00372813	2.89441	5.38024	5.51951	5.50604	P	P	P	4.18656	3.81385	3.77259	P	P	P	hsa_circ_0008417	circRNA	TCATTGGCAGGAACTTTCAGAAAATGAAGTGGTTGGATCTTATTTCTCTGTGAAGTCTCT	NA	NA	NA	NA	NA	NA	NA	NA	NA	NA	NA	---	NA	NA	hsa_circ_0008417	chr5	94244955	94259726	-	14771	440	NM_024717	MCTP1
hsa_circ_0057250	0.000276581	2.89287	9.94624	9.69809	9.6773	P	P	P	8.24827	8.34418	8.14028	P	P	P	hsa_circ_0057250	circRNA	GAAATTATAGATTAAAGAGTCTATTGTTGGGGAAATCAGACGGGAAATTGTAAGTGGACT	NA	NA	NA	NA	NA	NA	NA	NA	NA	NA	NA	Olr661	NA	NA	hsa_circ_0057250	chr2	182792887	182793005	+	118	118	NM_001130445	SSFA2
hsa_circ_0087439	0.000129936	2.89271	9.13754	9.06974	9.30419	P	P	P	7.73283	7.57623	7.6106	P	P	P	hsa_circ_0087439	circRNA	TTTACAGTGTCCTACCAAGATTCCCGCTCTCCATGATCGCTTGTCACATTTTGGAATGCT	NA	NA	NA	NA	NA	NA	NA	NA	NA	NA	NA	Mgam	NA	NA	hsa_circ_0087439	chr9	91666951	91667078	-	127	127	NM_016848	SHC3
hsa_circ_0012913	7.37898e-05	2.88885	7.47331	7.39447	7.2779	P	P	P	5.80661	5.9257	5.82569	P	P	P	hsa_circ_0012913	circRNA	AGATTCAAAACTTGCCAATGTTTACAGTTCTGAGAAGGTTCTCCATCCTGTTTACAATGT	NA	NA	NA	NA	NA	NA	NA	NA	NA	NA	NA	Mir466j	NA	NA	hsa_circ_0012913	chr1	67512947	67516187	-	3240	244	NM_015139	SLC35D1
hsa_circ_0051806	0.040512	2.88799	13.8896	14.7643	14.8468	P	P	P	13.0195	13.0135	13.057	P	P	P	hsa_circ_0051806	circRNA	TGGACCAAATGGAAATAAAGCTTTTTGATGCAGGCTTCTATTTCGACCGCGATGATGTGG	NA	NA	NA	NA	NA	NA	NA	NA	NA	NA	NA	---	NA	NA	hsa_circ_0051806	chr19	49469026	49470136	+	1110	570	NM_000146	FTL
hsa_circ_0067673	0.0153039	2.88697	4.4301	4.33308	4.44354	P	P	P	2.44766	2.93602	3.1501	A	P	P	hsa_circ_0067673	circRNA	TTACAAAGTATTGTTTGAATTTATGAACTTTTTGGCGGAGAACGTCATCTTCTGTTACAT	NA	NA	NA	NA	NA	NA	NA	NA	NA	NA	NA	Morc2	NA	NA	hsa_circ_0067673	chr3	142984063	143214290	-	230227	2329	NM_173653	SLC9A9
hsa_circ_0087243	0.0304422	2.88447	3.38302	4.24777	4.43605	P	P	P	2.36086	2.46504	2.81748	A	A	P	hsa_circ_0087243	circRNA	GCAGTTGATCCAACTTTACTAAAAACAGACGACTTGAAGAATGGCATTGTCAATGAAAAT	NA	NA	NA	NA	NA	NA	NA	NA	NA	NA	NA	tubgcp5	NA	NA	hsa_circ_0087243	chr9	79829244	79842401	+	13157	756	NM_033305	VPS13A
hsa_circ_0027781	0.0273696	2.88358	3.10285	3.38862	3.17814	P	P	P	1.82155	2.05133	1.05019	A	A	A	hsa_circ_0027781	circRNA	AAACGATTCAGCAAAGCGTAGAAGGTTTTCCTCCAAACCAGTTGTACTCACAGAAGCCCA	NA	NA	NA	NA	NA	NA	NA	NA	NA	NA	NA	Tox	NA	NA	hsa_circ_0027781	chr12	95918455	95918564	-	109	109	NM_032147	USP44
hsa_circ_0050771	0.0133333	2.8829	4.18638	4.78639	4.63716	P	P	P	3.00547	3.01992	3.06656	P	P	P	hsa_circ_0050771	circRNA	CAATGCTCTAATATGCAGATTCATAATTAAAAAGAATGTTATTGTTCTAAATGCCCCCCA	NA	NA	NA	NA	NA	NA	NA	NA	NA	NA	NA	---	NA	NA	hsa_circ_0050771	chr19	37085343	37085610	+	267	267	NM_001145649	ZNF529
hsa_circ_0037699	0.0310953	2.8826	3.77552	4.82387	4.70813	P	P	P	2.66889	3.04616	3.17383	A	P	P	hsa_circ_0037699	circRNA	GTTTTCAGCAATTAAACTTTTTTAAGCTGGCCACTGCTGAATGCCATGGTGGCAAAACTG	NA	NA	NA	NA	NA	NA	NA	NA	NA	NA	NA	---	NA	NA	hsa_circ_0037699	chr16	4404542	4405373	-	831	709	NM_024535	CORO7
hsa_circ_0077976	0.00257473	2.88236	5.86634	5.62319	5.88515	P	P	P	4.02149	4.19828	4.53897	P	P	P	hsa_circ_0077976	circRNA	TGATGACAAGATGTGCACTGGGAACTACACCTTTGTTCCTTACATGATAACTCCACATAA	NA	NA	NA	NA	NA	NA	NA	NA	NA	NA	NA	---	NA	NA	hsa_circ_0077976	chr6	136972121	137019820	-	47699	1176	NM_005923	MAP3K5
hsa_circ_0002206	0.00131947	2.88046	9.52534	9.34472	9.37411	P	P	P	7.99603	7.99303	7.65722	P	P	P	hsa_circ_0002206	circRNA	ATCTACCACTGTAATGTGCAGACTCCAAGGGTTAATCATCTCATTTTAGTGGAGCCTTGG	NA	NA	NA	NA	NA	NA	NA	NA	NA	NA	NA	---	NA	NA	hsa_circ_0002206	chr3	43753200	43756550	+	3350	267	NM_016006	ABHD5
hsa_circ_0067839	0.0304647	2.8804	4.30622	5.42968	5.09573	P	P	P	3.25762	3.36966	3.78695	P	P	P	hsa_circ_0067839	circRNA	CCTCAAACTGAACAAGAATTAAAGGAGTTATGAGTTGCAGAAACGAATTGCTGAAATGGA	NA	NA	NA	NA	NA	NA	NA	NA	NA	NA	NA	Mtus2	NA	NA	hsa_circ_0067839	chr3	160131260	160135744	+	4484	691	NM_005496	SMC4
hsa_circ_0077985	0.00182219	2.87791	4.63589	4.54216	4.89699	P	P	P	3.40284	2.88236	3.19175	P	P	P	hsa_circ_0077985	circRNA	TTCAACTTTTGAAGGTGGCACAAGCAAGTTCTAGATATTGCGGTGGTGGAGATGAGCGAT	NA	NA	NA	NA	NA	NA	NA	NA	NA	NA	NA	---	NA	NA	hsa_circ_0077985	chr6	137019626	137041727	-	22101	358	NM_005923	MAP3K5
hsa_circ_0054209	0.000883238	2.87342	7.87302	8.16708	8.13832	P	P	P	6.28258	6.64596	6.6679	P	P	P	hsa_circ_0054209	circRNA	GAGATAACCTGAGAAGACTTTGCAGTTGTGCAGCAAGAAATTATTATGATGAAAGACTGT	NA	NA	NA	NA	NA	NA	NA	NA	NA	NA	NA	---	NA	NA	hsa_circ_0054209	chr2	39542450	39583480	-	41030	843	NM_003618	MAP4K3
hsa_circ_0046914	0.0123308	2.8722	5.55158	5.391	5.80631	P	P	P	3.58862	4.45146	4.04554	P	P	P	hsa_circ_0046914	circRNA	TTCTGGATGTTCTTCATCTTACCTGGTGTGACTGAGAGCATGTGCATTCCGATACAATGG	NA	NA	NA	NA	NA	NA	NA	NA	NA	NA	NA	CORO6	NA	NA	hsa_circ_0046914	chr18	10696071	11066221	-	370150	6787	NM_022068	PIEZO2
hsa_circ_0056279	0.00383932	2.87159	5.20709	5.07988	5.11379	P	P	P	3.78929	3.36305	3.65365	P	P	P	hsa_circ_0056279	circRNA	AGTGCATAAGCATTCCTCTGAATATTGATTTGCTGAATAGCCCAGACTTATTGGAAGCAA	NA	NA	NA	NA	NA	NA	NA	NA	NA	NA	NA	---	NA	NA	hsa_circ_0056279	chr2	120885263	120900707	+	15444	391	NM_020909	EPB41L5
hsa_circ_0082232	0.00803755	2.87132	10.6173	11.1343	11.2116	P	P	P	9.43096	9.39714	9.6282	P	P	P	hsa_circ_0082232	circRNA	AACTCCAAATAAAGTGCGGCTGTCGCAGAGCACCAACATGATGATGGTGGGCGTGCACGG	NA	NA	NA	NA	NA	NA	NA	NA	NA	NA	NA	---	NA	NA	hsa_circ_0082232	chr7	128498389	128499328	+	939	939	NM_001458	FLNC
hsa_circ_0001789	9.94272e-05	2.87009	5.79517	5.69175	5.6214	P	P	P	4.30648	4.16089	4.07332	P	P	P	hsa_circ_0001789	circRNA	TCGGCCTCGGATGGTGGTATAAGTTGAAATCCAAACCAGGAAAGAAGGACAAGGAGCGAG	NA	NA	NA	NA	NA	NA	NA	NA	NA	NA	NA	GNA14	NA	NA	hsa_circ_0001789	chr8	37734626	37735069	-	443	443	NM_025151	RAB11FIP1
hsa_circ_0055030	0.000290145	2.86869	9.10521	8.81938	8.87546	P	P	P	7.39131	7.32594	7.53018	P	P	P	hsa_circ_0055030	circRNA	CTGCACTGTGAGAACAAATCCGTCAAGGCCTAGAAGAACTCCAGAAAGTTCTGCCAGGAG	NA	NA	NA	NA	NA	NA	NA	NA	NA	NA	NA	---	NA	NA	hsa_circ_0055030	chr2	69297778	69379396	+	81618	751	NM_032208	ANTXR1
hsa_circ_0026592	0.00125599	2.8683	9.18932	9.4835	9.5816	P	P	P	8.10922	7.93946	7.63387	P	P	P	hsa_circ_0026592	circRNA	TCCATCATCAAAGAGATCATGCTCAGTGGTGCCGGTGCCCTCACCCCTCAGGACATTCAG	NA	NA	NA	NA	NA	NA	NA	NA	NA	NA	NA	---	NA	NA	hsa_circ_0026592	chr12	53685473	53685872	+	399	276	NM_012291	ESPL1
hsa_circ_0077975	0.0100222	2.86626	5.94321	5.71409	5.81893	P	P	P	3.98598	4.19973	4.65852	P	P	P	hsa_circ_0077975	circRNA	GAGACAGCAGATGTGCACTGGGAACTACACCTTTGTTCCTTACATGATAACTCCACATAA	NA	NA	NA	NA	NA	NA	NA	NA	NA	NA	NA	---	NA	NA	hsa_circ_0077975	chr6	136943985	137019820	-	75835	1538	NM_005923	MAP3K5
hsa_circ_0022395	0.000572711	2.86549	8.56802	8.3418	8.39541	P	P	P	6.92867	6.9604	6.8681	P	P	P	hsa_circ_0022395	circRNA	AATAAGGAATTTTATTCTCCTGACAGCCACCTGCAACGTGGAGCAGTCCTTCTTCAACGA	NA	NA	NA	NA	NA	NA	NA	NA	NA	NA	NA	---	NA	NA	hsa_circ_0022395	chr11	61631178	61634825	+	3647	1922	NM_004265	FADS2
hsa_circ_0078755	0.0017883	2.86534	6.33284	6.3473	6.48332	P	P	P	5.00948	4.93495	4.64222	P	P	P	hsa_circ_0078755	circRNA	TGGGTACAAGGATGATAATGAAGATAATTCAAATGATGGGACCCAGCCATCCAAAAGGAG	NA	NA	NA	NA	NA	NA	NA	NA	NA	NA	NA	CKMT2	NA	NA	hsa_circ_0078755	chr6	170110331	170121207	-	10876	1026	NM_018288	PHF10
hsa_circ_0082208	0.0107785	2.86509	11.0028	11.5122	11.5165	P	P	P	9.83385	9.79671	9.90112	P	P	P	hsa_circ_0082208	circRNA	AAACTCCAAATAAAGTGCGGCTGTCGCAGAGACGCCGACGGCTGTCCCATCGACATCAAG	NA	NA	NA	NA	NA	NA	NA	NA	NA	NA	NA	---	NA	NA	hsa_circ_0082208	chr7	128482284	128499328	+	17044	6808	NM_001458	FLNC
hsa_circ_0039463	0.00230828	2.86411	10.1946	9.91333	9.92712	P	P	P	8.50502	8.45708	8.53535	P	P	P	hsa_circ_0039463	circRNA	AATATGTAAACGACAATAAAACAGTTTTGACTTGAGGGGCTCCTGCTCCTGTGCCAGCTC	NA	NA	NA	NA	NA	NA	NA	NA	NA	NA	NA	---	NA	NA	hsa_circ_0039463	chr16	56652090	56652730	+	640	296	NR_001447	MT1L
hsa_circ_0085830	0.00548423	2.86331	2.88864	3.54851	3.42918	P	P	P	2.12736	1.7039	1.48946	A	A	A	hsa_circ_0085830	circRNA	AGCAGTACTGGGGAATTTTGTACAATAACTGGCACTGAGAGCAGGAAATGAGAAGGAGGA	NA	NA	NA	NA	NA	NA	NA	NA	NA	NA	NA	sedl-1	NA	NA	hsa_circ_0085830	chr8	144391527	144403556	-	12029	929	NM_052963	TOP1MT
hsa_circ_0020177	0.00445336	2.86298	7.98223	8.00412	7.99361	P	P	P	6.46192	6.6508	6.29248	P	P	P	hsa_circ_0020177	circRNA	TGAGAACACCGTCTACCGTCCCCTGTTTTCATAGCCCAAGTTGGCCAAGACCTGGTCTCC	NA	NA	NA	NA	NA	NA	NA	NA	NA	NA	NA	---	NA	NA	hsa_circ_0020177	chr10	121182677	121196353	+	13676	590	NM_005308	GRK5
hsa_circ_0040714	0.00229521	2.86145	8.23535	7.87453	8.10095	P	P	P	6.54029	6.62912	6.51133	P	P	P	hsa_circ_0040714	circRNA	CGTGTAACAGATAGTTTGGGCCACCACCAACAAGATCGGTTGTGCTGTGAACACCTGCCG	NA	NA	NA	NA	NA	NA	NA	NA	NA	NA	NA	---	NA	NA	hsa_circ_0040714	chr16	84884173	84902517	+	18344	422	NM_031476	CRISPLD2
hsa_circ_0017432	0.000976548	2.86039	9.5459	9.41618	9.24339	P	P	P	7.84064	7.86696	7.96224	P	P	P	hsa_circ_0017432	circRNA	GCAAAGTTAAGTTGTTTTACGAATACGTGTTGTAGTCATCCATTAAGCAATCCAGCCGAG	NA	NA	NA	NA	NA	NA	NA	NA	NA	NA	NA	---	NA	NA	hsa_circ_0017432	chr10	1085963	1088702	-	2739	1612	NM_004508	IDI1
hsa_circ_0070802	1.15778e-05	2.85886	7.69336	7.68827	7.57187	P	P	P	6.10876	6.08325	6.21499	P	P	P	hsa_circ_0070802	circRNA	GTCGTTAGCGGGGTTTGCCAACTTGTTAATAAGATGGAGGAGAATACTGGCAAGGTTAAG	NA	NA	NA	NA	NA	NA	NA	NA	NA	NA	NA	Cd9	NA	NA	hsa_circ_0070802	chr4	120460114	120463789	-	3675	236	NM_001083	PDE5A
hsa_circ_0066854	0.00215771	2.85686	7.41473	7.03469	7.30546	P	P	P	5.83305	5.71051	5.68988	P	P	P	hsa_circ_0066854	circRNA	TTATCACCTGGAGACACCTTACACCAACTGGTGCGTTGTAGAAGACAAGAACTCAAAGGT	NA	NA	NA	NA	NA	NA	NA	NA	NA	NA	NA	---	NA	NA	hsa_circ_0066854	chr3	115738361	115805403	-	67042	359	NM_002338	LSAMP
hsa_circ_0078551	0.0146134	2.85498	10.8234	10.7748	10.7473	P	P	P	9.43691	9.43899	8.8557	P	P	P	hsa_circ_0078551	circRNA	AATAGGACCAATTCCAGCCATAAAGCAAGCTGTTCCTTCAATGGTGCCTTAGCTGCTGTT	NA	NA	NA	NA	NA	NA	NA	NA	NA	NA	NA	---	NA	NA	hsa_circ_0078551	chr6	160183950	160198488	+	14538	857	NM_005891	ACAT2
hsa_circ_0078521	0.00142843	2.8549	4.93641	5.00616	4.72111	P	P	P	3.43465	3.34091	3.36117	P	P	P	hsa_circ_0078521	circRNA	CACCACCAGGGCAAACATGAGACAGTTGGAGGGCAGCTCTTGCAATCTTATCAGAAGCTG	NA	NA	NA	NA	NA	NA	NA	NA	NA	NA	NA	PICALM	NA	NA	hsa_circ_0078521	chr6	159128261	159139243	+	10982	326	NM_001242394	SYTL3
hsa_circ_0070736	2.04513e-05	2.85386	6.75387	6.62562	6.67238	P	P	P	5.26214	5.11307	5.13635	P	P	P	hsa_circ_0070736	circRNA	ATGATTCTGATGCATCAGTCATTTGTCACCAGCTGCAGCTGGGGCCCGAGAAGCTGGGGA	NA	NA	NA	NA	NA	NA	NA	NA	NA	NA	NA	FBX011	NA	NA	hsa_circ_0070736	chr4	119259330	119273922	-	14592	688	NM_003619	PRSS12
hsa_circ_0051154	0.00526397	2.85379	5.0348	4.77614	5.23818	P	P	P	3.66725	3.71531	3.08328	P	P	P	hsa_circ_0051154	circRNA	CCTGCCCCAGGAGGAACAAAACCCAGGCACAGAATTCACCAACAAGAACATGCTGATGAC	NA	NA	NA	NA	NA	NA	NA	NA	NA	NA	NA	---	NA	NA	hsa_circ_0051154	chr19	41707135	41709542	+	2407	330	NM_030622	CYP2S1
hsa_circ_0077959	0.000570186	2.85192	6.68224	6.41043	6.70928	P	P	P	5.29872	5.04072	4.9188	P	P	P	hsa_circ_0077959	circRNA	AGACTCTCAACAGGGGCTGAAGAACCGAAACTAAAATGGGAACACATCACAACCCTCATT	NA	NA	NA	NA	NA	NA	NA	NA	NA	NA	NA	---	NA	NA	hsa_circ_0077959	chr6	136878186	136904878	-	26692	1609	NM_005923	MAP3K5
hsa_circ_0038724	6.683e-05	2.85097	7.57495	7.38743	7.56919	P	P	P	5.97976	6.11559	5.90144	P	P	P	hsa_circ_0038724	circRNA	TGGCACAACTTGAAACCCAGGGCCCCAGGAAACCTGACAGTTCACACCAATGTCTCCGAC	NA	NA	NA	NA	NA	NA	NA	NA	NA	NA	NA	---	NA	NA	hsa_circ_0038724	chr16	27357787	27364017	+	6230	309	NM_000418	IL4R
hsa_circ_0003949	0.000316591	2.85043	12.7192	12.4012	12.5575	P	P	P	11.0583	11.1627	10.9315	P	P	P	hsa_circ_0003949	circRNA	AAACCTCAAGAATGCAGGCTCAACAGTACCAGCAGCAGCGTCGAAAATTTGCAGCTGCCT	NA	NA	NA	NA	NA	NA	NA	NA	NA	NA	NA	Fyco1	NA	NA	hsa_circ_0003949	chr7	136935976	136939721	-	3745	452	NM_002825	PTN
hsa_circ_0091732	0.00162479	2.84862	6.22016	6.30053	6.32983	P	P	P	4.69713	4.95362	4.65257	P	P	P	hsa_circ_0091732	circRNA	ATACCGATTTGTTCTCTGTCGCAGTTCTGGGCGCCAACGATCCTGAGAAGAATTTCTTAA	NA	NA	NA	NA	NA	NA	NA	NA	NA	NA	NA	Ap3b2	NA	NA	hsa_circ_0091732	chrX	152034362	152037907	+	3545	826	NM_001129765	NSDHL
hsa_circ_0074941	0.000513277	2.84205	5.34139	5.21907	5.01635	P	P	P	3.73335	3.84126	3.4759	P	P	P	hsa_circ_0074941	circRNA	CATTCTGATTACTGGTATAGGGGATACCTCATAAAGCACAAAATGTTACAGGGCATTTTT	NA	NA	NA	NA	NA	NA	NA	NA	NA	NA	NA	---	NA	NA	hsa_circ_0074941	chr5	169096291	169267856	+	171565	2672	NM_004946	DOCK2
hsa_circ_0025323	0.000611129	2.84126	6.85997	6.9043	7.11117	P	P	P	5.49843	5.38636	5.48119	P	P	P	hsa_circ_0025323	circRNA	TCTTCACGTGGGACAAATGGCTTAAGGCTGCCAGGCTCATTCAAGAGAGCCCCACCCTGA	NA	NA	NA	NA	NA	NA	NA	NA	NA	NA	NA	---	NA	NA	hsa_circ_0025323	chr12	7086528	7086687	-	159	159	NM_005768	LPCAT3
hsa_circ_0046930	9.43499e-05	2.83886	7.42619	7.57257	7.39898	P	P	P	6.08259	5.84669	5.9489	P	P	P	hsa_circ_0046930	circRNA	TGGTCTGGAGGTGTCTCTGTTCAACTATGTATTTTTGATTTCTTGGGCTTTTGCTCTGCC	NA	NA	NA	NA	NA	NA	NA	NA	NA	NA	NA	cox17	NA	NA	hsa_circ_0046930	chr18	10760908	10763096	-	2188	504	NM_022068	PIEZO2
hsa_circ_0080605	0.0126406	2.83815	8.84281	9.4188	9.34832	P	P	P	7.78068	7.70259	7.67521	P	P	P	hsa_circ_0080605	circRNA	TAGACCATTTCCAGGACTTGTGATTAATAACCGGATCATGGCCCAAGTTGCAATGTCCAC	NA	NA	NA	NA	NA	NA	NA	NA	NA	NA	NA	---	NA	NA	hsa_circ_0080605	chr7	74103457	74169869	+	66412	2859	NM_032999	GTF2I
hsa_circ_0031983	0.0440799	2.83764	4.41656	5.49931	5.47285	P	P	P	3.85646	3.77965	3.44606	P	P	P	hsa_circ_0031983	circRNA	CTCTTGGCATATCATATTTGGAGATTATAGCATTTGATGAGCTGAAGACTGATTACAAGA	NA	NA	NA	NA	NA	NA	NA	NA	NA	NA	NA	---	NA	NA	hsa_circ_0031983	chr14	54898825	54903155	-	4330	182	NM_005776	CNIH
hsa_circ_0028305	0.00349026	2.8374	9.3979	9.27799	9.06138	P	P	P	7.78008	7.72449	7.73834	P	P	P	hsa_circ_0028305	circRNA	TGATAGCAAGACCGAGCAGGGGCCGCAGGCTGGCTTTCCCCCTGGTGTGGTCAACATTGT	NA	NA	NA	NA	NA	NA	NA	NA	NA	NA	NA	---	NA	NA	hsa_circ_0028305	chr12	112229109	112230586	+	1477	402	NM_000690	ALDH2
hsa_circ_0050556	0.0356458	2.83703	9.37563	10.3226	10.4381	P	P	P	8.74469	8.73111	8.32476	P	P	P	hsa_circ_0050556	circRNA	GCCCTCCACCTCCACAGATTTTTTTGAATAAACAACCAAACCCAAGAAAGAAGCTTCTTG	NA	NA	NA	NA	NA	NA	NA	NA	NA	NA	NA	srsf1a	NA	NA	hsa_circ_0050556	chr19	34949673	34957919	+	8246	496	NM_005499	UBA2
hsa_circ_0077983	0.00524504	2.83652	5.33906	5.37866	5.26771	P	P	P	3.56724	3.85259	4.01969	P	P	P	hsa_circ_0077983	circRNA	GAGCTTCTTGGAAATAATTTGCCAGAAGAATACTATGTGCACTGGGAACTACACCTTTGT	NA	NA	NA	NA	NA	NA	NA	NA	NA	NA	NA	---	NA	NA	hsa_circ_0077983	chr6	137015277	137026271	-	10994	665	NM_005923	MAP3K5
hsa_circ_0020345	0.0100346	2.83605	4.34701	5.02403	4.98112	P	P	P	3.09487	3.42152	3.39598	P	P	P	hsa_circ_0020345	circRNA	TAAAACCCAGGTGGACCATGGATTCACTAGGTAATGAGGAACAGCAAGAAAAACTGCTCA	NA	NA	NA	NA	NA	NA	NA	NA	NA	NA	NA	---	NA	NA	hsa_circ_0020345	chr10	126673342	126676005	+	2663	2663	NM_017580	ZRANB1
hsa_circ_0067091	0.00360928	2.83192	6.36314	6.00649	6.44519	P	P	P	4.71773	4.73947	4.88323	P	P	P	hsa_circ_0067091	circRNA	TGAGCTGTGCAACCAATCAGAGTCCAGTGGAGAAGGAGTCATGGCCGGCTTCAACATGGG	NA	NA	NA	NA	NA	NA	NA	NA	NA	NA	NA	MIR1291	NA	NA	hsa_circ_0067091	chr3	124826324	124839530	-	13206	969	NM_024628	SLC12A8
hsa_circ_0013196	0.0390149	2.83114	3.66772	4.81825	4.7546	P	P	P	3.20958	2.49507	3.18591	P	P	P	hsa_circ_0013196	circRNA	AATTGAAGCTGCAAATGAAGCATTACTTACTAAAGGTTCGAATTCTGTGCTGCCGGGGTT	NA	NA	NA	NA	NA	NA	NA	NA	NA	NA	NA	---	NA	NA	hsa_circ_0013196	chr1	93646280	93730458	+	84178	4046	NM_206886	CCDC18
hsa_circ_0073396	0.00387327	2.83111	6.36437	6.21542	5.95228	P	P	P	4.65802	4.64316	4.754	P	P	P	hsa_circ_0073396	circRNA	TCATTGGCAGTTTCAGACCCAAAGTTTACGCCTATCAGACCTACACAGAAAATCGCATCT	NA	NA	NA	NA	NA	NA	NA	NA	NA	NA	NA	---	NA	NA	hsa_circ_0073396	chr5	94244955	94248681	-	3726	302	NM_024717	MCTP1
hsa_circ_0079038	0.00344367	2.8302	6.66517	6.55967	6.5464	P	P	P	5.10077	5.27783	4.86314	P	P	P	hsa_circ_0079038	circRNA	ATCATCACGGAGGGCAGCACGCTGAGGAAACGCAAGATGTACGAGGAGTTCCTCAGCAAG	NA	NA	NA	NA	NA	NA	NA	NA	NA	NA	NA	ERGIC1	NA	NA	hsa_circ_0079038	chr7	618892	624205	-	5313	183	NM_001164761	PRKAR1B
hsa_circ_0069727	0.000243384	2.82692	13.3784	13.1701	13.2147	P	P	P	11.7937	11.7855	11.6925	P	P	P	hsa_circ_0069727	circRNA	TCCGACTGGTGGAGAAGCCTGGCAGGTTAATAAACTTACTTGGCCTGACCCCGCCCCGCG	NA	NA	NA	NA	NA	NA	NA	NA	NA	NA	NA	Nav2	NA	NA	hsa_circ_0069727	chr4	53578620	53580305	+	1685	855	NR_024031	SNHG13
hsa_circ_0092146	5.55308e-05	2.82303	6.77707	6.74	6.73057	P	P	P	5.19518	5.25331	5.30571	P	P	P	hsa_circ_0092146	circRNA	GAAATGCCAATTTTTGATCAGTTGGATGTTGTTTCCTACGAGGAAGTCGTTCGGCTCCCT	NA	NA	NA	NA	NA	NA	NA	NA	NA	NA	NA	---	NA	NA	hsa_circ_0092146	chrX	154006958	154012383	-	5425	1110	NM_001166462	MPP1
hsa_circ_0024582	0.001222	2.82186	5.55881	5.41337	5.56721	P	P	P	4.21905	3.90338	3.90903	P	P	P	hsa_circ_0024582	circRNA	GAGAGAAGAGGTCGCTACCTGTGTAGGGAGGAACGGGTACCCCATTCCTCAAGTCATCTG	NA	NA	NA	NA	NA	NA	NA	NA	NA	NA	NA	---	NA	NA	hsa_circ_0024582	chr11	119182761	119185286	-	2525	672	NM_006500	MCAM
hsa_circ_0079593	0.0130876	2.82151	5.33002	5.10972	5.20511	P	P	P	3.96797	3.27417	3.83242	P	P	P	hsa_circ_0079593	circRNA	GCAGTTTGAGATTGCAGGAATTGACGCTGTATAATCCAGAACGCACTATTACAGTTAAAG	NA	NA	NA	NA	NA	NA	NA	NA	NA	NA	NA	---	NA	NA	hsa_circ_0079593	chr7	23381682	23383472	-	1790	262	NM_006547	IGF2BP3
hsa_circ_0050583	0.000109293	2.82136	6.01805	5.88682	6.13389	P	P	P	4.49975	4.64009	4.41101	P	P	P	hsa_circ_0050583	circRNA	ATCCGGCCAGAAAGTCCAAAGGAACACGACCCGTTCACTTACGACTACCAGTCCCTGCAG	NA	NA	NA	NA	NA	NA	NA	NA	NA	NA	NA	---	NA	NA	hsa_circ_0050583	chr19	35631500	35633675	+	2175	247	NM_005031	FXYD1
hsa_circ_0030811	0.0480396	2.81599	3.07776	4.08839	4.09984	P	P	P	2.43506	2.2182	2.34115	A	A	A	hsa_circ_0030811	circRNA	GACTGAACTAGGAAAGAAAGCTAGTAAATGAATCATCACATTATGATCTAGCCTTTACAG	NA	NA	NA	NA	NA	NA	NA	NA	NA	NA	NA	Setbp1	NA	NA	hsa_circ_0030811	chr13	103292619	103301836	+	9217	1039	NM_003291	TPP2
hsa_circ_0070730	0.000350002	2.81507	8.34789	8.11016	8.02777	P	P	P	6.57693	6.61569	6.82102	P	P	P	hsa_circ_0070730	circRNA	ATTCTTTAAGGATCAGTACGACTTCGTGGCGGCAAAAATGAGTTTGAAGGCACAGTGGAA	NA	NA	NA	NA	NA	NA	NA	NA	NA	NA	NA	Fbp2	NA	NA	hsa_circ_0070730	chr4	119216932	119259469	-	42537	1414	NM_003619	PRSS12
hsa_circ_0011413	0.000483833	2.81298	9.33958	9.57015	9.55392	P	P	P	7.95542	8.06886	7.97172	P	P	P	hsa_circ_0011413	circRNA	TTACTGTAACATTTGGAAAAGGAATAAATGTCGTCCCTTTAGGCATTCTGGCGCGGAGCG	NA	NA	NA	NA	NA	NA	NA	NA	NA	NA	NA	---	NA	NA	hsa_circ_0011413	chr1	32799439	32801834	-	2395	1546	NM_023009	MARCKSL1
hsa_circ_0054180	0.00841851	2.81265	3.75302	3.70454	3.63198	P	P	P	2.49484	1.96394	2.10385	A	A	A	hsa_circ_0054180	circRNA	GTGGACCAACTTTATCTGATAATCAGAACACTAGTGTATTCACAGAGATATAAAACCTGA	NA	NA	NA	NA	NA	NA	NA	NA	NA	NA	NA	---	NA	NA	hsa_circ_0054180	chr2	39417445	39431758	-	14313	289	NM_001009565	CDKL4
hsa_circ_0044401	0.0278686	2.81027	3.39729	3.02875	3.54704	P	P	P	1.24151	1.67735	2.39221	A	A	A	hsa_circ_0044401	circRNA	TTGAAAGACAAGTTGCAAGACCTTACCCTTTACAACCCTGAGAGGACCATCACTGTGAAG	NA	NA	NA	NA	NA	NA	NA	NA	NA	NA	NA	---	NA	NA	hsa_circ_0044401	chr17	47119603	47133507	+	13904	7494	NM_006546	IGF2BP1
hsa_circ_0024673	0.0177166	2.80891	4.98719	4.95399	4.87514	P	P	P	3.00584	3.73583	3.51334	P	P	P	hsa_circ_0024673	circRNA	ACCGTATGACTCTCCTGACCAGGACTTGGTATTTTGCAAATGAACCATTTGCTGACTTCC	NA	NA	NA	NA	NA	NA	NA	NA	NA	NA	NA	NIP7	NA	NA	hsa_circ_0024673	chr11	121391365	121490626	+	99261	4678	NM_003105	SORL1
hsa_circ_0007304	0.00128616	2.80702	10.2789	10.0064	9.84588	P	P	P	8.47485	8.48734	8.72177	P	P	P	hsa_circ_0007304	circRNA	TATGAAGATATGCCTCCAGAAAAACCTAAAAATTTGAGTTGCATTGTGAACGAGGGGAAG	NA	NA	NA	NA	NA	NA	NA	NA	NA	NA	NA	---	NA	NA	hsa_circ_0007304	chr5	55256229	55264224	-	7995	603	NM_002184	IL6ST
hsa_circ_0069971	0.0139093	2.80665	3.70003	3.55906	3.70315	P	P	P	2.47226	2.17421	1.76897	P	A	A	hsa_circ_0069971	circRNA	TGAAGCAAGAGCTGACATTATTATCGGACACTTATGTATCAGACATGAAATGACTCCAGT	NA	NA	NA	NA	NA	NA	NA	NA	NA	NA	NA	---	NA	NA	hsa_circ_0069971	chr4	74318117	74318341	+	224	224	NM_001134	AFP
hsa_circ_0056635	0.00563097	2.8064	3.49484	3.19415	3.34522	P	P	P	1.48046	2.05119	1.98722	A	A	A	hsa_circ_0056635	circRNA	GATTGTAAAGGTCAGATGCTATTTATTCAGCCCTCTATGATGGAACAAACATGATAGAAA	NA	NA	NA	NA	NA	NA	NA	NA	NA	NA	NA	---	NA	NA	hsa_circ_0056635	chr2	141291589	141625403	-	333814	3428	NM_018557	LRP1B
hsa_circ_0016139	0.0119168	2.80581	7.36656	7.81015	8.0392	P	P	P	6.39551	6.20934	6.21679	P	P	P	hsa_circ_0016139	circRNA	TCTCCTCCCAGCCACAATGAAAGACGGAACACATTTCTACACCCAGTGACTGGCCAGGTC	NA	NA	NA	NA	NA	NA	NA	NA	NA	NA	NA	Dcc	NA	NA	hsa_circ_0016139	chr1	204210502	204243937	-	33435	2503	NM_014935	PLEKHA6
hsa_circ_0073569	0.00257934	2.80521	9.15156	8.78364	8.82483	P	P	P	7.5286	7.38839	7.40341	P	P	P	hsa_circ_0073569	circRNA	TTTCACTCTGAATTGCTGTGTGATGCGTTACACTACTGCTGGTCAGCTTTGGAATATAAT	NA	NA	NA	NA	NA	NA	NA	NA	NA	NA	NA	Ovol1	NA	NA	hsa_circ_0073569	chr5	110835943	110836814	-	871	871	NM_139164	STARD4
hsa_circ_0040710	0.000780417	2.80227	6.59119	6.38423	6.58321	P	P	P	5.05467	5.20081	4.8286	P	P	P	hsa_circ_0040710	circRNA	AACAACTTGTGTTACCGAGACCTGGGATGACGAACTGGAGAAGTCTGCTGCAGCGTGGGC	NA	NA	NA	NA	NA	NA	NA	NA	NA	NA	NA	---	NA	NA	hsa_circ_0040710	chr16	84879391	84888435	+	9044	469	NM_031476	CRISPLD2
hsa_circ_0056281	0.00881531	2.80219	5.24701	5.35256	5.32503	P	P	P	4.09648	3.76534	3.55258	P	P	P	hsa_circ_0056281	circRNA	TGCACCTCAGCATTCCTCTGAATATTGATTTGCTGAATAGCCCAGACTTATTGGAAGCAA	NA	NA	NA	NA	NA	NA	NA	NA	NA	NA	NA	---	NA	NA	hsa_circ_0056281	chr2	120885263	120922486	+	37223	625	NM_020909	EPB41L5
hsa_circ_0084805	0.00117294	2.79682	5.26709	4.87227	5.05875	P	P	P	3.46629	3.42566	3.84396	P	P	P	hsa_circ_0084805	circRNA	GATGAACGTGAAAACACGAGATTTTTCTCCTATTTCAGCAGTTGGCCACAACTTCATTGC	NA	NA	NA	NA	NA	NA	NA	NA	NA	NA	NA	Btbd2	NA	NA	hsa_circ_0084805	chr8	81903713	81982405	-	78692	410	NM_018440	PAG1
hsa_circ_0070800	0.00367744	2.79131	8.29988	8.31913	7.81678	P	P	P	6.64967	6.35694	6.97417	P	P	P	hsa_circ_0070800	circRNA	CAAAATTCAGACTGAAAATACAGGAAATGTAAACCAGCAGTGCATTAGAAGTTTGCTTTG	NA	NA	NA	NA	NA	NA	NA	NA	NA	NA	NA	CD9	NA	NA	hsa_circ_0070800	chr4	120442089	120473792	-	31703	597	NM_001083	PDE5A
hsa_circ_0067953	0.000415575	2.79062	4.88373	5.06848	5.21464	P	P	P	3.48671	3.53716	3.71053	P	P	P	hsa_circ_0067953	circRNA	AAATTCCATCCTTGGACAGTTAAAAGCAGAGCGTGATGAGACACCCGGATCATGTGTCAT	NA	NA	NA	NA	NA	NA	NA	NA	NA	NA	NA	DAB1	NA	NA	hsa_circ_0067953	chr3	171360629	171406666	-	46037	1255	NM_002662	PLD1
hsa_circ_0004420	0.000273462	2.79005	4.82814	4.56993	4.68378	P	P	P	3.16601	3.17797	3.30451	P	P	P	hsa_circ_0004420	circRNA	TTGAACTTTTCACAGCAAAGCGAGCTGAATTCCTTCTTGTGGACCATTAAGCGAGACCCA	NA	NA	NA	NA	NA	NA	NA	NA	NA	NA	NA	---	NA	NA	hsa_circ_0004420	chr2	85097348	85097909	-	561	561	NM_001080824	C2orf89
hsa_circ_0039215	0.00103408	2.7889	6.84947	6.95862	6.90833	P	P	P	5.57857	5.38465	5.30204	P	P	P	hsa_circ_0039215	circRNA	CCTTAATATTGAAACAGAAACAGGAAAAGGAAATTGACATCTATGCTAACCTGTCTGATG	NA	NA	NA	NA	NA	NA	NA	NA	NA	NA	NA	---	NA	NA	hsa_circ_0039215	chr16	46835958	46836982	-	1024	1024	NM_001001436	C16orf87
hsa_circ_0063509	0.0117208	2.78735	8.39595	8.90372	8.90836	P	P	P	7.30823	7.29692	7.22226	P	P	P	hsa_circ_0063509	circRNA	AAGTCGTGTGGCAGCTTCAGCAACACCCTGGGAGAAGAAGGCTGTGAACAGCTTCAGGAG	NA	NA	NA	NA	NA	NA	NA	NA	NA	NA	NA	H2afz	NA	NA	hsa_circ_0063509	chr22	41641614	41652109	-	10495	1768	NM_002883	RANGAP1
hsa_circ_0072001	3.21048e-05	2.78531	8.34561	8.40354	8.52183	P	P	P	6.90869	7.03676	6.89329	P	P	P	hsa_circ_0072001	circRNA	CATGCAGAAGATTTGACTTTATCTACGATCTTTTTGAACATGTTTCAAGCCGCAACAACC	NA	NA	NA	NA	NA	NA	NA	NA	NA	NA	NA	---	NA	NA	hsa_circ_0072001	chr5	16754936	16758335	-	3399	190	NM_012334	MYO10
hsa_circ_0025080	0.00196423	2.78476	3.85957	3.66263	3.37179	P	P	P	2.17579	2.00172	2.30869	A	A	A	hsa_circ_0025080	circRNA	AAATTATGAAAATTCCAGGCACCTGCTGTGACACATGTCCGGCATGAGAACAGATGTGTG	NA	NA	NA	NA	NA	NA	NA	NA	NA	NA	NA	Ush2a	NA	NA	hsa_circ_0025080	chr12	6061009	6145657	-	84648	5713	NM_000552	VWF
hsa_circ_0017113	0.00398746	2.784	5.41598	5.82735	6.00516	P	P	P	4.27237	4.47619	4.10605	P	P	P	hsa_circ_0017113	circRNA	ATGTGGATGAAGTTGAGGAAACAGGAGTTGGTCACCACAAATGGCATCATTGCTACGAGT	NA	NA	NA	NA	NA	NA	NA	NA	NA	NA	NA	---	NA	NA	hsa_circ_0017113	chr1	236205209	236212289	-	7080	910	NM_002508	NID1
hsa_circ_0017617	0.0372733	2.78374	2.98569	3.31355	3.68703	P	P	P	2.53939	1.46079	1.30901	A	A	A	hsa_circ_0017617	circRNA	TCTTAAAGAGGGCTGCAGACTCCTGTTCCAGAGGTCATTGTTGATGTGGAATCCATGGAC	NA	NA	NA	NA	NA	NA	NA	NA	NA	NA	NA	MC2R	NA	NA	hsa_circ_0017617	chr10	7239509	7247890	-	8381	368	NM_001029880	SFMBT2
hsa_circ_0078014	0.00124456	2.78357	5.22735	4.92035	5.12502	P	P	P	3.39191	3.58916	3.84211	P	P	P	hsa_circ_0078014	circRNA	GTACTGAGGGCGGTTTCCAACCTAGATGAGGAAAGCCGATGGACAGTCCACTACACTGCC	NA	NA	NA	NA	NA	NA	NA	NA	NA	NA	NA	---	NA	NA	hsa_circ_0078014	chr6	138817355	138817508	-	153	153	NM_020464	NHSL1
hsa_circ_0053374	0.000225359	2.7828	7.9036	7.68748	7.67904	P	P	P	6.41617	6.29913	6.12148	P	P	P	hsa_circ_0053374	circRNA	TAAAGTTTGAAAATGCTTTCCACTCTGCCCCGACTATCTGAGATCGGCCAAGATGACTGA	NA	NA	NA	NA	NA	NA	NA	NA	NA	NA	NA	---	NA	NA	hsa_circ_0053374	chr2	30457270	30482899	+	25629	2704	NM_030915	LBH
hsa_circ_0036074	0.000957457	2.78116	5.52779	5.29515	5.23991	P	P	P	4.10849	3.81562	3.69643	P	P	P	hsa_circ_0036074	circRNA	TGACTACATCGGGAAGCGGCACAGCACCAGCTAGGCAGAGACGCCCCAGGCCATGTTAGA	NA	NA	NA	NA	NA	NA	NA	NA	NA	NA	NA	C3H3orf17	NA	NA	hsa_circ_0036074	chr15	69652304	69692454	+	40150	866	NM_001104554	PAQR5
hsa_circ_0027779	0.0185228	2.78009	3.08303	3.13021	3.08746	P	P	P	1.7197	1.18645	1.88179	A	A	A	hsa_circ_0027779	circRNA	AATTCTGAAGGAGCAAAGCGTAGAAGGTTTTCCTCCAAACCAGTTGTACTCACAGAAGCC	NA	NA	NA	NA	NA	NA	NA	NA	NA	NA	NA	Tox	NA	NA	hsa_circ_0027779	chr12	95914772	95918564	-	3792	315	NM_032147	USP44
hsa_circ_0092223	5.76688e-05	2.77864	11.5142	11.6904	11.6578	P	P	P	10.1665	10.0748	10.2011	P	P	P	hsa_circ_0092223	circRNA	CAAATAAACAGTGAATTCTCGTTTCTTAAGGCAATAAACCTTGGATTTCCCTGCCCAGGG	NA	NA	NA	NA	NA	NA	NA	NA	NA	NA	NA	LEP	NA	NA	hsa_circ_0092223	chrY	2734833	2734997	+	164	164	NM_001008	RPS4Y1
hsa_circ_0047295	0.000642827	2.77837	5.09418	5.35343	5.16626	P	P	P	3.69617	3.80331	3.70169	P	P	P	hsa_circ_0047295	circRNA	TGGTAATAAGCTGTAGAAAGGACTCAACAAAGAAAGCTTGAAGAATTACTTTTAGCAGCA	NA	NA	NA	NA	NA	NA	NA	NA	NA	NA	NA	BCAP29	NA	NA	hsa_circ_0047295	chr18	21898711	21914294	-	15583	293	NM_080597	OSBPL1A
hsa_circ_0067949	7.29032e-05	2.77563	5.29029	5.4313	5.26572	P	P	P	3.73013	3.9045	3.93165	P	P	P	hsa_circ_0067949	circRNA	TATTTGATCACAAATGAACCAGTGAGTGAAGGGCATTATCACAACTCCAAGAACCAACTA	NA	NA	NA	NA	NA	NA	NA	NA	NA	NA	NA	s35f4	NA	NA	hsa_circ_0067949	chr3	171064722	171065007	-	285	285	NR_027767	TNIK
hsa_circ_0070726	0.00283918	2.77458	8.05759	7.78262	7.51105	P	P	P	6.17507	6.28099	6.50953	P	P	P	hsa_circ_0070726	circRNA	TTTTCCACCTTGTAGATCAGTACGACTTCGTGGCGGCAAAAATGAGTTTGAAGGCACAGT	NA	NA	NA	NA	NA	NA	NA	NA	NA	NA	NA	FBN1	NA	NA	hsa_circ_0070726	chr4	119201192	119259469	-	58277	4024	NM_003619	PRSS12
hsa_circ_0072010	3.10524e-05	2.77409	8.3086	8.23499	8.41146	P	P	P	6.9139	6.86965	6.7564	P	P	P	hsa_circ_0072010	circRNA	ATACATTTCGAGATGACCTTCTCAATTTGCTAAGAGAAAGCCGCTTTGGGCAGATCTGCG	NA	NA	NA	NA	NA	NA	NA	NA	NA	NA	NA	---	NA	NA	hsa_circ_0072010	chr5	16761572	16766307	-	4735	679	NM_012334	MYO10
hsa_circ_0070795	0.000533319	2.7702	8.50349	8.53332	8.46926	P	P	P	6.97892	6.96989	7.14145	P	P	P	hsa_circ_0070795	circRNA	TTACAAAACCCTGGCCTATTCAACAACGGAGAAATGGTCAATGCATGGTTTGCTGAGAGA	NA	NA	NA	NA	NA	NA	NA	NA	NA	NA	NA	Cd83	NA	NA	hsa_circ_0070795	chr4	120425690	120528452	-	102762	2179	NM_001083	PDE5A
hsa_circ_0070807	0.00625825	2.76977	8.60042	8.57657	8.22223	P	P	P	7.02714	6.97569	7.01675	P	P	P	hsa_circ_0070807	circRNA	AGATTGCTCCGACTTTGCTGCTTATTTGGCATTTTGTGGTATTGTTCTTCATAATGCTCA	NA	NA	NA	NA	NA	NA	NA	NA	NA	NA	NA	Cd96	NA	NA	hsa_circ_0070807	chr4	120483987	120486565	-	2578	228	NM_001083	PDE5A
hsa_circ_0072006	0.00076664	2.76586	8.35324	8.37795	8.40044	P	P	P	7.0156	6.86558	6.84141	P	P	P	hsa_circ_0072006	circRNA	ACAGTTCAAGATTTGACTTTATCTACGATCTTTTTGAACATGTTTCAAGCCGCAACAACC	NA	NA	NA	NA	NA	NA	NA	NA	NA	NA	NA	---	NA	NA	hsa_circ_0072006	chr5	16758226	16758335	-	109	109	NM_012334	MYO10
hsa_circ_0005540	0.000375897	2.76447	6.16902	5.93682	5.88352	P	P	P	4.34055	4.58232	4.66259	P	P	P	hsa_circ_0005540	circRNA	TGCTTTTGTGTTTCAGACCCAAAGTTTACGCCTATCAGACCTACACAGAAAATCGCATCT	NA	NA	NA	NA	NA	NA	NA	NA	NA	NA	NA	---	NA	NA	hsa_circ_0005540	chr5	94204037	94248681	-	44644	1086	NM_024717	MCTP1
hsa_circ_0046855	0.00111716	2.76265	11.0546	10.7744	10.766	P	P	P	9.3223	9.4197	9.47005	P	P	P	hsa_circ_0046855	circRNA	ATGCTGTGTCTTGGGGCCCTTTGGGACGAGTGCTGTGACTGTGTTGCTCTTTAAGGTGCC	NA	NA	NA	NA	NA	NA	NA	NA	NA	NA	NA	Spata18	NA	NA	hsa_circ_0046855	chr18	9334764	9360069	+	25305	414	NM_020648	TWSG1
hsa_circ_0072508	0.000418276	2.7609	11.2412	11.0699	10.9171	P	P	P	9.57877	9.52419	9.73933	P	P	P	hsa_circ_0072508	circRNA	AAACAAGCTCACATTGCCTCCTTTTGAAGCCAATGGAAAAATCTTGGATTATGAAGTGAC	NA	NA	NA	NA	NA	NA	NA	NA	NA	NA	NA	---	NA	NA	hsa_circ_0072508	chr5	55248077	55252063	-	3986	496	NM_002184	IL6ST
hsa_circ_0017682	0.000321137	2.76021	8.46287	8.39493	8.5013	P	P	P	7.06504	7.03455	6.85871	P	P	P	hsa_circ_0017682	circRNA	TAAAGTCTTCATTGACAAACAGACCAATCTGAGCAAGTGCTTTGTGGCTGCTTCAACCCC	NA	NA	NA	NA	NA	NA	NA	NA	NA	NA	NA	---	NA	NA	hsa_circ_0017682	chr10	11356101	11367942	+	11841	462	NM_001025076	CELF2
hsa_circ_0080675	0.00015761	2.75939	8.16617	7.94426	7.93998	P	P	P	6.49171	6.66661	6.50414	P	P	P	hsa_circ_0080675	circRNA	TGCAGACGCAGCAGAGATGGAACTCCACATCCTGGAGCACCGGCTGCAAGTTGCCAGCGT	NA	NA	NA	NA	NA	NA	NA	NA	NA	NA	NA	---	NA	NA	hsa_circ_0080675	chr7	74812090	74867341	-	55251	746	NM_001145064	GATSL2
hsa_circ_0023662	0.0167034	2.75795	7.74564	8.344	8.42529	P	P	P	6.64125	6.83101	6.73621	P	P	P	hsa_circ_0023662	circRNA	ACCGGTCCTTGATTTAATAAACACTATAAAAAGTTCTTTGCTTTACGCGGCCGGCCCGAG	NA	NA	NA	NA	NA	NA	NA	NA	NA	NA	NA	Slco3a1	NA	NA	hsa_circ_0023662	chr11	76494284	76509198	+	14914	2710	NM_015516	TSKU
hsa_circ_0012902	0.000193024	2.75792	7.8387	7.58407	7.7563	P	P	P	6.21972	6.14789	6.41851	P	P	P	hsa_circ_0012902	circRNA	TGGAGATGTGGTGCATCATCCCCTGCTCGACCAGCCACTCCTTTGGTTCCTTGCAGAAGT	NA	NA	NA	NA	NA	NA	NA	NA	NA	NA	NA	Me3	NA	NA	hsa_circ_0012902	chr1	67154830	67154958	+	128	128	NM_032291	SGIP1
[truncated: 4,158 more rows]
